# Supplementary material for: Single-cell immunophenotyping of the fetal immune response to maternal SARS-CoV-2 infection in late gestation
Source: Res Sq. 2021 Mar 16:rs.3.rs-311000. Preprint. [Version 1] doi: 10.21203/rs.3.rs-311000/v1 (PMC7987103; doi:10.21203/rs.3.rs-311000/v1)
Supplement: Supplement [file db7085a6b29e3c255ff5a598.xlsx]

## Sheet: T cells 1
	p_value	term_size	query_size	intersection_size	precision	recall	term_id	source	term_name	effective_domain_size	source_order	foldenrichment
1	3.05053e-24	94	297	32	0.107744	0.340426	GO:0006614	GO:BP	SRP-dependent cotranslational protein targeting to membrane	11578	2620	13.2709
2	6.98399e-24	98	297	32	0.107744	0.326531	GO:0006613	GO:BP	cotranslational protein targeting to membrane	11578	2619	12.7292
3	3.03658e-23	121	297	34	0.114478	0.280992	GO:0000184	GO:BP	nuclear-transcribed mRNA catabolic process, nonsense-mediated decay	11578	79	10.9539
4	1.12998e-22	108	297	32	0.107744	0.296296	GO:0045047	GO:BP	protein targeting to ER	11578	13202	11.5506
5	2.36931e-22	111	297	32	0.107744	0.288288	GO:0072599	GO:BP	establishment of protein localization to endoplasmic reticulum	11578	20550	11.2384
6	4.63302e-21	186	297	38	0.127946	0.204301	GO:0006413	GO:BP	translational initiation	11578	2437	7.9643
7	5.95439e-21	133	297	33	0.111111	0.24812	GO:0070972	GO:BP	protein localization to endoplasmic reticulum	11578	19336	9.67251
8	7.89165e-20	202	297	38	0.127946	0.188119	GO:0000956	GO:BP	nuclear-transcribed mRNA catabolic process	11578	338	7.33347
9	1.945e-19	171	297	35	0.117845	0.204678	GO:0019083	GO:BP	viral transcription	11578	6495	7.97901
10	4.71153e-19	188	297	36	0.121212	0.191489	GO:0019080	GO:BP	viral gene expression	11578	6492	7.46486
11	2.18495e-17	172	297	33	0.111111	0.19186	GO:0006612	GO:BP	protein targeting to membrane	11578	2618	7.47933
12	2.60207e-16	365	297	45	0.151515	0.123288	GO:0006401	GO:BP	RNA catabolic process	11578	2426	4.80614
13	3.33316e-16	335	297	43	0.144781	0.128358	GO:0006402	GO:BP	mRNA catabolic process	11578	2427	5.00381
14	5.06842e-16	574	297	56	0.188552	0.097561	GO:0006412	GO:BP	translation	11578	2436	3.80324
15	1.44215e-15	588	297	56	0.188552	0.0952381	GO:0043043	GO:BP	peptide biosynthetic process	11578	12201	3.71268
16	1.67034e-14	1400	297	89	0.299663	0.0635714	GO:0010629	GO:BP	negative regulation of gene expression	11578	4815	2.47822
17	3.15937e-14	673	297	58	0.195286	0.0861813	GO:0006518	GO:BP	peptide metabolic process	11578	2526	3.35962
18	3.80506e-14	456	297	47	0.158249	0.10307	GO:0034655	GO:BP	nucleobase-containing compound catabolic process	11578	10079	4.018
19	4.24305e-14	1372	297	87	0.292929	0.0634111	GO:0044419	GO:BP	interspecies interaction between organisms	11578	12890	2.47196
20	1.28995e-13	3176	297	146	0.491582	0.0459698	GO:0048519	GO:BP	negative regulation of biological process	11578	14969	1.79205
21	1.28995e-13	472	297	47	0.158249	0.0995763	GO:0046700	GO:BP	heterocycle catabolic process	11578	14427	3.8818
22	1.54143e-13	475	297	47	0.158249	0.0989474	GO:0044270	GO:BP	cellular nitrogen compound catabolic process	11578	12810	3.85728
23	1.60766e-13	1877	297	104	0.350168	0.0554076	GO:0010605	GO:BP	negative regulation of macromolecule metabolic process	11578	4792	2.15996
24	1.70927e-13	682	297	57	0.191919	0.0835777	GO:0043604	GO:BP	amide biosynthetic process	11578	12533	3.25812
25	2.20837e-13	481	297	47	0.158249	0.0977131	GO:0019439	GO:BP	aromatic compound catabolic process	11578	6730	3.80917
26	2.34129e-13	754	297	60	0.20202	0.0795756	GO:0016032	GO:BP	viral process	11578	5689	3.10211
27	3.86708e-13	489	297	47	0.158249	0.0961145	GO:1901361	GO:BP	organic cyclic compound catabolic process	11578	24677	3.74685
28	3.89982e-13	274	297	35	0.117845	0.127737	GO:0090150	GO:BP	establishment of protein localization to membrane	11578	21370	4.9796
29	9.06185e-13	2020	297	107	0.360269	0.0529703	GO:0009892	GO:BP	negative regulation of metabolic process	11578	4253	2.06495
30	9.06185e-13	756	297	59	0.198653	0.0780423	GO:0016071	GO:BP	mRNA metabolic process	11578	5718	3.04234
31	9.28747e-13	780	297	60	0.20202	0.0769231	GO:0044403	GO:BP	symbiotic process	11578	12878	2.9987
32	1.14255e-11	849	297	61	0.205387	0.0718492	GO:0043603	GO:BP	cellular amide metabolic process	11578	12532	2.80091
33	1.59199e-11	365	297	38	0.127946	0.10411	GO:0006605	GO:BP	protein targeting	11578	2611	4.05852
34	1.2505e-10	3041	297	134	0.451178	0.0440645	GO:0010468	GO:BP	regulation of gene expression	11578	4690	1.71777
35	1.46607e-10	472	297	42	0.141414	0.0889831	GO:0072594	GO:BP	establishment of protein localization to organelle	11578	20545	3.46884
36	2.07964e-09	449	297	39	0.131313	0.0868597	GO:0072657	GO:BP	protein localization to membrane	11578	20566	3.38607
37	2.66367e-09	3201	297	135	0.454545	0.0421743	GO:0034645	GO:BP	cellular macromolecule biosynthetic process	11578	10073	1.64409
38	2.66367e-09	3270	297	137	0.461279	0.041896	GO:0009059	GO:BP	macromolecule biosynthetic process	11578	3697	1.63324
39	3.74732e-09	3183	297	134	0.451178	0.0420986	GO:0044271	GO:BP	cellular nitrogen compound biosynthetic process	11578	12811	1.64114
40	3.8278e-09	3813	297	152	0.511785	0.0398636	GO:0010467	GO:BP	gene expression	11578	4689	1.55401
41	1.47751e-08	709	297	49	0.164983	0.0691114	GO:0034097	GO:BP	response to cytokine	11578	9737	2.69418
42	2.26644e-08	647	297	46	0.154882	0.0710974	GO:0071345	GO:BP	cellular response to cytokine stimulus	11578	19541	2.7716
43	5.23666e-08	3939	297	152	0.511785	0.0385885	GO:0060255	GO:BP	regulation of macromolecule metabolic process	11578	17183	1.5043
44	5.33793e-08	3099	297	128	0.430976	0.0413036	GO:0016070	GO:BP	RNA metabolic process	11578	5717	1.61015
45	2.41995e-07	3801	297	146	0.491582	0.0384109	GO:0006139	GO:BP	nucleobase-containing compound metabolic process	11578	2192	1.49738
46	2.76073e-07	1009	297	58	0.195286	0.0574827	GO:0010941	GO:BP	regulation of cell death	11578	5104	2.24086
47	3.14356e-07	1233	297	66	0.222222	0.053528	GO:1901566	GO:BP	organonitrogen compound biosynthetic process	11578	24866	2.08669
48	3.14356e-07	4291	297	159	0.535354	0.0370543	GO:0034641	GO:BP	cellular nitrogen compound metabolic process	11578	10069	1.44449
49	4.66737e-07	764	297	48	0.161616	0.0628272	GO:0033365	GO:BP	protein localization to organelle	11578	9468	2.4492
50	6.19762e-07	3463	297	135	0.454545	0.0389835	GO:0090304	GO:BP	nucleic acid metabolic process	11578	21522	1.5197
51	6.60235e-07	4260	297	157	0.52862	0.0368545	GO:0019222	GO:BP	regulation of metabolic process	11578	6529	1.4367
52	9.11366e-07	938	297	54	0.181818	0.0575693	GO:0043067	GO:BP	regulation of programmed cell death	11578	12224	2.24423
53	9.27721e-07	939	297	54	0.181818	0.057508	GO:0006886	GO:BP	intracellular protein transport	11578	2863	2.24184
54	1.02869e-06	3885	297	146	0.491582	0.0375804	GO:0046483	GO:BP	heterocycle metabolic process	11578	14282	1.465
55	1.03221e-06	2805	297	115	0.387205	0.0409982	GO:0048523	GO:BP	negative regulation of cellular process	11578	14973	1.59824
56	1.04876e-06	1304	297	67	0.225589	0.0513804	GO:0008219	GO:BP	cell death	11578	3595	2.00297
57	1.32168e-06	924	297	53	0.178451	0.0573593	GO:0042981	GO:BP	regulation of apoptotic process	11578	12160	2.23605
58	1.36773e-06	3904	297	146	0.491582	0.0373975	GO:0006725	GO:BP	cellular aromatic compound metabolic process	11578	2726	1.45787
59	1.87147e-06	2340	297	100	0.3367	0.042735	GO:0051641	GO:BP	cellular localization	11578	16140	1.66595
60	2.09855e-06	1446	297	71	0.239057	0.049101	GO:0070727	GO:BP	cellular macromolecule localization	11578	19186	1.91411
61	2.28009e-06	968	297	54	0.181818	0.0557851	GO:0044265	GO:BP	cellular macromolecule catabolic process	11578	12807	2.17468
62	2.3346e-06	6216	297	205	0.690236	0.0329794	GO:0050789	GO:BP	regulation of biological process	11578	15458	1.28564
63	2.38604e-06	1192	297	62	0.208754	0.0520134	GO:0006915	GO:BP	apoptotic process	11578	2889	2.02765
64	2.65583e-06	3873	297	144	0.484848	0.0371805	GO:0044249	GO:BP	cellular biosynthetic process	11578	12797	1.44941
65	3.05208e-06	818	297	48	0.161616	0.0586797	GO:0045321	GO:BP	leukocyte activation	11578	13330	2.28752
66	3.09528e-06	1889	297	85	0.286195	0.0449974	GO:0051649	GO:BP	establishment of localization in cell	11578	16148	1.75414
67	6.88618e-06	1229	297	62	0.208754	0.0504475	GO:0012501	GO:BP	programmed cell death	11578	5159	1.9666
68	7.64416e-06	1438	297	69	0.232323	0.0479833	GO:0034613	GO:BP	cellular protein localization	11578	10050	1.87054
69	8.01558e-06	4012	297	146	0.491582	0.0363908	GO:1901360	GO:BP	organic cyclic compound metabolic process	11578	24676	1.41863
70	8.53968e-06	2254	297	95	0.319865	0.0421473	GO:0042221	GO:BP	response to chemical	11578	11708	1.64303
71	1.13329e-05	1790	297	80	0.26936	0.0446927	GO:0070887	GO:BP	cellular response to chemical stimulus	11578	19275	1.74226
72	1.24253e-05	3967	297	144	0.484848	0.0362995	GO:0009058	GO:BP	biosynthetic process	11578	3696	1.41507
73	1.247e-05	1489	297	70	0.23569	0.0470114	GO:0071310	GO:BP	cellular response to organic substance	11578	19508	1.83265
74	1.30348e-05	3935	297	143	0.481481	0.0363405	GO:1901576	GO:BP	organic substance biosynthetic process	11578	24875	1.41667
75	1.52011e-05	1836	297	81	0.272727	0.0441176	GO:0010033	GO:BP	response to organic substance	11578	4348	1.71985
76	1.57155e-05	1838	297	81	0.272727	0.0440696	GO:0002376	GO:BP	immune system process	11578	1046	1.71797
77	1.60195e-05	583	297	37	0.124579	0.0634648	GO:0060548	GO:BP	negative regulation of cell death	11578	17465	2.47406
78	1.6292e-05	1593	297	73	0.245791	0.0458255	GO:0031324	GO:BP	negative regulation of cellular metabolic process	11578	8321	1.78642
79	1.84572e-05	3742	297	137	0.461279	0.0366114	GO:0051179	GO:BP	localization	11578	15788	1.42723
80	2.16625e-05	1102	297	56	0.188552	0.0508167	GO:0009057	GO:BP	macromolecule catabolic process	11578	3695	1.981
81	2.25692e-05	6541	297	209	0.703704	0.0319523	GO:0065007	GO:BP	biological regulation	11578	18770	1.2456
82	2.67486e-05	1463	297	68	0.228956	0.0464798	GO:0051172	GO:BP	negative regulation of nitrogen compound metabolic process	11578	15781	1.81193
83	3.05753e-05	918	297	49	0.164983	0.0533769	GO:0045934	GO:BP	negative regulation of nucleobase-containing compound metabolic process	11578	13764	2.0808
84	3.27785e-05	893	297	48	0.161616	0.0537514	GO:0001775	GO:BP	cell activation	11578	567	2.0954
85	3.58556e-05	530	297	34	0.114478	0.0641509	GO:0043069	GO:BP	negative regulation of programmed cell death	11578	12226	2.50081
86	4.25994e-05	847	297	46	0.154882	0.0543093	GO:0051253	GO:BP	negative regulation of RNA metabolic process	11578	15848	2.11715
87	5.64871e-05	939	297	49	0.164983	0.0521832	GO:0010558	GO:BP	negative regulation of macromolecule biosynthetic process	11578	4750	2.03427
88	6.48728e-05	520	297	33	0.111111	0.0634615	GO:0043066	GO:BP	negative regulation of apoptotic process	11578	12223	2.47393
89	8.83297e-05	1454	297	66	0.222222	0.045392	GO:0015833	GO:BP	peptide transport	11578	5545	1.76952
90	9.08536e-05	294	297	23	0.0774411	0.0782313	GO:0042254	GO:BP	ribosome biogenesis	11578	11720	3.0497
91	0.000102431	904	297	47	0.158249	0.0519912	GO:2000113	GO:BP	negative regulation of cellular macromolecule biosynthetic process	11578	29383	2.02678
92	0.000112446	214	297	19	0.0639731	0.088785	GO:0006364	GO:BP	rRNA processing	11578	2395	3.46112
93	0.000122429	967	297	49	0.164983	0.0506722	GO:0031327	GO:BP	negative regulation of cellular biosynthetic process	11578	8324	1.97536
94	0.000125319	1471	297	66	0.222222	0.0448674	GO:0042886	GO:BP	amide transport	11578	12117	1.74907
95	0.00014732	124	297	14	0.047138	0.112903	GO:0043484	GO:BP	regulation of RNA splicing	11578	12459	4.40133
96	0.000173517	221	297	19	0.0639731	0.0859729	GO:0016072	GO:BP	rRNA metabolic process	11578	5719	3.35149
97	0.000173951	447	297	29	0.0976431	0.064877	GO:0019221	GO:BP	cytokine-mediated signaling pathway	11578	6528	2.52911
98	0.000194749	985	297	49	0.164983	0.0497462	GO:0009890	GO:BP	negative regulation of biosynthetic process	11578	4251	1.93926
99	0.00019625	1935	297	80	0.26936	0.0413437	GO:0008104	GO:BP	protein localization	11578	3564	1.61171
100	0.000222696	312	297	23	0.0774411	0.0737179	GO:0009617	GO:BP	response to bacterium	11578	4023	2.87376
101	0.000224213	1624	297	70	0.23569	0.0431034	GO:0071705	GO:BP	nitrogen compound transport	11578	19851	1.68031
102	0.000224666	4657	297	157	0.52862	0.0337127	GO:0050896	GO:BP	response to stimulus	11578	15547	1.31423
103	0.000242564	1442	297	64	0.215488	0.0443828	GO:0015031	GO:BP	protein transport	11578	5392	1.73018
104	0.000244229	432	297	28	0.0942761	0.0648148	GO:0002274	GO:BP	myeloid leukocyte activation	11578	944	2.52669
105	0.000344127	2600	297	99	0.333333	0.0380769	GO:0031326	GO:BP	regulation of cellular biosynthetic process	11578	8323	1.48436
106	0.000344127	2532	297	97	0.326599	0.0383096	GO:0010556	GO:BP	regulation of macromolecule biosynthetic process	11578	4748	1.49343
107	0.000344942	2465	297	95	0.319865	0.0385396	GO:2000112	GO:BP	regulation of cellular macromolecule biosynthetic process	11578	29382	1.50239
108	0.000346456	2132	297	85	0.286195	0.0398687	GO:0033036	GO:BP	macromolecule localization	11578	9271	1.55421
109	0.000384166	814	297	42	0.141414	0.0515971	GO:0042127	GO:BP	regulation of cell population proliferation	11578	11636	2.01142
110	0.000404016	70	297	10	0.03367	0.142857	GO:0042274	GO:BP	ribosomal small subunit biogenesis	11578	11734	5.56902
111	0.000409301	421	297	27	0.0909091	0.064133	GO:0022613	GO:BP	ribonucleoprotein complex biogenesis	11578	7661	2.50011
112	0.00044306	764	297	40	0.13468	0.052356	GO:0009628	GO:BP	response to abiotic stimulus	11578	4031	2.041
113	0.000443436	2964	297	109	0.367003	0.0367746	GO:0006810	GO:BP	transport	11578	2800	1.43359
114	0.000452929	5921	297	188	0.632997	0.0317514	GO:0043170	GO:BP	macromolecule metabolic process	11578	12284	1.23777
115	0.000460936	1414	297	62	0.208754	0.0438472	GO:0009605	GO:BP	response to external stimulus	11578	4012	1.7093
116	0.000460936	3038	297	111	0.373737	0.0365372	GO:0051234	GO:BP	establishment of localization	11578	15832	1.42434
117	0.000474546	1509	297	65	0.218855	0.0430749	GO:0045184	GO:BP	establishment of protein localization	11578	13274	1.6792
118	0.000486232	5221	297	170	0.572391	0.0325608	GO:0044260	GO:BP	cellular macromolecule metabolic process	11578	12804	1.26932
119	0.00048737	285	297	21	0.0707071	0.0736842	GO:1903311	GO:BP	regulation of mRNA metabolic process	11578	26402	2.87244
120	0.000548483	1803	297	74	0.249158	0.0410427	GO:0071702	GO:BP	organic substance transport	11578	19848	1.59997
121	0.000551065	774	297	40	0.13468	0.0516796	GO:1903507	GO:BP	negative regulation of nucleic acid-templated transcription	11578	26586	2.01463
122	0.000551065	774	297	40	0.13468	0.0516796	GO:1902679	GO:BP	negative regulation of RNA biosynthetic process	11578	25852	2.01463
123	0.000627307	125	297	13	0.043771	0.104	GO:0050684	GO:BP	regulation of mRNA processing	11578	15398	4.05425
124	0.000663753	60	297	9	0.030303	0.15	GO:0042255	GO:BP	ribosome assembly	11578	11721	5.84747
125	0.000790901	2660	297	99	0.333333	0.037218	GO:0009889	GO:BP	regulation of biosynthetic process	11578	4250	1.45088
126	0.000865521	148	297	14	0.047138	0.0945946	GO:0009266	GO:BP	response to temperature stimulus	11578	3898	3.6876
127	0.000894076	345	297	23	0.0774411	0.0666667	GO:0043312	GO:BP	neutrophil degranulation	11578	12341	2.59888
128	0.000928488	346	297	23	0.0774411	0.066474	GO:0002283	GO:BP	neutrophil activation involved in immune response	11578	953	2.59137
129	0.00095911	371	297	24	0.0808081	0.06469	GO:0043299	GO:BP	leukocyte degranulation	11578	12328	2.52182
130	0.00104697	349	297	23	0.0774411	0.0659026	GO:0042119	GO:BP	neutrophil activation	11578	11630	2.56909
131	0.00105082	96	297	11	0.037037	0.114583	GO:0002181	GO:BP	cytoplasmic translation	11578	865	4.46682
132	0.00106742	374	297	24	0.0808081	0.0641711	GO:0002275	GO:BP	myeloid cell activation involved in immune response	11578	945	2.50159
133	0.00108402	9045	297	259	0.872054	0.0286346	GO:0009987	GO:BP	cellular process	11578	4314	1.11627
134	0.00109064	3496	297	122	0.410774	0.034897	GO:0048518	GO:BP	positive regulation of biological process	11578	14968	1.3604
135	0.00109239	1275	297	56	0.188552	0.0439216	GO:0006955	GO:BP	immune response	11578	2922	1.7122
136	0.00109437	351	297	23	0.0774411	0.0655271	GO:0036230	GO:BP	granulocyte activation	11578	11022	2.55445
137	0.0011357	352	297	23	0.0774411	0.0653409	GO:0002446	GO:BP	neutrophil mediated immunity	11578	1116	2.5472
138	0.00117169	1372	297	59	0.198653	0.0430029	GO:0046907	GO:BP	intracellular transport	11578	14564	1.67639
139	0.00130311	837	297	41	0.138047	0.0489845	GO:0009607	GO:BP	response to biotic stimulus	11578	4014	1.90957
140	0.00133306	1696	297	69	0.232323	0.040684	GO:0065009	GO:BP	regulation of molecular function	11578	18772	1.58599
141	0.00133306	1348	297	58	0.195286	0.0430267	GO:0050790	GO:BP	regulation of catalytic activity	11578	15459	1.67732
142	0.00145493	2095	297	81	0.272727	0.0386635	GO:0065008	GO:BP	regulation of biological quality	11578	18771	1.50722
143	0.0015019	384	297	24	0.0808081	0.0625	GO:0002444	GO:BP	myeloid leukocyte mediated immunity	11578	1114	2.43645
144	0.00158129	68	297	9	0.030303	0.132353	GO:0051384	GO:BP	response to glucocorticoid	11578	15952	5.15954
145	0.00158129	3564	297	123	0.414141	0.0345118	GO:0051171	GO:BP	regulation of nitrogen compound metabolic process	11578	15780	1.34538
146	0.00161608	2543	297	94	0.316498	0.0369642	GO:0019219	GO:BP	regulation of nucleobase-containing compound metabolic process	11578	6526	1.44098
147	0.00167963	820	297	40	0.13468	0.0487805	GO:0043207	GO:BP	response to external biotic stimulus	11578	12295	1.90162
148	0.00167963	820	297	40	0.13468	0.0487805	GO:0051707	GO:BP	response to other organism	11578	16196	1.90162
149	0.00175339	28	297	6	0.020202	0.214286	GO:0009409	GO:BP	response to cold	11578	3949	8.35354
150	0.00177868	316	297	21	0.0707071	0.0664557	GO:0042110	GO:BP	T cell activation	11578	11625	2.59065
151	0.00191602	70	297	9	0.030303	0.128571	GO:0042273	GO:BP	ribosomal large subunit biogenesis	11578	11733	5.01212
152	0.00198815	183	297	15	0.0505051	0.0819672	GO:0048872	GO:BP	homeostasis of number of cells	11578	15291	3.19534
153	0.00204904	2356	297	88	0.296296	0.0373514	GO:0051252	GO:BP	regulation of RNA metabolic process	11578	15847	1.45608
154	0.00212472	977	297	45	0.151515	0.0460594	GO:0008283	GO:BP	cell population proliferation	11578	3602	1.79554
155	0.00220903	746	297	37	0.124579	0.0495979	GO:0045892	GO:BP	negative regulation of transcription, DNA-templated	11578	13724	1.93348
156	0.00237727	89	297	10	0.03367	0.11236	GO:0048024	GO:BP	regulation of mRNA splicing, via spliceosome	11578	14622	4.38013
157	0.00253176	3209	297	112	0.377104	0.0349018	GO:0048522	GO:BP	positive regulation of cellular process	11578	14972	1.36058
158	0.00262322	478	297	27	0.0909091	0.0564854	GO:0002366	GO:BP	leukocyte activation involved in immune response	11578	1036	2.20198
159	0.00271343	841	297	40	0.13468	0.0475624	GO:0006396	GO:BP	RNA processing	11578	2421	1.85413
160	0.00287469	481	297	27	0.0909091	0.0561331	GO:0002263	GO:BP	cell activation involved in immune response	11578	933	2.18824
161	0.00344173	76	297	9	0.030303	0.118421	GO:0031960	GO:BP	response to corticosteroid	11578	8538	4.61643
162	0.00370687	173	297	14	0.047138	0.0809249	GO:0032496	GO:BP	response to lipopolysaccharide	11578	8867	3.15471
163	0.00381838	311	297	20	0.0673401	0.0643087	GO:0006417	GO:BP	regulation of translation	11578	2440	2.50696
164	0.00404251	5	297	3	0.010101	0.6	GO:0061043	GO:BP	regulation of vascular wound healing	11578	17938	23.3899
165	0.00412332	289	297	19	0.0639731	0.0657439	GO:0051249	GO:BP	regulation of lymphocyte activation	11578	15844	2.56291
166	0.00412332	466	297	26	0.0875421	0.055794	GO:0046649	GO:BP	lymphocyte activation	11578	14387	2.17503
167	0.00412883	33	297	6	0.020202	0.181818	GO:0071385	GO:BP	cellular response to glucocorticoid stimulus	11578	19581	7.08785
168	0.0043964	315	297	20	0.0673401	0.0634921	GO:0010035	GO:BP	response to inorganic substance	11578	4350	2.47512
169	0.00445344	3874	297	129	0.434343	0.0332989	GO:0051716	GO:BP	cellular response to stimulus	11578	16204	1.2981
170	0.00449474	177	297	14	0.047138	0.079096	GO:0002237	GO:BP	response to molecule of bacterial origin	11578	908	3.08341
171	0.00457327	292	297	19	0.0639731	0.0650685	GO:0006979	GO:BP	response to oxidative stress	11578	2942	2.53658
172	0.00458199	1548	297	62	0.208754	0.0400517	GO:1901575	GO:BP	organic substance catabolic process	11578	24874	1.56134
173	0.00470635	22	297	5	0.016835	0.227273	GO:0033119	GO:BP	negative regulation of RNA splicing	11578	9318	8.85981
174	0.00470932	34	297	6	0.020202	0.176471	GO:0071384	GO:BP	cellular response to corticosteroid stimulus	11578	19580	6.87938
175	0.00476667	5908	297	182	0.612795	0.0308057	GO:0050794	GO:BP	regulation of cellular process	11578	15462	1.2009
176	0.00506142	474	297	26	0.0875421	0.0548523	GO:0045055	GO:BP	regulated exocytosis	11578	13210	2.13832
177	0.00506448	639	297	32	0.107744	0.0500782	GO:0044092	GO:BP	negative regulation of molecular function	11578	12734	1.95221
178	0.00532635	3636	297	122	0.410774	0.0335534	GO:0019538	GO:BP	protein metabolic process	11578	6824	1.30802
179	0.0054331	119	297	11	0.037037	0.092437	GO:0034341	GO:BP	response to interferon-gamma	11578	9922	3.60349
180	0.0054331	3675	297	123	0.414141	0.0334694	GO:0080090	GO:BP	regulation of primary metabolic process	11578	21057	1.30474
181	0.00547787	65	297	8	0.026936	0.123077	GO:1903312	GO:BP	negative regulation of mRNA metabolic process	11578	26403	4.79793
182	0.00547787	65	297	8	0.026936	0.123077	GO:0045598	GO:BP	regulation of fat cell differentiation	11578	13450	4.79793
183	0.00549305	451	297	25	0.0841751	0.0554324	GO:0010942	GO:BP	positive regulation of cell death	11578	5105	2.16093
184	0.00603067	66	297	8	0.026936	0.121212	GO:0051592	GO:BP	response to calcium ion	11578	16095	4.72523
185	0.00605342	647	297	32	0.107744	0.049459	GO:0002520	GO:BP	immune system development	11578	1189	1.92807
186	0.00611145	36	297	6	0.020202	0.166667	GO:0043392	GO:BP	negative regulation of DNA binding	11578	12387	6.49719
187	0.00637953	142	297	12	0.040404	0.084507	GO:0050870	GO:BP	positive regulation of T cell activation	11578	15526	3.29435
188	0.00643428	327	297	20	0.0673401	0.0611621	GO:0002694	GO:BP	regulation of leukocyte activation	11578	1363	2.38429
189	0.0066335	3404	297	115	0.387205	0.0337838	GO:0044267	GO:BP	cellular protein metabolic process	11578	12808	1.317
190	0.00686515	123	297	11	0.037037	0.0894309	GO:1903708	GO:BP	positive regulation of hemopoiesis	11578	26782	3.4863
191	0.00733037	257	297	17	0.0572391	0.0661479	GO:0070482	GO:BP	response to oxygen levels	11578	19044	2.57865
192	0.00737884	1042	297	45	0.151515	0.0431862	GO:0042592	GO:BP	homeostatic process	11578	11925	1.68353
193	0.00756119	6197	297	188	0.632997	0.0303373	GO:0006807	GO:BP	nitrogen compound metabolic process	11578	2797	1.18264
194	0.00769319	601	297	30	0.10101	0.0499168	GO:0048534	GO:BP	hematopoietic or lymphoid organ development	11578	14982	1.94592
195	0.00769319	167	297	13	0.043771	0.0778443	GO:0022409	GO:BP	positive regulation of cell-cell adhesion	11578	7640	3.03462
196	0.00769319	189	297	14	0.047138	0.0740741	GO:0010038	GO:BP	response to metal ion	11578	4353	2.88764
197	0.0078218	146	297	12	0.040404	0.0821918	GO:0000302	GO:BP	response to reactive oxygen species	11578	136	3.2041
198	0.00800112	106	297	10	0.03367	0.0943396	GO:0071346	GO:BP	cellular response to interferon-gamma	11578	19542	3.67766
199	0.00808014	3826	297	126	0.424242	0.0329326	GO:0031323	GO:BP	regulation of cellular metabolic process	11578	8320	1.28382
200	0.00848986	467	297	25	0.0841751	0.0535332	GO:0033993	GO:BP	response to lipid	11578	9700	2.08689
201	0.00859373	6737	297	201	0.676768	0.0298352	GO:0044237	GO:BP	cellular metabolic process	11578	12789	1.16307
202	0.00863115	238	297	16	0.0538721	0.0672269	GO:0036293	GO:BP	response to decreased oxygen levels	11578	11071	2.62072
203	0.00906998	108	297	10	0.03367	0.0925926	GO:0022904	GO:BP	respiratory electron transport chain	11578	7672	3.60955
204	0.00919259	364	297	21	0.0707071	0.0576923	GO:0034470	GO:BP	ncRNA processing	11578	10005	2.24903
205	0.00931211	15	297	4	0.013468	0.266667	GO:1900153	GO:BP	positive regulation of nuclear-transcribed mRNA catabolic process, deadenylation-dependent decay	11578	23511	10.3955
206	0.00957827	905	297	40	0.13468	0.0441989	GO:1901700	GO:BP	response to oxygen-containing compound	11578	24977	1.72301
207	0.00957827	55	297	7	0.023569	0.127273	GO:0033077	GO:BP	T cell differentiation in thymus	11578	9300	4.96149
208	0.00962299	241	297	16	0.0538721	0.06639	GO:0030098	GO:BP	lymphocyte differentiation	11578	7761	2.58809
209	0.00965935	1279	297	52	0.175084	0.0406568	GO:0006357	GO:BP	regulation of transcription by RNA polymerase II	11578	2389	1.58493
210	0.0105991	27	297	5	0.016835	0.185185	GO:0050686	GO:BP	negative regulation of mRNA processing	11578	15400	7.2191
211	0.0105991	27	297	5	0.016835	0.185185	GO:0000027	GO:BP	ribosomal large subunit assembly	11578	14	7.2191
212	0.0105991	7	297	3	0.010101	0.428571	GO:0007253	GO:BP	cytoplasmic sequestering of NF-kappaB	11578	3181	16.7071
213	0.0108848	344	297	20	0.0673401	0.0581395	GO:0050865	GO:BP	regulation of cell activation	11578	15521	2.26646
214	0.0109935	153	297	12	0.040404	0.0784314	GO:1903039	GO:BP	positive regulation of leukocyte cell-cell adhesion	11578	26175	3.0575
215	0.0109935	92	297	9	0.030303	0.0978261	GO:0042775	GO:BP	mitochondrial ATP synthesis coupled electron transport	11578	12041	3.81357
216	0.0110816	198	297	14	0.047138	0.0707071	GO:1903037	GO:BP	regulation of leukocyte cell-cell adhesion	11578	26173	2.75639
217	0.0110816	245	297	16	0.0538721	0.0653061	GO:0010948	GO:BP	negative regulation of cell cycle process	11578	5109	2.54584
218	0.011283	112	297	10	0.03367	0.0892857	GO:0002262	GO:BP	myeloid cell homeostasis	11578	932	3.48064
219	0.0112915	57	297	7	0.023569	0.122807	GO:0000381	GO:BP	regulation of alternative mRNA splicing, via spliceosome	11578	164	4.78741
220	0.0113268	176	297	13	0.043771	0.0738636	GO:0030217	GO:BP	T cell differentiation	11578	7816	2.87944
221	0.0115799	93	297	9	0.030303	0.0967742	GO:0042773	GO:BP	ATP synthesis coupled electron transport	11578	12039	3.77256
222	0.0120662	28	297	5	0.016835	0.178571	GO:0071353	GO:BP	cellular response to interleukin-4	11578	19549	6.96128
223	0.0120692	2	297	2	0.00673401	1	GO:2000120	GO:BP	positive regulation of sodium-dependent phosphate transport	11578	29390	38.9832
224	0.0120692	2	297	2	0.00673401	1	GO:0035470	GO:BP	positive regulation of vascular wound healing	11578	10482	38.9832
225	0.012266	94	297	9	0.030303	0.0957447	GO:0071248	GO:BP	cellular response to metal ion	11578	19450	3.73243
226	0.012266	178	297	13	0.043771	0.0730337	GO:0070661	GO:BP	leukocyte proliferation	11578	19152	2.84709
227	0.0134806	514	297	26	0.0875421	0.0505837	GO:0010608	GO:BP	posttranscriptional regulation of gene expression	11578	4795	1.97191
228	0.0137471	227	297	15	0.0505051	0.0660793	GO:0001666	GO:BP	response to hypoxia	11578	502	2.57598
229	0.013777	17	297	4	0.013468	0.235294	GO:0045577	GO:BP	regulation of B cell differentiation	11578	13429	9.17251
230	0.013777	17	297	4	0.013468	0.235294	GO:1900151	GO:BP	regulation of nuclear-transcribed mRNA catabolic process, deadenylation-dependent decay	11578	23509	9.17251
231	0.013777	17	297	4	0.013468	0.235294	GO:0051131	GO:BP	chaperone-mediated protein complex assembly	11578	15741	9.17251
232	0.013777	29	297	5	0.016835	0.172414	GO:0070670	GO:BP	response to interleukin-4	11578	19161	6.72124
233	0.0139055	516	297	26	0.0875421	0.0503876	GO:0002443	GO:BP	leukocyte mediated immunity	11578	1113	1.96427
234	0.0139238	777	297	35	0.117845	0.045045	GO:0002252	GO:BP	immune effector process	11578	922	1.756
235	0.014182	2139	297	77	0.259259	0.0359981	GO:1903506	GO:BP	regulation of nucleic acid-templated transcription	11578	26585	1.40332
236	0.0144506	355	297	20	0.0673401	0.056338	GO:0034248	GO:BP	regulation of cellular amide metabolic process	11578	9864	2.19623
237	0.0144506	329	297	19	0.0639731	0.0577508	GO:0002521	GO:BP	leukocyte differentiation	11578	1190	2.25131
238	0.0144506	2141	297	77	0.259259	0.0359645	GO:2001141	GO:BP	regulation of RNA biosynthetic process	11578	30362	1.40201
239	0.0144844	97	297	9	0.030303	0.0927835	GO:1902107	GO:BP	positive regulation of leukocyte differentiation	11578	25369	3.61699
240	0.0144844	8	297	3	0.010101	0.375	GO:0061042	GO:BP	vascular wound healing	11578	17937	14.6187
241	0.0144844	8	297	3	0.010101	0.375	GO:0032071	GO:BP	regulation of endodeoxyribonuclease activity	11578	8579	14.6187
242	0.0144844	8	297	3	0.010101	0.375	GO:1904667	GO:BP	negative regulation of ubiquitin protein ligase activity	11578	27651	14.6187
243	0.0153278	30	297	5	0.016835	0.166667	GO:1903428	GO:BP	positive regulation of reactive oxygen species biosynthetic process	11578	26513	6.49719
244	0.016111	2393	297	84	0.282828	0.0351024	GO:0006950	GO:BP	response to stress	11578	2918	1.3684
245	0.0164373	18	297	4	0.013468	0.222222	GO:0048025	GO:BP	negative regulation of mRNA splicing, via spliceosome	11578	14623	8.66293
246	0.0164847	524	297	26	0.0875421	0.0496183	GO:0000122	GO:BP	negative regulation of transcription by RNA polymerase II	11578	64	1.93428
247	0.0167636	414	297	22	0.0740741	0.0531401	GO:0043065	GO:BP	positive regulation of apoptotic process	11578	12222	2.07157
248	0.0168234	258	297	16	0.0538721	0.0620155	GO:0002683	GO:BP	negative regulation of immune system process	11578	1352	2.41756
249	0.0174655	31	297	5	0.016835	0.16129	GO:0045600	GO:BP	positive regulation of fat cell differentiation	11578	13452	6.28761
250	0.0187691	212	297	14	0.047138	0.0660377	GO:0042493	GO:BP	response to drug	11578	11889	2.57436
251	0.0191923	4184	297	133	0.447811	0.0317878	GO:1901564	GO:BP	organonitrogen compound metabolic process	11578	24864	1.23919
252	0.0191923	419	297	22	0.0740741	0.052506	GO:0043068	GO:BP	positive regulation of programmed cell death	11578	12225	2.04685
253	0.0192065	287	297	17	0.0572391	0.0592334	GO:0009991	GO:BP	response to extracellular stimulus	11578	4318	2.30911
254	0.0196036	64	297	7	0.023569	0.109375	GO:1903313	GO:BP	positive regulation of mRNA metabolic process	11578	26404	4.26378
255	0.0196036	19	297	4	0.013468	0.210526	GO:0021955	GO:BP	central nervous system neuron axonogenesis	11578	7547	8.20698
256	0.0198292	167	297	12	0.040404	0.0718563	GO:0045333	GO:BP	cellular respiration	11578	13338	2.80119
257	0.0198292	123	297	10	0.03367	0.0813008	GO:0042098	GO:BP	T cell proliferation	11578	11617	3.16936
258	0.0199	214	297	14	0.047138	0.0654206	GO:0050863	GO:BP	regulation of T cell activation	11578	15519	2.5503
259	0.0202508	890	297	38	0.127946	0.0426966	GO:0002682	GO:BP	regulation of immune system process	11578	1351	1.66445
260	0.0208189	9411	297	261	0.878788	0.0277335	GO:0008150	GO:BP	biological_process	11578	3565	1.08114
261	0.0211091	146	297	11	0.037037	0.0753425	GO:0022900	GO:BP	electron transport chain	11578	7671	2.93709
262	0.0213232	1667	297	62	0.208754	0.0371926	GO:0044248	GO:BP	cellular catabolic process	11578	12796	1.44988
263	0.021961	7098	297	207	0.69697	0.0291631	GO:0008152	GO:BP	metabolic process	11578	3566	1.13687
264	0.0224107	170	297	12	0.040404	0.0705882	GO:0032943	GO:BP	mononuclear cell proliferation	11578	9202	2.75175
265	0.0224107	170	297	12	0.040404	0.0705882	GO:0046651	GO:BP	lymphocyte proliferation	11578	14388	2.75175
266	0.0225086	66	297	7	0.023569	0.106061	GO:0060333	GO:BP	interferon-gamma-mediated signaling pathway	11578	17259	4.13458
267	0.0229119	126	297	10	0.03367	0.0793651	GO:0051651	GO:BP	maintenance of location in cell	11578	16150	3.0939
268	0.0244105	67	297	7	0.023569	0.104478	GO:0000380	GO:BP	alternative mRNA splicing, via spliceosome	11578	163	4.07287
269	0.0248657	34	297	5	0.016835	0.147059	GO:0071277	GO:BP	cellular response to calcium ion	11578	19475	5.73282
270	0.0266778	10	297	3	0.010101	0.3	GO:0035994	GO:BP	response to muscle stretch	11578	10880	11.6949
271	0.0266778	10	297	3	0.010101	0.3	GO:0032070	GO:BP	regulation of deoxyribonuclease activity	11578	8578	11.6949
272	0.0267156	222	297	14	0.047138	0.0630631	GO:0007159	GO:BP	leukocyte cell-cell adhesion	11578	3094	2.4584
273	0.0268073	247	297	15	0.0505051	0.0607287	GO:0022407	GO:BP	regulation of cell-cell adhesion	11578	7638	2.3674
274	0.0272052	108	297	9	0.030303	0.0833333	GO:0001649	GO:BP	osteoblast differentiation	11578	492	3.2486
275	0.0273321	490	297	24	0.0808081	0.0489796	GO:0014070	GO:BP	response to organic cyclic compound	11578	5228	1.90938
276	0.027683	3	297	2	0.00673401	0.666667	GO:0002486	GO:BP	antigen processing and presentation of endogenous peptide antigen via MHC class I via ER pathway, TAP-independent	11578	1156	25.9888
277	0.027683	3	297	2	0.00673401	0.666667	GO:1903659	GO:BP	regulation of complement-dependent cytotoxicity	11578	26735	25.9888
278	0.027683	3	297	2	0.00673401	0.666667	GO:1904580	GO:BP	regulation of intracellular mRNA localization	11578	27568	25.9888
279	0.027683	2100	297	74	0.249158	0.0352381	GO:0006355	GO:BP	regulation of transcription, DNA-templated	11578	2387	1.37369
280	0.027683	3	297	2	0.00673401	0.666667	GO:1904582	GO:BP	positive regulation of intracellular mRNA localization	11578	27570	25.9888
281	0.027683	3	297	2	0.00673401	0.666667	GO:1902172	GO:BP	regulation of keratinocyte apoptotic process	11578	25425	25.9888
282	0.027683	3	297	2	0.00673401	0.666667	GO:0097283	GO:BP	keratinocyte apoptotic process	11578	21953	25.9888
283	0.027683	3	297	2	0.00673401	0.666667	GO:2000118	GO:BP	regulation of sodium-dependent phosphate transport	11578	29388	25.9888
284	0.027683	3	297	2	0.00673401	0.666667	GO:0002484	GO:BP	antigen processing and presentation of endogenous peptide antigen via MHC class I via ER pathway	11578	1154	25.9888
285	0.027683	3	297	2	0.00673401	0.666667	GO:1902949	GO:BP	positive regulation of tau-protein kinase activity	11578	26088	25.9888
286	0.027683	3	297	2	0.00673401	0.666667	GO:0044341	GO:BP	sodium-dependent phosphate transport	11578	12840	25.9888
287	0.027683	3	297	2	0.00673401	0.666667	GO:0070427	GO:BP	nucleotide-binding oligomerization domain containing 1 signaling pathway	11578	19013	25.9888
288	0.027683	3	297	2	0.00673401	0.666667	GO:0019064	GO:BP	fusion of virus membrane with host plasma membrane	11578	6478	25.9888
289	0.027827	200	297	13	0.043771	0.065	GO:0007568	GO:BP	aging	11578	3466	2.53391
290	0.0279948	850	297	36	0.121212	0.0423529	GO:0009719	GO:BP	response to endogenous stimulus	11578	4102	1.65105
291	0.0289273	552	297	26	0.0875421	0.0471014	GO:0006887	GO:BP	exocytosis	11578	2864	1.83616
292	0.0289273	6730	297	197	0.6633	0.0292719	GO:0071704	GO:BP	organic substance metabolic process	11578	19850	1.14111
293	0.0289273	438	297	22	0.0740741	0.0502283	GO:0008284	GO:BP	positive regulation of cell population proliferation	11578	3603	1.95806
294	0.0293699	132	297	10	0.03367	0.0757576	GO:0006119	GO:BP	oxidative phosphorylation	11578	2175	2.95327
295	0.0293699	582	297	27	0.0909091	0.0463918	GO:0030097	GO:BP	hemopoiesis	11578	7760	1.8085
296	0.0293833	2954	297	98	0.329966	0.0331754	GO:0007165	GO:BP	signal transduction	11578	3100	1.29328
297	0.0294834	1365	297	52	0.175084	0.0380952	GO:0010628	GO:BP	positive regulation of gene expression	11578	4814	1.48507
298	0.0295065	885	297	37	0.124579	0.0418079	GO:0051240	GO:BP	positive regulation of multicellular organismal process	11578	15838	1.6298
299	0.0295145	2282	297	79	0.265993	0.0346188	GO:0097659	GO:BP	nucleic acid-templated transcription	11578	22117	1.34955
300	0.0295993	22	297	4	0.013468	0.181818	GO:0045429	GO:BP	positive regulation of nitric oxide biosynthetic process	11578	13355	7.08785
301	0.0314027	796	297	34	0.114478	0.0427136	GO:0034622	GO:BP	cellular protein-containing complex assembly	11578	10054	1.66511
302	0.031769	11	297	3	0.010101	0.272727	GO:0021772	GO:BP	olfactory bulb development	11578	7365	10.6318
303	0.031769	180	297	12	0.040404	0.0666667	GO:0001503	GO:BP	ossification	11578	439	2.59888
304	0.031769	11	297	3	0.010101	0.272727	GO:0072575	GO:BP	epithelial cell proliferation involved in liver morphogenesis	11578	20534	10.6318
305	0.031769	11	297	3	0.010101	0.272727	GO:0021988	GO:BP	olfactory lobe development	11578	7580	10.6318
306	0.031769	11	297	3	0.010101	0.272727	GO:0072574	GO:BP	hepatocyte proliferation	11578	20533	10.6318
307	0.031769	11	297	3	0.010101	0.272727	GO:0061158	GO:BP	3'-UTR-mediated mRNA destabilization	11578	18050	10.6318
308	0.0319554	37	297	5	0.016835	0.135135	GO:0021954	GO:BP	central nervous system neuron development	11578	7546	5.268
309	0.0323154	2292	297	79	0.265993	0.0344677	GO:0032774	GO:BP	RNA biosynthetic process	11578	9085	1.34366
310	0.0330601	54	297	6	0.020202	0.111111	GO:0006120	GO:BP	mitochondrial electron transport, NADH to ubiquinone	11578	2176	4.33146
311	0.0338738	23	297	4	0.013468	0.173913	GO:1904407	GO:BP	positive regulation of nitric oxide metabolic process	11578	27411	6.77968
312	0.0345916	136	297	10	0.03367	0.0735294	GO:0070663	GO:BP	regulation of leukocyte proliferation	11578	19154	2.86641
313	0.0349662	1479	297	55	0.185185	0.0371873	GO:0016310	GO:BP	phosphorylation	11578	5827	1.44968
314	0.0349662	1151	297	45	0.151515	0.0390964	GO:0065003	GO:BP	protein-containing complex assembly	11578	18767	1.5241
315	0.0364258	115	297	9	0.030303	0.0782609	GO:0071241	GO:BP	cellular response to inorganic substance	11578	19443	3.05086
316	0.0390698	56	297	6	0.020202	0.107143	GO:0045667	GO:BP	regulation of osteoblast differentiation	11578	13519	4.17677
317	0.0399965	12	297	3	0.010101	0.25	GO:0072576	GO:BP	liver morphogenesis	11578	20535	9.74579
318	0.0399965	12	297	3	0.010101	0.25	GO:0061684	GO:BP	chaperone-mediated autophagy	11578	18475	9.74579
319	0.0399965	12	297	3	0.010101	0.25	GO:0010837	GO:BP	regulation of keratinocyte proliferation	11578	5013	9.74579
320	0.040115	211	297	13	0.043771	0.0616114	GO:0002696	GO:BP	positive regulation of leukocyte activation	11578	1365	2.40181
321	0.0401181	6454	297	189	0.636364	0.0292842	GO:0044238	GO:BP	primary metabolic process	11578	12790	1.14159
322	0.0401181	425	297	21	0.0707071	0.0494118	GO:0034660	GO:BP	ncRNA metabolic process	11578	10082	1.92623
323	0.0409458	96	297	8	0.026936	0.0833333	GO:0034101	GO:BP	erythrocyte homeostasis	11578	9738	3.2486
324	0.0416901	57	297	6	0.020202	0.105263	GO:2000379	GO:BP	positive regulation of reactive oxygen species metabolic process	11578	29644	4.10349
325	0.0429452	40	297	5	0.016835	0.125	GO:0035690	GO:BP	cellular response to drug	11578	10630	4.8729
326	0.0431264	816	297	34	0.114478	0.0416667	GO:0140352	GO:BP	export from cell	11578	23195	1.6243
327	0.043561	848	297	35	0.117845	0.0412736	GO:0046903	GO:BP	secretion	11578	14563	1.60897
328	0.043561	1397	297	52	0.175084	0.0372226	GO:0006366	GO:BP	transcription by RNA polymerase II	11578	2396	1.45106
329	0.0441949	3146	297	102	0.343434	0.0324221	GO:0023052	GO:BP	signaling	11578	7708	1.26392
330	0.044693	58	297	6	0.020202	0.103448	GO:0051208	GO:BP	sequestering of calcium ion	11578	15812	4.03274
331	0.0453173	4	297	2	0.00673401	0.5	GO:0039663	GO:BP	membrane fusion involved in viral entry into host cell	11578	11480	19.4916
332	0.0453173	98	297	8	0.026936	0.0816327	GO:0042129	GO:BP	regulation of T cell proliferation	11578	11638	3.1823
333	0.0453173	41	297	5	0.016835	0.121951	GO:2000059	GO:BP	negative regulation of ubiquitin-dependent protein catabolic process	11578	29329	4.75404
334	0.0453173	4	297	2	0.00673401	0.5	GO:0044800	GO:BP	multi-organism membrane fusion	11578	13109	19.4916
335	0.0453173	4	297	2	0.00673401	0.5	GO:0070221	GO:BP	sulfide oxidation, using sulfide:quinone oxidoreductase	11578	18883	19.4916
336	0.0453173	4	297	2	0.00673401	0.5	GO:1902255	GO:BP	positive regulation of intrinsic apoptotic signaling pathway by p53 class mediator	11578	25506	19.4916
337	0.0453173	4	297	2	0.00673401	0.5	GO:0019418	GO:BP	sulfide oxidation	11578	6712	19.4916
338	0.0453173	4	297	2	0.00673401	0.5	GO:0002885	GO:BP	positive regulation of hypersensitivity	11578	1547	19.4916
339	0.0453173	4	297	2	0.00673401	0.5	GO:0090195	GO:BP	chemokine secretion	11578	21414	19.4916
340	0.0453173	4	297	2	0.00673401	0.5	GO:0090196	GO:BP	regulation of chemokine secretion	11578	21415	19.4916
341	0.0453173	4	297	2	0.00673401	0.5	GO:0090197	GO:BP	positive regulation of chemokine secretion	11578	21416	19.4916
342	0.0453173	4	297	2	0.00673401	0.5	GO:0010966	GO:BP	regulation of phosphate transport	11578	5126	19.4916
343	0.0453173	4	297	2	0.00673401	0.5	GO:0097278	GO:BP	complement-dependent cytotoxicity	11578	21948	19.4916
344	0.0453173	216	297	13	0.043771	0.0601852	GO:0050867	GO:BP	positive regulation of cell activation	11578	15523	2.34621
345	0.0453173	1604	297	58	0.195286	0.0361596	GO:0032268	GO:BP	regulation of cellular protein metabolic process	11578	8707	1.40962
346	0.0453173	4	297	2	0.00673401	0.5	GO:1901897	GO:BP	regulation of relaxation of cardiac muscle	11578	25172	19.4916
347	0.0460531	59	297	6	0.020202	0.101695	GO:0042102	GO:BP	positive regulation of T cell proliferation	11578	11619	3.96439
348	0.0460531	59	297	6	0.020202	0.101695	GO:1990266	GO:BP	neutrophil migration	11578	28957	3.96439
349	0.0460531	2615	297	87	0.292929	0.0332696	GO:0034654	GO:BP	nucleobase-containing compound biosynthetic process	11578	10078	1.29695
350	0.0464392	13	297	3	0.010101	0.230769	GO:0042994	GO:BP	cytoplasmic sequestering of transcription factor	11578	12172	8.99611
351	0.0464392	144	297	10	0.03367	0.0694444	GO:0006986	GO:BP	response to unfolded protein	11578	2947	2.70716
352	0.0477554	79	297	7	0.023569	0.0886076	GO:1903707	GO:BP	negative regulation of hemopoiesis	11578	26781	3.4542
353	0.0482829	122	297	9	0.030303	0.0737705	GO:0045444	GO:BP	fat cell differentiation	11578	13359	2.87581
354	0.0488942	42	297	5	0.016835	0.119048	GO:0046686	GO:BP	response to cadmium ion	11578	14418	4.64085
355	0.0490112	796	297	33	0.111111	0.0414573	GO:0032940	GO:BP	secretion by cell	11578	9200	1.61614
356	0.049108	60	297	6	0.020202	0.1	GO:0001776	GO:BP	leukocyte homeostasis	11578	568	3.89832
357	0.0494728	194	297	12	0.040404	0.0618557	GO:0051235	GO:BP	maintenance of location	11578	15833	2.41133
358	0.0494728	194	297	12	0.040404	0.0618557	GO:0051251	GO:BP	positive regulation of lymphocyte activation	11578	15846	2.41133

## Sheet: T cells 2
	p_value	term_size	query_size	intersection_size	precision	recall	term_id	source	term_name	effective_domain_size	source_order	foldenrichment
1	2.65683e-41	121	806	64	0.0794045	0.528926	GO:0000184	GO:BP	nuclear-transcribed mRNA catabolic process, nonsense-mediated decay	12913	79	8.47397
2	1.29174e-40	96	806	57	0.0707196	0.59375	GO:0006614	GO:BP	SRP-dependent cotranslational protein targeting to membrane	12913	2620	9.51252
3	3.09866e-40	189	806	77	0.0955335	0.407407	GO:0006413	GO:BP	translational initiation	12913	2437	6.52711
4	1.62011e-39	100	806	57	0.0707196	0.57	GO:0006613	GO:BP	cotranslational protein targeting to membrane	12913	2619	9.13202
5	5.33479e-39	110	806	59	0.073201	0.536364	GO:0045047	GO:BP	protein targeting to ER	12913	13202	8.59313
6	3.0132e-38	113	806	59	0.073201	0.522124	GO:0072599	GO:BP	establishment of protein localization to endoplasmic reticulum	12913	20550	8.36499
7	3.0132e-38	135	806	64	0.0794045	0.474074	GO:0070972	GO:BP	protein localization to endoplasmic reticulum	12913	19336	7.59518
8	5.45218e-37	203	806	76	0.0942928	0.374384	GO:0000956	GO:BP	nuclear-transcribed mRNA catabolic process	12913	338	5.99804
9	3.02394e-35	585	806	128	0.158809	0.218803	GO:0006412	GO:BP	translation	12913	2436	3.50547
10	4.50896e-34	600	806	128	0.158809	0.213333	GO:0043043	GO:BP	peptide biosynthetic process	12913	12201	3.41783
11	1.83152e-33	1458	806	215	0.266749	0.147462	GO:0044419	GO:BP	interspecies interaction between organisms	12913	12890	2.36251
12	3.52689e-33	762	806	145	0.179901	0.190289	GO:0016071	GO:BP	mRNA metabolic process	12913	5718	3.04863
13	2.5959e-32	813	806	149	0.184864	0.183272	GO:0044403	GO:BP	symbiotic process	12913	12878	2.93621
14	2.5959e-32	785	806	146	0.181141	0.185987	GO:0016032	GO:BP	viral process	12913	5689	2.97972
15	8.6599e-32	178	806	66	0.0818859	0.370787	GO:0006612	GO:BP	protein targeting to membrane	12913	2618	5.9404
16	9.51931e-32	375	806	96	0.119107	0.256	GO:0006401	GO:BP	RNA catabolic process	12913	2426	4.1014
17	1.7731e-31	690	806	134	0.166253	0.194203	GO:0006518	GO:BP	peptide metabolic process	12913	2526	3.11134
18	1.91784e-31	342	806	91	0.112903	0.266082	GO:0006402	GO:BP	mRNA catabolic process	12913	2427	4.26292
19	5.37163e-31	189	806	67	0.0831266	0.354497	GO:0019080	GO:BP	viral gene expression	12913	6492	5.67943
20	5.07002e-30	172	806	63	0.0781638	0.366279	GO:0019083	GO:BP	viral transcription	12913	6495	5.86819
21	1.76498e-28	474	806	104	0.129032	0.219409	GO:0034655	GO:BP	nucleobase-containing compound catabolic process	12913	10079	3.51518
22	6.64485e-28	700	806	129	0.16005	0.184286	GO:0043604	GO:BP	amide biosynthetic process	12913	12533	2.95246
23	2.9289e-27	498	806	105	0.130273	0.210843	GO:0019439	GO:BP	aromatic compound catabolic process	12913	6730	3.37794
24	2.99993e-27	490	806	104	0.129032	0.212245	GO:0046700	GO:BP	heterocycle catabolic process	12913	14427	3.40039
25	5.91138e-27	494	806	104	0.129032	0.210526	GO:0044270	GO:BP	cellular nitrogen compound catabolic process	12913	12810	3.37286
26	1.27151e-26	507	806	105	0.130273	0.207101	GO:1901361	GO:BP	organic cyclic compound catabolic process	12913	24677	3.31798
27	9.15882e-26	4026	806	396	0.491315	0.0983607	GO:0010467	GO:BP	gene expression	12913	4689	1.57585
28	1.25089e-25	290	806	76	0.0942928	0.262069	GO:0090150	GO:BP	establishment of protein localization to membrane	12913	21370	4.19863
29	2.20702e-25	880	806	143	0.177419	0.1625	GO:0043603	GO:BP	cellular amide metabolic process	12913	12532	2.60343
30	3.26735e-25	3413	806	351	0.435484	0.102842	GO:0048519	GO:BP	negative regulation of biological process	12913	14969	1.64764
31	8.38998e-25	9742	806	725	0.899504	0.07442	GO:0009987	GO:BP	cellular process	12913	4314	1.19229
32	2.92428e-24	381	806	86	0.1067	0.225722	GO:0006605	GO:BP	protein targeting	12913	2611	3.61631
33	5.28338e-24	4205	806	403	0.5	0.0958383	GO:0060255	GO:BP	regulation of macromolecule metabolic process	12913	17183	1.53543
34	5.62146e-24	4547	806	426	0.528536	0.0936881	GO:0019222	GO:BP	regulation of metabolic process	12913	6529	1.50099
35	7.25194e-24	1004	806	152	0.188586	0.151394	GO:0044265	GO:BP	cellular macromolecule catabolic process	12913	12807	2.4255
36	1.02463e-23	497	806	99	0.122829	0.199195	GO:0072594	GO:BP	establishment of protein localization to organelle	12913	20545	3.19132
37	1.21862e-23	3243	806	334	0.414392	0.102991	GO:0010468	GO:BP	regulation of gene expression	12913	4690	1.65003
38	1.46108e-22	10133	806	738	0.915633	0.0728313	GO:0008150	GO:BP	biological_process	12913	3565	1.16684
39	3.57279e-22	1150	806	162	0.200993	0.14087	GO:0009057	GO:BP	macromolecule catabolic process	12913	3695	2.25688
40	6.91034e-22	1484	806	191	0.236973	0.128706	GO:0010629	GO:BP	negative regulation of gene expression	12913	4815	2.06201
41	2.52163e-20	3283	806	327	0.405707	0.099604	GO:0016070	GO:BP	RNA metabolic process	12913	5717	1.59577
42	2.93371e-20	7194	806	579	0.718362	0.0804837	GO:0044237	GO:BP	cellular metabolic process	12913	12789	1.28944
43	3.74229e-20	1996	806	229	0.284119	0.114729	GO:0010605	GO:BP	negative regulation of macromolecule metabolic process	12913	4792	1.83809
44	4.61888e-20	7572	806	600	0.744417	0.0792393	GO:0008152	GO:BP	metabolic process	12913	3566	1.2695
45	8.14233e-20	6725	806	550	0.682382	0.0817844	GO:0050789	GO:BP	regulation of biological process	12913	15458	1.31028
46	1.18882e-19	2153	806	240	0.297767	0.111472	GO:0009892	GO:BP	negative regulation of metabolic process	12913	4253	1.78591
47	2.24697e-19	4543	806	411	0.509926	0.0904689	GO:0034641	GO:BP	cellular nitrogen compound metabolic process	12913	10069	1.44941
48	2.27569e-19	981	806	140	0.173697	0.142712	GO:0006886	GO:BP	intracellular protein transport	12913	2863	2.28639
49	3.47411e-19	7083	806	569	0.705955	0.0803332	GO:0065007	GO:BP	biological regulation	12913	18770	1.28703
50	4.99563e-19	1523	806	187	0.23201	0.122784	GO:0070727	GO:BP	cellular macromolecule localization	12913	19186	1.96713
51	1.33316e-18	799	806	121	0.150124	0.151439	GO:0033365	GO:BP	protein localization to organelle	12913	9468	2.42622
52	2.01937e-18	2486	806	262	0.325062	0.10539	GO:0051641	GO:BP	cellular localization	12913	16140	1.68847
53	2.1283e-18	2010	806	225	0.279156	0.11194	GO:0051649	GO:BP	establishment of localization in cell	12913	16148	1.79341
54	2.25928e-18	1750	806	204	0.253102	0.116571	GO:0044248	GO:BP	cellular catabolic process	12913	12796	1.8676
55	2.82348e-18	3662	806	347	0.430521	0.094757	GO:0090304	GO:BP	nucleic acid metabolic process	12913	21522	1.51811
56	3.52547e-18	1515	806	184	0.228288	0.121452	GO:0034613	GO:BP	cellular protein localization	12913	10050	1.9458
57	3.52547e-18	4014	806	371	0.460298	0.0924265	GO:0051179	GO:BP	localization	12913	15788	1.48077
58	5.81495e-18	4025	806	371	0.460298	0.0921739	GO:0006139	GO:BP	nucleobase-containing compound metabolic process	12913	2192	1.47673
59	6.49592e-18	481	806	87	0.10794	0.180873	GO:0072657	GO:BP	protein localization to membrane	12913	20566	2.89779
60	7.2462e-18	4133	806	378	0.468983	0.091459	GO:0006725	GO:BP	cellular aromatic compound metabolic process	12913	2726	1.46527
61	1.38457e-17	4118	806	376	0.466501	0.0913065	GO:0046483	GO:BP	heterocycle metabolic process	12913	14282	1.46283
62	3.28631e-17	1632	806	191	0.236973	0.117034	GO:1901575	GO:BP	organic substance catabolic process	12913	24874	1.87502
63	6.18388e-17	4255	806	383	0.475186	0.0900118	GO:1901360	GO:BP	organic cyclic compound metabolic process	12913	24676	1.44209
64	7.87853e-17	1969	806	217	0.269231	0.110208	GO:0009056	GO:BP	catabolic process	12913	3694	1.76566
65	9.13716e-17	3410	806	324	0.401985	0.0950147	GO:0034645	GO:BP	cellular macromolecule biosynthetic process	12913	10073	1.52224
66	1.08318e-16	3428	806	325	0.403226	0.0948075	GO:0048522	GO:BP	positive regulation of cellular process	12913	14972	1.51892
67	1.23686e-16	2444	806	253	0.313896	0.103519	GO:0042221	GO:BP	response to chemical	12913	11708	1.65848
68	1.5752e-16	3394	806	322	0.399504	0.0948733	GO:0044271	GO:BP	cellular nitrogen compound biosynthetic process	12913	12811	1.51997
69	1.65422e-16	1995	806	218	0.270471	0.109273	GO:0002376	GO:BP	immune system process	12913	1046	1.75068
70	1.70965e-16	3739	806	346	0.42928	0.0925381	GO:0048518	GO:BP	positive regulation of biological process	12913	14968	1.48256
71	2.20163e-16	3487	806	328	0.406948	0.0940637	GO:0009059	GO:BP	macromolecule biosynthetic process	12913	3697	1.507
72	2.27202e-16	2272	806	239	0.296526	0.105194	GO:0010604	GO:BP	positive regulation of macromolecule metabolic process	12913	4791	1.68532
73	3.4606e-16	2451	806	252	0.312655	0.102815	GO:0009893	GO:BP	positive regulation of metabolic process	12913	4254	1.64721
74	5.53972e-16	3253	806	310	0.384615	0.0952966	GO:0051234	GO:BP	establishment of localization	12913	15832	1.52676
75	5.82688e-16	1304	806	160	0.198511	0.122699	GO:1901566	GO:BP	organonitrogen compound biosynthetic process	12913	24866	1.96578
76	6.62394e-16	6310	806	511	0.633995	0.0809826	GO:0043170	GO:BP	macromolecule metabolic process	12913	12284	1.29743
77	7.40761e-16	1719	806	194	0.240695	0.112856	GO:0071705	GO:BP	nitrogen compound transport	12913	19851	1.80808
78	8.36246e-16	1610	806	185	0.229529	0.114907	GO:0071310	GO:BP	cellular response to organic substance	12913	19508	1.84093
79	1.03059e-15	849	806	119	0.147643	0.140165	GO:0006396	GO:BP	RNA processing	12913	2421	2.24559
80	1.40429e-15	3176	806	303	0.375931	0.095403	GO:0006810	GO:BP	transport	12913	2800	1.52846
81	1.63811e-15	422	806	76	0.0942928	0.180095	GO:0022613	GO:BP	ribonucleoprotein complex biogenesis	12913	7661	2.88532
82	1.83839e-15	1936	806	210	0.260546	0.108471	GO:0070887	GO:BP	cellular response to chemical stimulus	12913	19275	1.73783
83	2.21469e-15	1540	806	178	0.220844	0.115584	GO:0015833	GO:BP	peptide transport	12913	5545	1.85179
84	2.34337e-15	1432	806	169	0.209677	0.118017	GO:0046907	GO:BP	intracellular transport	12913	14564	1.89076
85	5.23787e-15	1980	806	212	0.263027	0.107071	GO:0010033	GO:BP	response to organic substance	12913	4348	1.71539
86	6.35209e-15	3622	806	332	0.411911	0.0916621	GO:0044267	GO:BP	cellular protein metabolic process	12913	12808	1.46853
87	7.06469e-15	2050	806	217	0.269231	0.105854	GO:0051173	GO:BP	positive regulation of nitrogen compound metabolic process	12913	15782	1.69589
88	8.30131e-15	1561	806	178	0.220844	0.114029	GO:0042886	GO:BP	amide transport	12913	12117	1.82688
89	1.30298e-14	6606	806	524	0.650124	0.0793218	GO:0006807	GO:BP	nitrogen compound metabolic process	12913	2797	1.27082
90	1.30298e-14	1593	806	180	0.223325	0.112994	GO:0045184	GO:BP	establishment of protein localization	12913	13274	1.81029
91	1.39797e-14	2259	806	232	0.287841	0.1027	GO:0033036	GO:BP	macromolecule localization	12913	9271	1.64537
92	1.73458e-14	710	806	103	0.127792	0.14507	GO:0071345	GO:BP	cellular response to cytokine stimulus	12913	19541	2.32419
93	2.27565e-14	2229	806	229	0.284119	0.102737	GO:0044085	GO:BP	cellular component biogenesis	12913	12728	1.64595
94	3.96478e-14	6887	806	539	0.668734	0.0782634	GO:0044238	GO:BP	primary metabolic process	12913	12790	1.25387
95	3.96478e-14	1525	806	173	0.21464	0.113443	GO:0015031	GO:BP	protein transport	12913	5392	1.81747
96	5.39412e-14	7182	806	556	0.689826	0.0774158	GO:0071704	GO:BP	organic substance metabolic process	12913	19850	1.24029
97	5.39412e-14	3936	806	350	0.434243	0.0889228	GO:0080090	GO:BP	regulation of primary metabolic process	12913	21057	1.42464
98	5.73656e-14	3821	806	342	0.424318	0.0895054	GO:0051171	GO:BP	regulation of nitrogen compound metabolic process	12913	15780	1.43397
99	6.2253e-14	1079	806	135	0.167494	0.125116	GO:0010941	GO:BP	regulation of cell death	12913	5104	2.00449
100	6.25594e-14	323	806	62	0.0769231	0.19195	GO:0006417	GO:BP	regulation of translation	12913	2440	3.07526
101	6.25594e-14	1720	806	188	0.233251	0.109302	GO:0032268	GO:BP	regulation of cellular protein metabolic process	12913	8707	1.75114
102	6.25594e-14	297	806	59	0.073201	0.198653	GO:0042254	GO:BP	ribosome biogenesis	12913	11720	3.18264
103	6.51235e-14	96	806	32	0.0397022	0.333333	GO:0002181	GO:BP	cytoplasmic translation	12913	865	5.34036
104	7.91814e-14	4213	806	368	0.456576	0.0873487	GO:1901576	GO:BP	organic substance biosynthetic process	12913	24875	1.39942
105	8.35643e-14	2046	806	213	0.264268	0.104106	GO:0008104	GO:BP	protein localization	12913	3564	1.66788
106	1.34328e-13	4108	806	360	0.44665	0.0876339	GO:0031323	GO:BP	regulation of cellular metabolic process	12913	8320	1.40399
107	1.4968e-13	5579	806	456	0.565757	0.0817351	GO:0044260	GO:BP	cellular macromolecule metabolic process	12913	12804	1.30949
108	1.74144e-13	2165	806	221	0.274194	0.102079	GO:0031325	GO:BP	positive regulation of cellular metabolic process	12913	8322	1.63541
109	1.75367e-13	4249	806	369	0.457816	0.086844	GO:0009058	GO:BP	biosynthetic process	12913	3696	1.39134
110	2.18815e-13	368	806	66	0.0818859	0.179348	GO:0034248	GO:BP	regulation of cellular amide metabolic process	12913	9864	2.87335
111	2.2858e-13	1910	806	201	0.24938	0.105236	GO:0071702	GO:BP	organic substance transport	12913	19848	1.68599
112	3.33012e-13	4147	806	361	0.447891	0.0870509	GO:0044249	GO:BP	cellular biosynthetic process	12913	12797	1.39465
113	3.33257e-13	4326	806	373	0.462779	0.0862228	GO:0071840	GO:BP	cellular component organization or biogenesis	12913	19926	1.38138
114	4.18898e-13	991	806	125	0.155087	0.126135	GO:0042981	GO:BP	regulation of apoptotic process	12913	12160	2.02082
115	4.67401e-13	1004	806	126	0.156328	0.125498	GO:0043067	GO:BP	regulation of programmed cell death	12913	12224	2.01062
116	6.27515e-13	3869	806	341	0.423077	0.0881365	GO:0019538	GO:BP	protein metabolic process	12913	6824	1.41204
117	6.32563e-13	1388	806	158	0.19603	0.113833	GO:0008219	GO:BP	cell death	12913	3595	1.82373
118	7.59679e-13	775	806	105	0.130273	0.135484	GO:0034097	GO:BP	response to cytokine	12913	9737	2.1706
119	9.33043e-13	1821	806	192	0.238213	0.105437	GO:0051246	GO:BP	regulation of protein metabolic process	12913	15841	1.68921
120	1.01341e-12	546	806	83	0.102978	0.152015	GO:0010608	GO:BP	posttranscriptional regulation of gene expression	12913	4795	2.43544
121	4.27521e-12	1444	806	160	0.198511	0.110803	GO:0043933	GO:BP	protein-containing complex subunit organization	12913	12613	1.77519
122	5.84185e-12	4464	806	377	0.467742	0.0844534	GO:1901564	GO:BP	organonitrogen compound metabolic process	12913	24864	1.35304
123	6.86325e-12	1268	806	145	0.179901	0.114353	GO:0006915	GO:BP	apoptotic process	12913	2889	1.83206
124	7.05438e-12	217	806	46	0.057072	0.211982	GO:0006364	GO:BP	rRNA processing	12913	2395	3.39618
125	8.42042e-12	1308	806	148	0.183623	0.11315	GO:0012501	GO:BP	programmed cell death	12913	5159	1.81278
126	9.42799e-12	3018	806	277	0.343672	0.0917826	GO:0048523	GO:BP	negative regulation of cellular process	12913	14973	1.47046
127	9.74863e-12	977	806	120	0.148883	0.122825	GO:0002682	GO:BP	regulation of immune system process	12913	1351	1.96779
128	1.04639e-11	2576	806	245	0.30397	0.0951087	GO:0006950	GO:BP	response to stress	12913	2918	1.52375
129	1.27435e-11	5037	806	413	0.512407	0.0819932	GO:0050896	GO:BP	response to stimulus	12913	15547	1.31362
130	1.54289e-11	1221	806	140	0.173697	0.11466	GO:0065003	GO:BP	protein-containing complex assembly	12913	18767	1.83698
131	1.58365e-11	6392	806	498	0.617866	0.0779099	GO:0050794	GO:BP	regulation of cellular process	12913	15462	1.2482
132	2.23112e-11	224	806	46	0.057072	0.205357	GO:0016072	GO:BP	rRNA metabolic process	12913	5719	3.29005
133	4.4807e-11	617	806	86	0.1067	0.139384	GO:0060548	GO:BP	negative regulation of cell death	12913	17465	2.23309
134	5.82288e-11	1453	806	157	0.194789	0.108052	GO:0010628	GO:BP	positive regulation of gene expression	12913	4814	1.73112
135	1.2825e-10	492	806	73	0.0905707	0.148374	GO:0019221	GO:BP	cytokine-mediated signaling pathway	12913	6528	2.37711
136	1.2825e-10	288	806	52	0.0645161	0.180556	GO:1903311	GO:BP	regulation of mRNA metabolic process	12913	26402	2.8927
137	1.41686e-10	2295	806	220	0.272953	0.0958606	GO:0065008	GO:BP	regulation of biological quality	12913	18771	1.53579
138	1.87542e-10	1374	806	149	0.184864	0.108443	GO:0006955	GO:BP	immune response	12913	2922	1.73737
139	2.11919e-10	836	806	104	0.129032	0.124402	GO:0034622	GO:BP	cellular protein-containing complex assembly	12913	10054	1.99305
140	5.45414e-10	130	806	32	0.0397022	0.246154	GO:2001242	GO:BP	regulation of intrinsic apoptotic signaling pathway	12913	30455	3.94365
141	6.44162e-10	1016	806	118	0.146402	0.116142	GO:0032270	GO:BP	positive regulation of cellular protein metabolic process	12913	8709	1.86072
142	1.64586e-09	971	806	113	0.140199	0.116375	GO:0001775	GO:BP	cell activation	12913	567	1.86445
143	1.689e-09	562	806	77	0.0955335	0.137011	GO:0043069	GO:BP	negative regulation of programmed cell death	12913	12226	2.19506
144	1.68987e-09	467	806	68	0.0843672	0.14561	GO:0001817	GO:BP	regulation of cytokine production	12913	601	2.33284
145	1.77802e-09	552	806	76	0.0942928	0.137681	GO:0043066	GO:BP	negative regulation of apoptotic process	12913	12223	2.2058
146	1.93187e-09	521	806	73	0.0905707	0.140115	GO:0001816	GO:BP	cytokine production	12913	600	2.2448
147	2.14806e-09	1084	806	122	0.151365	0.112546	GO:0051247	GO:BP	positive regulation of protein metabolic process	12913	15842	1.80311
148	2.44981e-09	194	806	39	0.0483871	0.201031	GO:0048872	GO:BP	homeostasis of number of cells	12913	15291	3.22073
149	5.67532e-09	884	806	104	0.129032	0.117647	GO:0045321	GO:BP	leukocyte activation	12913	13330	1.88483
150	5.85391e-09	1542	806	157	0.194789	0.101816	GO:0009605	GO:BP	response to external stimulus	12913	4012	1.6312
151	6.52443e-09	910	806	106	0.131514	0.116484	GO:0009607	GO:BP	response to biotic stimulus	12913	4014	1.86619
152	6.76203e-09	254	806	45	0.0558313	0.177165	GO:0046034	GO:BP	ATP metabolic process	12913	13856	2.83838
153	8.69814e-09	2534	806	230	0.28536	0.0907656	GO:0048583	GO:BP	regulation of response to stimulus	12913	15023	1.45416
154	8.97445e-09	3216	806	278	0.344913	0.0864428	GO:0007165	GO:BP	signal transduction	12913	3100	1.38491
155	1.35137e-08	214	806	40	0.0496278	0.186916	GO:0006403	GO:BP	RNA localization	12913	2428	2.9946
156	1.41358e-08	4143	806	340	0.421836	0.0820661	GO:0016043	GO:BP	cellular component organization	12913	5695	1.31479
157	1.60053e-08	889	806	103	0.127792	0.115861	GO:0051707	GO:BP	response to other organism	12913	16196	1.85621
158	1.60053e-08	889	806	103	0.127792	0.115861	GO:0043207	GO:BP	response to external biotic stimulus	12913	12295	1.85621
159	1.66625e-08	124	806	29	0.0359801	0.233871	GO:0043484	GO:BP	regulation of RNA splicing	12913	12459	3.74687
160	1.69183e-08	2721	806	242	0.300248	0.0889379	GO:0019219	GO:BP	regulation of nucleobase-containing compound metabolic process	12913	6526	1.42488
161	1.73183e-08	132	806	30	0.0372208	0.227273	GO:0006119	GO:BP	oxidative phosphorylation	12913	2175	3.64116
162	2.58766e-08	303	806	49	0.060794	0.161716	GO:0001819	GO:BP	positive regulation of cytokine production	12913	603	2.59087
163	2.65538e-08	2523	806	227	0.281638	0.0899723	GO:0051252	GO:BP	regulation of RNA metabolic process	12913	15847	1.44145
164	3.02402e-08	4199	806	342	0.424318	0.081448	GO:0051716	GO:BP	cellular response to stimulus	12913	16204	1.30489
165	3.42631e-08	962	806	108	0.133995	0.112266	GO:0051240	GO:BP	positive regulation of multicellular organismal process	12913	15838	1.79863
166	3.84814e-08	3450	806	291	0.361042	0.0843478	GO:0007154	GO:BP	cell communication	12913	3089	1.35134
167	3.94153e-08	1997	806	188	0.233251	0.0941412	GO:0022607	GO:BP	cellular component assembly	12913	7655	1.50824
168	4.29712e-08	846	806	98	0.121588	0.115839	GO:0002252	GO:BP	immune effector process	12913	922	1.85587
169	6.91967e-08	2719	806	239	0.296526	0.0879	GO:0010556	GO:BP	regulation of macromolecule biosynthetic process	12913	4748	1.40825
170	7.64564e-08	468	806	64	0.0794045	0.136752	GO:0002274	GO:BP	myeloid leukocyte activation	12913	944	2.19092
171	7.64564e-08	415	806	59	0.073201	0.142169	GO:0006091	GO:BP	generation of precursor metabolites and energy	12913	2150	2.2777
172	7.92495e-08	109	806	26	0.0322581	0.238532	GO:0022904	GO:BP	respiratory electron transport chain	12913	7672	3.82154
173	9.69192e-08	229	806	40	0.0496278	0.174672	GO:0015980	GO:BP	energy derivation by oxidation of organic compounds	12913	5672	2.79844
174	1.03627e-07	461	806	63	0.0781638	0.136659	GO:0006397	GO:BP	mRNA processing	12913	2422	2.18943
175	1.05536e-07	2647	806	233	0.289082	0.0880242	GO:2000112	GO:BP	regulation of cellular macromolecule biosynthetic process	12913	29382	1.41024
176	1.17186e-07	168	806	33	0.0409429	0.196429	GO:0045333	GO:BP	cellular respiration	12913	13338	3.147
177	1.21491e-07	3429	806	287	0.356079	0.0836979	GO:0023052	GO:BP	signaling	12913	7708	1.34093
178	1.29482e-07	369	806	54	0.0669975	0.146341	GO:0034470	GO:BP	ncRNA processing	12913	10005	2.34455
179	1.35025e-07	938	806	104	0.129032	0.110874	GO:0006952	GO:BP	defense response	12913	2919	1.77633
180	1.95535e-07	1516	806	149	0.184864	0.098285	GO:0032879	GO:BP	regulation of localization	12913	9149	1.57463
181	2.05822e-07	2795	806	242	0.300248	0.0865832	GO:0031326	GO:BP	regulation of cellular biosynthetic process	12913	8323	1.38716
182	2.17926e-07	2854	806	246	0.305211	0.0861948	GO:0009889	GO:BP	regulation of biosynthetic process	12913	4250	1.38094
183	2.41303e-07	92	806	23	0.028536	0.25	GO:0042775	GO:BP	mitochondrial ATP synthesis coupled electron transport	12913	12041	4.00527
184	3.00354e-07	93	806	23	0.028536	0.247312	GO:0042773	GO:BP	ATP synthesis coupled electron transport	12913	12039	3.96221
185	3.65956e-07	125	806	27	0.0334988	0.216	GO:0050684	GO:BP	regulation of mRNA processing	12913	15398	3.46056
186	4.15818e-07	885	806	98	0.121588	0.110734	GO:0042127	GO:BP	regulation of cell population proliferation	12913	11636	1.77409
187	4.91325e-07	1485	806	145	0.179901	0.0976431	GO:0050790	GO:BP	regulation of catalytic activity	12913	15459	1.56435
188	4.98884e-07	405	806	56	0.0694789	0.138272	GO:0008380	GO:BP	RNA splicing	12913	3643	2.21526
189	5.34177e-07	2911	806	248	0.307692	0.0851941	GO:0006996	GO:BP	organelle organization	12913	2954	1.3649
190	6.19528e-07	89	806	22	0.0272953	0.247191	GO:0048024	GO:BP	regulation of mRNA splicing, via spliceosome	12913	14622	3.96027
191	6.20736e-07	991	806	106	0.131514	0.106963	GO:0080134	GO:BP	regulation of response to stress	12913	21076	1.71366
192	7.43016e-07	486	806	63	0.0781638	0.12963	GO:0010942	GO:BP	positive regulation of cell death	12913	5105	2.07681
193	8.53114e-07	182	806	33	0.0409429	0.181319	GO:0051236	GO:BP	establishment of RNA localization	12913	15834	2.90492
194	1.03252e-06	230	806	38	0.0471464	0.165217	GO:0097193	GO:BP	intrinsic apoptotic signaling pathway	12913	21907	2.64696
195	1.03252e-06	650	806	77	0.0955335	0.118462	GO:0002684	GO:BP	positive regulation of immune system process	12913	1353	1.89788
196	1.05231e-06	604	806	73	0.0905707	0.120861	GO:0050776	GO:BP	regulation of immune response	12913	15450	1.93632
197	1.09554e-06	70	806	19	0.0235732	0.271429	GO:0042273	GO:BP	ribosomal large subunit biogenesis	12913	11733	4.34858
198	1.10748e-06	1854	806	171	0.212159	0.092233	GO:0065009	GO:BP	regulation of molecular function	12913	18772	1.47767
199	1.28534e-06	1736	806	162	0.200993	0.093318	GO:0035556	GO:BP	intracellular signal transduction	12913	10537	1.49506
200	1.44382e-06	3722	806	301	0.373449	0.0808705	GO:0032501	GO:BP	multicellular organismal process	12913	8871	1.29563
201	1.56372e-06	151	806	29	0.0359801	0.192053	GO:0022900	GO:BP	electron transport chain	12913	7671	3.0769
202	1.76697e-06	118	806	25	0.0310174	0.211864	GO:0002262	GO:BP	myeloid cell homeostasis	12913	932	3.3943
203	1.78139e-06	839	806	92	0.114144	0.109654	GO:0051674	GO:BP	localization of cell	12913	16170	1.75678
204	1.78139e-06	1025	806	107	0.132754	0.10439	GO:0048585	GO:BP	negative regulation of response to stimulus	12913	15025	1.67245
205	1.78139e-06	839	806	92	0.114144	0.109654	GO:0048870	GO:BP	cell motility	12913	15289	1.75678
206	1.83241e-06	179	806	32	0.0397022	0.178771	GO:0050657	GO:BP	nucleic acid transport	12913	15379	2.86411
207	1.83241e-06	179	806	32	0.0397022	0.178771	GO:0050658	GO:BP	RNA transport	12913	15380	2.86411
208	1.85994e-06	1706	806	159	0.19727	0.0932005	GO:0031324	GO:BP	negative regulation of cellular metabolic process	12913	8321	1.49317
209	2.08914e-06	434	806	57	0.0707196	0.131336	GO:0034660	GO:BP	ncRNA metabolic process	12913	10082	2.10415
210	2.36993e-06	664	806	77	0.0955335	0.115964	GO:0048534	GO:BP	hematopoietic or lymphoid organ development	12913	14982	1.85787
211	2.56337e-06	701	806	80	0.0992556	0.114123	GO:0031329	GO:BP	regulation of cellular catabolic process	12913	8326	1.82837
212	2.56337e-06	1173	806	118	0.146402	0.100597	GO:1902531	GO:BP	regulation of intracellular signal transduction	12913	25734	1.61167
213	2.56337e-06	1355	806	132	0.163772	0.097417	GO:0007049	GO:BP	cell cycle	12913	2997	1.56073
214	2.59442e-06	933	806	99	0.122829	0.106109	GO:0043085	GO:BP	positive regulation of catalytic activity	12913	12229	1.69999
215	2.67129e-06	47	806	15	0.0186104	0.319149	GO:2001244	GO:BP	positive regulation of intrinsic apoptotic signaling pathway	12913	30457	5.11311
216	2.71224e-06	643	806	75	0.0930521	0.116641	GO:0030097	GO:BP	hemopoiesis	12913	7760	1.86871
217	2.7934e-06	1240	806	123	0.152605	0.0991935	GO:0045935	GO:BP	positive regulation of nucleobase-containing compound metabolic process	12913	13765	1.58919
218	3.23177e-06	364	806	50	0.0620347	0.137363	GO:1902532	GO:BP	negative regulation of intracellular signal transduction	12913	25735	2.2007
219	3.9601e-06	769	806	85	0.105459	0.110533	GO:0016477	GO:BP	cell migration	12913	5867	1.77086
220	3.99275e-06	818	806	89	0.110422	0.108802	GO:0009894	GO:BP	regulation of catabolic process	12913	4255	1.74313
221	4.08086e-06	1566	806	147	0.182382	0.0938697	GO:0051172	GO:BP	negative regulation of nitrogen compound metabolic process	12913	15781	1.5039
222	4.74563e-06	1732	806	159	0.19727	0.0918014	GO:0007166	GO:BP	cell surface receptor signaling pathway	12913	3101	1.47076
223	4.98744e-06	100	806	22	0.0272953	0.22	GO:0034101	GO:BP	erythrocyte homeostasis	12913	9738	3.52464
224	5.0453e-06	402	806	53	0.0657568	0.131841	GO:0043299	GO:BP	leukocyte degranulation	12913	12328	2.11223
225	5.87909e-06	1389	806	133	0.165012	0.0957523	GO:0048584	GO:BP	positive regulation of response to stimulus	12913	15024	1.53406
226	5.87909e-06	1310	806	127	0.157568	0.0969466	GO:0009891	GO:BP	positive regulation of biosynthetic process	12913	4252	1.55319
227	6.20042e-06	449	806	57	0.0707196	0.126949	GO:0043065	GO:BP	positive regulation of apoptotic process	12913	12222	2.03386
228	6.31342e-06	416	806	54	0.0669975	0.129808	GO:0002444	GO:BP	myeloid leukocyte mediated immunity	12913	1114	2.07966
229	6.3747e-06	977	806	101	0.12531	0.103378	GO:1901700	GO:BP	response to oxygen-containing compound	12913	24977	1.65622
230	6.94791e-06	707	806	79	0.0980149	0.11174	GO:0002520	GO:BP	immune system development	12913	1189	1.79019
231	8.53942e-06	1293	806	125	0.155087	0.0966744	GO:0031328	GO:BP	positive regulation of cellular biosynthetic process	12913	8325	1.54883
232	8.72827e-06	699	806	78	0.0967742	0.111588	GO:1901698	GO:BP	response to nitrogen compound	12913	24975	1.78776
233	8.76816e-06	454	806	57	0.0707196	0.125551	GO:0043068	GO:BP	positive regulation of programmed cell death	12913	12225	2.01146
234	8.76816e-06	302	806	43	0.0533499	0.142384	GO:2001233	GO:BP	regulation of apoptotic signaling pathway	12913	30446	2.28115
235	9.00619e-06	1061	806	107	0.132754	0.100848	GO:0008283	GO:BP	cell population proliferation	12913	3602	1.6157
236	9.19976e-06	922	806	96	0.119107	0.104121	GO:0040011	GO:BP	locomotion	12913	11538	1.66814
237	9.82193e-06	252	806	38	0.0471464	0.150794	GO:0009615	GO:BP	response to virus	12913	4021	2.41588
238	9.94902e-06	490	806	60	0.0744417	0.122449	GO:0007005	GO:BP	mitochondrion organization	12913	2962	1.96177
239	1.01656e-05	73	806	18	0.0223325	0.246575	GO:0006446	GO:BP	regulation of translational initiation	12913	2464	3.95041
240	1.02675e-05	525	806	63	0.0781638	0.12	GO:0045055	GO:BP	regulated exocytosis	12913	13210	1.92253
241	1.09053e-05	3415	806	275	0.341191	0.0805271	GO:0032502	GO:BP	developmental process	12913	8872	1.29013
242	1.10816e-05	369	806	49	0.060794	0.132791	GO:0043312	GO:BP	neutrophil degranulation	12913	12341	2.12746
243	1.27477e-05	186	806	31	0.0384615	0.166667	GO:0071826	GO:BP	ribonucleoprotein complex subunit organization	12913	19913	2.67018
244	1.29428e-05	371	806	49	0.060794	0.132075	GO:0002283	GO:BP	neutrophil activation involved in immune response	12913	953	2.11599
245	1.37243e-05	318	806	44	0.0545906	0.138365	GO:0000398	GO:BP	mRNA splicing, via spliceosome	12913	172	2.21675
246	1.37243e-05	318	806	44	0.0545906	0.138365	GO:0000377	GO:BP	RNA splicing, via transesterification reactions with bulged adenosine as nucleophile	12913	160	2.21675
247	1.49625e-05	406	806	52	0.0645161	0.128079	GO:0002275	GO:BP	myeloid cell activation involved in immune response	12913	945	2.05196
248	1.56728e-05	341	806	46	0.057072	0.134897	GO:0042110	GO:BP	T cell activation	12913	11625	2.1612
249	1.75024e-05	375	806	49	0.060794	0.130667	GO:0042119	GO:BP	neutrophil activation	12913	11630	2.09342
250	1.75748e-05	321	806	44	0.0545906	0.137072	GO:0000375	GO:BP	RNA splicing, via transesterification reactions	12913	158	2.19604
251	1.77023e-05	189	806	31	0.0384615	0.164021	GO:0031334	GO:BP	positive regulation of protein-containing complex assembly	12913	8330	2.6278
252	1.78894e-05	2091	806	182	0.225806	0.0870397	GO:0010646	GO:BP	regulation of cell communication	12913	4832	1.39447
253	1.87189e-05	180	806	30	0.0372208	0.166667	GO:0022618	GO:BP	ribonucleoprotein complex assembly	12913	7666	2.67018
254	1.91404e-05	1157	806	113	0.140199	0.0976664	GO:0044093	GO:BP	positive regulation of molecular function	12913	12735	1.56472
255	2.00285e-05	377	806	49	0.060794	0.129973	GO:0036230	GO:BP	granulocyte activation	12913	11022	2.08232
256	2.00296e-05	291	806	41	0.0508685	0.140893	GO:0002683	GO:BP	negative regulation of immune system process	12913	1352	2.25727
257	2.15002e-05	378	806	49	0.060794	0.12963	GO:0002446	GO:BP	neutrophil mediated immunity	12913	1116	2.07681
258	2.29382e-05	1904	806	168	0.208437	0.0882353	GO:0009966	GO:BP	regulation of signal transduction	12913	4307	1.41363
259	2.33545e-05	1739	806	156	0.193548	0.0897067	GO:0051239	GO:BP	regulation of multicellular organismal process	12913	15837	1.4372
260	2.41141e-05	5	806	5	0.00620347	1	GO:0015988	GO:BP	energy coupled proton transmembrane transport, against electrochemical gradient	12913	5680	16.0211
261	2.41141e-05	5	806	5	0.00620347	1	GO:0015990	GO:BP	electron transport coupled proton transport	12913	5682	16.0211
262	2.63665e-05	1244	806	119	0.147643	0.0956592	GO:0010557	GO:BP	positive regulation of macromolecule biosynthetic process	12913	4749	1.53256
263	2.93038e-05	519	806	61	0.0756824	0.117534	GO:0002366	GO:BP	leukocyte activation involved in immune response	12913	1036	1.88302
264	3.30923e-05	521	806	61	0.0756824	0.117083	GO:0002263	GO:BP	cell activation involved in immune response	12913	933	1.87579
265	3.30923e-05	862	806	89	0.110422	0.103248	GO:0010648	GO:BP	negative regulation of cell communication	12913	4834	1.65415
266	3.51982e-05	965	806	97	0.120347	0.100518	GO:2000113	GO:BP	negative regulation of cellular macromolecule biosynthetic process	12913	29383	1.61041
267	3.53366e-05	2114	806	182	0.225806	0.0860927	GO:0023051	GO:BP	regulation of signaling	12913	7707	1.3793
268	3.59821e-05	864	806	89	0.110422	0.103009	GO:0023057	GO:BP	negative regulation of signaling	12913	7713	1.65032
269	3.84333e-05	454	806	55	0.0682382	0.121145	GO:0097190	GO:BP	apoptotic signaling pathway	12913	21904	1.94088
270	3.84559e-05	177	806	29	0.0359801	0.163842	GO:0006457	GO:BP	protein folding	12913	2471	2.62492
271	4.49858e-05	806	806	84	0.104218	0.104218	GO:0009968	GO:BP	negative regulation of signal transduction	12913	4309	1.66969
272	4.49858e-05	1581	806	143	0.177419	0.0904491	GO:0016310	GO:BP	phosphorylation	12913	5827	1.44909
273	4.78906e-05	708	806	76	0.0942928	0.107345	GO:0032269	GO:BP	negative regulation of cellular protein metabolic process	12913	8708	1.71978
274	4.84947e-05	1597	806	144	0.17866	0.0901691	GO:0033554	GO:BP	cellular response to stress	12913	9586	1.44461
275	5.01265e-05	66	806	16	0.0198511	0.242424	GO:0000380	GO:BP	alternative mRNA splicing, via spliceosome	12913	163	3.8839
276	5.65237e-05	1002	806	99	0.122829	0.0988024	GO:0010558	GO:BP	negative regulation of macromolecule biosynthetic process	12913	4750	1.58292
277	5.72989e-05	171	806	28	0.0347395	0.163743	GO:0007050	GO:BP	cell cycle arrest	12913	2998	2.62334
278	5.89319e-05	241	806	35	0.0434243	0.145228	GO:0007159	GO:BP	leukocyte cell-cell adhesion	12913	3094	2.32671
279	5.93334e-05	326	806	43	0.0533499	0.131902	GO:0043254	GO:BP	regulation of protein-containing complex assembly	12913	12307	2.11321
280	5.93595e-05	461	806	55	0.0682382	0.119306	GO:0045786	GO:BP	negative regulation of cell cycle	12913	13632	1.91141
281	6.08056e-05	473	806	56	0.0694789	0.118393	GO:0030334	GO:BP	regulation of cell migration	12913	7873	1.89679
282	6.46988e-05	474	806	56	0.0694789	0.118143	GO:0008284	GO:BP	positive regulation of cell population proliferation	12913	3603	1.89279
283	7.09137e-05	173	806	28	0.0347395	0.16185	GO:0035966	GO:BP	response to topologically incorrect protein	12913	10858	2.59301
284	7.60779e-05	500	806	58	0.0719603	0.116	GO:2000145	GO:BP	regulation of cell motility	12913	29415	1.85845
285	7.74293e-05	1075	806	104	0.129032	0.0967442	GO:0006928	GO:BP	movement of cell or subcellular component	12913	2900	1.54995
286	7.8235e-05	536	806	61	0.0756824	0.113806	GO:0009790	GO:BP	embryo development	12913	4167	1.8233
287	8.25188e-05	61	806	15	0.0186104	0.245902	GO:0042255	GO:BP	ribosome assembly	12913	11721	3.93961
288	8.57037e-05	467	806	55	0.0682382	0.117773	GO:0010638	GO:BP	positive regulation of organelle organization	12913	4824	1.88685
289	8.75628e-05	574	806	64	0.0794045	0.111498	GO:0080135	GO:BP	regulation of cellular response to stress	12913	21077	1.78632
290	8.75628e-05	54	806	14	0.0173697	0.259259	GO:0006120	GO:BP	mitochondrial electron transport, NADH to ubiquinone	12913	2176	4.15362
291	8.75628e-05	225	806	33	0.0409429	0.146667	GO:0015931	GO:BP	nucleobase-containing compound transport	12913	5628	2.34976
292	0.000106775	979	806	96	0.119107	0.0980592	GO:0045934	GO:BP	negative regulation of nucleobase-containing compound metabolic process	12913	13764	1.57102
293	0.000108176	518	806	59	0.073201	0.1139	GO:0040012	GO:BP	regulation of locomotion	12913	11539	1.8248
294	0.000120393	178	806	28	0.0347395	0.157303	GO:0061013	GO:BP	regulation of mRNA catabolic process	12913	17915	2.52017
295	0.000121073	1557	806	139	0.172457	0.0892742	GO:0051128	GO:BP	regulation of cellular component organization	12913	15738	1.43027
296	0.000123927	1140	806	108	0.133995	0.0947368	GO:0042592	GO:BP	homeostatic process	12913	11925	1.51779
297	0.000125254	18	806	8	0.00992556	0.444444	GO:0042026	GO:BP	protein refolding	12913	11573	7.12049
298	0.000125254	1114	806	106	0.131514	0.0951526	GO:0051254	GO:BP	positive regulation of RNA metabolic process	12913	15849	1.52445
299	0.000125984	509	806	58	0.0719603	0.113949	GO:0033993	GO:BP	response to lipid	12913	9700	1.82559
300	0.000125984	741	806	77	0.0955335	0.103914	GO:0051094	GO:BP	positive regulation of developmental process	12913	15711	1.66481
301	0.000126095	131	806	23	0.028536	0.175573	GO:0034249	GO:BP	negative regulation of cellular amide metabolic process	12913	9865	2.81286
302	0.000126148	359	806	45	0.0558313	0.125348	GO:0044089	GO:BP	positive regulation of cellular component biogenesis	12913	12731	2.00821
303	0.000126148	1477	806	133	0.165012	0.0900474	GO:0006366	GO:BP	transcription by RNA polymerase II	12913	2396	1.44266
304	0.000126148	1036	806	100	0.124069	0.0965251	GO:0031327	GO:BP	negative regulation of cellular biosynthetic process	12913	8324	1.54644
305	0.000126148	71	806	16	0.0198511	0.225352	GO:0042274	GO:BP	ribosomal small subunit biogenesis	12913	11734	3.61039
306	0.000132515	56	806	14	0.0173697	0.25	GO:0000381	GO:BP	regulation of alternative mRNA splicing, via spliceosome	12913	164	4.00527
307	0.00013592	743	806	77	0.0955335	0.103634	GO:0051248	GO:BP	negative regulation of protein metabolic process	12913	15843	1.66033
308	0.000160188	133	806	23	0.028536	0.172932	GO:0007006	GO:BP	mitochondrial membrane organization	12913	2963	2.77056
309	0.000165165	115	806	21	0.0260546	0.182609	GO:0045727	GO:BP	positive regulation of translation	12913	13575	2.92559
310	0.000172616	143	806	24	0.0297767	0.167832	GO:0035967	GO:BP	cellular response to topologically incorrect protein	12913	10859	2.68885
311	0.000180452	134	806	23	0.028536	0.171642	GO:0006405	GO:BP	RNA export from nucleus	12913	2430	2.74989
312	0.000186437	107	806	20	0.0248139	0.186916	GO:1902600	GO:BP	proton transmembrane transport	12913	25784	2.9946
313	0.000191969	663	806	70	0.0868486	0.105581	GO:0098542	GO:BP	defense response to other organism	12913	22200	1.69152
314	0.000193036	2176	806	182	0.225806	0.0836397	GO:0006796	GO:BP	phosphate-containing compound metabolic process	12913	2786	1.34
315	0.000193036	541	806	60	0.0744417	0.110906	GO:0051270	GO:BP	regulation of cellular component movement	12913	15859	1.77683
316	0.000195554	789	806	80	0.0992556	0.101394	GO:0051130	GO:BP	positive regulation of cellular component organization	12913	15740	1.62445
317	0.000201067	135	806	23	0.028536	0.17037	GO:0042098	GO:BP	T cell proliferation	12913	11617	2.72952
318	0.000201597	542	806	60	0.0744417	0.110701	GO:0051050	GO:BP	positive regulation of transport	12913	15681	1.77355
319	0.000201597	530	806	59	0.073201	0.111321	GO:0014070	GO:BP	response to organic cyclic compound	12913	5228	1.78348
320	0.000201597	615	806	66	0.0818859	0.107317	GO:1902533	GO:BP	positive regulation of intracellular signal transduction	12913	25736	1.71934
321	0.0002061	126	806	22	0.0272953	0.174603	GO:0010950	GO:BP	positive regulation of endopeptidase activity	12913	5111	2.79733
322	0.00020731	1089	806	103	0.127792	0.0945822	GO:0010647	GO:BP	positive regulation of cell communication	12913	4833	1.51531
323	0.000212204	300	806	39	0.0483871	0.13	GO:0030099	GO:BP	myeloid cell differentiation	12913	7762	2.08274
324	0.000234486	31	806	10	0.0124069	0.322581	GO:0043331	GO:BP	response to dsRNA	12913	12359	5.16809
325	0.000236987	146	806	24	0.0297767	0.164384	GO:0002221	GO:BP	pattern recognition receptor signaling pathway	12913	893	2.6336
326	0.000245792	1054	806	100	0.124069	0.0948767	GO:0009890	GO:BP	negative regulation of biosynthetic process	12913	4251	1.52003
327	0.000245835	156	806	25	0.0310174	0.160256	GO:0043281	GO:BP	regulation of cysteine-type endopeptidase activity involved in apoptotic process	12913	12321	2.56748
328	0.000246021	1041	806	99	0.122829	0.0951009	GO:0045595	GO:BP	regulation of cell differentiation	12913	13447	1.52362
329	0.000248781	137	806	23	0.028536	0.167883	GO:0010952	GO:BP	positive regulation of peptidase activity	12913	5113	2.68967
330	0.000254236	620	806	66	0.0818859	0.106452	GO:0061024	GO:BP	membrane organization	12913	17920	1.70547
331	0.00025523	1095	806	103	0.127792	0.0940639	GO:0023056	GO:BP	positive regulation of signaling	12913	7712	1.50701
332	0.000266537	119	806	21	0.0260546	0.176471	GO:0017148	GO:BP	negative regulation of translation	12913	5943	2.82725
333	0.000269967	609	806	65	0.0806452	0.106732	GO:0006887	GO:BP	exocytosis	12913	2864	1.70997
334	0.000271066	2449	806	200	0.248139	0.081666	GO:0097659	GO:BP	nucleic acid-templated transcription	12913	22117	1.30838
335	0.00028026	239	806	33	0.0409429	0.138075	GO:0052548	GO:BP	regulation of endopeptidase activity	12913	16809	2.21212
336	0.000281754	697	806	72	0.08933	0.1033	GO:1901701	GO:BP	cellular response to oxygen-containing compound	12913	24978	1.65498
337	0.000287199	501	806	56	0.0694789	0.111776	GO:0046649	GO:BP	lymphocyte activation	12913	14387	1.79078
338	0.000288565	1477	806	131	0.162531	0.0886933	GO:0050793	GO:BP	regulation of developmental process	12913	15461	1.42096
339	0.000291071	93	806	18	0.0223325	0.193548	GO:0030218	GO:BP	erythrocyte differentiation	12913	7817	3.10086
340	0.000293626	15	806	7	0.00868486	0.466667	GO:1900153	GO:BP	positive regulation of nuclear-transcribed mRNA catabolic process, deadenylation-dependent decay	12913	23511	7.47651
341	0.000293626	198	806	29	0.0359801	0.146465	GO:0070661	GO:BP	leukocyte proliferation	12913	19152	2.34652
342	0.000303529	2195	806	182	0.225806	0.0829157	GO:0006793	GO:BP	phosphorus metabolic process	12913	2783	1.3284
343	0.000304653	139	806	23	0.028536	0.165468	GO:0034250	GO:BP	positive regulation of cellular amide metabolic process	12913	9866	2.65097
344	0.000311933	801	806	80	0.0992556	0.0998752	GO:0009628	GO:BP	response to abiotic stimulus	12913	4031	1.60011
345	0.000318851	26	806	9	0.0111663	0.346154	GO:1900101	GO:BP	regulation of endoplasmic reticulum unfolded protein response	12913	23459	5.54576
346	0.000319038	432	806	50	0.0620347	0.115741	GO:0031347	GO:BP	regulation of defense response	12913	8343	1.85429
347	0.000326007	2414	806	197	0.244417	0.0816073	GO:0006351	GO:BP	transcription, DNA-templated	12913	2383	1.30744
348	0.000328553	363	806	44	0.0545906	0.121212	GO:0009792	GO:BP	embryo development ending in birth or egg hatching	12913	4169	1.94195
349	0.000329763	77	806	16	0.0198511	0.207792	GO:0009060	GO:BP	aerobic respiration	12913	3698	3.32906
350	0.000329763	651	806	68	0.0843672	0.104455	GO:0010243	GO:BP	response to organonitrogen compound	12913	4537	1.67348
351	0.000331507	906	806	88	0.109181	0.0971302	GO:0051253	GO:BP	negative regulation of RNA metabolic process	12913	15848	1.55613
352	0.000331992	39	806	11	0.0136476	0.282051	GO:0035722	GO:BP	interleukin-12-mediated signaling pathway	12913	10656	4.51877
353	0.000331992	39	806	11	0.0136476	0.282051	GO:0045646	GO:BP	regulation of erythrocyte differentiation	12913	13498	4.51877
354	0.000333097	2459	806	200	0.248139	0.0813339	GO:0032774	GO:BP	RNA biosynthetic process	12913	9085	1.30306
355	0.000336071	727	806	74	0.0918114	0.101788	GO:0031401	GO:BP	positive regulation of protein modification process	12913	8364	1.63076
356	0.000356719	170	806	26	0.0322581	0.152941	GO:0043487	GO:BP	regulation of RNA stability	12913	12462	2.45028
357	0.000369685	909	806	88	0.109181	0.0968097	GO:0009719	GO:BP	response to endogenous stimulus	12913	4102	1.551
358	0.000374464	543	806	59	0.073201	0.108656	GO:0045597	GO:BP	positive regulation of cell differentiation	12913	13449	1.74078
359	0.000376491	354	806	43	0.0533499	0.121469	GO:1903706	GO:BP	regulation of hemopoiesis	12913	26780	1.94606
360	0.000377443	254	806	34	0.0421836	0.133858	GO:0052547	GO:BP	regulation of peptidase activity	12913	16808	2.14456
361	0.000381643	265	806	35	0.0434243	0.132075	GO:0070482	GO:BP	response to oxygen levels	12913	19044	2.11599
362	0.000392457	2802	806	223	0.276675	0.079586	GO:0034654	GO:BP	nucleobase-containing compound biosynthetic process	12913	10078	1.27505
363	0.000409176	425	806	49	0.060794	0.115294	GO:0098609	GO:BP	cell-cell adhesion	12913	22211	1.84714
364	0.000418767	2849	806	226	0.280397	0.0793261	GO:0019438	GO:BP	aromatic compound biosynthetic process	12913	6729	1.27089
365	0.000420805	152	806	24	0.0297767	0.157895	GO:0006986	GO:BP	response to unfolded protein	12913	2947	2.52965
366	0.000420805	234	806	32	0.0397022	0.136752	GO:0006839	GO:BP	mitochondrial transport	12913	2822	2.19092
367	0.00042269	96	806	18	0.0223325	0.1875	GO:0032273	GO:BP	positive regulation of protein polymerization	12913	8712	3.00395
368	0.00042269	887	806	86	0.1067	0.096956	GO:0051726	GO:BP	regulation of cell cycle	12913	16206	1.55334
369	0.00042269	162	806	25	0.0310174	0.154321	GO:0043488	GO:BP	regulation of mRNA stability	12913	12463	2.47239
370	0.00042269	1840	806	156	0.193548	0.0847826	GO:0048513	GO:BP	animal organ development	12913	14963	1.35831
371	0.000449595	671	806	69	0.0856079	0.102832	GO:0051338	GO:BP	regulation of transferase activity	12913	15918	1.64747
372	0.000454876	684	806	70	0.0868486	0.102339	GO:0055114	GO:BP	oxidation-reduction process	12913	16956	1.63959
373	0.000454876	71	806	15	0.0186104	0.211268	GO:0071357	GO:BP	cellular response to type I interferon	12913	19553	3.38474
374	0.000454876	71	806	15	0.0186104	0.211268	GO:0030838	GO:BP	positive regulation of actin filament polymerization	12913	8073	3.38474
375	0.000454876	246	806	33	0.0409429	0.134146	GO:0036293	GO:BP	response to decreased oxygen levels	12913	11071	2.14917
376	0.000454876	451	806	51	0.0632754	0.113082	GO:0090087	GO:BP	regulation of peptide transport	12913	21312	1.8117
377	0.000454876	71	806	15	0.0186104	0.211268	GO:0060337	GO:BP	type I interferon signaling pathway	12913	17263	3.38474
378	0.000493391	215	806	30	0.0372208	0.139535	GO:1903037	GO:BP	regulation of leukocyte cell-cell adhesion	12913	26173	2.2355
379	0.000499355	34	806	10	0.0124069	0.294118	GO:0002183	GO:BP	cytoplasmic translational initiation	12913	867	4.71209
380	0.000517705	41	806	11	0.0136476	0.268293	GO:0071349	GO:BP	cellular response to interleukin-12	12913	19545	4.29834
381	0.000517705	2233	806	183	0.227047	0.0819525	GO:0048869	GO:BP	cellular developmental process	12913	15288	1.31297
382	0.000543403	98	806	18	0.0223325	0.183673	GO:0043280	GO:BP	positive regulation of cysteine-type endopeptidase activity involved in apoptotic process	12913	12320	2.94265
383	0.000546692	2936	806	231	0.2866	0.0786785	GO:1901362	GO:BP	organic cyclic compound biosynthetic process	12913	24678	1.26052
384	0.000567701	882	806	85	0.105459	0.0963719	GO:0032940	GO:BP	secretion by cell	12913	9200	1.54398
385	0.000578487	2850	806	225	0.279156	0.0789474	GO:0018130	GO:BP	heterocycle biosynthetic process	12913	6066	1.26482
386	0.000593862	186	806	27	0.0334988	0.145161	GO:0046651	GO:BP	lymphocyte proliferation	12913	14388	2.32564
387	0.000593862	186	806	27	0.0334988	0.145161	GO:0032943	GO:BP	mononuclear cell proliferation	12913	9202	2.32564
388	0.000597041	767	806	76	0.0942928	0.0990874	GO:0071495	GO:BP	cellular response to endogenous stimulus	12913	19683	1.58749
389	0.000641405	42	806	11	0.0136476	0.261905	GO:0070671	GO:BP	response to interleukin-12	12913	19162	4.196
390	0.000641405	65	806	14	0.0173697	0.215385	GO:0001776	GO:BP	leukocyte homeostasis	12913	568	3.4507
391	0.000641405	65	806	14	0.0173697	0.215385	GO:1903313	GO:BP	positive regulation of mRNA metabolic process	12913	26404	3.4507
392	0.000641405	65	806	14	0.0173697	0.215385	GO:0032981	GO:BP	mitochondrial respiratory chain complex I assembly	12913	9237	3.4507
393	0.000641405	65	806	14	0.0173697	0.215385	GO:0010257	GO:BP	NADH dehydrogenase complex assembly	12913	4550	3.4507
394	0.000642517	592	806	62	0.0769231	0.10473	GO:0032101	GO:BP	regulation of response to external stimulus	12913	8606	1.67788
395	0.00065905	12	806	6	0.00744417	0.5	GO:0010714	GO:BP	positive regulation of collagen metabolic process	12913	4896	8.01055
396	0.000669176	364	806	43	0.0533499	0.118132	GO:0002521	GO:BP	leukocyte differentiation	12913	1190	1.8926
397	0.000680975	17	806	7	0.00868486	0.411765	GO:1900151	GO:BP	regulation of nuclear-transcribed mRNA catabolic process, deadenylation-dependent decay	12913	23509	6.59692
398	0.000682114	656	806	67	0.0831266	0.102134	GO:0032880	GO:BP	regulation of protein localization	12913	9150	1.6363
399	0.00068508	91	806	17	0.0210918	0.186813	GO:0055076	GO:BP	transition metal ion homeostasis	12913	16930	2.99295
400	0.000686796	993	806	93	0.115385	0.0936556	GO:0009967	GO:BP	positive regulation of signal transduction	12913	4308	1.50046
401	0.000713522	74	806	15	0.0186104	0.202703	GO:0046916	GO:BP	cellular transition metal ion homeostasis	12913	14567	3.24752
402	0.000728922	620	806	64	0.0794045	0.103226	GO:0045937	GO:BP	positive regulation of phosphate metabolic process	12913	13767	1.65379
403	0.000728922	354	806	42	0.0521092	0.118644	GO:0043009	GO:BP	chordate embryonic development	12913	12184	1.90081
404	0.000728922	620	806	64	0.0794045	0.103226	GO:0010562	GO:BP	positive regulation of phosphorus metabolic process	12913	4754	1.65379
405	0.000756852	1170	806	106	0.131514	0.0905983	GO:0031399	GO:BP	regulation of protein modification process	12913	8362	1.45148
406	0.000771187	559	806	59	0.073201	0.105546	GO:0002443	GO:BP	leukocyte mediated immunity	12913	1113	1.69096
407	0.00077606	787	806	77	0.0955335	0.0978399	GO:0000278	GO:BP	mitotic cell cycle	12913	122	1.5675
408	0.000799658	276	806	35	0.0434243	0.126812	GO:1904951	GO:BP	positive regulation of establishment of protein localization	12913	27913	2.03166
409	0.00080324	265	806	34	0.0421836	0.128302	GO:0022407	GO:BP	regulation of cell-cell adhesion	12913	7638	2.05554
410	0.000804021	788	806	77	0.0955335	0.0977157	GO:0051336	GO:BP	regulation of hydrolase activity	12913	15916	1.56551
411	0.000814387	211	806	29	0.0359801	0.137441	GO:0051258	GO:BP	protein polymerization	12913	15853	2.20195
412	0.00081576	3105	806	241	0.299007	0.0776167	GO:0048856	GO:BP	anatomical structure development	12913	15276	1.24351
413	0.00081576	75	806	15	0.0186104	0.2	GO:0034340	GO:BP	response to type I interferon	12913	9921	3.20422
414	0.00081576	648	806	66	0.0818859	0.101852	GO:0060341	GO:BP	regulation of cellular localization	12913	17267	1.63178
415	0.000825916	2824	806	222	0.275434	0.0786119	GO:0007275	GO:BP	multicellular organism development	12913	3201	1.25945
416	0.000874445	150	806	23	0.028536	0.153333	GO:0071897	GO:BP	DNA biosynthetic process	12913	19965	2.45657
417	0.000893729	381	806	44	0.0545906	0.115486	GO:0006954	GO:BP	inflammatory response	12913	2921	1.8502
418	0.000942737	171	806	25	0.0310174	0.146199	GO:2000116	GO:BP	regulation of cysteine-type endopeptidase activity	12913	29386	2.34226
419	0.000958344	141	806	22	0.0272953	0.156028	GO:1903708	GO:BP	positive regulation of hemopoiesis	12913	26782	2.49974
420	0.000962357	192	806	27	0.0334988	0.140625	GO:0051607	GO:BP	defense response to virus	12913	16109	2.25297
421	0.000973268	313	806	38	0.0471464	0.121406	GO:0051249	GO:BP	regulation of lymphocyte activation	12913	15844	1.94505
422	0.000973268	1356	806	119	0.147643	0.0877581	GO:0006357	GO:BP	regulation of transcription by RNA polymerase II	12913	2389	1.40598
423	0.000973678	235	806	31	0.0384615	0.131915	GO:0001666	GO:BP	response to hypoxia	12913	502	2.11342
424	0.000973678	2305	806	186	0.230769	0.0806941	GO:1903506	GO:BP	regulation of nucleic acid-templated transcription	12913	26585	1.29281
425	0.000973678	103	806	18	0.0223325	0.174757	GO:0019079	GO:BP	viral genome replication	12913	6491	2.7998
426	0.00102137	2307	806	186	0.230769	0.0806242	GO:2001141	GO:BP	regulation of RNA biosynthetic process	12913	30362	1.29169
427	0.00102186	132	806	21	0.0260546	0.159091	GO:0008064	GO:BP	regulation of actin polymerization or depolymerization	12913	3553	2.54881
428	0.00102186	132	806	21	0.0260546	0.159091	GO:0030832	GO:BP	regulation of actin filament length	12913	8067	2.54881
429	0.00102186	939	806	88	0.109181	0.0937167	GO:0033043	GO:BP	regulation of organelle organization	12913	9273	1.50144
430	0.00102186	52	806	12	0.0148883	0.230769	GO:0002260	GO:BP	lymphocyte homeostasis	12913	930	3.69718
431	0.00106253	13	806	6	0.00744417	0.461538	GO:1900102	GO:BP	negative regulation of endoplasmic reticulum unfolded protein response	12913	23460	7.39435
432	0.00106473	204	806	28	0.0347395	0.137255	GO:1903320	GO:BP	regulation of protein modification by small protein conjugation or removal	12913	26411	2.19897
433	0.00112179	237	806	31	0.0384615	0.130802	GO:0001701	GO:BP	in utero embryonic development	12913	519	2.09559
434	0.00115885	45	806	11	0.0136476	0.244444	GO:0006754	GO:BP	ATP biosynthetic process	12913	2751	3.91627
435	0.0011607	903	806	85	0.105459	0.0941307	GO:0140352	GO:BP	export from cell	12913	23195	1.50808
436	0.00116299	184	806	26	0.0322581	0.141304	GO:0043903	GO:BP	regulation of symbiotic process	12913	12603	2.26385
437	0.00119665	260	806	33	0.0409429	0.126923	GO:0030098	GO:BP	lymphocyte differentiation	12913	7761	2.03345
438	0.00120907	557	806	58	0.0719603	0.104129	GO:0051704	GO:BP	multi-organism process	12913	16194	1.66826
439	0.00121532	124	806	20	0.0248139	0.16129	GO:0071426	GO:BP	ribonucleoprotein complex export from nucleus	12913	19621	2.58405
440	0.00121532	124	806	20	0.0248139	0.16129	GO:0034620	GO:BP	cellular response to unfolded protein	12913	10053	2.58405
441	0.00124445	684	806	68	0.0843672	0.0994152	GO:0044092	GO:BP	negative regulation of molecular function	12913	12734	1.59274
442	0.00127962	472	806	51	0.0632754	0.108051	GO:0030162	GO:BP	regulation of proteolysis	12913	7779	1.73109
443	0.00135459	125	806	20	0.0248139	0.16	GO:0071166	GO:BP	ribonucleoprotein complex localization	12913	19403	2.56337
444	0.00135793	461	806	50	0.0620347	0.10846	GO:0070201	GO:BP	regulation of establishment of protein localization	12913	18871	1.73765
445	0.00136657	106	806	18	0.0223325	0.169811	GO:0002224	GO:BP	toll-like receptor signaling pathway	12913	896	2.72056
446	0.00137912	145	806	22	0.0272953	0.151724	GO:0060326	GO:BP	cell chemotaxis	12913	17252	2.43079
447	0.00137912	240	806	31	0.0384615	0.129167	GO:0032535	GO:BP	regulation of cellular component size	12913	8894	2.06939
448	0.00140002	548	806	57	0.0707196	0.104015	GO:0045087	GO:BP	innate immune response	12913	13230	1.66643
449	0.00140002	19	806	7	0.00868486	0.368421	GO:0035455	GO:BP	response to interferon-alpha	12913	10471	5.90251
450	0.00144617	54	806	12	0.0148883	0.222222	GO:2000573	GO:BP	positive regulation of DNA biosynthetic process	12913	29832	3.56024
451	0.00145588	637	806	64	0.0794045	0.100471	GO:0044087	GO:BP	regulation of cellular component biogenesis	12913	12729	1.60965
452	0.00146109	1084	806	98	0.121588	0.0904059	GO:0019220	GO:BP	regulation of phosphate metabolic process	12913	6527	1.4484
453	0.00146109	1084	806	98	0.121588	0.0904059	GO:0051174	GO:BP	regulation of phosphorus metabolic process	12913	15783	1.4484
454	0.00146444	230	806	30	0.0372208	0.130435	GO:0050863	GO:BP	regulation of T cell activation	12913	15519	2.08971
455	0.00146444	187	806	26	0.0322581	0.139037	GO:0030217	GO:BP	T cell differentiation	12913	7816	2.22753
456	0.00159074	287	806	35	0.0434243	0.121951	GO:0040017	GO:BP	positive regulation of locomotion	12913	11544	1.95379
457	0.00159427	188	806	26	0.0322581	0.138298	GO:0030522	GO:BP	intracellular receptor signaling pathway	12913	7952	2.21568
458	0.00164266	127	806	20	0.0248139	0.15748	GO:0034341	GO:BP	response to interferon-gamma	12913	9922	2.52301
459	0.00169933	108	806	18	0.0223325	0.166667	GO:2001056	GO:BP	positive regulation of cysteine-type endopeptidase activity	12913	30298	2.67018
460	0.00173528	358	806	41	0.0508685	0.114525	GO:0002694	GO:BP	regulation of leukocyte activation	12913	1363	1.83482
461	0.00175389	942	806	87	0.10794	0.0923567	GO:0046903	GO:BP	secretion	12913	14563	1.47965
462	0.00177066	2173	806	175	0.217122	0.0805338	GO:0030154	GO:BP	cell differentiation	12913	7776	1.29024
463	0.00183381	81	806	15	0.0186104	0.185185	GO:1905897	GO:BP	regulation of response to endoplasmic reticulum stress	12913	28787	2.96687
464	0.00187345	40	806	10	0.0124069	0.25	GO:0045010	GO:BP	actin nucleation	12913	13178	4.00527
465	0.00191996	290	806	35	0.0434243	0.12069	GO:0051272	GO:BP	positive regulation of cellular component movement	12913	15861	1.93358
466	0.00206003	257	806	32	0.0397022	0.124514	GO:1903829	GO:BP	positive regulation of cellular protein localization	12913	26880	1.99484
467	0.00210854	280	806	34	0.0421836	0.121429	GO:0030335	GO:BP	positive regulation of cell migration	12913	7874	1.94542
468	0.00212218	110	806	18	0.0223325	0.163636	GO:0030968	GO:BP	endoplasmic reticulum unfolded protein response	12913	8142	2.62163
469	0.00212537	160	806	23	0.028536	0.14375	GO:0032271	GO:BP	regulation of protein polymerization	12913	8710	2.30303
470	0.00218513	471	806	50	0.0620347	0.106157	GO:0003006	GO:BP	developmental process involved in reproduction	12913	1610	1.70075
471	0.00221821	130	806	20	0.0248139	0.153846	GO:0072655	GO:BP	establishment of protein localization to mitochondrion	12913	20564	2.46478
472	0.00224843	236	806	30	0.0372208	0.127119	GO:0032970	GO:BP	regulation of actin filament-based process	12913	9227	2.03658
473	0.00233585	964	806	88	0.109181	0.0912863	GO:0042325	GO:BP	regulation of phosphorylation	12913	11756	1.46251
474	0.00233915	585	806	59	0.073201	0.100855	GO:0042327	GO:BP	positive regulation of phosphorylation	12913	11758	1.6158
475	0.00240935	27	806	8	0.00992556	0.296296	GO:0000027	GO:BP	ribosomal large subunit assembly	12913	14	4.74699
476	0.00241803	121	806	19	0.0235732	0.157025	GO:0030833	GO:BP	regulation of actin filament polymerization	12913	8068	2.51571
477	0.00241803	498	806	52	0.0645161	0.104418	GO:0051345	GO:BP	positive regulation of hydrolase activity	12913	15925	1.67289
478	0.00245854	34	806	9	0.0111663	0.264706	GO:0110110	GO:BP	positive regulation of animal organ morphogenesis	12913	22898	4.24088
479	0.00249726	15	806	6	0.00744417	0.4	GO:0043558	GO:BP	regulation of translational initiation in response to stress	12913	12505	6.40844
480	0.00249726	102	806	17	0.0210918	0.166667	GO:0033108	GO:BP	mitochondrial respiratory chain complex assembly	12913	9317	2.67018
481	0.00250703	283	806	34	0.0421836	0.120141	GO:2000147	GO:BP	positive regulation of cell motility	12913	29417	1.9248
482	0.00250703	413	806	45	0.0558313	0.108959	GO:1903827	GO:BP	regulation of cellular protein localization	12913	26878	1.74564
483	0.00250703	413	806	45	0.0558313	0.108959	GO:1901699	GO:BP	cellular response to nitrogen compound	12913	24976	1.74564
484	0.00251493	10	806	5	0.00620347	0.5	GO:2001171	GO:BP	positive regulation of ATP biosynthetic process	12913	30391	8.01055
485	0.00254767	677	806	66	0.0818859	0.0974889	GO:0007155	GO:BP	cell adhesion	12913	3090	1.56188
486	0.00262262	2264	806	180	0.223325	0.0795053	GO:0006355	GO:BP	regulation of transcription, DNA-templated	12913	2387	1.27376
487	0.0026275	261	806	32	0.0397022	0.122605	GO:0051222	GO:BP	positive regulation of protein transport	12913	15823	1.96427
488	0.00264652	132	806	20	0.0248139	0.151515	GO:0070585	GO:BP	protein localization to mitochondrion	12913	19099	2.42744
489	0.00264943	75	806	14	0.0173697	0.186667	GO:0009144	GO:BP	purine nucleoside triphosphate metabolic process	12913	3778	2.9906
490	0.00269959	439	806	47	0.0583127	0.107062	GO:0051223	GO:BP	regulation of protein transport	12913	15824	1.71524
491	0.00273727	58	806	12	0.0148883	0.206897	GO:0002753	GO:BP	cytoplasmic pattern recognition receptor signaling pathway	12913	1416	3.31471
492	0.00278515	153	806	22	0.0272953	0.143791	GO:0008154	GO:BP	actin polymerization or depolymerization	12913	3568	2.30369
493	0.00278515	262	806	32	0.0397022	0.122137	GO:0019058	GO:BP	viral life cycle	12913	6473	1.95677
494	0.00279003	174	806	24	0.0297767	0.137931	GO:0050792	GO:BP	regulation of viral process	12913	15460	2.20981
495	0.00283221	680	806	66	0.0818859	0.0970588	GO:0022610	GO:BP	biological adhesion	12913	7658	1.55499
496	0.00296901	263	806	32	0.0397022	0.121673	GO:0045862	GO:BP	positive regulation of proteolysis	12913	13698	1.94933
497	0.00299728	1013	806	91	0.112903	0.0898322	GO:0022402	GO:BP	cell cycle process	12913	7633	1.43921
498	0.00301157	839	806	78	0.0967742	0.0929678	GO:0001932	GO:BP	regulation of protein phosphorylation	12913	677	1.48945
499	0.00305289	345	806	39	0.0483871	0.113043	GO:0009617	GO:BP	response to bacterium	12913	4023	1.81108
500	0.00308545	987	806	89	0.110422	0.0901722	GO:0051049	GO:BP	regulation of transport	12913	15680	1.44466
501	0.00311925	230	806	29	0.0359801	0.126087	GO:0007249	GO:BP	I-kappaB kinase/NF-kappaB signaling	12913	3177	2.02005
502	0.00314205	114	806	18	0.0223325	0.157895	GO:0060485	GO:BP	mesenchyme development	12913	17402	2.52965
503	0.0031571	134	806	20	0.0248139	0.149254	GO:1902905	GO:BP	positive regulation of supramolecular fiber organization	12913	26051	2.39121
504	0.0032061	3	806	3	0.00372208	1	GO:0002484	GO:BP	antigen processing and presentation of endogenous peptide antigen via MHC class I via ER pathway	12913	1154	16.0211
505	0.0032061	3	806	3	0.00372208	1	GO:0002486	GO:BP	antigen processing and presentation of endogenous peptide antigen via MHC class I via ER pathway, TAP-independent	12913	1156	16.0211
506	0.0032061	3	806	3	0.00372208	1	GO:1990428	GO:BP	miRNA transport	12913	29009	16.0211
507	0.0032061	3	806	3	0.00372208	1	GO:1904582	GO:BP	positive regulation of intracellular mRNA localization	12913	27570	16.0211
508	0.0032061	3	806	3	0.00372208	1	GO:1904580	GO:BP	regulation of intracellular mRNA localization	12913	27568	16.0211
509	0.00322722	176	806	24	0.0297767	0.136364	GO:0032388	GO:BP	positive regulation of intracellular transport	12913	8801	2.18469
510	0.00333019	68	806	13	0.016129	0.191176	GO:0009205	GO:BP	purine ribonucleoside triphosphate metabolic process	12913	3838	3.06286
511	0.00333019	220	806	28	0.0347395	0.127273	GO:0032956	GO:BP	regulation of actin cytoskeleton organization	12913	9214	2.03905
512	0.00335559	383	806	42	0.0521092	0.109661	GO:0008285	GO:BP	negative regulation of cell population proliferation	12913	3604	1.75688
513	0.00350884	22	806	7	0.00868486	0.318182	GO:0043555	GO:BP	regulation of translation in response to stress	12913	12502	5.09762
514	0.00351898	336	806	38	0.0471464	0.113095	GO:0071396	GO:BP	cellular response to lipid	12913	19592	1.81191
515	0.00368154	546	806	55	0.0682382	0.100733	GO:0001934	GO:BP	positive regulation of protein phosphorylation	12913	679	1.61385
516	0.00378063	233	806	29	0.0359801	0.124464	GO:0042493	GO:BP	response to drug	12913	11889	1.99404
517	0.00382842	29	806	8	0.00992556	0.275862	GO:2000107	GO:BP	negative regulation of leukocyte apoptotic process	12913	29377	4.41961
518	0.00384488	410	806	44	0.0545906	0.107317	GO:0030155	GO:BP	regulation of cell adhesion	12913	7777	1.71934
519	0.0039427	362	806	40	0.0496278	0.110497	GO:0051493	GO:BP	regulation of cytoskeleton organization	12913	16026	1.77029
520	0.00405567	11	806	5	0.00620347	0.454545	GO:0001731	GO:BP	formation of translation preinitiation complex	12913	536	7.28231
521	0.00405567	11	806	5	0.00620347	0.454545	GO:0032967	GO:BP	positive regulation of collagen biosynthetic process	12913	9225	7.28231
522	0.00405567	11	806	5	0.00620347	0.454545	GO:0019885	GO:BP	antigen processing and presentation of endogenous peptide antigen via MHC class I	12913	7053	7.28231
523	0.00408519	280	806	33	0.0409429	0.117857	GO:0090066	GO:BP	regulation of anatomical structure size	12913	21292	1.8882
524	0.00409852	436	806	46	0.057072	0.105505	GO:0051347	GO:BP	positive regulation of transferase activity	12913	15927	1.6903
525	0.00412803	351	806	39	0.0483871	0.111111	GO:0009896	GO:BP	positive regulation of catabolic process	12913	4257	1.78012
526	0.00420083	61	806	12	0.0148883	0.196721	GO:0071158	GO:BP	positive regulation of cell cycle arrest	12913	19400	3.15169
527	0.00420901	449	806	47	0.0583127	0.104677	GO:0050778	GO:BP	positive regulation of immune response	12913	15452	1.67704
528	0.00431199	376	806	41	0.0508685	0.109043	GO:0071417	GO:BP	cellular response to organonitrogen compound	12913	19613	1.74698
529	0.00431199	79	806	14	0.0173697	0.177215	GO:2001243	GO:BP	negative regulation of intrinsic apoptotic signaling pathway	12913	30456	2.83918
530	0.00441791	98	806	16	0.0198511	0.163265	GO:0048762	GO:BP	mesenchymal cell differentiation	12913	15188	2.61569
531	0.00445299	138	806	20	0.0248139	0.144928	GO:2001235	GO:BP	positive regulation of apoptotic signaling pathway	12913	30448	2.3219
532	0.00445762	305	806	35	0.0434243	0.114754	GO:0042326	GO:BP	negative regulation of phosphorylation	12913	11757	1.83849
533	0.00448374	53	806	11	0.0136476	0.207547	GO:0007007	GO:BP	inner mitochondrial membrane organization	12913	2964	3.32513
534	0.00453094	329	806	37	0.0459057	0.112462	GO:0071407	GO:BP	cellular response to organic cyclic compound	12913	19603	1.80176
535	0.00468913	181	806	24	0.0297767	0.132597	GO:0022409	GO:BP	positive regulation of cell-cell adhesion	12913	7640	2.12434
536	0.00470574	306	806	35	0.0434243	0.114379	GO:0031331	GO:BP	positive regulation of cellular catabolic process	12913	8328	1.83248
537	0.00474178	378	806	41	0.0508685	0.108466	GO:0050865	GO:BP	regulation of cell activation	12913	15521	1.73774
538	0.00493641	17	806	6	0.00744417	0.352941	GO:0070262	GO:BP	peptidyl-serine dephosphorylation	12913	18915	5.6545
539	0.00493641	17	806	6	0.00744417	0.352941	GO:0010712	GO:BP	regulation of collagen metabolic process	12913	4894	5.6545
540	0.00506753	150	806	21	0.0260546	0.14	GO:0051495	GO:BP	positive regulation of cytoskeleton organization	12913	16028	2.24295
541	0.00506753	150	806	21	0.0260546	0.14	GO:0070663	GO:BP	regulation of leukocyte proliferation	12913	19154	2.24295
542	0.00506753	516	806	52	0.0645161	0.100775	GO:0045859	GO:BP	regulation of protein kinase activity	12913	13695	1.61453
543	0.00506846	829	806	76	0.0942928	0.0916767	GO:1902679	GO:BP	negative regulation of RNA biosynthetic process	12913	25852	1.46876
544	0.00506846	829	806	76	0.0942928	0.0916767	GO:1903507	GO:BP	negative regulation of nucleic acid-templated transcription	12913	26586	1.46876
545	0.00519178	54	806	11	0.0136476	0.203704	GO:0070059	GO:BP	intrinsic apoptotic signaling pathway in response to endoplasmic reticulum stress	12913	18778	3.26356
546	0.00519178	54	806	11	0.0136476	0.203704	GO:0009206	GO:BP	purine ribonucleoside triphosphate biosynthetic process	12913	3839	3.26356
547	0.00523633	140	806	20	0.0248139	0.142857	GO:0051028	GO:BP	mRNA transport	12913	15663	2.28873
548	0.00532117	685	806	65	0.0806452	0.0948905	GO:1903047	GO:BP	mitotic cell cycle process	12913	26183	1.52025
549	0.0053812	183	806	24	0.0297767	0.131148	GO:0051168	GO:BP	nuclear export	12913	15777	2.10113
550	0.00553426	7	806	4	0.00496278	0.571429	GO:1903003	GO:BP	positive regulation of protein deubiquitination	12913	26141	9.15491
551	0.00553682	72	806	13	0.016129	0.180556	GO:0050729	GO:BP	positive regulation of inflammatory response	12913	15415	2.8927
552	0.0056273	251	806	30	0.0372208	0.119522	GO:0034976	GO:BP	response to endoplasmic reticulum stress	12913	10134	1.91487
553	0.00579009	263	806	31	0.0384615	0.117871	GO:0048232	GO:BP	male gamete generation	12913	14755	1.88842
554	0.00585406	714	806	67	0.0831266	0.0938375	GO:0022414	GO:BP	reproductive process	12913	7645	1.50338
555	0.00586464	31	806	8	0.00992556	0.258065	GO:0072091	GO:BP	regulation of stem cell proliferation	12913	20129	4.13448
556	0.00600887	55	806	11	0.0136476	0.2	GO:0009145	GO:BP	purine nucleoside triphosphate biosynthetic process	12913	3779	3.20422
557	0.00600887	55	806	11	0.0136476	0.2	GO:0055072	GO:BP	iron ion homeostasis	12913	16926	3.20422
558	0.00604164	371	806	40	0.0496278	0.107817	GO:0070848	GO:BP	response to growth factor	12913	19256	1.72734
559	0.00608259	359	806	39	0.0483871	0.108635	GO:0071363	GO:BP	cellular response to growth factor stimulus	12913	19559	1.74045
560	0.00613778	12	806	5	0.00620347	0.416667	GO:0030810	GO:BP	positive regulation of nucleotide biosynthetic process	12913	8045	6.67545
561	0.00613778	12	806	5	0.00620347	0.416667	GO:1900373	GO:BP	positive regulation of purine nucleotide biosynthetic process	12913	23721	6.67545
562	0.0061704	185	806	24	0.0297767	0.12973	GO:1901991	GO:BP	negative regulation of mitotic cell cycle phase transition	12913	25260	2.07841
563	0.00617238	534	806	53	0.0657568	0.0992509	GO:0006812	GO:BP	cation transport	12913	2802	1.59011
564	0.00620615	716	806	67	0.0831266	0.0935754	GO:0000003	GO:BP	reproduction	12913	3	1.49918
565	0.00628486	253	806	30	0.0372208	0.118577	GO:0007283	GO:BP	spermatogenesis	12913	3209	1.89973
566	0.00646785	2532	806	195	0.241935	0.0770142	GO:0048731	GO:BP	system development	12913	15159	1.23385
567	0.00658306	197	806	25	0.0310174	0.126904	GO:0050727	GO:BP	regulation of inflammatory response	12913	15413	2.03313
568	0.00658306	175	806	23	0.028536	0.131429	GO:0031396	GO:BP	regulation of protein ubiquitination	12913	8359	2.10563
569	0.00662306	18	806	6	0.00744417	0.333333	GO:0019646	GO:BP	aerobic electron transport chain	12913	6923	5.34036
570	0.00662306	18	806	6	0.00744417	0.333333	GO:0006123	GO:BP	mitochondrial electron transport, cytochrome c to oxygen	12913	2179	5.34036
571	0.00662306	18	806	6	0.00744417	0.333333	GO:0044346	GO:BP	fibroblast apoptotic process	12913	12845	5.34036
572	0.00701508	74	806	13	0.016129	0.175676	GO:0009199	GO:BP	ribonucleoside triphosphate metabolic process	12913	3832	2.81452
573	0.00711834	1044	806	91	0.112903	0.0871648	GO:1903508	GO:BP	positive regulation of nucleic acid-templated transcription	12913	26587	1.39647
574	0.00712735	32	806	8	0.00992556	0.25	GO:0043029	GO:BP	T cell homeostasis	12913	12192	4.00527
575	0.00712735	800	806	73	0.0905707	0.09125	GO:0045892	GO:BP	negative regulation of transcription, DNA-templated	12913	13724	1.46192
576	0.00712735	32	806	8	0.00992556	0.25	GO:1905898	GO:BP	positive regulation of response to endoplasmic reticulum stress	12913	28788	4.00527
577	0.00729136	1045	806	91	0.112903	0.0870813	GO:1902680	GO:BP	positive regulation of RNA biosynthetic process	12913	25853	1.39514
578	0.00735909	48	806	10	0.0124069	0.208333	GO:1903573	GO:BP	negative regulation of response to endoplasmic reticulum stress	12913	26650	3.33773
579	0.00735909	48	806	10	0.0124069	0.208333	GO:0006301	GO:BP	postreplication repair	12913	2346	3.33773
580	0.00741259	303	806	34	0.0421836	0.112211	GO:0051090	GO:BP	regulation of DNA-binding transcription factor activity	12913	15707	1.79775
581	0.00746967	134	806	19	0.0235732	0.141791	GO:0030041	GO:BP	actin filament polymerization	12913	7745	2.27165
582	0.00747819	166	806	22	0.0272953	0.13253	GO:1903039	GO:BP	positive regulation of leukocyte cell-cell adhesion	12913	26175	2.12328
583	0.00747819	84	806	14	0.0173697	0.166667	GO:2000278	GO:BP	regulation of DNA biosynthetic process	12913	29546	2.67018
584	0.007487	40	806	9	0.0111663	0.225	GO:0043124	GO:BP	negative regulation of I-kappaB kinase/NF-kappaB signaling	12913	12256	3.60475
585	0.00768495	124	806	18	0.0223325	0.145161	GO:0051092	GO:BP	positive regulation of NF-kappaB transcription factor activity	12913	15709	2.32564
586	0.00788982	750	806	69	0.0856079	0.092	GO:0045944	GO:BP	positive regulation of transcription by RNA polymerase II	12913	13773	1.47394
587	0.00794265	156	806	21	0.0260546	0.134615	GO:0009266	GO:BP	response to temperature stimulus	12913	3898	2.15669
588	0.00797162	66	806	12	0.0148883	0.181818	GO:0006919	GO:BP	activation of cysteine-type endopeptidase activity involved in apoptotic process	12913	2891	2.91293
589	0.00803654	167	806	22	0.0272953	0.131737	GO:2001234	GO:BP	negative regulation of apoptotic signaling pathway	12913	30447	2.11056
590	0.00805878	178	806	23	0.028536	0.129213	GO:0110053	GO:BP	regulation of actin filament organization	12913	22853	2.07014
591	0.00816415	329	806	36	0.044665	0.109422	GO:1901652	GO:BP	response to peptide	12913	24939	1.75307
592	0.00830509	258	806	30	0.0372208	0.116279	GO:0010948	GO:BP	negative regulation of cell cycle process	12913	5109	1.86292
593	0.00855714	157	806	21	0.0260546	0.133758	GO:0036294	GO:BP	cellular response to decreased oxygen levels	12913	11072	2.14295
594	0.00858107	95	806	15	0.0186104	0.157895	GO:0031124	GO:BP	mRNA 3'-end processing	12913	8235	2.52965
595	0.00862979	168	806	22	0.0272953	0.130952	GO:0071453	GO:BP	cellular response to oxygen levels	12913	19642	2.098
596	0.00864381	753	806	69	0.0856079	0.0916335	GO:0030163	GO:BP	protein catabolic process	12913	7780	1.46807
597	0.00864981	983	806	86	0.1067	0.0874873	GO:0045893	GO:BP	positive regulation of transcription, DNA-templated	12913	13725	1.40164
598	0.00875868	19	806	6	0.00744417	0.315789	GO:0000028	GO:BP	ribosomal small subunit assembly	12913	15	5.05929
599	0.00886334	13	806	5	0.00620347	0.384615	GO:1903894	GO:BP	regulation of IRE1-mediated unfolded protein response	12913	26933	6.16196
600	0.00900332	202	806	25	0.0310174	0.123762	GO:0002237	GO:BP	response to molecule of bacterial origin	12913	908	1.98281
601	0.00900332	493	806	49	0.060794	0.0993915	GO:0044703	GO:BP	multi-organism reproductive process	12913	13054	1.59236
602	0.00900332	202	806	25	0.0310174	0.123762	GO:0043122	GO:BP	regulation of I-kappaB kinase/NF-kappaB signaling	12913	12254	1.98281
603	0.00924646	26	806	7	0.00868486	0.269231	GO:0071353	GO:BP	cellular response to interleukin-4	12913	19549	4.31337
604	0.00930964	116	806	17	0.0210918	0.146552	GO:1903322	GO:BP	positive regulation of protein modification by small protein conjugation or removal	12913	26413	2.34792
605	0.00951819	8	806	4	0.00496278	0.5	GO:1903897	GO:BP	regulation of PERK-mediated unfolded protein response	12913	26936	8.01055
606	0.00951819	8	806	4	0.00496278	0.5	GO:0002480	GO:BP	antigen processing and presentation of exogenous peptide antigen via MHC class I, TAP-independent	12913	1150	8.01055
607	0.00951819	8	806	4	0.00496278	0.5	GO:0000056	GO:BP	ribosomal small subunit export from nucleus	12913	27	8.01055
608	0.00951819	8	806	4	0.00496278	0.5	GO:0051238	GO:BP	sequestering of metal ion	12913	15836	8.01055
609	0.00961666	482	806	48	0.0595533	0.0995851	GO:0043086	GO:BP	negative regulation of catalytic activity	12913	12230	1.59546
610	0.00973876	261	806	30	0.0372208	0.114943	GO:0045785	GO:BP	positive regulation of cell adhesion	12913	13631	1.8415
611	0.0101383	4	806	3	0.00372208	0.75	GO:2000138	GO:BP	positive regulation of cell proliferation involved in heart morphogenesis	12913	29408	12.0158
612	0.0101383	652	806	61	0.0756824	0.0935583	GO:0044257	GO:BP	cellular protein catabolic process	12913	12802	1.49891
613	0.0101383	4	806	3	0.00372208	0.75	GO:0003413	GO:BP	chondrocyte differentiation involved in endochondral bone morphogenesis	12913	2010	12.0158
614	0.010296	34	806	8	0.00992556	0.235294	GO:0034314	GO:BP	Arp2/3 complex-mediated actin nucleation	12913	9910	3.76967
615	0.010296	34	806	8	0.00992556	0.235294	GO:1904358	GO:BP	positive regulation of telomere maintenance via telomere lengthening	12913	27363	3.76967
616	0.010296	107	806	16	0.0198511	0.149533	GO:0060348	GO:BP	bone development	12913	17273	2.39568
617	0.0103281	42	806	9	0.0111663	0.214286	GO:0061014	GO:BP	positive regulation of mRNA catabolic process	12913	17916	3.43309
618	0.0103281	193	806	24	0.0297767	0.124352	GO:0001503	GO:BP	ossification	12913	439	1.99226
619	0.010533	216	806	26	0.0322581	0.12037	GO:0048608	GO:BP	reproductive structure development	12913	15038	1.92846
620	0.0106678	251	806	29	0.0359801	0.115538	GO:1901653	GO:BP	cellular response to peptide	12913	24940	1.85104
621	0.0106678	384	806	40	0.0496278	0.104167	GO:0045936	GO:BP	negative regulation of phosphate metabolic process	12913	13766	1.66886
622	0.0107968	78	806	13	0.016129	0.166667	GO:0071156	GO:BP	regulation of cell cycle arrest	12913	19398	2.67018
623	0.0109612	139	806	19	0.0235732	0.136691	GO:0031348	GO:BP	negative regulation of defense response	12913	8344	2.18993
624	0.0109674	194	806	24	0.0297767	0.123711	GO:0032496	GO:BP	response to lipopolysaccharide	12913	8867	1.98199
625	0.0109674	602	806	57	0.0707196	0.0946844	GO:0051603	GO:BP	proteolysis involved in cellular protein catabolic process	12913	16106	1.51695
626	0.0109674	194	806	24	0.0297767	0.123711	GO:1901988	GO:BP	negative regulation of cell cycle phase transition	12913	25257	1.98199
627	0.0111056	385	806	40	0.0496278	0.103896	GO:0010563	GO:BP	negative regulation of phosphorus metabolic process	12913	4755	1.66453
628	0.0111508	88	806	14	0.0173697	0.159091	GO:0051147	GO:BP	regulation of muscle cell differentiation	12913	15756	2.54881
629	0.0111696	51	806	10	0.0124069	0.196078	GO:0051153	GO:BP	regulation of striated muscle cell differentiation	12913	15762	3.14139
630	0.0111934	252	806	29	0.0359801	0.115079	GO:0050900	GO:BP	leukocyte migration	12913	15550	1.8437
631	0.0112366	98	806	15	0.0186104	0.153061	GO:0050777	GO:BP	negative regulation of immune response	12913	15451	2.45221
632	0.0112406	27	806	7	0.00868486	0.259259	GO:0002756	GO:BP	MyD88-independent toll-like receptor signaling pathway	12913	1419	4.15362
633	0.0112406	27	806	7	0.00868486	0.259259	GO:0070670	GO:BP	response to interleukin-4	12913	19161	4.15362
634	0.0112406	27	806	7	0.00868486	0.259259	GO:0097028	GO:BP	dendritic cell differentiation	12913	21813	4.15362
635	0.0113558	60	806	11	0.0136476	0.183333	GO:0009201	GO:BP	ribonucleoside triphosphate biosynthetic process	12913	3834	2.9372
636	0.0116034	195	806	24	0.0297767	0.123077	GO:1902105	GO:BP	regulation of leukocyte differentiation	12913	25367	1.97183
637	0.011947	43	806	9	0.0111663	0.209302	GO:0001892	GO:BP	embryonic placenta development	12913	645	3.35325
638	0.011947	43	806	9	0.0111663	0.209302	GO:0006879	GO:BP	cellular iron ion homeostasis	12913	2856	3.35325
639	0.012207	14	806	5	0.00620347	0.357143	GO:0032965	GO:BP	regulation of collagen biosynthetic process	12913	9223	5.72182
640	0.012207	14	806	5	0.00620347	0.357143	GO:0061158	GO:BP	3'-UTR-mediated mRNA destabilization	12913	18050	5.72182
641	0.012207	14	806	5	0.00620347	0.357143	GO:0002483	GO:BP	antigen processing and presentation of endogenous peptide antigen	12913	1153	5.72182
642	0.012207	14	806	5	0.00620347	0.357143	GO:2001169	GO:BP	regulation of ATP biosynthetic process	12913	30389	5.72182
643	0.0127632	231	806	27	0.0334988	0.116883	GO:0070997	GO:BP	neuron death	12913	19351	1.8726
644	0.0130859	944	806	82	0.101737	0.0868644	GO:0009888	GO:BP	tissue development	12913	4249	1.39166
645	0.0130859	555	806	53	0.0657568	0.0954955	GO:0000122	GO:BP	negative regulation of transcription by RNA polymerase II	12913	64	1.52994
646	0.0132175	220	806	26	0.0322581	0.118182	GO:0061458	GO:BP	reproductive system development	12913	18342	1.8934
647	0.013499	582	806	55	0.0682382	0.0945017	GO:0043549	GO:BP	regulation of kinase activity	12913	12496	1.51402
648	0.0136124	142	806	19	0.0235732	0.133803	GO:0032944	GO:BP	regulation of mononuclear cell proliferation	12913	9203	2.14367
649	0.0136124	142	806	19	0.0235732	0.133803	GO:0050670	GO:BP	regulation of lymphocyte proliferation	12913	15387	2.14367
650	0.0136124	209	806	25	0.0310174	0.119617	GO:0032102	GO:BP	negative regulation of response to external stimulus	12913	8607	1.9164
651	0.0137989	28	806	7	0.00868486	0.25	GO:1902235	GO:BP	regulation of endoplasmic reticulum stress-induced intrinsic apoptotic signaling pathway	12913	25488	4.00527
652	0.0137989	28	806	7	0.00868486	0.25	GO:0000470	GO:BP	maturation of LSU-rRNA	12913	218	4.00527
653	0.0139414	280	806	31	0.0384615	0.110714	GO:0032386	GO:BP	regulation of intracellular transport	12913	8799	1.77376
654	0.0143171	187	806	23	0.028536	0.122995	GO:0048568	GO:BP	embryonic organ development	12913	15008	1.97051
655	0.0143619	21	806	6	0.00744417	0.285714	GO:0050857	GO:BP	positive regulation of antigen receptor-mediated signaling pathway	12913	15513	4.57745
656	0.0143619	132	806	18	0.0223325	0.136364	GO:0051651	GO:BP	maintenance of location in cell	12913	16150	2.18469
657	0.014819	222	806	26	0.0322581	0.117117	GO:0001501	GO:BP	skeletal system development	12913	437	1.87634
658	0.0148424	91	806	14	0.0173697	0.153846	GO:0009141	GO:BP	nucleoside triphosphate metabolic process	12913	3775	2.46478
659	0.0148424	91	806	14	0.0173697	0.153846	GO:1905477	GO:BP	positive regulation of protein localization to membrane	12913	28407	2.46478
660	0.0149373	9	806	4	0.00496278	0.444444	GO:0070486	GO:BP	leukocyte aggregation	12913	19048	7.12049
661	0.0149373	9	806	4	0.00496278	0.444444	GO:0045837	GO:BP	negative regulation of membrane potential	12913	13675	7.12049
662	0.0149373	9	806	4	0.00496278	0.444444	GO:0010917	GO:BP	negative regulation of mitochondrial membrane potential	12913	5080	7.12049
663	0.0149373	9	806	4	0.00496278	0.444444	GO:0035584	GO:BP	calcium-mediated signaling using intracellular calcium source	12913	10559	7.12049
664	0.0149907	122	806	17	0.0210918	0.139344	GO:1903900	GO:BP	regulation of viral life cycle	12913	26939	2.23245
665	0.015327	343	806	36	0.044665	0.104956	GO:0007276	GO:BP	gamete generation	12913	3202	1.68151
666	0.0154091	133	806	18	0.0223325	0.135338	GO:0002573	GO:BP	myeloid leukocyte differentiation	12913	1242	2.16827
667	0.0154091	133	806	18	0.0223325	0.135338	GO:0031123	GO:BP	RNA 3'-end processing	12913	8234	2.16827
668	0.0155367	72	806	12	0.0148883	0.166667	GO:0002832	GO:BP	negative regulation of response to biotic stimulus	12913	1494	2.67018
669	0.0159954	247	806	28	0.0347395	0.11336	GO:0045930	GO:BP	negative regulation of mitotic cell cycle	12913	13760	1.81616
670	0.0159954	45	806	9	0.0111663	0.2	GO:0032206	GO:BP	positive regulation of telomere maintenance	12913	8650	3.20422
671	0.0160917	82	806	13	0.016129	0.158537	GO:0045069	GO:BP	regulation of viral genome replication	12913	13224	2.53993
672	0.01643	15	806	5	0.00620347	0.333333	GO:0000054	GO:BP	ribosomal subunit export from nucleus	12913	25	5.34036
673	0.01643	54	806	10	0.0124069	0.185185	GO:0070227	GO:BP	lymphocyte apoptotic process	12913	18886	2.96687
674	0.01643	1204	806	100	0.124069	0.0830565	GO:0006468	GO:BP	protein phosphorylation	12913	2480	1.33066
675	0.01643	15	806	5	0.00620347	0.333333	GO:0050832	GO:BP	defense response to fungus	12913	15491	5.34036
676	0.01643	54	806	10	0.0124069	0.185185	GO:0044783	GO:BP	G1 DNA damage checkpoint	12913	13097	2.96687
677	0.01643	15	806	5	0.00620347	0.333333	GO:0000463	GO:BP	maturation of LSU-rRNA from tricistronic rRNA transcript (SSU-rRNA, 5.8S rRNA, LSU-rRNA)	12913	211	5.34036
678	0.01643	15	806	5	0.00620347	0.333333	GO:0033750	GO:BP	ribosome localization	12913	9685	5.34036
679	0.01643	15	806	5	0.00620347	0.333333	GO:1901798	GO:BP	positive regulation of signal transduction by p53 class mediator	12913	25073	5.34036
680	0.0164901	29	806	7	0.00868486	0.241379	GO:0009409	GO:BP	response to cold	12913	3949	3.86716
681	0.0164901	29	806	7	0.00868486	0.241379	GO:0070423	GO:BP	nucleotide-binding oligomerization domain containing signaling pathway	12913	19009	3.86716
682	0.0164924	167	806	21	0.0260546	0.125749	GO:0006611	GO:BP	protein export from nucleus	12913	2617	2.01463
683	0.0165144	345	806	36	0.044665	0.104348	GO:0010035	GO:BP	response to inorganic substance	12913	4350	1.67177
684	0.0167002	113	806	16	0.0198511	0.141593	GO:0032479	GO:BP	regulation of type I interferon production	12913	8850	2.26847
685	0.0167002	37	806	8	0.00992556	0.216216	GO:0042769	GO:BP	DNA damage response, detection of DNA damage	12913	12035	3.46402
686	0.0168785	190	806	23	0.028536	0.121053	GO:0051047	GO:BP	positive regulation of secretion	12913	15678	1.9394
687	0.0170756	73	806	12	0.0148883	0.164384	GO:0001837	GO:BP	epithelial to mesenchymal transition	12913	621	2.6336
688	0.0171284	434	806	43	0.0533499	0.0990783	GO:0031400	GO:BP	negative regulation of protein modification process	12913	8363	1.58734
689	0.0172151	103	806	15	0.0186104	0.145631	GO:0033002	GO:BP	muscle cell proliferation	12913	9246	2.33317
690	0.0173617	237	806	27	0.0334988	0.113924	GO:1902903	GO:BP	regulation of supramolecular fiber organization	12913	26049	1.82519
691	0.0175142	93	806	14	0.0173697	0.150538	GO:0006626	GO:BP	protein targeting to mitochondrion	12913	2632	2.41178
692	0.017694	22	806	6	0.00744417	0.272727	GO:0070229	GO:BP	negative regulation of lymphocyte apoptotic process	12913	18888	4.36939
693	0.017694	22	806	6	0.00744417	0.272727	GO:1902175	GO:BP	regulation of oxidative stress-induced intrinsic apoptotic signaling pathway	12913	25428	4.36939
694	0.0179636	64	806	11	0.0136476	0.171875	GO:0046902	GO:BP	regulation of mitochondrial membrane permeability	12913	14562	2.75363
695	0.018092	46	806	9	0.0111663	0.195652	GO:0006977	GO:BP	DNA damage response, signal transduction by p53 class mediator resulting in cell cycle arrest	12913	2940	3.13456
696	0.018092	46	806	9	0.0111663	0.195652	GO:0006984	GO:BP	ER-nucleus signaling pathway	12913	2946	3.13456
697	0.0182901	286	806	31	0.0384615	0.108392	GO:0006875	GO:BP	cellular metal ion homeostasis	12913	2852	1.73655
698	0.0182901	180	806	22	0.0272953	0.122222	GO:0045637	GO:BP	regulation of myeloid cell differentiation	12913	13489	1.95813
699	0.0187335	1140	806	95	0.117866	0.0833333	GO:2000026	GO:BP	regulation of multicellular organismal development	12913	29296	1.33509
700	0.0190292	147	806	19	0.0235732	0.129252	GO:0071456	GO:BP	cellular response to hypoxia	12913	19645	2.07075
701	0.0195525	204	806	24	0.0297767	0.117647	GO:0051235	GO:BP	maintenance of location	12913	15833	1.88483
702	0.0195792	115	806	16	0.0198511	0.13913	GO:0032606	GO:BP	type I interferon production	12913	8919	2.22902
703	0.0195792	115	806	16	0.0198511	0.13913	GO:0071346	GO:BP	cellular response to interferon-gamma	12913	19542	2.22902
704	0.0196746	30	806	7	0.00868486	0.233333	GO:0035872	GO:BP	nucleotide-binding domain, leucine rich repeat containing receptor signaling pathway	12913	10771	3.73825
705	0.0196746	30	806	7	0.00868486	0.233333	GO:0051973	GO:BP	positive regulation of telomerase activity	12913	16374	3.73825
706	0.019855	216	806	25	0.0310174	0.115741	GO:0001667	GO:BP	ameboidal-type cell migration	12913	503	1.85429
707	0.0198607	170	806	21	0.0260546	0.123529	GO:0072593	GO:BP	reactive oxygen species metabolic process	12913	20544	1.97908
708	0.0201799	159	806	20	0.0248139	0.125786	GO:0051054	GO:BP	positive regulation of DNA metabolic process	12913	15685	2.01523
709	0.0202052	756	806	67	0.0831266	0.0886243	GO:0006259	GO:BP	DNA metabolic process	12913	2307	1.41986
710	0.0202153	325	806	34	0.0421836	0.104615	GO:0055065	GO:BP	metal ion homeostasis	12913	16919	1.67605
711	0.02032	350	806	36	0.044665	0.102857	GO:0098662	GO:BP	inorganic cation transmembrane transport	12913	22225	1.64788
712	0.0205536	205	806	24	0.0297767	0.117073	GO:0051348	GO:BP	negative regulation of transferase activity	12913	15928	1.87564
713	0.0206287	47	806	9	0.0111663	0.191489	GO:0072431	GO:BP	signal transduction involved in mitotic G1 DNA damage checkpoint	12913	20443	3.06787
714	0.0206287	47	806	9	0.0111663	0.191489	GO:1902400	GO:BP	intracellular signal transduction involved in G1 DNA damage checkpoint	12913	25635	3.06787
715	0.0206488	5	806	3	0.00372208	0.6	GO:1903843	GO:BP	cellular response to arsenite ion	12913	26891	9.61266
716	0.0206488	5	806	3	0.00372208	0.6	GO:1903842	GO:BP	response to arsenite ion	12913	26890	9.61266
717	0.0206488	5	806	3	0.00372208	0.6	GO:1903898	GO:BP	negative regulation of PERK-mediated unfolded protein response	12913	26937	9.61266
718	0.0207993	217	806	25	0.0310174	0.115207	GO:0033157	GO:BP	regulation of intracellular protein transport	12913	9348	1.84575
719	0.0209261	116	806	16	0.0198511	0.137931	GO:0030595	GO:BP	leukocyte chemotaxis	12913	7979	2.20981
720	0.0209261	85	806	13	0.016129	0.152941	GO:1990542	GO:BP	mitochondrial transmembrane transport	12913	29057	2.45028
721	0.0212721	16	806	5	0.00620347	0.3125	GO:0019883	GO:BP	antigen processing and presentation of endogenous antigen	12913	7051	5.00659
722	0.0212721	16	806	5	0.00620347	0.3125	GO:0140467	GO:BP	integrated stress response signaling	12913	23239	5.00659
723	0.0212721	16	806	5	0.00620347	0.3125	GO:0071428	GO:BP	rRNA-containing ribonucleoprotein complex export from nucleus	12913	19623	5.00659
724	0.0212721	16	806	5	0.00620347	0.3125	GO:0036499	GO:BP	PERK-mediated unfolded protein response	12913	11178	5.00659
725	0.0213176	127	806	17	0.0210918	0.133858	GO:0045619	GO:BP	regulation of lymphocyte differentiation	12913	13471	2.14456
726	0.0214533	10	806	4	0.00496278	0.4	GO:0060546	GO:BP	negative regulation of necroptotic process	12913	17463	6.40844
727	0.0214533	23	806	6	0.00744417	0.26087	GO:0035456	GO:BP	response to interferon-beta	12913	10472	4.17942
728	0.0214533	415	806	41	0.0508685	0.0987952	GO:0048609	GO:BP	multicellular organismal reproductive process	12913	15039	1.58281
729	0.0214533	10	806	4	0.00496278	0.4	GO:0010575	GO:BP	positive regulation of vascular endothelial growth factor production	12913	4767	6.40844
730	0.0214533	23	806	6	0.00744417	0.26087	GO:0033119	GO:BP	negative regulation of RNA splicing	12913	9318	4.17942
731	0.0214533	10	806	4	0.00496278	0.4	GO:0062099	GO:BP	negative regulation of programmed necrotic cell death	12913	18699	6.40844
732	0.0214533	10	806	4	0.00496278	0.4	GO:1905209	GO:BP	positive regulation of cardiocyte differentiation	12913	28152	6.40844
733	0.0214533	23	806	6	0.00744417	0.26087	GO:0010939	GO:BP	regulation of necrotic cell death	12913	5102	4.17942
734	0.0219037	66	806	11	0.0136476	0.166667	GO:1903312	GO:BP	negative regulation of mRNA metabolic process	12913	26403	2.67018
735	0.0224135	303	806	32	0.0397022	0.105611	GO:0006913	GO:BP	nucleocytoplasmic transport	12913	2887	1.692
736	0.022654	291	806	31	0.0384615	0.106529	GO:0002831	GO:BP	regulation of response to biotic stimulus	12913	1493	1.70671
737	0.022654	353	806	36	0.044665	0.101983	GO:0009611	GO:BP	response to wounding	12913	4018	1.63388
738	0.022654	76	806	12	0.0148883	0.157895	GO:0071887	GO:BP	leukocyte apoptotic process	12913	19957	2.52965
739	0.0226762	468	806	45	0.0558313	0.0961538	GO:0044772	GO:BP	mitotic cell cycle phase transition	12913	13089	1.54049
740	0.0226762	494	806	47	0.0583127	0.0951417	GO:0044770	GO:BP	cell cycle phase transition	12913	13087	1.52427
741	0.022693	128	806	17	0.0210918	0.132812	GO:0007548	GO:BP	sex differentiation	12913	3446	2.1278
742	0.022758	279	806	30	0.0372208	0.107527	GO:0001933	GO:BP	negative regulation of protein phosphorylation	12913	678	1.7227
743	0.022758	219	806	25	0.0310174	0.114155	GO:0045088	GO:BP	regulation of innate immune response	12913	13231	1.82889
744	0.022758	57	806	10	0.0124069	0.175439	GO:2000106	GO:BP	regulation of leukocyte apoptotic process	12913	29376	2.81072
745	0.0227742	31	806	7	0.00868486	0.225806	GO:0048864	GO:BP	stem cell development	12913	15283	3.61767
746	0.0229206	48	806	9	0.0111663	0.1875	GO:1902403	GO:BP	signal transduction involved in mitotic DNA integrity checkpoint	12913	25638	3.00395
747	0.0229206	48	806	9	0.0111663	0.1875	GO:1902402	GO:BP	signal transduction involved in mitotic DNA damage checkpoint	12913	25637	3.00395
748	0.0229206	48	806	9	0.0111663	0.1875	GO:0072413	GO:BP	signal transduction involved in mitotic cell cycle checkpoint	12913	20428	3.00395
749	0.0231488	107	806	15	0.0186104	0.140187	GO:0006406	GO:BP	mRNA export from nucleus	12913	2431	2.24595
750	0.0231488	107	806	15	0.0186104	0.140187	GO:0042129	GO:BP	regulation of T cell proliferation	12913	11638	2.24595
751	0.0231488	107	806	15	0.0186104	0.140187	GO:0071427	GO:BP	mRNA-containing ribonucleoprotein complex export from nucleus	12913	19622	2.24595
752	0.0237435	280	806	30	0.0372208	0.107143	GO:0048514	GO:BP	blood vessel morphogenesis	12913	14964	1.71655
753	0.0238021	418	806	41	0.0508685	0.0980861	GO:0032504	GO:BP	multicellular organism reproduction	12913	8873	1.57145
754	0.0240744	67	806	11	0.0136476	0.164179	GO:0016202	GO:BP	regulation of striated muscle tissue development	12913	5798	2.63033
755	0.0240744	67	806	11	0.0136476	0.164179	GO:1901861	GO:BP	regulation of muscle tissue development	12913	25136	2.63033
756	0.0254208	306	806	32	0.0397022	0.104575	GO:0051169	GO:BP	nuclear transport	12913	15778	1.67541
757	0.0254381	40	806	8	0.00992556	0.2	GO:0060349	GO:BP	bone morphogenesis	12913	17274	3.20422
758	0.0254381	40	806	8	0.00992556	0.2	GO:0070228	GO:BP	regulation of lymphocyte apoptotic process	12913	18887	3.20422
759	0.0254823	58	806	10	0.0124069	0.172414	GO:0033077	GO:BP	T cell differentiation in thymus	12913	9300	2.76226
760	0.0259477	130	806	17	0.0210918	0.130769	GO:0002244	GO:BP	hematopoietic progenitor cell differentiation	12913	915	2.09507
761	0.0259477	24	806	6	0.00744417	0.25	GO:0034142	GO:BP	toll-like receptor 4 signaling pathway	12913	9779	4.00527
762	0.0259477	49	806	9	0.0111663	0.183673	GO:1902369	GO:BP	negative regulation of RNA catabolic process	12913	25608	2.94265
763	0.0259477	24	806	6	0.00744417	0.25	GO:0060711	GO:BP	labyrinthine layer development	12913	17619	4.00527
764	0.0259477	24	806	6	0.00744417	0.25	GO:0043330	GO:BP	response to exogenous dsRNA	12913	12358	4.00527
765	0.0259477	24	806	6	0.00744417	0.25	GO:0051125	GO:BP	regulation of actin nucleation	12913	15735	4.00527
766	0.0259477	24	806	6	0.00744417	0.25	GO:0035666	GO:BP	TRIF-dependent toll-like receptor signaling pathway	12913	10609	4.00527
767	0.0260294	98	806	14	0.0173697	0.142857	GO:0048524	GO:BP	positive regulation of viral process	12913	14974	2.28873
768	0.0265423	68	806	11	0.0136476	0.161765	GO:0060333	GO:BP	interferon-gamma-mediated signaling pathway	12913	17259	2.59165
769	0.0265423	68	806	11	0.0136476	0.161765	GO:0048634	GO:BP	regulation of muscle organ development	12913	15064	2.59165
770	0.0265423	68	806	11	0.0136476	0.161765	GO:0045639	GO:BP	positive regulation of myeloid cell differentiation	12913	13491	2.59165
771	0.0265423	246	806	27	0.0334988	0.109756	GO:0031647	GO:BP	regulation of protein stability	12913	8478	1.75841
772	0.0265423	68	806	11	0.0136476	0.161765	GO:1903533	GO:BP	regulation of protein targeting	12913	26612	2.59165
773	0.0266551	88	806	13	0.016129	0.147727	GO:0001889	GO:BP	liver development	12913	643	2.36675
774	0.026913	109	806	15	0.0186104	0.137615	GO:0001649	GO:BP	osteoblast differentiation	12913	492	2.20474
775	0.026913	109	806	15	0.0186104	0.137615	GO:0008406	GO:BP	gonad development	12913	3644	2.20474
776	0.0274471	333	806	34	0.0421836	0.102102	GO:0045860	GO:BP	positive regulation of protein kinase activity	12913	13696	1.63579
777	0.0275618	176	806	21	0.0260546	0.119318	GO:0001818	GO:BP	negative regulation of cytokine production	12913	602	1.91161
778	0.027798	235	806	26	0.0322581	0.110638	GO:0015672	GO:BP	monovalent inorganic cation transport	12913	5399	1.77255
779	0.0281896	59	806	10	0.0124069	0.169492	GO:0072422	GO:BP	signal transduction involved in DNA damage checkpoint	12913	20434	2.71544
780	0.0281896	59	806	10	0.0124069	0.169492	GO:0072401	GO:BP	signal transduction involved in DNA integrity checkpoint	12913	20422	2.71544
781	0.0281896	59	806	10	0.0124069	0.169492	GO:0072395	GO:BP	signal transduction involved in cell cycle checkpoint	12913	20416	2.71544
782	0.0282747	359	806	36	0.044665	0.100279	GO:1901987	GO:BP	regulation of cell cycle phase transition	12913	25256	1.60657
783	0.0289016	154	806	19	0.0235732	0.123377	GO:0050870	GO:BP	positive regulation of T cell activation	12913	15526	1.97663
784	0.0289016	41	806	8	0.00992556	0.195122	GO:0043489	GO:BP	RNA stabilization	12913	12464	3.12607
785	0.0289016	41	806	8	0.00992556	0.195122	GO:0070265	GO:BP	necrotic cell death	12913	18916	3.12607
786	0.0289913	89	806	13	0.016129	0.146067	GO:0007052	GO:BP	mitotic spindle organization	12913	3000	2.34016
787	0.0290725	398	806	39	0.0483871	0.0979899	GO:0032870	GO:BP	cellular response to hormone stimulus	12913	9140	1.56991
788	0.0292337	69	806	11	0.0136476	0.15942	GO:0009142	GO:BP	nucleoside triphosphate biosynthetic process	12913	3776	2.55409
789	0.0292757	143	806	18	0.0223325	0.125874	GO:0048863	GO:BP	stem cell differentiation	12913	15282	2.01664
790	0.0293894	121	806	16	0.0198511	0.132231	GO:0001959	GO:BP	regulation of cytokine-mediated signaling pathway	12913	699	2.11849
791	0.0296119	11	806	4	0.00496278	0.363636	GO:1900103	GO:BP	positive regulation of endoplasmic reticulum unfolded protein response	12913	23461	5.82585
792	0.0296119	11	806	4	0.00496278	0.363636	GO:0060547	GO:BP	negative regulation of necrotic cell death	12913	17464	5.82585
793	0.0296247	529	806	49	0.060794	0.0926276	GO:0006511	GO:BP	ubiquitin-dependent protein catabolic process	12913	2520	1.484
794	0.0301094	261	806	28	0.0347395	0.10728	GO:0002697	GO:BP	regulation of immune effector process	12913	1366	1.71874
795	0.0301456	490	806	46	0.057072	0.0938776	GO:0007346	GO:BP	regulation of mitotic cell cycle	12913	3260	1.50402
796	0.0307505	637	806	57	0.0707196	0.0894819	GO:0051241	GO:BP	negative regulation of multicellular organismal process	12913	15839	1.4336
797	0.0309532	33	806	7	0.00868486	0.212121	GO:0006458	GO:BP	'de novo' protein folding	12913	2472	3.39841
798	0.0309532	1379	806	110	0.136476	0.0797679	GO:0016192	GO:BP	vesicle-mediated transport	12913	5792	1.27797
799	0.0309532	25	806	6	0.00744417	0.24	GO:1900544	GO:BP	positive regulation of purine nucleotide metabolic process	12913	23885	3.84506
800	0.0309532	25	806	6	0.00744417	0.24	GO:0045981	GO:BP	positive regulation of nucleotide metabolic process	12913	13809	3.84506
801	0.0309532	25	806	6	0.00744417	0.24	GO:0050685	GO:BP	positive regulation of mRNA processing	12913	15399	3.84506
802	0.0310545	491	806	46	0.057072	0.0936864	GO:0051093	GO:BP	negative regulation of developmental process	12913	15710	1.50096
803	0.0311048	60	806	10	0.0124069	0.166667	GO:0051881	GO:BP	regulation of mitochondrial membrane potential	12913	16294	2.67018
804	0.0312861	90	806	13	0.016129	0.144444	GO:0061008	GO:BP	hepaticobiliary system development	12913	17911	2.31416
805	0.0313011	133	806	17	0.0210918	0.12782	GO:0071478	GO:BP	cellular response to radiation	12913	19666	2.04781
806	0.0313011	262	806	28	0.0347395	0.10687	GO:0045787	GO:BP	positive regulation of cell cycle	12913	13633	1.71218
807	0.0316922	2	806	2	0.00248139	1	GO:0060715	GO:BP	syncytiotrophoblast cell differentiation involved in labyrinthine layer development	12913	17623	16.0211
808	0.0316922	2	806	2	0.00248139	1	GO:0052203	GO:BP	modulation of catalytic activity in other organism involved in symbiotic interaction	12913	16564	16.0211
809	0.0316922	2	806	2	0.00248139	1	GO:1904586	GO:BP	cellular response to putrescine	12913	27574	16.0211
810	0.0316922	2	806	2	0.00248139	1	GO:0070488	GO:BP	neutrophil aggregation	12913	19050	16.0211
811	0.0316922	2	806	2	0.00248139	1	GO:0003418	GO:BP	growth plate cartilage chondrocyte differentiation	12913	2015	16.0211
812	0.0316922	2	806	2	0.00248139	1	GO:1904585	GO:BP	response to putrescine	12913	27573	16.0211
813	0.0316922	2	806	2	0.00248139	1	GO:1903004	GO:BP	regulation of protein K63-linked deubiquitination	12913	26142	16.0211
814	0.0316922	2	806	2	0.00248139	1	GO:0035606	GO:BP	peptidyl-cysteine S-trans-nitrosylation	12913	10571	16.0211
815	0.0316922	2	806	2	0.00248139	1	GO:0036496	GO:BP	regulation of translational initiation by eIF2 alpha dephosphorylation	12913	11175	16.0211
816	0.0316922	2	806	2	0.00248139	1	GO:0090289	GO:BP	regulation of osteoclast proliferation	12913	21508	16.0211
817	0.0316922	2	806	2	0.00248139	1	GO:1990646	GO:BP	cellular response to prolactin	12913	29106	16.0211
818	0.0316922	2	806	2	0.00248139	1	GO:2000158	GO:BP	positive regulation of ubiquitin-specific protease activity	12913	29428	16.0211
819	0.0316922	2	806	2	0.00248139	1	GO:1903006	GO:BP	positive regulation of protein K63-linked deubiquitination	12913	26144	16.0211
820	0.0316922	545	806	50	0.0620347	0.0917431	GO:0009725	GO:BP	response to hormone	12913	4108	1.46982
821	0.0316922	2	806	2	0.00248139	1	GO:1905663	GO:BP	positive regulation of telomerase RNA reverse transcriptase activity	12913	28578	16.0211
822	0.0316922	179	806	21	0.0260546	0.117318	GO:0033673	GO:BP	negative regulation of kinase activity	12913	9670	1.87957
823	0.0316922	2	806	2	0.00248139	1	GO:2000120	GO:BP	positive regulation of sodium-dependent phosphate transport	12913	29390	16.0211
824	0.0316922	2	806	2	0.00248139	1	GO:0071894	GO:BP	histone H2B conserved C-terminal lysine ubiquitination	12913	19962	16.0211
825	0.0316922	2	806	2	0.00248139	1	GO:0043335	GO:BP	protein unfolding	12913	12360	16.0211
826	0.0316922	350	806	35	0.0434243	0.1	GO:0001944	GO:BP	vasculature development	12913	686	1.60211
827	0.0317025	1167	806	95	0.117866	0.0814053	GO:0006508	GO:BP	proteolysis	12913	2517	1.3042
828	0.0317834	51	806	9	0.0111663	0.176471	GO:0070664	GO:BP	negative regulation of leukocyte proliferation	12913	19155	2.82725
829	0.0324858	546	806	50	0.0620347	0.0915751	GO:0043632	GO:BP	modification-dependent macromolecule catabolic process	12913	12556	1.46713
830	0.0326749	112	806	15	0.0186104	0.133929	GO:0045137	GO:BP	development of primary sexual characteristics	12913	13254	2.14568
831	0.0326979	18	806	5	0.00620347	0.277778	GO:0031468	GO:BP	nuclear envelope reassembly	12913	8395	4.4503
832	0.0326979	134	806	17	0.0210918	0.126866	GO:0007093	GO:BP	mitotic cell cycle checkpoint	12913	3037	2.03253
833	0.0326979	18	806	5	0.00620347	0.277778	GO:0048384	GO:BP	retinoic acid receptor signaling pathway	12913	14883	4.4503
834	0.033182	6	806	3	0.00372208	0.5	GO:1905461	GO:BP	positive regulation of vascular associated smooth muscle cell apoptotic process	12913	28391	8.01055
835	0.033182	6	806	3	0.00372208	0.5	GO:0045586	GO:BP	regulation of gamma-delta T cell differentiation	12913	13438	8.01055
836	0.033182	339	806	34	0.0421836	0.100295	GO:1901990	GO:BP	regulation of mitotic cell cycle phase transition	12913	25259	1.60684
837	0.033182	6	806	3	0.00372208	0.5	GO:0044532	GO:BP	modulation of apoptotic process in other organism	12913	12955	8.01055
838	0.033182	6	806	3	0.00372208	0.5	GO:0044531	GO:BP	modulation of programmed cell death in other organism	12913	12954	8.01055
839	0.033182	6	806	3	0.00372208	0.5	GO:1903715	GO:BP	regulation of aerobic respiration	12913	26789	8.01055
840	0.033182	6	806	3	0.00372208	0.5	GO:1902033	GO:BP	regulation of hematopoietic stem cell proliferation	12913	25302	8.01055
841	0.033182	6	806	3	0.00372208	0.5	GO:0032225	GO:BP	regulation of synaptic transmission, dopaminergic	12913	8666	8.01055
842	0.033182	6	806	3	0.00372208	0.5	GO:1903896	GO:BP	positive regulation of IRE1-mediated unfolded protein response	12913	26935	8.01055
843	0.033182	264	806	28	0.0347395	0.106061	GO:0048598	GO:BP	embryonic morphogenesis	12913	15034	1.69921
844	0.033182	6	806	3	0.00372208	0.5	GO:0051126	GO:BP	negative regulation of actin nucleation	12913	15736	8.01055
845	0.033182	6	806	3	0.00372208	0.5	GO:0009886	GO:BP	post-embryonic animal morphogenesis	12913	4247	8.01055
846	0.033182	6	806	3	0.00372208	0.5	GO:2000271	GO:BP	positive regulation of fibroblast apoptotic process	12913	29539	8.01055
847	0.033182	6	806	3	0.00372208	0.5	GO:0052248	GO:BP	modulation of programmed cell death in other organism involved in symbiotic interaction	12913	16609	8.01055
848	0.033182	180	806	21	0.0260546	0.116667	GO:1903532	GO:BP	positive regulation of secretion by cell	12913	26611	1.86913
849	0.033182	6	806	3	0.00372208	0.5	GO:0052433	GO:BP	modulation by organism of apoptotic process in other organism involved in symbiotic interaction	12913	16716	8.01055
850	0.033182	6	806	3	0.00372208	0.5	GO:0052150	GO:BP	modulation by symbiont of host apoptotic process	12913	16515	8.01055
851	0.033182	6	806	3	0.00372208	0.5	GO:0046643	GO:BP	regulation of gamma-delta T cell activation	12913	14381	8.01055
852	0.033225	455	806	43	0.0533499	0.0945055	GO:0061919	GO:BP	process utilizing autophagic mechanism	12913	18597	1.51408
853	0.033225	455	806	43	0.0533499	0.0945055	GO:0006914	GO:BP	autophagy	12913	2888	1.51408
854	0.0332869	192	806	22	0.0272953	0.114583	GO:0071356	GO:BP	cellular response to tumor necrosis factor	12913	19552	1.83575
855	0.0332869	252	806	27	0.0334988	0.107143	GO:0062197	GO:BP	cellular response to chemical stress	12913	18741	1.71655
856	0.0337445	71	806	11	0.0136476	0.15493	GO:0090559	GO:BP	regulation of membrane permeability	12913	21707	2.48214
857	0.0339094	277	806	29	0.0359801	0.104693	GO:0051052	GO:BP	regulation of DNA metabolic process	12913	15683	1.6773
858	0.034101	535	806	49	0.060794	0.0915888	GO:0019941	GO:BP	modification-dependent protein catabolic process	12913	7081	1.46735
859	0.0344242	265	806	28	0.0347395	0.10566	GO:0007015	GO:BP	actin filament organization	12913	2970	1.69279
860	0.03478	315	806	32	0.0397022	0.101587	GO:0006979	GO:BP	response to oxidative stress	12913	2942	1.62754
861	0.0349641	52	806	9	0.0111663	0.173077	GO:0046620	GO:BP	regulation of organ growth	12913	14361	2.77288
862	0.0351409	193	806	22	0.0272953	0.11399	GO:0051403	GO:BP	stress-activated MAPK cascade	12913	15964	1.82624
863	0.0352467	26	806	6	0.00744417	0.230769	GO:0015985	GO:BP	energy coupled proton transport, down electrochemical gradient	12913	5677	3.69718
864	0.0352467	26	806	6	0.00744417	0.230769	GO:0015986	GO:BP	ATP synthesis coupled proton transport	12913	5678	3.69718
865	0.0352467	26	806	6	0.00744417	0.230769	GO:0010830	GO:BP	regulation of myotube differentiation	12913	5006	3.69718
866	0.0352467	26	806	6	0.00744417	0.230769	GO:0001782	GO:BP	B cell homeostasis	12913	574	3.69718
867	0.0352467	26	806	6	0.00744417	0.230769	GO:0045648	GO:BP	positive regulation of erythrocyte differentiation	12913	13500	3.69718
868	0.0354553	405	806	39	0.0483871	0.0962963	GO:0019953	GO:BP	sexual reproduction	12913	7085	1.54277
869	0.0354708	43	806	8	0.00992556	0.186047	GO:0045824	GO:BP	negative regulation of innate immune response	12913	13662	2.98067
870	0.0356795	147	806	18	0.0223325	0.122449	GO:0090316	GO:BP	positive regulation of intracellular protein transport	12913	21534	1.96177
871	0.0362716	103	806	14	0.0173697	0.135922	GO:0042770	GO:BP	signal transduction in response to DNA damage	12913	12036	2.17762
872	0.0362716	82	806	12	0.0148883	0.146341	GO:0045471	GO:BP	response to ethanol	12913	13382	2.34455
873	0.0362716	82	806	12	0.0148883	0.146341	GO:0044773	GO:BP	mitotic DNA damage checkpoint	12913	13090	2.34455
874	0.0367838	72	806	11	0.0136476	0.152778	GO:0032355	GO:BP	response to estradiol	12913	8772	2.44767
875	0.0367838	72	806	11	0.0136476	0.152778	GO:0062207	GO:BP	regulation of pattern recognition receptor signaling pathway	12913	18743	2.44767
876	0.0367838	72	806	11	0.0136476	0.152778	GO:0010833	GO:BP	telomere maintenance via telomere lengthening	12913	5009	2.44767
877	0.0379334	12	806	4	0.00496278	0.333333	GO:0071850	GO:BP	mitotic cell cycle arrest	12913	19931	5.34036
878	0.0379334	12	806	4	0.00496278	0.333333	GO:1902074	GO:BP	response to salt	12913	25340	5.34036
879	0.0379334	12	806	4	0.00496278	0.333333	GO:0010574	GO:BP	regulation of vascular endothelial growth factor production	12913	4766	5.34036
880	0.0379334	12	806	4	0.00496278	0.333333	GO:0090085	GO:BP	regulation of protein deubiquitination	12913	21310	5.34036
881	0.0379334	12	806	4	0.00496278	0.333333	GO:0043011	GO:BP	myeloid dendritic cell differentiation	12913	12186	5.34036
882	0.0379334	12	806	4	0.00496278	0.333333	GO:0060213	GO:BP	positive regulation of nuclear-transcribed mRNA poly(A) tail shortening	12913	17148	5.34036
883	0.0382151	539	806	49	0.060794	0.0909091	GO:0072359	GO:BP	circulatory system development	12913	20386	1.45646
884	0.0387602	53	806	9	0.0111663	0.169811	GO:0031571	GO:BP	mitotic G1 DNA damage checkpoint	12913	8440	2.72056
885	0.0387602	53	806	9	0.0111663	0.169811	GO:0044819	GO:BP	mitotic G1/S transition checkpoint	12913	13122	2.72056
886	0.0391792	434	806	41	0.0508685	0.09447	GO:0051301	GO:BP	cell division	12913	15884	1.51351
887	0.0393171	19	806	5	0.00620347	0.263158	GO:0097421	GO:BP	liver regeneration	12913	22044	4.21608
888	0.0393171	35	806	7	0.00868486	0.2	GO:0042407	GO:BP	cristae formation	12913	11817	3.20422
889	0.0393171	19	806	5	0.00620347	0.263158	GO:0046622	GO:BP	positive regulation of organ growth	12913	14363	4.21608
890	0.0393171	35	806	7	0.00868486	0.2	GO:0031343	GO:BP	positive regulation of cell killing	12913	8339	3.20422
891	0.0393171	19	806	5	0.00620347	0.263158	GO:0032964	GO:BP	collagen biosynthetic process	12913	9222	4.21608
892	0.0393171	83	806	12	0.0148883	0.144578	GO:0030330	GO:BP	DNA damage response, signal transduction by p53 class mediator	12913	7872	2.3163
893	0.0397256	172	806	20	0.0248139	0.116279	GO:0050678	GO:BP	regulation of epithelial cell proliferation	12913	15395	1.86292
894	0.039844	44	806	8	0.00992556	0.181818	GO:1904377	GO:BP	positive regulation of protein localization to cell periphery	12913	27382	2.91293
895	0.039844	44	806	8	0.00992556	0.181818	GO:0031100	GO:BP	animal organ regeneration	12913	8212	2.91293
896	0.0398963	635	806	56	0.0694789	0.088189	GO:0070925	GO:BP	organelle assembly	12913	19298	1.41288
897	0.0398963	63	806	10	0.0124069	0.15873	GO:1990266	GO:BP	neutrophil migration	12913	28957	2.54303
898	0.0401956	232	806	25	0.0310174	0.107759	GO:0048732	GO:BP	gland development	12913	15160	1.72641
899	0.0402728	422	806	40	0.0496278	0.0947867	GO:0022411	GO:BP	cellular component disassembly	12913	7642	1.51859
900	0.0404244	196	806	22	0.0272953	0.112245	GO:0090068	GO:BP	positive regulation of cell cycle process	12913	21294	1.79829
901	0.04121	27	806	6	0.00744417	0.222222	GO:0051155	GO:BP	positive regulation of striated muscle cell differentiation	12913	15764	3.56024
902	0.04121	27	806	6	0.00744417	0.222222	GO:1903580	GO:BP	positive regulation of ATP metabolic process	12913	26657	3.56024
903	0.04121	27	806	6	0.00744417	0.222222	GO:1903513	GO:BP	endoplasmic reticulum to cytosol transport	12913	26592	3.56024
904	0.04121	27	806	6	0.00744417	0.222222	GO:0030970	GO:BP	retrograde protein transport, ER to cytosol	12913	8144	3.56024
905	0.0420765	233	806	25	0.0310174	0.107296	GO:0006470	GO:BP	protein dephosphorylation	12913	2482	1.719
906	0.0420765	233	806	25	0.0310174	0.107296	GO:0002696	GO:BP	positive regulation of leukocyte activation	12913	1365	1.719
907	0.0421233	295	806	30	0.0372208	0.101695	GO:0032103	GO:BP	positive regulation of response to external stimulus	12913	8608	1.62926
908	0.0422558	150	806	18	0.0223325	0.12	GO:0097305	GO:BP	response to alcohol	12913	21973	1.92253
909	0.0437955	74	806	11	0.0136476	0.148649	GO:0032204	GO:BP	regulation of telomere maintenance	12913	8648	2.38151
910	0.0440721	64	806	10	0.0124069	0.15625	GO:1903747	GO:BP	regulation of establishment of protein localization to mitochondrion	12913	26810	2.5033
911	0.0440725	95	806	13	0.016129	0.136842	GO:0006959	GO:BP	humoral immune response	12913	2926	2.19236
912	0.0446807	425	806	40	0.0496278	0.0941176	GO:0097435	GO:BP	supramolecular fiber organization	12913	22048	1.50787
913	0.0448237	151	806	18	0.0223325	0.119205	GO:0051701	GO:BP	interaction with host	12913	16191	1.9098
914	0.0448237	151	806	18	0.0223325	0.119205	GO:0050821	GO:BP	protein stabilization	12913	15483	1.9098
915	0.0448237	36	806	7	0.00868486	0.194444	GO:0071385	GO:BP	cellular response to glucocorticoid stimulus	12913	19581	3.11521
916	0.0448237	36	806	7	0.00868486	0.194444	GO:0070231	GO:BP	T cell apoptotic process	12913	18890	3.11521
917	0.0448237	210	806	23	0.028536	0.109524	GO:0007568	GO:BP	aging	12913	3466	1.75469
918	0.045572	335	806	33	0.0409429	0.0985075	GO:0002253	GO:BP	activation of immune response	12913	923	1.5782
919	0.0468564	848	806	71	0.0880893	0.0837264	GO:0007010	GO:BP	cytoskeleton organization	12913	2967	1.34139
920	0.0472298	199	806	22	0.0272953	0.110553	GO:0031330	GO:BP	negative regulation of cellular catabolic process	12913	8327	1.77118
921	0.0476282	96	806	13	0.016129	0.135417	GO:0051250	GO:BP	negative regulation of lymphocyte activation	12913	15845	2.16952
922	0.0477758	55	806	9	0.0111663	0.163636	GO:0035794	GO:BP	positive regulation of mitochondrial membrane permeability	12913	10716	2.62163
923	0.0478531	20	806	5	0.00620347	0.25	GO:0051560	GO:BP	mitochondrial calcium ion homeostasis	12913	16069	4.00527
924	0.0478531	20	806	5	0.00620347	0.25	GO:2000114	GO:BP	regulation of establishment of cell polarity	12913	29384	4.00527
925	0.0478531	20	806	5	0.00620347	0.25	GO:0039531	GO:BP	regulation of viral-induced cytoplasmic pattern recognition receptor signaling pathway	12913	11382	4.00527
926	0.0478531	20	806	5	0.00620347	0.25	GO:0071243	GO:BP	cellular response to arsenic-containing substance	12913	19445	4.00527
927	0.0478531	107	806	14	0.0173697	0.130841	GO:0043620	GO:BP	regulation of DNA-templated transcription in response to stress	12913	12548	2.09622
928	0.0478531	107	806	14	0.0173697	0.130841	GO:0006997	GO:BP	nucleus organization	12913	2955	2.09622
929	0.0479832	28	806	6	0.00744417	0.214286	GO:0003208	GO:BP	cardiac ventricle morphogenesis	12913	1807	3.43309
930	0.0479832	28	806	6	0.00744417	0.214286	GO:0048636	GO:BP	positive regulation of muscle organ development	12913	15066	3.43309
931	0.0479832	28	806	6	0.00744417	0.214286	GO:1902100	GO:BP	negative regulation of metaphase/anaphase transition of cell cycle	12913	25362	3.43309
932	0.0479832	311	806	31	0.0384615	0.0996785	GO:0009991	GO:BP	response to extracellular stimulus	12913	4318	1.59696
933	0.0479832	28	806	6	0.00744417	0.214286	GO:1901863	GO:BP	positive regulation of muscle tissue development	12913	25138	3.43309
934	0.0479832	28	806	6	0.00744417	0.214286	GO:0006515	GO:BP	protein quality control for misfolded or incompletely synthesized proteins	12913	2523	3.43309
935	0.0479832	28	806	6	0.00744417	0.214286	GO:0045844	GO:BP	positive regulation of striated muscle tissue development	12913	13682	3.43309
936	0.0479832	65	806	10	0.0124069	0.153846	GO:0032088	GO:BP	negative regulation of NF-kappaB transcription factor activity	12913	8596	2.46478
937	0.0479832	28	806	6	0.00744417	0.214286	GO:0045841	GO:BP	negative regulation of mitotic metaphase/anaphase transition	12913	13679	3.43309
938	0.0487461	13	806	4	0.00496278	0.307692	GO:0001916	GO:BP	positive regulation of T cell mediated cytotoxicity	12913	664	4.92957
939	0.0487461	212	806	23	0.028536	0.108491	GO:0051251	GO:BP	positive regulation of lymphocyte activation	12913	15846	1.73814
940	0.0487461	212	806	23	0.028536	0.108491	GO:0071375	GO:BP	cellular response to peptide hormone stimulus	12913	19571	1.73814
941	0.0487461	13	806	4	0.00496278	0.307692	GO:0072576	GO:BP	liver morphogenesis	12913	20535	4.92957
942	0.0487461	13	806	4	0.00496278	0.307692	GO:0032703	GO:BP	negative regulation of interleukin-2 production	12913	9016	4.92957
943	0.0487461	13	806	4	0.00496278	0.307692	GO:0070233	GO:BP	negative regulation of T cell apoptotic process	12913	18892	4.92957
944	0.0487762	200	806	22	0.0272953	0.11	GO:1901214	GO:BP	regulation of neuron death	12913	24544	1.76232
945	0.0489444	7	806	3	0.00372208	0.428571	GO:0071104	GO:BP	response to interleukin-9	12913	19389	6.86618
946	0.0489444	130	806	16	0.0198511	0.123077	GO:0060759	GO:BP	regulation of response to cytokine stimulus	12913	17666	1.97183
947	0.0489444	7	806	3	0.00372208	0.428571	GO:0070424	GO:BP	regulation of nucleotide-binding oligomerization domain containing signaling pathway	12913	19010	6.86618
948	0.0489444	7	806	3	0.00372208	0.428571	GO:0071355	GO:BP	cellular response to interleukin-9	12913	19551	6.86618
949	0.0489444	7	806	3	0.00372208	0.428571	GO:0060123	GO:BP	regulation of growth hormone secretion	12913	17072	6.86618
950	0.0489444	7	806	3	0.00372208	0.428571	GO:0038113	GO:BP	interleukin-9-mediated signaling pathway	12913	11269	6.86618
951	0.0489444	7	806	3	0.00372208	0.428571	GO:0002523	GO:BP	leukocyte migration involved in inflammatory response	12913	1192	6.86618
952	0.0489444	7	806	3	0.00372208	0.428571	GO:0098756	GO:BP	response to interleukin-21	12913	22285	6.86618
953	0.0489444	7	806	3	0.00372208	0.428571	GO:0098757	GO:BP	cellular response to interleukin-21	12913	22286	6.86618
954	0.0489444	7	806	3	0.00372208	0.428571	GO:1905459	GO:BP	regulation of vascular associated smooth muscle cell apoptotic process	12913	28389	6.86618
955	0.0489444	7	806	3	0.00372208	0.428571	GO:1905288	GO:BP	vascular associated smooth muscle cell apoptotic process	12913	28230	6.86618
956	0.0489444	7	806	3	0.00372208	0.428571	GO:0045647	GO:BP	negative regulation of erythrocyte differentiation	12913	13499	6.86618
957	0.0489444	7	806	3	0.00372208	0.428571	GO:0032471	GO:BP	negative regulation of endoplasmic reticulum calcium ion concentration	12913	8846	6.86618
958	0.0489444	7	806	3	0.00372208	0.428571	GO:0044387	GO:BP	negative regulation of protein kinase activity by regulation of protein phosphorylation	12913	12867	6.86618
959	0.0489444	7	806	3	0.00372208	0.428571	GO:0034116	GO:BP	positive regulation of heterotypic cell-cell adhesion	12913	9753	6.86618
960	0.0489444	7	806	3	0.00372208	0.428571	GO:0007253	GO:BP	cytoplasmic sequestering of NF-kappaB	12913	3181	6.86618
961	0.0489444	7	806	3	0.00372208	0.428571	GO:0038114	GO:BP	interleukin-21-mediated signaling pathway	12913	11270	6.86618
962	0.0489444	153	806	18	0.0223325	0.117647	GO:2000146	GO:BP	negative regulation of cell motility	12913	29416	1.88483
963	0.0489444	46	806	8	0.00992556	0.173913	GO:0098586	GO:BP	cellular response to virus	12913	22207	2.78628
964	0.0499828	108	806	14	0.0173697	0.12963	GO:0009612	GO:BP	response to mechanical stimulus	12913	4019	2.07681

## Sheet: T cells 3
	p_value	term_size	query_size	intersection_size	precision	recall	term_id	source	term_name	effective_domain_size	source_order	foldenrichment
1	7.82944e-17	93	139	21	0.151079	0.225806	GO:0006614	GO:BP	SRP-dependent cotranslational protein targeting to membrane	10186	2620	16.5472
2	1.0109e-16	97	139	21	0.151079	0.216495	GO:0006613	GO:BP	cotranslational protein targeting to membrane	10186	2619	15.8649
3	3.21383e-16	119	139	22	0.158273	0.184874	GO:0000184	GO:BP	nuclear-transcribed mRNA catabolic process, nonsense-mediated decay	10186	79	13.5477
4	4.48402e-16	107	139	21	0.151079	0.196262	GO:0045047	GO:BP	protein targeting to ER	10186	13202	14.3822
5	6.59177e-16	110	139	21	0.151079	0.190909	GO:0072599	GO:BP	establishment of protein localization to endoplasmic reticulum	10186	20550	13.9899
6	1.42308e-15	131	139	22	0.158273	0.167939	GO:0070972	GO:BP	protein localization to endoplasmic reticulum	10186	19336	12.3067
7	1.04555e-14	182	139	24	0.172662	0.131868	GO:0006413	GO:BP	translational initiation	10186	2437	9.66337
8	2.889e-14	171	139	23	0.165468	0.134503	GO:0019083	GO:BP	viral transcription	10186	6495	9.85645
9	8.35192e-14	201	139	24	0.172662	0.119403	GO:0000956	GO:BP	nuclear-transcribed mRNA catabolic process	10186	338	8.74992
10	1.07482e-13	163	139	22	0.158273	0.134969	GO:0006612	GO:BP	protein targeting to membrane	10186	2618	9.89063
11	1.7803e-13	188	139	23	0.165468	0.12234	GO:0019080	GO:BP	viral gene expression	10186	6492	8.96518
12	9.53844e-13	1334	139	55	0.395683	0.0412294	GO:0044419	GO:BP	interspecies interaction between organisms	10186	12890	3.02131
13	1.02048e-11	361	139	28	0.201439	0.0775623	GO:0006401	GO:BP	RNA catabolic process	10186	2426	5.68381
14	1.02048e-11	332	139	27	0.194245	0.0813253	GO:0006402	GO:BP	mRNA catabolic process	10186	2427	5.95956
15	1.18447e-11	554	139	34	0.244604	0.0613718	GO:0006412	GO:BP	translation	10186	2436	4.49736
16	2.07262e-11	566	139	34	0.244604	0.0600707	GO:0043043	GO:BP	peptide biosynthetic process	10186	12201	4.40201
17	7.722e-11	742	139	38	0.273381	0.0512129	GO:0016032	GO:BP	viral process	10186	5689	3.75291
18	8.11888e-11	1445	139	54	0.388489	0.0373702	GO:0071310	GO:BP	cellular response to organic substance	10186	19508	2.73851
19	1.69394e-10	265	139	23	0.165468	0.0867925	GO:0090150	GO:BP	establishment of protein localization to membrane	10186	21370	6.3602
20	1.69394e-10	764	139	38	0.273381	0.0497382	GO:0044403	GO:BP	symbiotic process	10186	12878	3.64485
21	2.40308e-10	449	139	29	0.208633	0.064588	GO:0034655	GO:BP	nucleobase-containing compound catabolic process	10186	10079	4.73304
22	2.97927e-10	1806	139	60	0.431655	0.0332226	GO:0010605	GO:BP	negative regulation of macromolecule metabolic process	10186	4792	2.43457
23	3.41187e-10	457	139	29	0.208633	0.0634573	GO:0072594	GO:BP	establishment of protein localization to organelle	10186	20545	4.65019
24	3.46028e-10	1763	139	59	0.42446	0.0334657	GO:0010033	GO:BP	response to organic substance	10186	4348	2.45238
25	3.9002e-10	461	139	29	0.208633	0.0629067	GO:0046700	GO:BP	heterocycle catabolic process	10186	14427	4.60984
26	4.17661e-10	463	139	29	0.208633	0.062635	GO:0044270	GO:BP	cellular nitrogen compound catabolic process	10186	12810	4.58993
27	4.60239e-10	1727	139	58	0.417266	0.0335843	GO:0070887	GO:BP	cellular response to chemical stimulus	10186	19275	2.46107
28	5.15318e-10	646	139	34	0.244604	0.0526316	GO:0006518	GO:BP	peptide metabolic process	10186	2526	3.85687
29	5.43413e-10	470	139	29	0.208633	0.0617021	GO:0019439	GO:BP	aromatic compound catabolic process	10186	6730	4.52157
30	5.77217e-10	1339	139	50	0.359712	0.0373413	GO:0010629	GO:BP	negative regulation of gene expression	10186	4815	2.73639
31	5.77533e-10	651	139	34	0.244604	0.0522273	GO:0071345	GO:BP	cellular response to cytokine stimulus	10186	19541	3.82725
32	6.39828e-10	475	139	29	0.208633	0.0610526	GO:1901361	GO:BP	organic cyclic compound catabolic process	10186	24677	4.47397
33	7.40397e-10	350	139	25	0.179856	0.0714286	GO:0006605	GO:BP	protein targeting	10186	2611	5.23433
34	7.40397e-10	659	139	34	0.244604	0.0515933	GO:0043604	GO:BP	amide biosynthetic process	10186	12533	3.78079
35	1.19251e-09	1938	139	61	0.438849	0.0314757	GO:0009892	GO:BP	negative regulation of metabolic process	10186	4253	2.30656
36	1.45046e-09	426	139	27	0.194245	0.0633803	GO:0072657	GO:BP	protein localization to membrane	10186	20566	4.64454
37	1.51657e-09	3017	139	79	0.568345	0.026185	GO:0048519	GO:BP	negative regulation of biological process	10186	14969	1.91885
38	4.77693e-09	708	139	34	0.244604	0.0480226	GO:0034097	GO:BP	response to cytokine	10186	9737	3.51912
39	9.78477e-09	2152	139	63	0.453237	0.0292751	GO:0042221	GO:BP	response to chemical	10186	11708	2.1453
40	1.0571e-08	1510	139	51	0.366906	0.0337748	GO:0007166	GO:BP	cell surface receptor signaling pathway	10186	3101	2.47504
41	2.84352e-08	453	139	26	0.18705	0.0573951	GO:0019221	GO:BP	cytokine-mediated signaling pathway	10186	6528	4.20595
42	5.06988e-08	3698	139	86	0.618705	0.0232558	GO:0060255	GO:BP	regulation of macromolecule metabolic process	10186	17183	1.7042
43	7.44684e-08	918	139	37	0.266187	0.040305	GO:0044265	GO:BP	cellular macromolecule catabolic process	10186	12807	2.95357
44	1.52958e-07	1034	139	39	0.280576	0.0377176	GO:0009057	GO:BP	macromolecule catabolic process	10186	3695	2.76397
45	1.69966e-07	815	139	34	0.244604	0.0417178	GO:0043603	GO:BP	cellular amide metabolic process	10186	12532	3.0571
46	1.76142e-07	3997	139	89	0.640288	0.0222667	GO:0019222	GO:BP	regulation of metabolic process	10186	6529	1.63172
47	5.86819e-07	727	139	31	0.223022	0.042641	GO:0033365	GO:BP	protein localization to organelle	10186	9468	3.12476
48	1.20426e-06	2854	139	70	0.503597	0.024527	GO:0010468	GO:BP	regulation of gene expression	10186	4690	1.79735
49	2.55561e-06	2230	139	59	0.42446	0.0264574	GO:0051641	GO:BP	cellular localization	10186	16140	1.93881
50	2.77604e-06	3502	139	79	0.568345	0.0225585	GO:0051179	GO:BP	localization	10186	15788	1.6531
51	8.37422e-06	1784	139	50	0.359712	0.0280269	GO:0002376	GO:BP	immune system process	10186	1046	2.05383
52	9.07973e-06	733	139	29	0.208633	0.0395634	GO:0016071	GO:BP	mRNA metabolic process	10186	5718	2.89923
53	1.00837e-05	4378	139	90	0.647482	0.0205573	GO:0050896	GO:BP	response to stimulus	10186	15547	1.50645
54	1.30505e-05	1813	139	50	0.359712	0.0275786	GO:0051649	GO:BP	establishment of localization in cell	10186	16148	2.02098
55	1.30505e-05	3219	139	73	0.52518	0.0226779	GO:0044267	GO:BP	cellular protein metabolic process	10186	12808	1.66185
56	1.42729e-05	1384	139	42	0.302158	0.0303468	GO:0070727	GO:BP	cellular macromolecule localization	10186	19186	2.22383
57	2.06371e-05	1564	139	45	0.323741	0.0287724	GO:0044248	GO:BP	cellular catabolic process	10186	12796	2.10846
58	2.16363e-05	813	139	30	0.215827	0.0369004	GO:0009607	GO:BP	response to biotic stimulus	10186	4014	2.70408
59	2.30055e-05	909	139	32	0.230216	0.0352035	GO:0006886	GO:BP	intracellular protein transport	10186	2863	2.57973
60	2.34546e-05	1256	139	39	0.280576	0.031051	GO:0006955	GO:BP	immune response	10186	2922	2.27543
61	3.03023e-05	3424	139	75	0.539568	0.0219042	GO:0019538	GO:BP	protein metabolic process	10186	6824	1.60515
62	3.13228e-05	1377	139	41	0.294964	0.0297749	GO:0034613	GO:BP	cellular protein localization	10186	10050	2.18192
63	3.13228e-05	5807	139	107	0.769784	0.018426	GO:0050789	GO:BP	regulation of biological process	10186	15458	1.35027
64	3.97566e-05	3587	139	77	0.553957	0.0214664	GO:0010467	GO:BP	gene expression	10186	4689	1.57307
65	3.97566e-05	795	139	29	0.208633	0.036478	GO:0051707	GO:BP	response to other organism	10186	16196	2.67313
66	3.97566e-05	795	139	29	0.208633	0.036478	GO:0043207	GO:BP	response to external biotic stimulus	10186	12295	2.67313
67	5.54592e-05	2264	139	56	0.402878	0.024735	GO:0006950	GO:BP	response to stress	10186	2918	1.81259
68	6.40183e-05	769	139	28	0.201439	0.0364109	GO:0042127	GO:BP	regulation of cell population proliferation	10186	11636	2.66821
69	6.9434e-05	2777	139	64	0.460432	0.0230465	GO:0006810	GO:BP	transport	10186	2800	1.68886
70	7.53997e-05	2848	139	65	0.467626	0.022823	GO:0051234	GO:BP	establishment of localization	10186	15832	1.67249
71	8.90725e-05	1439	139	41	0.294964	0.028492	GO:1901575	GO:BP	organic substance catabolic process	10186	24874	2.08791
72	9.17262e-05	2801	139	64	0.460432	0.022849	GO:0007165	GO:BP	signal transduction	10186	3100	1.67439
73	0.000117119	6105	139	109	0.784173	0.0178542	GO:0065007	GO:BP	biological regulation	10186	18770	1.30837
74	0.000136721	1631	139	44	0.316547	0.0269773	GO:0051246	GO:BP	regulation of protein metabolic process	10186	15841	1.97691
75	0.000149144	1750	139	46	0.330935	0.0262857	GO:0009056	GO:BP	catabolic process	10186	3694	1.92623
76	0.000186845	1540	139	42	0.302158	0.0272727	GO:0032268	GO:BP	regulation of cellular protein metabolic process	10186	8707	1.99856
77	0.000228823	923	139	30	0.215827	0.0325027	GO:0008283	GO:BP	cell population proliferation	10186	3602	2.38182
78	0.00023694	2015	139	50	0.359712	0.0248139	GO:0033036	GO:BP	macromolecule localization	10186	9271	1.81838
79	0.000265104	882	139	29	0.208633	0.0328798	GO:0002682	GO:BP	regulation of immune system process	10186	1351	2.40945
80	0.000336998	2977	139	65	0.467626	0.0218341	GO:0023052	GO:BP	signaling	10186	7708	1.60001
81	0.000336998	287	139	15	0.107914	0.0522648	GO:0043254	GO:BP	regulation of protein-containing complex assembly	10186	12307	3.83
82	0.000338752	3648	139	75	0.539568	0.0205592	GO:0051716	GO:BP	cellular response to stimulus	10186	16204	1.50659
83	0.000350201	897	139	29	0.208633	0.03233	GO:0001775	GO:BP	cell activation	10186	567	2.36916
84	0.000402138	2995	139	65	0.467626	0.0217028	GO:0007154	GO:BP	cell communication	10186	3089	1.5904
85	0.000417246	1540	139	41	0.294964	0.0266234	GO:0071705	GO:BP	nitrogen compound transport	10186	19851	1.95098
86	0.000492332	1837	139	46	0.330935	0.0250408	GO:0008104	GO:BP	protein localization	10186	3564	1.83501
87	0.000518396	587	139	22	0.158273	0.0374787	GO:0051338	GO:BP	regulation of transferase activity	10186	15918	2.74646
88	0.000518396	5534	139	100	0.719424	0.0180701	GO:0043170	GO:BP	macromolecule metabolic process	10186	12284	1.32419
89	0.000526119	1391	139	38	0.273381	0.0273185	GO:0015833	GO:BP	peptide transport	10186	5545	2.00191
90	0.000612436	1185	139	34	0.244604	0.028692	GO:1901566	GO:BP	organonitrogen compound biosynthetic process	10186	24866	2.10257
91	0.000643516	2655	139	59	0.42446	0.0222222	GO:0048523	GO:BP	negative regulation of cellular process	10186	14973	1.62846
92	0.000643516	1405	139	38	0.273381	0.0270463	GO:0042886	GO:BP	amide transport	10186	12117	1.98197
93	0.000675921	169	139	11	0.0791367	0.0650888	GO:0002237	GO:BP	response to molecule of bacterial origin	10186	908	4.76974
94	0.000694582	788	139	26	0.18705	0.0329949	GO:0002252	GO:BP	immune effector process	10186	922	2.41789
95	0.000723985	603	139	22	0.158273	0.0364842	GO:0044092	GO:BP	negative regulation of molecular function	10186	12734	2.67359
96	0.000732454	4886	139	91	0.654676	0.0186246	GO:0044260	GO:BP	cellular macromolecule metabolic process	10186	12804	1.36482
97	0.000732454	1042	139	31	0.223022	0.0297505	GO:0031399	GO:BP	regulation of protein modification process	10186	8362	2.18013
98	0.000803716	895	139	28	0.201439	0.0312849	GO:0048585	GO:BP	negative regulation of response to stimulus	10186	15025	2.29258
99	0.000836421	1316	139	36	0.258993	0.0273556	GO:0046907	GO:BP	intracellular transport	10186	14564	2.00464
100	0.000928419	27	139	5	0.0359712	0.185185	GO:0000027	GO:BP	ribosomal large subunit assembly	10186	14	13.5705
101	0.000937319	1379	139	37	0.266187	0.026831	GO:0015031	GO:BP	protein transport	10186	5392	1.96619
102	0.00102989	1441	139	38	0.273381	0.0263706	GO:0045184	GO:BP	establishment of protein localization	10186	13274	1.93245
103	0.0011858	120	139	9	0.0647482	0.075	GO:0034341	GO:BP	response to interferon-gamma	10186	9922	5.49604
104	0.00119829	449	139	18	0.129496	0.0400891	GO:0045859	GO:BP	regulation of protein kinase activity	10186	13695	2.93775
105	0.00123079	289	139	14	0.100719	0.0484429	GO:0009617	GO:BP	response to bacterium	10186	4023	3.54992
106	0.00126334	822	139	26	0.18705	0.0316302	GO:0045321	GO:BP	leukocyte activation	10186	13330	2.31788
107	0.00126334	69	139	7	0.0503597	0.101449	GO:0042273	GO:BP	ribosomal large subunit biogenesis	10186	11733	7.43426
108	0.00126914	3936	139	77	0.553957	0.019563	GO:1901564	GO:BP	organonitrogen compound metabolic process	10186	24864	1.43359
109	0.00131066	1689	139	42	0.302158	0.0248668	GO:0071702	GO:BP	organic substance transport	10186	19848	1.82225
110	0.00134944	499	139	19	0.136691	0.0380762	GO:0007167	GO:BP	enzyme linked receptor protein signaling pathway	10186	3102	2.79024
111	0.00134944	1352	139	36	0.258993	0.0266272	GO:0009605	GO:BP	response to external stimulus	10186	4012	1.95126
112	0.00134944	3060	139	64	0.460432	0.020915	GO:0009059	GO:BP	macromolecule biosynthetic process	10186	3697	1.53267
113	0.00134966	2995	139	63	0.453237	0.0210351	GO:0034645	GO:BP	cellular macromolecule biosynthetic process	10186	10073	1.54146
114	0.0013677	2997	139	63	0.453237	0.021021	GO:0044271	GO:BP	cellular nitrogen compound biosynthetic process	10186	12811	1.54043
115	0.00146525	188	139	11	0.0791367	0.0585106	GO:0051348	GO:BP	negative regulation of transferase activity	10186	15928	4.28769
116	0.00155664	298	139	14	0.100719	0.0469799	GO:0006417	GO:BP	regulation of translation	10186	2440	3.44271
117	0.00155664	506	139	19	0.136691	0.0375494	GO:0043549	GO:BP	regulation of kinase activity	10186	12496	2.75164
118	0.00157467	338	139	15	0.107914	0.0443787	GO:0043312	GO:BP	neutrophil degranulation	10186	12341	3.2521
119	0.00160139	339	139	15	0.107914	0.0442478	GO:0002283	GO:BP	neutrophil activation involved in immune response	10186	953	3.2425
120	0.00160139	645	139	22	0.158273	0.0341085	GO:0032269	GO:BP	negative regulation of cellular protein metabolic process	10186	8708	2.49949
121	0.00181506	846	139	26	0.18705	0.0307329	GO:0006952	GO:BP	defense response	10186	2919	2.25212
122	0.00192189	345	139	15	0.107914	0.0434783	GO:0042119	GO:BP	neutrophil activation	10186	11630	3.18611
123	0.00196962	346	139	15	0.107914	0.0433526	GO:0002446	GO:BP	neutrophil mediated immunity	10186	1116	3.1769
124	0.00201841	347	139	15	0.107914	0.0432277	GO:0036230	GO:BP	granulocyte activation	10186	11022	3.16775
125	0.00210192	2031	139	47	0.338129	0.0231413	GO:0010604	GO:BP	positive regulation of macromolecule metabolic process	10186	4791	1.69581
126	0.00210192	164	139	10	0.0719424	0.0609756	GO:0032496	GO:BP	response to lipopolysaccharide	10186	8867	4.46833
127	0.00227185	860	139	26	0.18705	0.0302326	GO:1901700	GO:BP	response to oxygen-containing compound	10186	24977	2.21546
128	0.00250984	668	139	22	0.158273	0.0329341	GO:0016477	GO:BP	cell migration	10186	5867	2.41343
129	0.00264304	1520	139	38	0.273381	0.025	GO:0031324	GO:BP	negative regulation of cellular metabolic process	10186	8321	1.83201
130	0.00264975	720	139	23	0.165468	0.0319444	GO:0048870	GO:BP	cell motility	10186	15289	2.34091
131	0.00264975	720	139	23	0.165468	0.0319444	GO:0051674	GO:BP	localization of cell	10186	16170	2.34091
132	0.00272597	108	139	8	0.057554	0.0740741	GO:0071346	GO:BP	cellular response to interferon-gamma	10186	19542	5.42819
133	0.00272597	19	139	4	0.028777	0.210526	GO:0033137	GO:BP	negative regulation of peptidyl-serine phosphorylation	10186	9333	15.4275
134	0.00272597	2180	139	49	0.352518	0.0224771	GO:0009893	GO:BP	positive regulation of metabolic process	10186	4254	1.64713
135	0.00276018	171	139	10	0.0719424	0.0584795	GO:0071356	GO:BP	cellular response to tumor necrosis factor	10186	19552	4.28541
136	0.00276018	675	139	22	0.158273	0.0325926	GO:0051248	GO:BP	negative regulation of protein metabolic process	10186	15843	2.3884
137	0.00321578	8	139	3	0.0215827	0.375	GO:0002480	GO:BP	antigen processing and presentation of exogenous peptide antigen via MHC class I, TAP-independent	10186	1150	27.4802
138	0.0032825	884	139	26	0.18705	0.0294118	GO:0043067	GO:BP	regulation of programmed cell death	10186	12224	2.15531
139	0.00357136	369	139	15	0.107914	0.0406504	GO:0043299	GO:BP	leukocyte degranulation	10186	12328	2.97889
140	0.00394799	3319	139	66	0.47482	0.0198855	GO:0048518	GO:BP	positive regulation of biological process	10186	14968	1.45722
141	0.00394799	743	139	23	0.165468	0.0309556	GO:0001932	GO:BP	regulation of protein phosphorylation	10186	677	2.26844
142	0.00402379	599	139	20	0.143885	0.033389	GO:0007155	GO:BP	cell adhesion	10186	3090	2.44676
143	0.00402379	374	139	15	0.107914	0.040107	GO:0002275	GO:BP	myeloid cell activation involved in immune response	10186	945	2.93906
144	0.00407392	1502	139	37	0.266187	0.0246338	GO:0051239	GO:BP	regulation of multicellular organismal process	10186	15837	1.80518
145	0.00407392	600	139	20	0.143885	0.0333333	GO:0022610	GO:BP	biological adhesion	10186	7658	2.44269
146	0.00414149	1059	139	29	0.208633	0.0273843	GO:0006468	GO:BP	protein phosphorylation	10186	2480	2.00674
147	0.00414149	900	139	26	0.18705	0.0288889	GO:0032270	GO:BP	positive regulation of cellular protein metabolic process	10186	8709	2.11699
148	0.00414149	2	139	2	0.0143885	1	GO:0150111	GO:BP	regulation of transepithelial transport	10186	23311	73.2806
149	0.00414149	2225	139	49	0.352518	0.0220225	GO:0048583	GO:BP	regulation of response to stimulus	10186	15023	1.61382
150	0.004158	954	139	27	0.194245	0.0283019	GO:0010941	GO:BP	regulation of cell death	10186	5104	2.07398
151	0.004158	377	139	15	0.107914	0.0397878	GO:0098609	GO:BP	cell-cell adhesion	10186	22211	2.91567
152	0.00424037	701	139	22	0.158273	0.0313837	GO:0009628	GO:BP	response to abiotic stimulus	10186	4031	2.29982
153	0.00428237	466	139	17	0.122302	0.0364807	GO:0000165	GO:BP	MAPK cascade	10186	72	2.67333
154	0.00430662	1118	139	30	0.215827	0.0268336	GO:0006915	GO:BP	apoptotic process	10186	2889	1.96638
155	0.00432015	854	139	25	0.179856	0.029274	GO:0042325	GO:BP	regulation of phosphorylation	10186	11756	2.14522
156	0.00433756	907	139	26	0.18705	0.0286659	GO:0006928	GO:BP	movement of cell or subcellular component	10186	2900	2.10066
157	0.00433756	184	139	10	0.0719424	0.0543478	GO:0034612	GO:BP	response to tumor necrosis factor	10186	10049	3.98264
158	0.00433756	959	139	27	0.194245	0.0281543	GO:0051247	GO:BP	positive regulation of protein metabolic process	10186	15842	2.06317
159	0.00438487	608	139	20	0.143885	0.0328947	GO:0098542	GO:BP	defense response to other organism	10186	22200	2.41055
160	0.00438487	424	139	16	0.115108	0.0377358	GO:0043086	GO:BP	negative regulation of catalytic activity	10186	12230	2.7653
161	0.00439651	339	139	14	0.100719	0.0412979	GO:0034248	GO:BP	regulation of cellular amide metabolic process	10186	9864	3.02634
162	0.00458977	471	139	17	0.122302	0.0360934	GO:0023014	GO:BP	signal transduction by protein phosphorylation	10186	7683	2.64495
163	0.0046505	152	139	9	0.0647482	0.0592105	GO:0006469	GO:BP	negative regulation of protein kinase activity	10186	2481	4.33898
164	0.00467488	384	139	15	0.107914	0.0390625	GO:0002444	GO:BP	myeloid leukocyte mediated immunity	10186	1114	2.86252
165	0.00479747	429	139	16	0.115108	0.037296	GO:0030334	GO:BP	regulation of cell migration	10186	7873	2.73308
166	0.00479747	153	139	9	0.0647482	0.0588235	GO:0050870	GO:BP	positive regulation of T cell activation	10186	15526	4.31062
167	0.00486978	1411	139	35	0.251799	0.0248051	GO:0051172	GO:BP	negative regulation of nitrogen compound metabolic process	10186	15781	1.81773
168	0.00486978	430	139	16	0.115108	0.0372093	GO:0002274	GO:BP	myeloid leukocyte activation	10186	944	2.72672
169	0.00527672	870	139	25	0.179856	0.0287356	GO:0042981	GO:BP	regulation of apoptotic process	10186	12160	2.10576
170	0.00528497	93	139	7	0.0503597	0.0752688	GO:0002181	GO:BP	cytoplasmic translation	10186	865	5.51574
171	0.00541114	10	139	3	0.0215827	0.3	GO:0019885	GO:BP	antigen processing and presentation of endogenous peptide antigen via MHC class I	10186	7053	21.9842
172	0.00571286	3042	139	61	0.438849	0.0200526	GO:0048522	GO:BP	positive regulation of cellular process	10186	14972	1.46947
173	0.00587041	2913	139	59	0.42446	0.020254	GO:0016070	GO:BP	RNA metabolic process	10186	5717	1.48423
174	0.00587429	1146	139	30	0.215827	0.026178	GO:0012501	GO:BP	programmed cell death	10186	5159	1.91834
175	0.00626301	397	139	15	0.107914	0.0377834	GO:0031400	GO:BP	negative regulation of protein modification process	10186	8363	2.76879
176	0.00640028	488	139	17	0.122302	0.0348361	GO:0051270	GO:BP	regulation of cellular component movement	10186	15859	2.55281
177	0.00642663	884	139	25	0.179856	0.0282805	GO:0080134	GO:BP	regulation of response to stress	10186	21076	2.07241
178	0.00671374	1268	139	32	0.230216	0.0252366	GO:0050793	GO:BP	regulation of developmental process	10186	15461	1.84935
179	0.00676278	784	139	23	0.165468	0.0293367	GO:0040011	GO:BP	locomotion	10186	11538	2.14981
180	0.0069978	11	139	3	0.0215827	0.272727	GO:1900102	GO:BP	negative regulation of endoplasmic reticulum unfolded protein response	10186	23460	19.9856
181	0.00706116	1217	139	31	0.223022	0.0254725	GO:0008219	GO:BP	cell death	10186	3595	1.86664
182	0.00706116	46	139	5	0.0359712	0.108696	GO:2001244	GO:BP	positive regulation of intrinsic apoptotic signaling pathway	10186	30457	7.96528
183	0.00711213	788	139	23	0.165468	0.0291878	GO:0009888	GO:BP	tissue development	10186	4249	2.1389
184	0.00724196	164	139	9	0.0647482	0.054878	GO:0031334	GO:BP	positive regulation of protein-containing complex assembly	10186	8330	4.02149
185	0.00749096	165	139	9	0.0647482	0.0545455	GO:0033673	GO:BP	negative regulation of kinase activity	10186	9670	3.99712
186	0.00749096	451	139	16	0.115108	0.0354767	GO:2000145	GO:BP	regulation of cell motility	10186	29415	2.59975
187	0.00755147	279	139	12	0.0863309	0.0430108	GO:0042326	GO:BP	negative regulation of phosphorylation	10186	11757	3.15185
188	0.00774673	166	139	9	0.0647482	0.0542169	GO:1903039	GO:BP	positive regulation of leukocyte cell-cell adhesion	10186	26175	3.97304
189	0.00858406	749	139	22	0.158273	0.0293725	GO:0010648	GO:BP	negative regulation of cell communication	10186	4834	2.15243
190	0.00869989	505	139	17	0.122302	0.0336634	GO:0045087	GO:BP	innate immune response	10186	13230	2.46687
191	0.00869989	12	139	3	0.0215827	0.25	GO:0010225	GO:BP	response to UV-C	10186	4522	18.3201
192	0.00869989	854	139	24	0.172662	0.028103	GO:2000113	GO:BP	negative regulation of cellular macromolecule biosynthetic process	10186	29383	2.05941
193	0.00871718	751	139	22	0.158273	0.0292943	GO:0023057	GO:BP	negative regulation of signaling	10186	7713	2.1467
194	0.00879519	962	139	26	0.18705	0.027027	GO:0019220	GO:BP	regulation of phosphate metabolic process	10186	6527	1.98056
195	0.00879519	170	139	9	0.0647482	0.0529412	GO:0032102	GO:BP	negative regulation of response to external stimulus	10186	8607	3.87956
196	0.00879519	962	139	26	0.18705	0.027027	GO:0051174	GO:BP	regulation of phosphorus metabolic process	10186	15783	1.98056
197	0.00879519	1409	139	34	0.244604	0.0241306	GO:0016310	GO:BP	phosphorylation	10186	5827	1.7683
198	0.00900667	3	139	2	0.0143885	0.666667	GO:0006880	GO:BP	intracellular sequestering of iron ion	10186	2857	48.8537
199	0.00900667	3	139	2	0.0143885	0.666667	GO:0002486	GO:BP	antigen processing and presentation of endogenous peptide antigen via MHC class I via ER pathway, TAP-independent	10186	1156	48.8537
200	0.00900667	329	139	13	0.0935252	0.0395137	GO:0008285	GO:BP	negative regulation of cell population proliferation	10186	3604	2.89559
201	0.00900667	3	139	2	0.0143885	0.666667	GO:0002484	GO:BP	antigen processing and presentation of endogenous peptide antigen via MHC class I via ER pathway	10186	1154	48.8537
202	0.00900667	3	139	2	0.0143885	0.666667	GO:0070427	GO:BP	nucleotide-binding oligomerization domain containing 1 signaling pathway	10186	19013	48.8537
203	0.00900667	3	139	2	0.0143885	0.666667	GO:0097577	GO:BP	sequestering of iron ion	10186	22094	48.8537
204	0.00924251	418	139	15	0.107914	0.0358852	GO:0001817	GO:BP	regulation of cytokine production	10186	601	2.62969
205	0.00942934	331	139	13	0.0935252	0.0392749	GO:0042110	GO:BP	T cell activation	10186	11625	2.87809
206	0.00943888	465	139	16	0.115108	0.0344086	GO:0040012	GO:BP	regulation of locomotion	10186	11539	2.52148
207	0.0103382	13	139	3	0.0215827	0.230769	GO:0002483	GO:BP	antigen processing and presentation of endogenous peptide antigen	10186	1153	16.9109
208	0.0105078	1312	139	32	0.230216	0.0243902	GO:0010628	GO:BP	positive regulation of gene expression	10186	4814	1.78733
209	0.0106363	566	139	18	0.129496	0.0318021	GO:0050776	GO:BP	regulation of immune response	10186	15450	2.33048
210	0.0106363	471	139	16	0.115108	0.0339703	GO:0001816	GO:BP	cytokine production	10186	600	2.48936
211	0.0110181	254	139	11	0.0791367	0.0433071	GO:0001933	GO:BP	negative regulation of protein phosphorylation	10186	678	3.17357
212	0.0115783	1554	139	36	0.258993	0.023166	GO:0048513	GO:BP	animal organ development	10186	14963	1.69762
213	0.0118015	179	139	9	0.0647482	0.0502793	GO:1903320	GO:BP	regulation of protein modification by small protein conjugation or removal	10186	26411	3.6845
214	0.0121668	180	139	9	0.0647482	0.05	GO:0022409	GO:BP	positive regulation of cell-cell adhesion	10186	7640	3.66403
215	0.0121668	6624	139	108	0.776978	0.0163043	GO:0008152	GO:BP	metabolic process	10186	3566	1.19479
216	0.0125341	54	139	5	0.0359712	0.0925926	GO:0070936	GO:BP	protein K48-linked ubiquitination	10186	19308	6.78524
217	0.0131337	1626	139	37	0.266187	0.0227552	GO:0065009	GO:BP	regulation of molecular function	10186	18772	1.66752
218	0.0133326	221	139	10	0.0719424	0.0452489	GO:0002696	GO:BP	positive regulation of leukocyte activation	10186	1365	3.31586
219	0.0133326	346	139	13	0.0935252	0.0375723	GO:0045936	GO:BP	negative regulation of phosphate metabolic process	10186	13766	2.75332
220	0.0135715	890	139	24	0.172662	0.0269663	GO:0010558	GO:BP	negative regulation of macromolecule biosynthetic process	10186	4750	1.97611
221	0.0135715	347	139	13	0.0935252	0.037464	GO:0010563	GO:BP	negative regulation of phosphorus metabolic process	10186	4755	2.74538
222	0.0135969	222	139	10	0.0719424	0.045045	GO:0050863	GO:BP	regulation of T cell activation	10186	15519	3.30093
223	0.0145375	115	139	7	0.0503597	0.0608696	GO:0071347	GO:BP	cellular response to interleukin-1	10186	19543	4.46056
224	0.0145597	488	139	16	0.115108	0.0327869	GO:0002366	GO:BP	leukocyte activation involved in immune response	10186	1036	2.40264
225	0.0147661	15	139	3	0.0215827	0.2	GO:0019883	GO:BP	antigen processing and presentation of endogenous antigen	10186	7051	14.6561
226	0.0147661	15	139	3	0.0215827	0.2	GO:0032495	GO:BP	response to muramyl dipeptide	10186	8866	14.6561
227	0.0148703	490	139	16	0.115108	0.0326531	GO:0002263	GO:BP	cell activation involved in immune response	10186	933	2.39284
228	0.0148703	3244	139	62	0.446043	0.0191122	GO:0090304	GO:BP	nucleic acid metabolic process	10186	21522	1.40055
229	0.0148703	538	139	17	0.122302	0.0315985	GO:0051241	GO:BP	negative regulation of multicellular organismal process	10186	15839	2.31556
230	0.014974	638	139	19	0.136691	0.0297806	GO:0031401	GO:BP	positive regulation of protein modification process	10186	8364	2.18234
231	0.014974	226	139	10	0.0719424	0.0442478	GO:0050867	GO:BP	positive regulation of cell activation	10186	15523	3.2425
232	0.0156205	4	139	2	0.0143885	0.5	GO:1903898	GO:BP	negative regulation of PERK-mediated unfolded protein response	10186	26937	36.6403
233	0.0162718	1833	139	40	0.28777	0.0218221	GO:0051173	GO:BP	positive regulation of nitrogen compound metabolic process	10186	15782	1.59914
234	0.0164178	153	139	8	0.057554	0.0522876	GO:0031396	GO:BP	regulation of protein ubiquitination	10186	8359	3.83166
235	0.0168188	497	139	16	0.115108	0.0321932	GO:0010608	GO:BP	posttranscriptional regulation of gene expression	10186	4795	2.35913
236	0.0170142	16	139	3	0.0215827	0.1875	GO:0070262	GO:BP	peptidyl-serine dephosphorylation	10186	18915	13.7401
237	0.0170142	16	139	3	0.0215827	0.1875	GO:0042104	GO:BP	positive regulation of activated T cell proliferation	10186	11621	13.7401
238	0.0170142	59	139	5	0.0359712	0.0847458	GO:0050688	GO:BP	regulation of defense response to virus	10186	15402	6.21022
239	0.0170142	1302	139	31	0.223022	0.0238095	GO:0050790	GO:BP	regulation of catalytic activity	10186	15459	1.74478
240	0.0173273	35	139	4	0.028777	0.114286	GO:0042059	GO:BP	negative regulation of epidermal growth factor receptor signaling pathway	10186	11593	8.37492
241	0.0173273	88	139	6	0.0431655	0.0681818	GO:0071901	GO:BP	negative regulation of protein serine/threonine kinase activity	10186	19969	4.9964
242	0.0178635	6284	139	103	0.741007	0.0163908	GO:0071704	GO:BP	organic substance metabolic process	10186	19850	1.20113
243	0.0178773	121	139	7	0.0503597	0.0578512	GO:0033209	GO:BP	tumor necrosis factor-mediated signaling pathway	10186	9364	4.23937
244	0.0178773	121	139	7	0.0503597	0.0578512	GO:0071216	GO:BP	cellular response to biotic stimulus	10186	19418	4.23937
245	0.0178773	60	139	5	0.0359712	0.0833333	GO:0042255	GO:BP	ribosome assembly	10186	11721	6.10671
246	0.0181684	916	139	24	0.172662	0.0262009	GO:0031327	GO:BP	negative regulation of cellular biosynthetic process	10186	8324	1.92002
247	0.0184237	122	139	7	0.0503597	0.057377	GO:0031348	GO:BP	negative regulation of defense response	10186	8344	4.20462
248	0.0184237	319	139	12	0.0863309	0.0376176	GO:0071363	GO:BP	cellular response to growth factor stimulus	10186	19559	2.75664
249	0.0184237	705	139	20	0.143885	0.0283688	GO:0009968	GO:BP	negative regulation of signal transduction	10186	4309	2.07888
250	0.0186248	3349	139	63	0.453237	0.0188116	GO:0051171	GO:BP	regulation of nitrogen compound metabolic process	10186	15780	1.37852
251	0.0186561	604	139	18	0.129496	0.0298013	GO:0002684	GO:BP	positive regulation of immune system process	10186	1353	2.18386
252	0.0202797	368	139	13	0.0935252	0.0353261	GO:0007169	GO:BP	transmembrane receptor protein tyrosine kinase signaling pathway	10186	3104	2.58872
253	0.02033	37	139	4	0.028777	0.108108	GO:0070527	GO:BP	platelet aggregation	10186	19071	7.92222
254	0.0206931	92	139	6	0.0431655	0.0652174	GO:0031333	GO:BP	negative regulation of protein-containing complex assembly	10186	8329	4.77917
255	0.0208798	1927	139	41	0.294964	0.0212766	GO:0031325	GO:BP	positive regulation of cellular metabolic process	10186	8322	1.55916
256	0.0209327	3162	139	60	0.431655	0.0189753	GO:0032501	GO:BP	multicellular organismal process	10186	8871	1.39052
257	0.0211073	612	139	18	0.129496	0.0294118	GO:1901701	GO:BP	cellular response to oxygen-containing compound	10186	24978	2.15531
258	0.0214386	93	139	6	0.0431655	0.0645161	GO:0042542	GO:BP	response to hydrogen peroxide	10186	11906	4.72778
259	0.0214386	93	139	6	0.0431655	0.0645161	GO:0009612	GO:BP	response to mechanical stimulus	10186	4019	4.72778
260	0.0214386	931	139	24	0.172662	0.0257787	GO:0009890	GO:BP	negative regulation of biosynthetic process	10186	4251	1.88908
261	0.0217946	38	139	4	0.028777	0.105263	GO:1901185	GO:BP	negative regulation of ERBB signaling pathway	10186	24515	7.71374
262	0.0220007	18	139	3	0.0215827	0.166667	GO:0006123	GO:BP	mitochondrial electron transport, cytochrome c to oxygen	10186	2179	12.2134
263	0.0220007	467	139	15	0.107914	0.0321199	GO:0045055	GO:BP	regulated exocytosis	10186	13210	2.35377
264	0.0220007	18	139	3	0.0215827	0.166667	GO:0019646	GO:BP	aerobic electron transport chain	10186	6923	12.2134
265	0.0225032	5	139	2	0.0143885	0.4	GO:1900122	GO:BP	positive regulation of receptor binding	10186	23480	29.3122
266	0.0225032	5	139	2	0.0143885	0.4	GO:1904688	GO:BP	regulation of cytoplasmic translational initiation	10186	27670	29.3122
267	0.0228142	2384	139	48	0.345324	0.0201342	GO:0007275	GO:BP	multicellular organism development	10186	3201	1.47545
268	0.022982	3590	139	66	0.47482	0.0183844	GO:0031323	GO:BP	regulation of cellular metabolic process	10186	8320	1.34722
269	0.022982	519	139	16	0.115108	0.0308285	GO:0032101	GO:BP	regulation of response to external stimulus	10186	8606	2.25913
270	0.0230378	331	139	12	0.0863309	0.0362538	GO:0070848	GO:BP	response to growth factor	10186	19256	2.6567
271	0.0230378	3453	139	64	0.460432	0.0185346	GO:0080090	GO:BP	regulation of primary metabolic process	10186	21057	1.35823
272	0.0230594	39	139	4	0.028777	0.102564	GO:0032663	GO:BP	regulation of interleukin-2 production	10186	8976	7.51596
273	0.0240967	130	139	7	0.0503597	0.0538462	GO:0034250	GO:BP	positive regulation of cellular amide metabolic process	10186	9866	3.94588
274	0.0240967	130	139	7	0.0503597	0.0538462	GO:0070555	GO:BP	response to interleukin-1	10186	19083	3.94588
275	0.0244161	206	139	9	0.0647482	0.0436893	GO:0051251	GO:BP	positive regulation of lymphocyte activation	10186	15846	3.20158
276	0.0251729	525	139	16	0.115108	0.0304762	GO:0002443	GO:BP	leukocyte mediated immunity	10186	1113	2.23331
277	0.0260006	132	139	7	0.0503597	0.0530303	GO:0035967	GO:BP	cellular response to topologically incorrect protein	10186	10859	3.88609
278	0.0266502	209	139	9	0.0647482	0.0430622	GO:1903037	GO:BP	regulation of leukocyte cell-cell adhesion	10186	26173	3.15562
279	0.0269101	41	139	4	0.028777	0.097561	GO:0010803	GO:BP	regulation of tumor necrosis factor-mediated signaling pathway	10186	4981	7.14932
280	0.0269101	294	139	11	0.0791367	0.037415	GO:0071900	GO:BP	regulation of protein serine/threonine kinase activity	10186	19968	2.74179
281	0.0269101	897	139	23	0.165468	0.025641	GO:0045595	GO:BP	regulation of cell differentiation	10186	13447	1.87899
282	0.0269749	789	139	21	0.151079	0.026616	GO:0051726	GO:BP	regulation of cell cycle	10186	16206	1.95043
283	0.0270069	99	139	6	0.0431655	0.0606061	GO:0071222	GO:BP	cellular response to lipopolysaccharide	10186	19424	4.44125
284	0.027184	295	139	11	0.0791367	0.0372881	GO:0051249	GO:BP	regulation of lymphocyte activation	10186	15844	2.7325
285	0.027184	5507	139	92	0.661871	0.016706	GO:0050794	GO:BP	regulation of cellular process	10186	15462	1.22423
286	0.02758	211	139	9	0.0647482	0.042654	GO:1902903	GO:BP	regulation of supramolecular fiber organization	10186	26049	3.12571
287	0.02758	434	139	14	0.100719	0.0322581	GO:0010942	GO:BP	positive regulation of cell death	10186	5105	2.36389
288	0.0276186	20	139	3	0.0215827	0.15	GO:0002507	GO:BP	tolerance induction	10186	1176	10.9921
289	0.0285254	254	139	10	0.0719424	0.0393701	GO:0002683	GO:BP	negative regulation of immune system process	10186	1352	2.88506
290	0.0305478	102	139	6	0.0431655	0.0588235	GO:0071219	GO:BP	cellular response to molecule of bacterial origin	10186	19421	4.31062
291	0.0305478	6	139	2	0.0143885	0.333333	GO:0070424	GO:BP	regulation of nucleotide-binding oligomerization domain containing signaling pathway	10186	19010	24.4269
292	0.0305478	3637	139	66	0.47482	0.0181468	GO:0044249	GO:BP	cellular biosynthetic process	10186	12797	1.32981
293	0.031625	71	139	5	0.0359712	0.0704225	GO:0050728	GO:BP	negative regulation of inflammatory response	10186	15414	5.1606
294	0.0323231	804	139	21	0.151079	0.0261194	GO:0009719	GO:BP	response to endogenous stimulus	10186	4102	1.91404
295	0.0323231	303	139	11	0.0791367	0.0363036	GO:0010035	GO:BP	response to inorganic substance	10186	4350	2.66035
296	0.0330704	44	139	4	0.028777	0.0909091	GO:0034109	GO:BP	homotypic cell-cell adhesion	10186	9746	6.66187
297	0.0330704	44	139	4	0.028777	0.0909091	GO:0051591	GO:BP	response to cAMP	10186	16094	6.66187
298	0.0340485	219	139	9	0.0647482	0.0410959	GO:0016579	GO:BP	protein deubiquitination	10186	5906	3.01153
299	0.034492	496	139	15	0.107914	0.0302419	GO:0060429	GO:BP	epithelium development	10186	17347	2.21615
300	0.0348637	220	139	9	0.0647482	0.0409091	GO:0050900	GO:BP	leukocyte migration	10186	15550	2.99784
301	0.0350911	448	139	14	0.100719	0.03125	GO:0033993	GO:BP	response to lipid	10186	9700	2.29002
302	0.0356571	106	139	6	0.0431655	0.0566038	GO:0001959	GO:BP	regulation of cytokine-mediated signaling pathway	10186	699	4.14796
303	0.03694	1096	139	26	0.18705	0.0237226	GO:0065003	GO:BP	protein-containing complex assembly	10186	18767	1.73841
304	0.03694	143	139	7	0.0503597	0.048951	GO:0000302	GO:BP	response to reactive oxygen species	10186	136	3.58716
305	0.03694	403	139	13	0.0935252	0.0322581	GO:0043065	GO:BP	positive regulation of apoptotic process	10186	12222	2.36389
306	0.03694	107	139	6	0.0431655	0.0560748	GO:0045727	GO:BP	positive regulation of translation	10186	13575	4.10919
307	0.0388025	312	139	11	0.0791367	0.0352564	GO:1903706	GO:BP	regulation of hemopoiesis	10186	26780	2.58361
308	0.0390899	406	139	13	0.0935252	0.0320197	GO:0043068	GO:BP	positive regulation of programmed cell death	10186	12225	2.34642
309	0.0393206	7	139	2	0.0143885	0.285714	GO:0099188	GO:BP	postsynaptic cytoskeleton organization	10186	22518	20.9373
310	0.0393206	7	139	2	0.0143885	0.285714	GO:0098974	GO:BP	postsynaptic actin cytoskeleton organization	10186	22408	20.9373
311	0.0393206	7	139	2	0.0143885	0.285714	GO:0036491	GO:BP	regulation of translation initiation in response to endoplasmic reticulum stress	10186	11170	20.9373
312	0.0393206	7	139	2	0.0143885	0.285714	GO:0051238	GO:BP	sequestering of metal ion	10186	15836	20.9373
313	0.0393206	7	139	2	0.0143885	0.285714	GO:0070431	GO:BP	nucleotide-binding oligomerization domain containing 2 signaling pathway	10186	19017	20.9373
314	0.0393206	7	139	2	0.0143885	0.285714	GO:0061043	GO:BP	regulation of vascular wound healing	10186	17938	20.9373
315	0.0396992	47	139	4	0.028777	0.0851064	GO:0032623	GO:BP	interleukin-2 production	10186	8936	6.23664
316	0.0405898	1829	139	38	0.273381	0.0207764	GO:0030154	GO:BP	cell differentiation	10186	7776	1.52251
317	0.041532	1403	139	31	0.223022	0.0220955	GO:0033554	GO:BP	cellular response to stress	10186	9586	1.61917
318	0.0423191	48	139	4	0.028777	0.0833333	GO:0010469	GO:BP	regulation of signaling receptor activity	10186	4691	6.10671
319	0.0423191	3692	139	66	0.47482	0.0178765	GO:1901576	GO:BP	organic substance biosynthetic process	10186	24875	1.31
320	0.0431029	365	139	12	0.0863309	0.0328767	GO:0097435	GO:BP	supramolecular fiber organization	10186	22048	2.40922
321	0.0431029	273	139	10	0.0719424	0.03663	GO:0009314	GO:BP	response to radiation	10186	3929	2.68427
322	0.0431029	563	139	16	0.115108	0.0284192	GO:0044087	GO:BP	regulation of cellular component biogenesis	10186	12729	2.08257
323	0.0444348	189	139	8	0.057554	0.042328	GO:0009416	GO:BP	response to light stimulus	10186	3956	3.10182
324	0.045332	150	139	7	0.0503597	0.0466667	GO:0007178	GO:BP	transmembrane receptor protein serine/threonine kinase signaling pathway	10186	3112	3.41976
325	0.0466943	25	139	3	0.0215827	0.12	GO:0046006	GO:BP	regulation of activated T cell proliferation	10186	13834	8.79367
326	0.0466943	25	139	3	0.0215827	0.12	GO:1900101	GO:BP	regulation of endoplasmic reticulum unfolded protein response	10186	23459	8.79367
327	0.0466943	233	139	9	0.0647482	0.0386266	GO:0007159	GO:BP	leukocyte cell-cell adhesion	10186	3094	2.83058
328	0.0468805	3571	139	64	0.460432	0.0179222	GO:0006139	GO:BP	nucleobase-containing compound metabolic process	10186	2192	1.31335
329	0.0480071	371	139	12	0.0863309	0.032345	GO:0055082	GO:BP	cellular chemical homeostasis	10186	16935	2.37026
330	0.0481869	3715	139	66	0.47482	0.0177658	GO:0009058	GO:BP	biosynthetic process	10186	3696	1.30189
331	0.0484136	8	139	2	0.0143885	0.25	GO:1903897	GO:BP	regulation of PERK-mediated unfolded protein response	10186	26936	18.3201
332	0.0484136	235	139	9	0.0647482	0.0382979	GO:0070646	GO:BP	protein modification by small protein removal	10186	19140	2.80649
333	0.0484136	8	139	2	0.0143885	0.25	GO:0006924	GO:BP	activation-induced cell death of T cells	10186	2896	18.3201
334	0.0484136	8	139	2	0.0143885	0.25	GO:0032056	GO:BP	positive regulation of translation in response to stress	10186	8568	18.3201
335	0.0484136	115	139	6	0.0431655	0.0521739	GO:0060759	GO:BP	regulation of response to cytokine stimulus	10186	17666	3.82333
336	0.0484136	115	139	6	0.0431655	0.0521739	GO:0034620	GO:BP	cellular response to unfolded protein	10186	10053	3.82333
337	0.0484136	8	139	2	0.0143885	0.25	GO:0002664	GO:BP	regulation of T cell tolerance induction	10186	1333	18.3201
338	0.0499925	281	139	10	0.0719424	0.0355872	GO:0006979	GO:BP	response to oxidative stress	10186	2942	2.60785

## Sheet: Plasmacytoid DCs
	p_value	term_size	query_size	intersection_size	precision	recall	term_id	source	term_name	effective_domain_size	source_order	foldenrichment
1	4.11268e-05	546	61	18	0.295082	0.032967	GO:0071345	GO:BP	cellular response to cytokine stimulus	8376	19541	4.52675
2	4.11268e-05	594	61	19	0.311475	0.0319865	GO:0034097	GO:BP	response to cytokine	8376	9737	4.39212
3	0.000246533	1496	61	28	0.459016	0.0187166	GO:0070887	GO:BP	cellular response to chemical stimulus	8376	19275	2.57
4	0.000246533	1484	61	28	0.459016	0.0188679	GO:0002376	GO:BP	immune system process	8376	1046	2.59078
5	0.000305701	1943	61	32	0.52459	0.0164694	GO:0006950	GO:BP	response to stress	8376	2918	2.26143
6	0.000305701	824	61	20	0.327869	0.0242718	GO:0010941	GO:BP	regulation of cell death	8376	5104	3.3328
7	0.000391523	1880	61	31	0.508197	0.0164894	GO:0042221	GO:BP	response to chemical	8376	11708	2.26418
8	0.000959763	667	61	17	0.278689	0.0254873	GO:0009888	GO:BP	tissue development	8376	4249	3.49969
9	0.000959763	746	61	18	0.295082	0.0241287	GO:0042981	GO:BP	regulation of apoptotic process	8376	12160	3.31315
10	0.00110493	759	61	18	0.295082	0.0237154	GO:0043067	GO:BP	regulation of programmed cell death	8376	12224	3.2564
11	0.00202996	1070	61	21	0.344262	0.0196262	GO:0008219	GO:BP	cell death	8376	3595	2.6949
12	0.00202996	504	61	14	0.229508	0.0277778	GO:0006412	GO:BP	translation	8376	2436	3.81421
13	0.00202996	726	61	17	0.278689	0.023416	GO:0002682	GO:BP	regulation of immune system process	8376	1351	3.21528
14	0.00202996	507	61	14	0.229508	0.0276134	GO:0048534	GO:BP	hematopoietic or lymphoid organ development	8376	14982	3.79164
15	0.00202996	1554	61	26	0.42623	0.016731	GO:0010033	GO:BP	response to organic substance	8376	4348	2.29736
16	0.00216083	381	61	12	0.196721	0.0314961	GO:0019221	GO:BP	cytokine-mediated signaling pathway	8376	6528	4.32477
17	0.00216083	516	61	14	0.229508	0.0271318	GO:0043043	GO:BP	peptide biosynthetic process	8376	12201	3.72551
18	0.00216083	587	61	15	0.245902	0.0255537	GO:0043604	GO:BP	amide biosynthetic process	8376	12533	3.50881
19	0.00275259	765	61	17	0.278689	0.0222222	GO:0001775	GO:BP	cell activation	8376	567	3.05137
20	0.00275778	3670	61	43	0.704918	0.0117166	GO:0050896	GO:BP	response to stimulus	8376	15547	1.60883
21	0.00281398	216	61	9	0.147541	0.0416667	GO:0030855	GO:BP	epithelial cell differentiation	8376	8088	5.72131
22	0.00281434	542	61	14	0.229508	0.0258303	GO:0002520	GO:BP	immune system development	8376	1189	3.54679
23	0.00281434	121	61	7	0.114754	0.0578512	GO:0045637	GO:BP	regulation of myeloid cell differentiation	8376	13489	7.94364
24	0.00389844	1265	61	22	0.360656	0.0173913	GO:0071310	GO:BP	cellular response to organic substance	8376	19508	2.38803
25	0.00389844	975	61	19	0.311475	0.0194872	GO:0006915	GO:BP	apoptotic process	8376	2889	2.67581
26	0.00389844	5146	61	52	0.852459	0.0101049	GO:0065007	GO:BP	biological regulation	8376	18770	1.38752
27	0.00389844	491	61	13	0.213115	0.0264766	GO:0030097	GO:BP	hemopoiesis	8376	7760	3.63554
28	0.00389844	1162	61	21	0.344262	0.0180723	GO:0044419	GO:BP	interspecies interaction between organisms	8376	12890	2.48153
29	0.00422066	91	61	6	0.0983607	0.0659341	GO:0071222	GO:BP	cellular response to lipopolysaccharide	8376	19424	9.0535
30	0.00474209	94	61	6	0.0983607	0.0638298	GO:0071219	GO:BP	cellular response to molecule of bacterial origin	8376	19421	8.76456
31	0.00474209	1004	61	19	0.311475	0.0189243	GO:0012501	GO:BP	programmed cell death	8376	5159	2.59852
32	0.00479545	586	61	14	0.229508	0.0238908	GO:0006518	GO:BP	peptide metabolic process	8376	2526	3.28048
33	0.00497729	59	61	5	0.0819672	0.0847458	GO:1903707	GO:BP	negative regulation of hemopoiesis	8376	26781	11.6366
34	0.00554422	4892	61	50	0.819672	0.0102208	GO:0050789	GO:BP	regulation of biological process	8376	15458	1.40343
35	0.00554422	143	61	7	0.114754	0.048951	GO:0032496	GO:BP	response to lipopolysaccharide	8376	8867	6.72154
36	0.00583797	254	61	9	0.147541	0.0354331	GO:1903706	GO:BP	regulation of hemopoiesis	8376	26780	4.86537
37	0.00605374	33	61	4	0.0655738	0.121212	GO:0030593	GO:BP	neutrophil chemotaxis	8376	7978	16.6438
38	0.00605374	257	61	9	0.147541	0.0350195	GO:0045596	GO:BP	negative regulation of cell differentiation	8376	13448	4.80857
39	0.00627465	150	61	7	0.114754	0.0466667	GO:0002237	GO:BP	response to molecule of bacterial origin	8376	908	6.40787
40	0.00627465	1337	61	22	0.360656	0.0164547	GO:0048513	GO:BP	animal organ development	8376	14963	2.25943
41	0.00627465	1139	61	20	0.327869	0.0175593	GO:0009605	GO:BP	response to external stimulus	8376	4012	2.41109
42	0.00670667	1246	61	21	0.344262	0.0168539	GO:0007166	GO:BP	cell surface receptor signaling pathway	8376	3101	2.31424
43	0.00698395	3075	61	37	0.606557	0.0120325	GO:0051716	GO:BP	cellular response to stimulus	8376	16204	1.6522
44	0.00708235	2338	61	31	0.508197	0.0132592	GO:0007165	GO:BP	signal transduction	8376	3100	1.82064
45	0.00747546	551	61	13	0.213115	0.0235935	GO:1901701	GO:BP	cellular response to oxygen-containing compound	8376	24978	3.23965
46	0.00835639	721	61	15	0.245902	0.0208044	GO:0043603	GO:BP	cellular amide metabolic process	8376	12532	2.85669
47	0.00893174	346	61	10	0.163934	0.0289017	GO:0051093	GO:BP	negative regulation of developmental process	8376	15710	3.96854
48	0.00893174	164	61	7	0.114754	0.0426829	GO:0019083	GO:BP	viral transcription	8376	6495	5.86086
49	0.00893174	2493	61	32	0.52459	0.0128359	GO:0023052	GO:BP	signaling	8376	7708	1.76252
50	0.00893174	114	61	6	0.0983607	0.0526316	GO:0071216	GO:BP	cellular response to biotic stimulus	8376	19418	7.22692
51	0.00913519	16	61	3	0.0491803	0.1875	GO:0071622	GO:BP	regulation of granulocyte chemotaxis	8376	19780	25.7459
52	0.00913519	221	61	8	0.131148	0.0361991	GO:0030099	GO:BP	myeloid cell differentiation	8376	7762	4.97055
53	0.00913519	2512	61	32	0.52459	0.0127389	GO:0007154	GO:BP	cell communication	8376	3089	1.74919
54	0.00913519	40	61	4	0.0655738	0.1	GO:0071621	GO:BP	granulocyte chemotaxis	8376	19779	13.7311
55	0.00960111	661	61	14	0.229508	0.02118	GO:0051707	GO:BP	response to other organism	8376	16196	2.90826
56	0.00960111	661	61	14	0.229508	0.02118	GO:0043207	GO:BP	response to external biotic stimulus	8376	12295	2.90826
57	0.00960111	426	61	11	0.180328	0.0258216	GO:0060429	GO:BP	epithelium development	8376	17347	3.5456
58	0.00960111	1015	61	18	0.295082	0.017734	GO:0006955	GO:BP	immune response	8376	2922	2.43508
59	0.00990876	17	61	3	0.0491803	0.176471	GO:0010830	GO:BP	regulation of myotube differentiation	8376	5006	24.2314
60	0.00990876	17	61	3	0.0491803	0.176471	GO:0010518	GO:BP	positive regulation of phospholipase activity	8376	4725	24.2314
61	0.0108444	79	61	5	0.0819672	0.0632911	GO:1902107	GO:BP	positive regulation of leukocyte differentiation	8376	25369	8.6906
62	0.0113352	2556	61	32	0.52459	0.0125196	GO:0051234	GO:BP	establishment of localization	8376	15832	1.71908
63	0.0118673	681	61	14	0.229508	0.020558	GO:0009607	GO:BP	response to biotic stimulus	8376	4014	2.82285
64	0.0118673	766	61	15	0.245902	0.0195822	GO:1901700	GO:BP	response to oxygen-containing compound	8376	24977	2.68887
65	0.0119425	45	61	4	0.0655738	0.0888889	GO:1990266	GO:BP	neutrophil migration	8376	28957	12.2055
66	0.0120103	4	61	2	0.0327869	0.5	GO:0031584	GO:BP	activation of phospholipase D activity	8376	8450	68.6557
67	0.0120103	181	61	7	0.114754	0.038674	GO:0019080	GO:BP	viral gene expression	8376	6492	5.31039
68	0.0120103	128	61	6	0.0983607	0.046875	GO:0050673	GO:BP	epithelial cell proliferation	8376	15390	6.43648
69	0.0123476	775	61	15	0.245902	0.0193548	GO:0045595	GO:BP	regulation of cell differentiation	8376	13447	2.65764
70	0.0123758	376	61	10	0.163934	0.0265957	GO:0010942	GO:BP	positive regulation of cell death	8376	5105	3.6519
71	0.0123758	4634	61	47	0.770492	0.0101424	GO:0050794	GO:BP	regulation of cellular process	8376	15462	1.39267
72	0.0128198	694	61	14	0.229508	0.0201729	GO:0044403	GO:BP	symbiotic process	8376	12878	2.76997
73	0.0129072	245	61	8	0.131148	0.0326531	GO:0009617	GO:BP	response to bacterium	8376	4023	4.48364
74	0.0132861	86	61	5	0.0819672	0.0581395	GO:0071346	GO:BP	cellular response to interferon-gamma	8376	19542	7.98323
75	0.0137929	134	61	6	0.0983607	0.0447761	GO:1902105	GO:BP	regulation of leukocyte differentiation	8376	25367	6.14828
76	0.0138738	2857	61	34	0.557377	0.0119006	GO:0048518	GO:BP	positive regulation of biological process	8376	14968	1.63409
77	0.014979	2498	61	31	0.508197	0.0124099	GO:0006810	GO:BP	transport	8376	2800	1.70403
78	0.0149818	253	61	8	0.131148	0.0316206	GO:0006979	GO:BP	response to oxidative stress	8376	2942	4.34186
79	0.0158617	2631	61	32	0.52459	0.0121627	GO:0048522	GO:BP	positive regulation of cellular process	8376	14972	1.67007
80	0.0159143	22	61	3	0.0491803	0.136364	GO:1990869	GO:BP	cellular response to chemokine	8376	29211	18.7243
81	0.0159143	1818	61	25	0.409836	0.0137514	GO:0048731	GO:BP	system development	8376	15159	1.88822
82	0.0159143	22	61	3	0.0491803	0.136364	GO:1990868	GO:BP	response to chemokine	8376	29210	18.7243
83	0.0159143	22	61	3	0.0491803	0.136364	GO:0010517	GO:BP	regulation of phospholipase activity	8376	4724	18.7243
84	0.0162309	329	61	9	0.147541	0.0273556	GO:0055082	GO:BP	cellular chemical homeostasis	8376	16935	3.75624
85	0.0162309	1093	61	18	0.295082	0.0164684	GO:0050793	GO:BP	regulation of developmental process	8376	15461	2.26131
86	0.0162309	53	61	4	0.0655738	0.0754717	GO:0002761	GO:BP	regulation of myeloid leukocyte differentiation	8376	1424	10.3631
87	0.0162309	199	61	7	0.114754	0.0351759	GO:0062197	GO:BP	cellular response to chemical stress	8376	18741	4.83005
88	0.0162309	199	61	7	0.114754	0.0351759	GO:0007186	GO:BP	G protein-coupled receptor signaling pathway	8376	3119	4.83005
89	0.0162309	725	61	14	0.229508	0.0193103	GO:0046903	GO:BP	secretion	8376	14563	2.65153
90	0.0162309	93	61	5	0.0819672	0.0537634	GO:0006614	GO:BP	SRP-dependent cotranslational protein targeting to membrane	8376	2620	7.38234
91	0.0163777	479	61	11	0.180328	0.0229645	GO:0060548	GO:BP	negative regulation of cell death	8376	17465	3.15329
92	0.0163777	23	61	3	0.0491803	0.130435	GO:0060193	GO:BP	positive regulation of lipase activity	8376	17136	17.9102
93	0.0168721	54	61	4	0.0655738	0.0740741	GO:0097530	GO:BP	granulocyte migration	8376	22081	10.1712
94	0.0173718	146	61	6	0.0983607	0.0410959	GO:0071356	GO:BP	cellular response to tumor necrosis factor	8376	19552	5.64294
95	0.0180155	97	61	5	0.0819672	0.0515464	GO:0006613	GO:BP	cotranslational protein targeting to membrane	8376	2619	7.07791
96	0.0183609	98	61	5	0.0819672	0.0510204	GO:0034341	GO:BP	response to interferon-gamma	8376	9922	7.00569
97	0.0183609	494	61	11	0.180328	0.0222672	GO:0002684	GO:BP	positive regulation of immune system process	8376	1353	3.05754
98	0.0183609	56	61	4	0.0655738	0.0714286	GO:0002576	GO:BP	platelet degranulation	8376	1245	9.80796
99	0.0183609	6	61	2	0.0327869	0.333333	GO:0010837	GO:BP	regulation of keratinocyte proliferation	8376	5013	45.7705
100	0.0183609	6	61	2	0.0327869	0.333333	GO:0061377	GO:BP	mammary gland lobule development	8376	18262	45.7705
101	0.0183609	206	61	7	0.114754	0.0339806	GO:0002790	GO:BP	peptide secretion	8376	1453	4.66592
102	0.0183609	1124	61	18	0.295082	0.0160142	GO:0010628	GO:BP	positive regulation of gene expression	8376	4814	2.19894
103	0.0183609	99	61	5	0.0819672	0.0505051	GO:0002573	GO:BP	myeloid leukocyte differentiation	8376	1242	6.93492
104	0.0183609	6	61	2	0.0327869	0.333333	GO:0060749	GO:BP	mammary gland alveolus development	8376	17656	45.7705
105	0.0183609	99	61	5	0.0819672	0.0505051	GO:1903708	GO:BP	positive regulation of hemopoiesis	8376	26782	6.93492
106	0.0183609	6	61	2	0.0327869	0.333333	GO:0043616	GO:BP	keratinocyte proliferation	8376	12544	45.7705
107	0.0183609	1023	61	17	0.278689	0.0166178	GO:1901566	GO:BP	organonitrogen compound biosynthetic process	8376	24866	2.28181
108	0.0186912	152	61	6	0.0983607	0.0394737	GO:0006612	GO:BP	protein targeting to membrane	8376	2618	5.42019
109	0.0190202	346	61	9	0.147541	0.0260116	GO:0043065	GO:BP	positive regulation of apoptotic process	8376	12222	3.57169
110	0.0190202	276	61	8	0.131148	0.0289855	GO:0050865	GO:BP	regulation of cell activation	8376	15521	3.98004
111	0.019371	422	61	10	0.163934	0.0236967	GO:0019725	GO:BP	cellular homeostasis	8376	6990	3.25383
112	0.019371	26	61	3	0.0491803	0.115385	GO:0045600	GO:BP	positive regulation of fat cell differentiation	8376	13452	15.8436
113	0.0197894	155	61	6	0.0983607	0.0387097	GO:0034612	GO:BP	response to tumor necrosis factor	8376	10049	5.31528
114	0.0199196	350	61	9	0.147541	0.0257143	GO:0043068	GO:BP	positive regulation of programmed cell death	8376	12225	3.53087
115	0.020216	2231	61	28	0.459016	0.0125504	GO:0048856	GO:BP	anatomical structure development	8376	15276	1.72332
116	0.0205333	674	61	13	0.213115	0.0192878	GO:0016032	GO:BP	viral process	8376	5689	2.64844
117	0.0208935	1560	61	22	0.360656	0.0141026	GO:0030154	GO:BP	cell differentiation	8376	7776	1.93644
118	0.0208935	1892	61	25	0.409836	0.0132135	GO:0009893	GO:BP	positive regulation of metabolic process	8376	4254	1.81437
119	0.0213341	106	61	5	0.0819672	0.0471698	GO:0045047	GO:BP	protein targeting to ER	8376	13202	6.47696
120	0.0213341	1673	61	23	0.377049	0.0137478	GO:0031325	GO:BP	positive regulation of cellular metabolic process	8376	8322	1.88773
121	0.0218485	358	61	9	0.147541	0.0251397	GO:0008284	GO:BP	positive regulation of cell population proliferation	8376	3603	3.45196
122	0.0218485	62	61	4	0.0655738	0.0645161	GO:0050679	GO:BP	positive regulation of epithelial cell proliferation	8376	15396	8.8588
123	0.0219958	28	61	3	0.0491803	0.107143	GO:0002763	GO:BP	positive regulation of myeloid leukocyte differentiation	8376	1426	14.7119
124	0.0229005	1264	61	19	0.311475	0.0150316	GO:0051239	GO:BP	regulation of multicellular organismal process	8376	15837	2.06402
125	0.0229005	109	61	5	0.0819672	0.0458716	GO:0072599	GO:BP	establishment of protein localization to endoplasmic reticulum	8376	20550	6.29869
126	0.0229005	109	61	5	0.0819672	0.0458716	GO:0050678	GO:BP	regulation of epithelial cell proliferation	8376	15395	6.29869
127	0.0229005	687	61	13	0.213115	0.0189229	GO:0032940	GO:BP	secretion by cell	8376	9200	2.59832
128	0.0229005	224	61	7	0.114754	0.03125	GO:0061061	GO:BP	muscle structure development	8376	17956	4.29098
129	0.0232739	2031	61	26	0.42623	0.0128016	GO:0007275	GO:BP	multicellular organism development	8376	3201	1.7578
130	0.0234499	1585	61	22	0.360656	0.0138801	GO:0051173	GO:BP	positive regulation of nitrogen compound metabolic process	8376	15782	1.9059
131	0.0244838	696	61	13	0.213115	0.0186782	GO:0140352	GO:BP	export from cell	8376	23195	2.56473
132	0.0253846	66	61	4	0.0655738	0.0606061	GO:0030168	GO:BP	platelet activation	8376	7784	8.32191
133	0.025419	700	61	13	0.213115	0.0185714	GO:0006952	GO:BP	defense response	8376	2919	2.55007
134	0.0264856	3164	61	35	0.57377	0.0110619	GO:0060255	GO:BP	regulation of macromolecule metabolic process	8376	17183	1.51893
135	0.0264856	8	61	2	0.0327869	0.25	GO:0045663	GO:BP	positive regulation of myoblast differentiation	8376	13515	34.3279
136	0.0264856	8	61	2	0.0327869	0.25	GO:0035994	GO:BP	response to muscle stretch	8376	10880	34.3279
137	0.0264856	8	61	2	0.0327869	0.25	GO:0048741	GO:BP	skeletal muscle fiber development	8376	15169	34.3279
138	0.0264856	31	61	3	0.0491803	0.0967742	GO:0014902	GO:BP	myotube differentiation	8376	5371	13.2882
139	0.0267533	1609	61	22	0.360656	0.0136731	GO:0048869	GO:BP	cellular developmental process	8376	15288	1.87747
140	0.0267533	68	61	4	0.0655738	0.0588235	GO:0051147	GO:BP	regulation of muscle cell differentiation	8376	15756	8.07715
141	0.0269937	116	61	5	0.0819672	0.0431034	GO:0000184	GO:BP	nuclear-transcribed mRNA catabolic process, nonsense-mediated decay	8376	79	5.9186
142	0.0269937	172	61	6	0.0983607	0.0348837	GO:0034599	GO:BP	cellular response to oxidative stress	8376	10043	4.78994
143	0.0274221	236	61	7	0.114754	0.029661	GO:0051249	GO:BP	regulation of lymphocyte activation	8376	15844	4.0728
144	0.0274221	712	61	13	0.213115	0.0182584	GO:0045321	GO:BP	leukocyte activation	8376	13330	2.50709
145	0.0276712	32	61	3	0.0491803	0.09375	GO:0060191	GO:BP	regulation of lipase activity	8376	17134	12.873
146	0.028066	2550	61	30	0.491803	0.0117647	GO:0034645	GO:BP	cellular macromolecule biosynthetic process	8376	10073	1.61543
147	0.0284775	175	61	6	0.0983607	0.0342857	GO:0050900	GO:BP	leukocyte migration	8376	15550	4.70782
148	0.0292964	1002	61	16	0.262295	0.0159681	GO:0031328	GO:BP	positive regulation of cellular biosynthetic process	8376	8325	2.1926
149	0.0298971	120	61	5	0.0819672	0.0416667	GO:0007517	GO:BP	muscle organ development	8376	3416	5.72131
150	0.0300664	386	61	9	0.147541	0.0233161	GO:0033993	GO:BP	response to lipid	8376	9700	3.20156
151	0.0305863	9	61	2	0.0327869	0.222222	GO:0090023	GO:BP	positive regulation of neutrophil chemotaxis	8376	21253	30.5137
152	0.0305863	9	61	2	0.0327869	0.222222	GO:0071624	GO:BP	positive regulation of granulocyte chemotaxis	8376	19782	30.5137
153	0.0311158	34	61	3	0.0491803	0.0882353	GO:0002690	GO:BP	positive regulation of leukocyte chemotaxis	8376	1359	12.1157
154	0.0311158	122	61	5	0.0819672	0.0409836	GO:0000302	GO:BP	response to reactive oxygen species	8376	136	5.62752
155	0.0311707	180	61	6	0.0983607	0.0333333	GO:0006413	GO:BP	translational initiation	8376	2437	4.57705
156	0.0312322	73	61	4	0.0655738	0.0547945	GO:0001678	GO:BP	cellular glucose homeostasis	8376	508	7.52392
157	0.0315612	1754	61	23	0.377049	0.0131129	GO:0010604	GO:BP	positive regulation of macromolecule metabolic process	8376	4791	1.80055
158	0.0317538	1016	61	16	0.262295	0.015748	GO:0009891	GO:BP	positive regulation of biosynthetic process	8376	4252	2.16239
159	0.0321645	74	61	4	0.0655738	0.0540541	GO:0061448	GO:BP	connective tissue development	8376	18333	7.42224
160	0.0321645	3089	61	34	0.557377	0.0110068	GO:0051179	GO:BP	localization	8376	15788	1.51136
161	0.0323791	35	61	3	0.0491803	0.0857143	GO:0045638	GO:BP	negative regulation of myeloid cell differentiation	8376	13490	11.7696
162	0.0331415	830	61	14	0.229508	0.0168675	GO:2000026	GO:BP	regulation of multicellular organismal development	8376	29296	2.3161
163	0.0331415	184	61	6	0.0983607	0.0326087	GO:0050867	GO:BP	positive regulation of cell activation	8376	15523	4.47755
164	0.034636	10	61	2	0.0327869	0.2	GO:0090022	GO:BP	regulation of neutrophil chemotaxis	8376	21252	27.4623
165	0.034636	10	61	2	0.0327869	0.2	GO:0014904	GO:BP	myotube cell development	8376	5372	27.4623
166	0.034636	10	61	2	0.0327869	0.2	GO:0017014	GO:BP	protein nitrosylation	8376	5929	27.4623
167	0.034636	10	61	2	0.0327869	0.2	GO:0018119	GO:BP	peptidyl-cysteine S-nitrosylation	8376	6059	27.4623
168	0.0349591	325	61	8	0.131148	0.0246154	GO:0009887	GO:BP	animal organ morphogenesis	8376	4248	3.37997
169	0.0349591	654	61	12	0.196721	0.0183486	GO:0042127	GO:BP	regulation of cell population proliferation	8376	11636	2.51948
170	0.0353991	188	61	6	0.0983607	0.0319149	GO:0002683	GO:BP	negative regulation of immune system process	8376	1352	4.38228
171	0.0355138	2612	61	30	0.491803	0.0114855	GO:0009059	GO:BP	macromolecule biosynthetic process	8376	3697	1.57708
172	0.0355138	37	61	3	0.0491803	0.0810811	GO:0051153	GO:BP	regulation of striated muscle cell differentiation	8376	15762	11.1334
173	0.0355138	2611	61	30	0.491803	0.0114899	GO:0048519	GO:BP	negative regulation of biological process	8376	14969	1.57769
174	0.0355138	37	61	3	0.0491803	0.0810811	GO:0034109	GO:BP	homotypic cell-cell adhesion	8376	9746	11.1334
175	0.0355138	78	61	4	0.0655738	0.0512821	GO:0097529	GO:BP	myeloid leukocyte migration	8376	22080	7.04161
176	0.0360576	190	61	6	0.0983607	0.0315789	GO:0000956	GO:BP	nuclear-transcribed mRNA catabolic process	8376	338	4.33615
177	0.0365942	409	61	9	0.147541	0.0220049	GO:0045597	GO:BP	positive regulation of cell differentiation	8376	13449	3.02152
178	0.0365942	131	61	5	0.0819672	0.0381679	GO:0070972	GO:BP	protein localization to endoplasmic reticulum	8376	19336	5.2409
179	0.0365942	259	61	7	0.114754	0.027027	GO:1901652	GO:BP	response to peptide	8376	24939	3.71112
180	0.0365942	79	61	4	0.0655738	0.0506329	GO:0030595	GO:BP	leukocyte chemotaxis	8376	7979	6.95248
181	0.0365942	754	61	13	0.213115	0.0172414	GO:0045893	GO:BP	positive regulation of transcription, DNA-templated	8376	13725	2.36744
182	0.0365942	849	61	14	0.229508	0.01649	GO:0042592	GO:BP	homeostatic process	8376	11925	2.26426
183	0.0365942	259	61	7	0.114754	0.027027	GO:0071396	GO:BP	cellular response to lipid	8376	19592	3.71112
184	0.0379276	261	61	7	0.114754	0.0268199	GO:0009611	GO:BP	response to wounding	8376	4018	3.68268
185	0.037938	39	61	3	0.0491803	0.0769231	GO:0022612	GO:BP	gland morphogenesis	8376	7660	10.5624
186	0.037938	39	61	3	0.0491803	0.0769231	GO:1902106	GO:BP	negative regulation of leukocyte differentiation	8376	25368	10.5624
187	0.037938	81	61	4	0.0655738	0.0493827	GO:0050864	GO:BP	regulation of B cell activation	8376	15520	6.78081
188	0.037938	39	61	3	0.0491803	0.0769231	GO:0003231	GO:BP	cardiac ventricle development	8376	1830	10.5624
189	0.0390456	264	61	7	0.114754	0.0265152	GO:0002694	GO:BP	regulation of leukocyte activation	8376	1363	3.64083
190	0.0390456	82	61	4	0.0655738	0.0487805	GO:0002685	GO:BP	regulation of leukocyte migration	8376	1354	6.69812
191	0.0390456	1055	61	16	0.262295	0.0151659	GO:0048584	GO:BP	positive regulation of response to stimulus	8376	15024	2.08245
192	0.0394365	3415	61	36	0.590164	0.0105417	GO:0019222	GO:BP	regulation of metabolic process	8376	6529	1.4475
193	0.0405119	501	61	10	0.163934	0.0199601	GO:0006887	GO:BP	exocytosis	8376	2864	2.74075
194	0.0409782	866	61	14	0.229508	0.0161663	GO:0051254	GO:BP	positive regulation of RNA metabolic process	8376	15849	2.21982
195	0.0409782	963	61	15	0.245902	0.0155763	GO:0010557	GO:BP	positive regulation of macromolecule biosynthetic process	8376	4749	2.13881
196	0.0409782	420	61	9	0.147541	0.0214286	GO:0043066	GO:BP	negative regulation of apoptotic process	8376	12223	2.94239
197	0.0415741	41	61	3	0.0491803	0.0731707	GO:0048661	GO:BP	positive regulation of smooth muscle cell proliferation	8376	15090	10.0472
198	0.0415741	41	61	3	0.0491803	0.0731707	GO:0021782	GO:BP	glial cell development	8376	7375	10.0472
199	0.0419471	12	61	2	0.0327869	0.166667	GO:0060412	GO:BP	ventricular septum morphogenesis	8376	17333	22.8852
200	0.0419471	270	61	7	0.114754	0.0259259	GO:0002521	GO:BP	leukocyte differentiation	8376	1190	3.55993
201	0.0419471	12	61	2	0.0327869	0.166667	GO:1902624	GO:BP	positive regulation of neutrophil migration	8376	25808	22.8852
202	0.0434447	42	61	3	0.0491803	0.0714286	GO:0002688	GO:BP	regulation of leukocyte chemotaxis	8376	1357	9.80796
203	0.0434447	42	61	3	0.0491803	0.0714286	GO:0007188	GO:BP	adenylate cyclase-modulating G protein-coupled receptor signaling pathway	8376	3121	9.80796
204	0.0453222	2550	61	29	0.47541	0.0113725	GO:0044271	GO:BP	cellular nitrogen compound biosynthetic process	8376	12811	1.56158
205	0.0456864	430	61	9	0.147541	0.0209302	GO:0043069	GO:BP	negative regulation of programmed cell death	8376	12226	2.87396
206	0.0460283	206	61	6	0.0983607	0.0291262	GO:0042330	GO:BP	taxis	8376	11759	3.99936
207	0.0462785	1728	61	22	0.360656	0.0127315	GO:0065008	GO:BP	regulation of biological quality	8376	18771	1.74818
208	0.0462785	88	61	4	0.0655738	0.0454545	GO:0043491	GO:BP	protein kinase B signaling	8376	12466	6.24143
209	0.0470761	13	61	2	0.0327869	0.153846	GO:0032495	GO:BP	response to muramyl dipeptide	8376	8866	21.1248
210	0.0470761	13	61	2	0.0327869	0.153846	GO:0048747	GO:BP	muscle fiber development	8376	15175	21.1248
211	0.0475004	89	61	4	0.0655738	0.0449438	GO:0045619	GO:BP	regulation of lymphocyte differentiation	8376	13471	6.1713
212	0.0475004	44	61	3	0.0491803	0.0681818	GO:0007187	GO:BP	G protein-coupled receptor signaling pathway, coupled to cyclic nucleotide second messenger	8376	3120	9.36215
213	0.0477901	209	61	6	0.0983607	0.0287081	GO:0002250	GO:BP	adaptive immune response	8376	920	3.94196
214	0.0487594	90	61	4	0.0655738	0.0444444	GO:0034614	GO:BP	cellular response to reactive oxygen species	8376	10051	6.10273
215	0.0499253	45	61	3	0.0491803	0.0666667	GO:0045582	GO:BP	positive regulation of T cell differentiation	8376	13434	9.1541

## Sheet: cDCs
	p_value	term_size	query_size	intersection_size	precision	recall	term_id	source	term_name	effective_domain_size	source_order	foldenrichment
1	7.28993e-12	1414	177	65	0.367232	0.0459689	GO:0044419	GO:BP	interspecies interaction between organisms	10637	12890	2.76255
2	9.00439e-12	4623	177	128	0.723164	0.0276876	GO:0050896	GO:BP	response to stimulus	10637	15547	1.66392
3	2.49872e-10	94	177	17	0.0960452	0.180851	GO:0006614	GO:BP	SRP-dependent cotranslational protein targeting to membrane	10637	2620	10.8684
4	3.84147e-10	98	177	17	0.0960452	0.173469	GO:0006613	GO:BP	cotranslational protein targeting to membrane	10637	2619	10.4248
5	6.77646e-10	3169	177	98	0.553672	0.0309246	GO:0048519	GO:BP	negative regulation of biological process	10637	14969	1.85845
6	8.76921e-10	715	177	41	0.231638	0.0573427	GO:0071345	GO:BP	cellular response to cytokine stimulus	10637	19541	3.44607
7	1.06913e-09	968	177	48	0.271186	0.0495868	GO:0001775	GO:BP	cell activation	10637	567	2.97997
8	1.06913e-09	108	177	17	0.0960452	0.157407	GO:0045047	GO:BP	protein targeting to ER	10637	13202	9.45956
9	1.23765e-09	1567	177	63	0.355932	0.0402042	GO:0071310	GO:BP	cellular response to organic substance	10637	19508	2.41611
10	1.23765e-09	111	177	17	0.0960452	0.153153	GO:0072599	GO:BP	establishment of protein localization to endoplasmic reticulum	10637	20550	9.2039
11	1.23765e-09	1917	177	71	0.40113	0.037037	GO:0010033	GO:BP	response to organic substance	10637	4348	2.22578
12	1.60905e-09	778	177	42	0.237288	0.0539846	GO:0034097	GO:BP	response to cytokine	10637	9737	3.24426
13	1.90533e-09	133	177	18	0.101695	0.135338	GO:0070972	GO:BP	protein localization to endoplasmic reticulum	10637	19336	8.1333
14	2.04006e-09	1308	177	56	0.316384	0.0428135	GO:0006955	GO:BP	immune response	10637	2922	2.57292
15	2.22517e-09	1476	177	60	0.338983	0.0406504	GO:0009605	GO:BP	response to external stimulus	10637	4012	2.44293
16	4.23227e-09	879	177	44	0.248588	0.0500569	GO:0009607	GO:BP	response to biotic stimulus	10637	4014	3.00822
17	6.4507e-09	894	177	44	0.248588	0.049217	GO:0045321	GO:BP	leukocyte activation	10637	13330	2.95775
18	6.4507e-09	859	177	43	0.242938	0.0500582	GO:0051707	GO:BP	response to other organism	10637	16196	3.0083
19	6.4507e-09	859	177	43	0.242938	0.0500582	GO:0043207	GO:BP	response to external biotic stimulus	10637	12295	3.0083
20	7.3532e-09	1877	177	68	0.384181	0.036228	GO:0002376	GO:BP	immune system process	10637	1046	2.17716
21	9.2282e-09	170	177	19	0.107345	0.111765	GO:0019083	GO:BP	viral transcription	10637	6495	6.71662
22	1.65981e-08	2431	177	79	0.446328	0.0324969	GO:0006950	GO:BP	response to stress	10637	2918	1.95294
23	1.71681e-08	2338	177	77	0.435028	0.0329341	GO:0042221	GO:BP	response to chemical	10637	11708	1.97921
24	2.16622e-08	935	177	44	0.248588	0.0470588	GO:0042981	GO:BP	regulation of apoptotic process	10637	12160	2.82805
25	2.23848e-08	121	177	16	0.0903955	0.132231	GO:0000184	GO:BP	nuclear-transcribed mRNA catabolic process, nonsense-mediated decay	10637	79	7.94658
26	2.85277e-08	1021	177	46	0.259887	0.0450539	GO:0010941	GO:BP	regulation of cell death	10637	5104	2.70756
27	2.85277e-08	2970	177	89	0.502825	0.0299663	GO:0007165	GO:BP	signal transduction	10637	3100	1.80086
28	2.94857e-08	949	177	44	0.248588	0.0463646	GO:0043067	GO:BP	regulation of programmed cell death	10637	12224	2.78633
29	2.94857e-08	3185	177	93	0.525424	0.0291994	GO:0007154	GO:BP	cell communication	10637	3089	1.75477
30	3.41529e-08	187	177	19	0.107345	0.101604	GO:0019080	GO:BP	viral gene expression	10637	6492	6.10602
31	4.20133e-08	168	177	18	0.101695	0.107143	GO:0006612	GO:BP	protein targeting to membrane	10637	2618	6.43886
32	4.39666e-08	1197	177	50	0.282486	0.0417711	GO:0006915	GO:BP	apoptotic process	10637	2889	2.51028
33	5.01412e-08	3767	177	103	0.581921	0.0273427	GO:0051179	GO:BP	localization	10637	15788	1.64319
34	5.86786e-08	6078	177	140	0.79096	0.0230339	GO:0050789	GO:BP	regulation of biological process	10637	15458	1.38425
35	6.11635e-08	319	177	24	0.135593	0.0752351	GO:0042110	GO:BP	T cell activation	10637	11625	4.52133
36	7.72121e-08	1865	177	65	0.367232	0.0348525	GO:0070887	GO:BP	cellular response to chemical stimulus	10637	19275	2.0945
37	7.96917e-08	135	177	16	0.0903955	0.118519	GO:0034341	GO:BP	response to interferon-gamma	10637	9922	7.12249
38	9.79528e-08	1611	177	59	0.333333	0.0366232	GO:0007166	GO:BP	cell surface receptor signaling pathway	10637	3101	2.20091
39	9.79528e-08	2017	177	68	0.384181	0.0337134	GO:0009892	GO:BP	negative regulation of metabolic process	10637	4253	2.02604
40	9.94167e-08	1233	177	50	0.282486	0.0405515	GO:0012501	GO:BP	programmed cell death	10637	5159	2.43698
41	9.96289e-08	3165	177	91	0.514124	0.028752	GO:0023052	GO:BP	signaling	10637	7708	1.72788
42	9.96289e-08	203	177	19	0.107345	0.0935961	GO:0000956	GO:BP	nuclear-transcribed mRNA catabolic process	10637	338	5.62475
43	9.98952e-08	119	177	15	0.0847458	0.12605	GO:0071346	GO:BP	cellular response to interferon-gamma	10637	19542	7.57513
44	1.8719e-07	3863	177	103	0.581921	0.0266632	GO:0051716	GO:BP	cellular response to stimulus	10637	16204	1.60235
45	2.23677e-07	1308	177	51	0.288136	0.0389908	GO:0008219	GO:BP	cell death	10637	3595	2.34319
46	2.2868e-07	660	177	34	0.19209	0.0515152	GO:0098542	GO:BP	defense response to other organism	10637	22200	3.09586
47	2.2868e-07	766	177	37	0.20904	0.0483029	GO:0016032	GO:BP	viral process	10637	5689	2.90281
48	4.4116e-07	78	177	12	0.0677966	0.153846	GO:0002504	GO:BP	antigen processing and presentation of peptide or polysaccharide antigen via MHC class II	10637	1174	9.24555
49	4.95017e-07	1871	177	63	0.355932	0.0336718	GO:0010605	GO:BP	negative regulation of macromolecule metabolic process	10637	4792	2.02354
50	4.98652e-07	6389	177	142	0.80226	0.0222257	GO:0065007	GO:BP	biological regulation	10637	18770	1.33568
51	4.98652e-07	940	177	41	0.231638	0.043617	GO:0006952	GO:BP	defense response	10637	2919	2.62121
52	5.29606e-07	793	177	37	0.20904	0.0466583	GO:0044403	GO:BP	symbiotic process	10637	12878	2.80398
53	5.69565e-07	870	177	39	0.220339	0.0448276	GO:0002252	GO:BP	immune effector process	10637	922	2.69396
54	6.82804e-07	459	177	27	0.152542	0.0588235	GO:0034655	GO:BP	nucleobase-containing compound catabolic process	10637	10079	3.53506
55	7.20404e-07	955	177	41	0.231638	0.0429319	GO:0002682	GO:BP	regulation of immune system process	10637	1351	2.58004
56	8.53362e-07	186	177	17	0.0960452	0.0913978	GO:1902105	GO:BP	regulation of leukocyte differentiation	10637	25367	5.49265
57	9.09023e-07	187	177	17	0.0960452	0.0909091	GO:0006413	GO:BP	translational initiation	10637	2437	5.46328
58	1.15764e-06	3010	177	85	0.480226	0.0282392	GO:0006810	GO:BP	transport	10637	2800	1.69706
59	1.47898e-06	71	177	11	0.0621469	0.15493	GO:0060333	GO:BP	interferon-gamma-mediated signaling pathway	10637	17259	9.31065
60	1.6522e-06	481	177	27	0.152542	0.0561331	GO:0046700	GO:BP	heterocycle catabolic process	10637	14427	3.37337
61	1.69734e-06	482	177	27	0.152542	0.0560166	GO:0044270	GO:BP	cellular nitrogen compound catabolic process	10637	12810	3.36638
62	1.77368e-06	330	177	22	0.124294	0.0666667	GO:0009617	GO:BP	response to bacterium	10637	4023	4.0064
63	2.12785e-06	488	177	27	0.152542	0.0553279	GO:0019439	GO:BP	aromatic compound catabolic process	10637	6730	3.32499
64	2.13153e-06	74	177	11	0.0621469	0.148649	GO:0019886	GO:BP	antigen processing and presentation of exogenous peptide antigen via MHC class II	10637	7054	8.9332
65	2.46576e-06	1003	177	41	0.231638	0.0408774	GO:0008283	GO:BP	cell population proliferation	10637	3602	2.45657
66	2.75169e-06	76	177	11	0.0621469	0.144737	GO:0002495	GO:BP	antigen processing and presentation of peptide antigen via MHC class II	10637	1165	8.69811
67	2.97706e-06	157	177	15	0.0847458	0.0955414	GO:0019884	GO:BP	antigen processing and presentation of exogenous antigen	10637	7052	5.74166
68	3.0274e-06	600	177	30	0.169492	0.05	GO:0050776	GO:BP	regulation of immune response	10637	15450	3.0048
69	3.0274e-06	3079	177	85	0.480226	0.0276064	GO:0051234	GO:BP	establishment of localization	10637	15832	1.65903
70	3.0408e-06	499	177	27	0.152542	0.0541082	GO:1901361	GO:BP	organic cyclic compound catabolic process	10637	24677	3.25169
71	3.31227e-06	2369	177	71	0.40113	0.0299705	GO:0051641	GO:BP	cellular localization	10637	16140	1.80111
72	4.03619e-06	2786	177	79	0.446328	0.0283561	GO:0048523	GO:BP	negative regulation of cellular process	10637	14973	1.70409
73	4.03619e-06	507	177	27	0.152542	0.0532544	GO:0019221	GO:BP	cytokine-mediated signaling pathway	10637	6528	3.20038
74	4.03619e-06	349	177	22	0.124294	0.0630372	GO:0002694	GO:BP	regulation of leukocyte activation	10637	1363	3.78829
75	4.15495e-06	542	177	28	0.158192	0.0516605	GO:0045087	GO:BP	innate immune response	10637	13230	3.10459
76	5.68713e-06	842	177	36	0.20339	0.0427553	GO:0042127	GO:BP	regulation of cell population proliferation	10637	11636	2.56943
77	6.18795e-06	623	177	30	0.169492	0.0481541	GO:0007155	GO:BP	cell adhesion	10637	3090	2.89387
78	6.54733e-06	625	177	30	0.169492	0.048	GO:0022610	GO:BP	biological adhesion	10637	7658	2.88461
79	6.54733e-06	193	177	16	0.0903955	0.0829016	GO:0019882	GO:BP	antigen processing and presentation	10637	7050	4.98206
80	6.69817e-06	591	177	29	0.163842	0.0490694	GO:0051241	GO:BP	negative regulation of multicellular organismal process	10637	15839	2.94888
81	8.22138e-06	335	177	21	0.118644	0.0626866	GO:0006402	GO:BP	mRNA catabolic process	10637	2427	3.76721
82	8.29253e-06	3370	177	89	0.502825	0.0264095	GO:0032501	GO:BP	multicellular organismal process	10637	8871	1.58711
83	8.4399e-06	149	177	14	0.079096	0.0939597	GO:0002478	GO:BP	antigen processing and presentation of exogenous peptide antigen	10637	1148	5.64661
84	8.90083e-06	368	177	22	0.124294	0.0597826	GO:0050865	GO:BP	regulation of cell activation	10637	15521	3.5927
85	8.90083e-06	368	177	22	0.124294	0.0597826	GO:0006401	GO:BP	RNA catabolic process	10637	2426	3.5927
86	1.04523e-05	227	177	17	0.0960452	0.0748899	GO:0007159	GO:BP	leukocyte cell-cell adhesion	10637	3094	4.50058
87	1.11456e-05	202	177	16	0.0903955	0.0792079	GO:1903037	GO:BP	regulation of leukocyte cell-cell adhesion	10637	26173	4.76008
88	1.13213e-05	2810	177	78	0.440678	0.027758	GO:0048856	GO:BP	anatomical structure development	10637	15276	1.66815
89	1.33734e-05	475	177	25	0.141243	0.0526316	GO:0046649	GO:BP	lymphocyte activation	10637	14387	3.16295
90	1.35316e-05	410	177	23	0.129944	0.0560976	GO:0042119	GO:BP	neutrophil activation	10637	11630	3.37124
91	1.42698e-05	444	177	24	0.135593	0.0540541	GO:0051093	GO:BP	negative regulation of developmental process	10637	15710	3.24843
92	1.50307e-05	513	177	26	0.146893	0.0506823	GO:0002274	GO:BP	myeloid leukocyte activation	10637	944	3.0458
93	1.50307e-05	413	177	23	0.129944	0.0556901	GO:0036230	GO:BP	granulocyte activation	10637	11022	3.34675
94	1.65905e-05	159	177	14	0.079096	0.0880503	GO:0048002	GO:BP	antigen processing and presentation of peptide antigen	10637	14605	5.29148
95	1.65905e-05	384	177	22	0.124294	0.0572917	GO:0098609	GO:BP	cell-cell adhesion	10637	22211	3.443
96	1.75594e-05	518	177	26	0.146893	0.0501931	GO:0043066	GO:BP	negative regulation of apoptotic process	10637	12223	3.0164
97	1.76512e-05	1945	177	60	0.338983	0.0308483	GO:0051649	GO:BP	establishment of localization in cell	10637	16148	1.85386
98	1.91615e-05	296	177	19	0.107345	0.0641892	GO:0051249	GO:BP	regulation of lymphocyte activation	10637	15844	3.85752
99	1.94102e-05	357	177	21	0.118644	0.0588235	GO:0006605	GO:BP	protein targeting	10637	2611	3.53506
100	2.09631e-05	5772	177	128	0.723164	0.022176	GO:0050794	GO:BP	regulation of cellular process	10637	15462	1.33269
101	2.19689e-05	1318	177	46	0.259887	0.0349014	GO:0048584	GO:BP	positive regulation of response to stimulus	10637	15024	2.09743
102	2.26248e-05	271	177	18	0.101695	0.0664207	GO:0090150	GO:BP	establishment of protein localization to membrane	10637	21370	3.99162
103	2.26248e-05	862	177	35	0.19774	0.0406032	GO:0040011	GO:BP	locomotion	10637	11538	2.44009
104	2.31692e-05	528	177	26	0.146893	0.0492424	GO:0043069	GO:BP	negative regulation of programmed cell death	10637	12226	2.95927
105	2.31692e-05	216	177	16	0.0903955	0.0740741	GO:0050863	GO:BP	regulation of T cell activation	10637	15519	4.45156
106	3.12667e-05	875	177	35	0.19774	0.04	GO:0009719	GO:BP	response to endogenous stimulus	10637	4102	2.40384
107	3.29377e-05	250	177	17	0.0960452	0.068	GO:0022407	GO:BP	regulation of cell-cell adhesion	10637	7638	4.08653
108	4.16663e-05	2546	177	71	0.40113	0.0278869	GO:0007275	GO:BP	multicellular organism development	10637	3201	1.67589
109	4.18304e-05	1396	177	47	0.265537	0.0336676	GO:0010629	GO:BP	negative regulation of gene expression	10637	4815	2.02329
110	5.50471e-05	3524	177	89	0.502825	0.0252554	GO:0048518	GO:BP	positive regulation of biological process	10637	14968	1.51775
111	6.20455e-05	3098	177	81	0.457627	0.0261459	GO:0032502	GO:BP	developmental process	10637	8872	1.57127
112	6.31171e-05	595	177	27	0.152542	0.0453782	GO:0002443	GO:BP	leukocyte mediated immunity	10637	1113	2.72705
113	8.54501e-05	330	177	19	0.107345	0.0575758	GO:1903706	GO:BP	regulation of hemopoiesis	10637	26780	3.46008
114	9.55223e-05	646	177	28	0.158192	0.0433437	GO:0002684	GO:BP	positive regulation of immune system process	10637	1353	2.60478
115	0.000100635	399	177	21	0.118644	0.0526316	GO:0043312	GO:BP	neutrophil degranulation	10637	12341	3.16295
116	0.000112093	436	177	22	0.124294	0.0504587	GO:0043299	GO:BP	leukocyte degranulation	10637	12328	3.03237
117	0.000112093	402	177	21	0.118644	0.0522388	GO:0002283	GO:BP	neutrophil activation involved in immune response	10637	953	3.13935
118	0.000112093	578	177	26	0.146893	0.0449827	GO:0060548	GO:BP	negative regulation of cell death	10637	17465	2.70328
119	0.000120258	544	177	25	0.141243	0.0459559	GO:0045055	GO:BP	regulated exocytosis	10637	13210	2.76177
120	0.000122445	439	177	22	0.124294	0.0501139	GO:0072657	GO:BP	protein localization to membrane	10637	20566	3.01165
121	0.000129639	407	177	21	0.118644	0.0515971	GO:0002446	GO:BP	neutrophil mediated immunity	10637	1116	3.10078
122	0.000129639	547	177	25	0.141243	0.0457038	GO:0002366	GO:BP	leukocyte activation involved in immune response	10637	1036	2.74662
123	0.000135518	280	177	17	0.0960452	0.0607143	GO:0002250	GO:BP	adaptive immune response	10637	920	3.64869
124	0.00014018	550	177	25	0.141243	0.0454545	GO:0002263	GO:BP	cell activation involved in immune response	10637	933	2.73164
125	0.000142486	76	177	9	0.0508475	0.118421	GO:0002761	GO:BP	regulation of myeloid leukocyte differentiation	10637	1424	7.11664
126	0.000150936	1423	177	46	0.259887	0.0323261	GO:0070727	GO:BP	cellular macromolecule localization	10637	19186	1.94267
127	0.000158251	2289	177	64	0.361582	0.0279598	GO:0048731	GO:BP	system development	10637	15159	1.68027
128	0.000164009	786	177	31	0.175141	0.0394402	GO:0051674	GO:BP	localization of cell	10637	16170	2.3702
129	0.000164009	786	177	31	0.175141	0.0394402	GO:0048870	GO:BP	cell motility	10637	15289	2.3702
130	0.000168517	450	177	22	0.124294	0.0488889	GO:0002444	GO:BP	myeloid leukocyte mediated immunity	10637	1114	2.93803
131	0.000175217	122	177	11	0.0621469	0.0901639	GO:2001242	GO:BP	regulation of intrinsic apoptotic signaling pathway	10637	30455	5.4185
132	0.000195508	353	177	19	0.107345	0.0538244	GO:0002521	GO:BP	leukocyte differentiation	10637	1190	3.23463
133	0.000196162	174	177	13	0.0734463	0.0747126	GO:0030217	GO:BP	T cell differentiation	10637	7816	4.48993
134	0.000200319	1961	177	57	0.322034	0.0290668	GO:0030154	GO:BP	cell differentiation	10637	7776	1.7468
135	0.000219143	2016	177	58	0.327684	0.0287698	GO:0048869	GO:BP	cellular developmental process	10637	15288	1.72895
136	0.000232198	2942	177	76	0.429379	0.0258328	GO:0010468	GO:BP	regulation of gene expression	10637	4690	1.55245
137	0.000238023	3823	177	92	0.519774	0.0240649	GO:0060255	GO:BP	regulation of macromolecule metabolic process	10637	17183	1.4462
138	0.000242806	571	177	25	0.141243	0.0437828	GO:0006412	GO:BP	translation	10637	2436	2.63118
139	0.000244052	30	177	6	0.0338983	0.2	GO:0032653	GO:BP	regulation of interleukin-10 production	10637	8966	12.0192
140	0.000260818	128	177	11	0.0621469	0.0859375	GO:0042098	GO:BP	T cell proliferation	10637	11617	5.1645
141	0.000280432	46	177	7	0.039548	0.152174	GO:0033077	GO:BP	T cell differentiation in thymus	10637	9300	9.14505
142	0.000280432	181	177	13	0.0734463	0.0718232	GO:0032943	GO:BP	mononuclear cell proliferation	10637	9202	4.31629
143	0.000280432	181	177	13	0.0734463	0.0718232	GO:0046651	GO:BP	lymphocyte proliferation	10637	14388	4.31629
144	0.000282967	468	177	22	0.124294	0.0470085	GO:0072594	GO:BP	establishment of protein localization to organelle	10637	20545	2.82503
145	0.000282967	2136	177	60	0.338983	0.0280899	GO:0065008	GO:BP	regulation of biological quality	10637	18771	1.68809
146	0.000290135	505	177	23	0.129944	0.0455446	GO:0033993	GO:BP	response to lipid	10637	9700	2.73705
147	0.000299725	981	177	35	0.19774	0.0356779	GO:0006928	GO:BP	movement of cell or subcellular component	10637	2900	2.1441
148	0.000321963	583	177	25	0.141243	0.0428816	GO:0043043	GO:BP	peptide biosynthetic process	10637	12201	2.57702
149	0.000321963	583	177	25	0.141243	0.0428816	GO:1902533	GO:BP	positive regulation of intracellular signal transduction	10637	25736	2.57702
150	0.000334572	32	177	6	0.0338983	0.1875	GO:0032613	GO:BP	interleukin-10 production	10637	8926	11.268
151	0.000334572	439	177	21	0.118644	0.047836	GO:0002275	GO:BP	myeloid cell activation involved in immune response	10637	945	2.87475
152	0.000334572	623	177	26	0.146893	0.0417335	GO:0006887	GO:BP	exocytosis	10637	2864	2.50802
153	0.00033583	4147	177	97	0.548023	0.0233904	GO:0019222	GO:BP	regulation of metabolic process	10637	6529	1.40567
154	0.00034364	947	177	34	0.19209	0.0359029	GO:0046903	GO:BP	secretion	10637	14563	2.15762
155	0.000343944	1387	177	44	0.248588	0.0317231	GO:0010628	GO:BP	positive regulation of gene expression	10637	4814	1.90644
156	0.000351405	87	177	9	0.0508475	0.103448	GO:1903707	GO:BP	negative regulation of hemopoiesis	10637	26781	6.21683
157	0.000351716	339	177	18	0.101695	0.0530973	GO:0071396	GO:BP	cellular response to lipid	10637	19592	3.19094
158	0.000369793	216	177	14	0.079096	0.0648148	GO:0042493	GO:BP	response to drug	10637	11889	3.89511
159	0.000369793	216	177	14	0.079096	0.0648148	GO:0097193	GO:BP	intrinsic apoptotic signaling pathway	10637	21907	3.89511
160	0.000371724	2312	177	63	0.355932	0.0272491	GO:0009893	GO:BP	positive regulation of metabolic process	10637	4254	1.63757
161	0.000378964	1627	177	49	0.276836	0.0301168	GO:0035556	GO:BP	intracellular signal transduction	10637	10537	1.8099
162	0.000398979	956	177	34	0.19209	0.0355649	GO:1901700	GO:BP	response to oxygen-containing compound	10637	24977	2.13731
163	0.00040405	519	177	23	0.129944	0.044316	GO:0009725	GO:BP	response to hormone	10637	4108	2.66322
164	0.000420487	137	177	11	0.0621469	0.080292	GO:0032944	GO:BP	regulation of mononuclear cell proliferation	10637	9203	4.82523
165	0.000420487	137	177	11	0.0621469	0.080292	GO:0050670	GO:BP	regulation of lymphocyte proliferation	10637	15387	4.82523
166	0.000420487	2374	177	64	0.361582	0.0269587	GO:0048583	GO:BP	regulation of response to stimulus	10637	15023	1.62011
167	0.000426631	69	177	8	0.0451977	0.115942	GO:0050868	GO:BP	negative regulation of T cell activation	10637	15524	6.96766
168	0.000426631	449	177	21	0.118644	0.0467706	GO:0050778	GO:BP	positive regulation of immune response	10637	15452	2.81073
169	0.000426631	69	177	8	0.0451977	0.115942	GO:0030856	GO:BP	regulation of epithelial cell differentiation	10637	8089	6.96766
170	0.00042733	4	177	3	0.0169492	0.75	GO:0002503	GO:BP	peptide antigen assembly with MHC class II protein complex	10637	1173	45.072
171	0.00042733	4	177	3	0.0169492	0.75	GO:0002399	GO:BP	MHC class II protein complex assembly	10637	1069	45.072
172	0.000439545	192	177	13	0.0734463	0.0677083	GO:0070661	GO:BP	leukocyte proliferation	10637	19152	4.069
173	0.000457921	639	177	26	0.146893	0.0406886	GO:0010243	GO:BP	response to organonitrogen compound	10637	4537	2.44522
174	0.00050544	3238	177	80	0.451977	0.0247066	GO:0048522	GO:BP	positive regulation of cellular process	10637	14972	1.48477
175	0.00050544	1415	177	44	0.248588	0.0310954	GO:0034613	GO:BP	cellular protein localization	10637	10050	1.86871
176	0.000514739	52	177	7	0.039548	0.134615	GO:0030593	GO:BP	neutrophil chemotaxis	10637	7978	8.08985
177	0.000514739	887	177	32	0.180791	0.0360767	GO:0032940	GO:BP	secretion by cell	10637	9200	2.16806
178	0.000544042	1799	177	52	0.293785	0.0289049	GO:0071702	GO:BP	organic substance transport	10637	19848	1.73707
179	0.000545063	2146	177	59	0.333333	0.027493	GO:0010604	GO:BP	positive regulation of macromolecule metabolic process	10637	4791	1.65222
180	0.000545063	321	177	17	0.0960452	0.0529595	GO:0002253	GO:BP	activation of immune response	10637	923	3.18266
181	0.000545063	117	177	10	0.0564972	0.0854701	GO:0002262	GO:BP	myeloid cell homeostasis	10637	932	5.13641
182	0.000545063	321	177	17	0.0960452	0.0529595	GO:0009611	GO:BP	response to wounding	10637	4018	3.18266
183	0.000545063	727	177	28	0.158192	0.0385144	GO:0016477	GO:BP	cell migration	10637	5867	2.31457
184	0.000545063	117	177	10	0.0564972	0.0854701	GO:0045619	GO:BP	regulation of lymphocyte differentiation	10637	13471	5.13641
185	0.000605727	95	177	9	0.0508475	0.0947368	GO:0006959	GO:BP	humoral immune response	10637	2926	5.69331
186	0.000639273	145	177	11	0.0621469	0.0758621	GO:0070663	GO:BP	regulation of leukocyte proliferation	10637	19154	4.55901
187	0.000647559	74	177	8	0.0451977	0.108108	GO:1903038	GO:BP	negative regulation of leukocyte cell-cell adhesion	10637	26174	6.49687
188	0.000668246	262	177	15	0.0847458	0.0572519	GO:0002683	GO:BP	negative regulation of immune system process	10637	1352	3.44061
189	0.00071442	905	177	32	0.180791	0.0353591	GO:0140352	GO:BP	export from cell	10637	23195	2.12494
190	0.000733166	398	177	19	0.107345	0.0477387	GO:0030155	GO:BP	regulation of cell adhesion	10637	7777	2.86891
191	0.000744519	1631	177	48	0.271186	0.0294298	GO:0051239	GO:BP	regulation of multicellular organismal process	10637	15837	1.76861
192	0.000772053	1586	177	47	0.265537	0.0296343	GO:0031324	GO:BP	negative regulation of cellular metabolic process	10637	8321	1.7809
193	0.000786941	1683	177	49	0.276836	0.0291147	GO:0048513	GO:BP	animal organ development	10637	14963	1.74968
194	0.000880808	749	177	28	0.158192	0.0373832	GO:0033365	GO:BP	protein localization to organelle	10637	9468	2.24658
195	0.00092535	5	177	3	0.0169492	0.6	GO:2000271	GO:BP	positive regulation of fibroblast apoptotic process	10637	29539	36.0576
196	0.000928253	406	177	19	0.107345	0.046798	GO:0006954	GO:BP	inflammatory response	10637	2921	2.81238
197	0.000928253	101	177	9	0.0508475	0.0891089	GO:0042129	GO:BP	regulation of T cell proliferation	10637	11638	5.35509
198	0.00100253	241	177	14	0.079096	0.0580913	GO:0009615	GO:BP	response to virus	10637	4021	3.49106
199	0.00100253	25	177	5	0.0282486	0.2	GO:0050886	GO:BP	endocrine process	10637	15538	12.0192
200	0.00100253	519	177	22	0.124294	0.0423892	GO:0014070	GO:BP	response to organic cyclic compound	10637	5228	2.54742
201	0.00110071	308	177	16	0.0903955	0.0519481	GO:0002768	GO:BP	immune response-regulating cell surface receptor signaling pathway	10637	1431	3.12187
202	0.00115282	60	177	7	0.039548	0.116667	GO:1902106	GO:BP	negative regulation of leukocyte differentiation	10637	25368	7.01121
203	0.00115282	681	177	26	0.146893	0.0381791	GO:1901698	GO:BP	response to nitrogen compound	10637	24975	2.29442
204	0.00115282	156	177	11	0.0621469	0.0705128	GO:0071216	GO:BP	cellular response to biotic stimulus	10637	19418	4.23754
205	0.00115612	310	177	16	0.0903955	0.0516129	GO:0002764	GO:BP	immune response-regulating signaling pathway	10637	1427	3.10173
206	0.00115612	245	177	14	0.079096	0.0571429	GO:0030098	GO:BP	lymphocyte differentiation	10637	7761	3.43406
207	0.00115612	932	177	32	0.180791	0.0343348	GO:0006886	GO:BP	intracellular protein transport	10637	2863	2.06338
208	0.00118921	1244	177	39	0.220339	0.0313505	GO:1901566	GO:BP	organonitrogen compound biosynthetic process	10637	24866	1.88404
209	0.00121525	42	177	6	0.0338983	0.142857	GO:0032623	GO:BP	interleukin-2 production	10637	8936	8.58515
210	0.00121797	82	177	8	0.0451977	0.097561	GO:0008630	GO:BP	intrinsic apoptotic signaling pathway in response to DNA damage	10637	3676	5.86303
211	0.00124158	61	177	7	0.039548	0.114754	GO:0032649	GO:BP	regulation of interferon-gamma production	10637	8962	6.89627
212	0.00126329	106	177	9	0.0508475	0.0849057	GO:1902107	GO:BP	positive regulation of leukocyte differentiation	10637	25369	5.10249
213	0.00130503	83	177	8	0.0451977	0.0963855	GO:0031960	GO:BP	response to corticosteroid	10637	8538	5.79239
214	0.00130503	281	177	15	0.0847458	0.0533808	GO:0002429	GO:BP	immune response-activating cell surface receptor signaling pathway	10637	1099	3.20797
215	0.00130503	281	177	15	0.0847458	0.0533808	GO:0002757	GO:BP	immune response-activating signal transduction	10637	1420	3.20797
216	0.00131445	188	177	12	0.0677966	0.0638298	GO:0048872	GO:BP	homeostasis of number of cells	10637	15291	3.83592
217	0.00131651	1072	177	35	0.19774	0.0326493	GO:0042592	GO:BP	homeostatic process	10637	11925	1.96209
218	0.00140404	1632	177	47	0.265537	0.028799	GO:0071705	GO:BP	nitrogen compound transport	10637	19851	1.73071
219	0.00143343	734	177	27	0.152542	0.0367847	GO:0071495	GO:BP	cellular response to endogenous stimulus	10637	19683	2.21062
220	0.00146853	63	177	7	0.039548	0.111111	GO:0071621	GO:BP	granulocyte chemotaxis	10637	19779	6.67734
221	0.00148545	695	177	26	0.146893	0.0374101	GO:1901701	GO:BP	cellular response to oxygen-containing compound	10637	24978	2.2482
222	0.00152027	135	177	10	0.0564972	0.0740741	GO:0071219	GO:BP	cellular response to molecule of bacterial origin	10637	19421	4.45156
223	0.0015985	6	177	3	0.0169492	0.5	GO:0002501	GO:BP	peptide antigen assembly with MHC protein complex	10637	1171	30.048
224	0.00168931	45	177	6	0.0338983	0.133333	GO:0002526	GO:BP	acute inflammatory response	10637	1195	8.01281
225	0.00174659	467	177	20	0.112994	0.0428266	GO:0001817	GO:BP	regulation of cytokine production	10637	601	2.57371
226	0.00178146	324	177	16	0.0903955	0.0493827	GO:0045596	GO:BP	negative regulation of cell differentiation	10637	13448	2.96771
227	0.00178807	138	177	10	0.0564972	0.0724638	GO:0002573	GO:BP	myeloid leukocyte differentiation	10637	1242	4.35479
228	0.00179609	166	177	11	0.0621469	0.0662651	GO:0045637	GO:BP	regulation of myeloid cell differentiation	10637	13489	3.98227
229	0.0018017	664	177	25	0.141243	0.0376506	GO:0006518	GO:BP	peptide metabolic process	10637	2526	2.26265
230	0.00183772	29	177	5	0.0282486	0.172414	GO:0071364	GO:BP	cellular response to epidermal growth factor stimulus	10637	19560	10.3614
231	0.00188793	66	177	7	0.039548	0.106061	GO:1990266	GO:BP	neutrophil migration	10637	28957	6.37382
232	0.00191456	1465	177	43	0.242938	0.0293515	GO:0051172	GO:BP	negative regulation of nitrogen compound metabolic process	10637	15781	1.76391
233	0.00204211	670	177	25	0.141243	0.0373134	GO:0002520	GO:BP	immune system development	10637	1189	2.24239
234	0.00207558	141	177	10	0.0564972	0.070922	GO:0050870	GO:BP	positive regulation of T cell activation	10637	15526	4.26213
235	0.0020889	1377	177	41	0.231638	0.0297749	GO:0050793	GO:BP	regulation of developmental process	10637	15461	1.78935
236	0.00209807	30	177	5	0.0282486	0.166667	GO:1902229	GO:BP	regulation of intrinsic apoptotic signaling pathway in response to DNA damage	10637	25482	10.016
237	0.00209807	330	177	16	0.0903955	0.0484848	GO:0071407	GO:BP	cellular response to organic cyclic compound	10637	19603	2.91375
238	0.00209807	1057	177	34	0.19209	0.0321665	GO:2000026	GO:BP	regulation of multicellular organismal development	10637	29296	1.93308
239	0.00209807	2112	177	56	0.316384	0.0265152	GO:0033036	GO:BP	macromolecule localization	10637	9271	1.59346
240	0.00213791	200	177	12	0.0677966	0.06	GO:0051235	GO:BP	maintenance of location	10637	15833	3.60576
241	0.00219059	68	177	7	0.039548	0.102941	GO:0032609	GO:BP	interferon-gamma production	10637	8922	6.18636
242	0.00220154	1621	177	46	0.259887	0.0283775	GO:0032268	GO:BP	regulation of cellular protein metabolic process	10637	8707	1.70538
243	0.00220154	171	177	11	0.0621469	0.0643275	GO:0050673	GO:BP	epithelial cell proliferation	10637	15390	3.86583
244	0.00220154	91	177	8	0.0451977	0.0879121	GO:0051250	GO:BP	negative regulation of lymphocyte activation	10637	15845	5.28317
245	0.00229395	172	177	11	0.0621469	0.0639535	GO:0022409	GO:BP	positive regulation of cell-cell adhesion	10637	7640	3.84335
246	0.00235933	519	177	21	0.118644	0.0404624	GO:0001816	GO:BP	cytokine production	10637	600	2.43163
247	0.00243172	680	177	25	0.141243	0.0367647	GO:0043604	GO:BP	amide biosynthetic process	10637	12533	2.20941
248	0.00245067	17	177	4	0.0225989	0.235294	GO:0000028	GO:BP	ribosomal small subunit assembly	10637	15	14.1402
249	0.0024647	49	177	6	0.0338983	0.122449	GO:0002792	GO:BP	negative regulation of peptide secretion	10637	1455	7.3587
250	0.0024647	7	177	3	0.0169492	0.428571	GO:0002396	GO:BP	MHC protein complex assembly	10637	1066	25.7554
251	0.00263578	1118	177	35	0.19774	0.0313059	GO:0006468	GO:BP	protein phosphorylation	10637	2480	1.88136
252	0.00264041	853	177	29	0.163842	0.0339977	GO:0009888	GO:BP	tissue development	10637	4249	2.04312
253	0.00272084	32	177	5	0.0282486	0.15625	GO:0070849	GO:BP	response to epidermal growth factor	10637	19257	9.39001
254	0.00297472	2042	177	54	0.305085	0.0264447	GO:0031325	GO:BP	positive regulation of cellular metabolic process	10637	8322	1.58922
255	0.00297523	72	177	7	0.039548	0.0972222	GO:0002576	GO:BP	platelet degranulation	10637	1245	5.84267
256	0.00299256	609	177	23	0.129944	0.0377668	GO:0030097	GO:BP	hemopoiesis	10637	7760	2.26964
257	0.00315046	275	177	14	0.079096	0.0509091	GO:0006935	GO:BP	chemotaxis	10637	2907	3.05944
258	0.00338154	277	177	14	0.079096	0.0505415	GO:0042330	GO:BP	taxis	10637	11759	3.03735
259	0.00338154	4121	177	92	0.519774	0.0223247	GO:1901564	GO:BP	organonitrogen compound metabolic process	10637	24864	1.34162
260	0.00345341	74	177	7	0.039548	0.0945946	GO:0051384	GO:BP	response to glucocorticoid	10637	15952	5.68476
261	0.00345341	98	177	8	0.0451977	0.0816327	GO:0045580	GO:BP	regulation of T cell differentiation	10637	13432	4.9058
262	0.00349771	348	177	16	0.0903955	0.045977	GO:0070848	GO:BP	response to growth factor	10637	19256	2.76304
263	0.0035073	213	177	12	0.0677966	0.056338	GO:0002237	GO:BP	response to molecule of bacterial origin	10637	908	3.38569
264	0.0035073	34	177	5	0.0282486	0.147059	GO:0071385	GO:BP	cellular response to glucocorticoid stimulus	10637	19581	8.83765
265	0.0035875	153	177	10	0.0564972	0.0653595	GO:0043406	GO:BP	positive regulation of MAP kinase activity	10637	12396	3.92785
266	0.0036254	19	177	4	0.0225989	0.210526	GO:0032673	GO:BP	regulation of interleukin-4 production	10637	8986	12.6518
267	0.00363365	8	177	3	0.0169492	0.375	GO:0045657	GO:BP	positive regulation of monocyte differentiation	10637	13509	22.536
268	0.00363365	8	177	3	0.0169492	0.375	GO:0045647	GO:BP	negative regulation of erythrocyte differentiation	10637	13499	22.536
269	0.00365581	744	177	26	0.146893	0.0349462	GO:0016071	GO:BP	mRNA metabolic process	10637	5718	2.10013
270	0.00374051	1913	177	51	0.288136	0.0266597	GO:0008104	GO:BP	protein localization	10637	3564	1.60214
271	0.00393293	35	177	5	0.0282486	0.142857	GO:0071384	GO:BP	cellular response to corticosteroid stimulus	10637	19580	8.58515
272	0.00409047	156	177	10	0.0564972	0.0641026	GO:1903039	GO:BP	positive regulation of leukocyte cell-cell adhesion	10637	26175	3.85231
273	0.00411717	2	177	2	0.0112994	1	GO:1902766	GO:BP	skeletal muscle satellite cell migration	10637	25923	60.096
274	0.00411752	284	177	14	0.079096	0.0492958	GO:2001233	GO:BP	regulation of apoptotic signaling pathway	10637	30446	2.96248
275	0.00417096	429	177	18	0.101695	0.041958	GO:0097190	GO:BP	apoptotic signaling pathway	10637	21904	2.52151
276	0.00417253	1432	177	41	0.231638	0.0286313	GO:0032879	GO:BP	regulation of localization	10637	9149	1.72063
277	0.0042801	20	177	4	0.0225989	0.2	GO:0046627	GO:BP	negative regulation of insulin receptor signaling pathway	10637	14365	12.0192
278	0.0042801	20	177	4	0.0225989	0.2	GO:1903579	GO:BP	negative regulation of ATP metabolic process	10637	26656	12.0192
279	0.00428429	628	177	23	0.129944	0.0366242	GO:0048534	GO:BP	hematopoietic or lymphoid organ development	10637	14982	2.20097
280	0.00430568	129	177	9	0.0508475	0.0697674	GO:0071222	GO:BP	cellular response to lipopolysaccharide	10637	19424	4.19275
281	0.00434594	36	177	5	0.0282486	0.138889	GO:0032663	GO:BP	regulation of interleukin-2 production	10637	8976	8.34667
282	0.00445651	322	177	15	0.0847458	0.0465839	GO:1901652	GO:BP	response to peptide	10637	24939	2.79951
283	0.00448451	103	177	8	0.0451977	0.0776699	GO:0022408	GO:BP	negative regulation of cell-cell adhesion	10637	7639	4.66765
284	0.00449194	1931	177	51	0.288136	0.0264112	GO:0051173	GO:BP	positive regulation of nitrogen compound metabolic process	10637	15782	1.58721
285	0.00469059	933	177	30	0.169492	0.0321543	GO:0051049	GO:BP	regulation of transport	10637	15680	1.93235
286	0.00473491	79	177	7	0.039548	0.0886076	GO:0097530	GO:BP	granulocyte migration	10637	22081	5.32497
287	0.00479985	474	177	19	0.107345	0.0400844	GO:0010942	GO:BP	positive regulation of cell death	10637	5105	2.40891
288	0.00483744	37	177	5	0.0282486	0.135135	GO:0002763	GO:BP	positive regulation of myeloid leukocyte differentiation	10637	1426	8.12109
289	0.00490162	1739	177	47	0.265537	0.027027	GO:0065009	GO:BP	regulation of molecular function	10637	18772	1.62422
290	0.00496868	21	177	4	0.0225989	0.190476	GO:1900077	GO:BP	negative regulation of cellular response to insulin stimulus	10637	23435	11.4469
291	0.00496868	105	177	8	0.0451977	0.0761905	GO:0042742	GO:BP	defense response to bacterium	10637	12014	4.57875
292	0.00496868	21	177	4	0.0225989	0.190476	GO:0019883	GO:BP	antigen processing and presentation of endogenous antigen	10637	7051	11.4469
293	0.00507129	939	177	30	0.169492	0.0319489	GO:0080134	GO:BP	regulation of response to stress	10637	21076	1.92
294	0.00507129	939	177	30	0.169492	0.0319489	GO:0009967	GO:BP	positive regulation of signal transduction	10637	4308	1.92
295	0.00519119	193	177	11	0.0621469	0.0569948	GO:0048545	GO:BP	response to steroid hormone	10637	14993	3.42516
296	0.00583465	59	177	6	0.0338983	0.101695	GO:0042255	GO:BP	ribosome assembly	10637	11721	6.11146
297	0.00588795	108	177	8	0.0451977	0.0740741	GO:0002695	GO:BP	negative regulation of leukocyte activation	10637	1364	4.45156
298	0.00588795	262	177	13	0.0734463	0.0496183	GO:0042060	GO:BP	wound healing	10637	11594	2.98186
299	0.00599142	39	177	5	0.0282486	0.128205	GO:0050766	GO:BP	positive regulation of phagocytosis	10637	15440	7.70462
300	0.00620335	1465	177	41	0.231638	0.0279863	GO:0015833	GO:BP	peptide transport	10637	5545	1.68187
301	0.00625105	137	177	9	0.0508475	0.0656934	GO:1903708	GO:BP	positive regulation of hemopoiesis	10637	26782	3.94792
302	0.00644248	3351	177	77	0.435028	0.0229782	GO:0044267	GO:BP	cellular protein metabolic process	10637	12808	1.3809
303	0.00656195	3690	177	83	0.468927	0.0224932	GO:0010467	GO:BP	gene expression	10637	4689	1.35175
304	0.0067155	1717	177	46	0.259887	0.0267909	GO:0051246	GO:BP	regulation of protein metabolic process	10637	15841	1.61003
305	0.00733219	112	177	8	0.0451977	0.0714286	GO:0097529	GO:BP	myeloid leukocyte migration	10637	22080	4.29257
306	0.00736237	269	177	13	0.0734463	0.0483271	GO:0043410	GO:BP	positive regulation of MAPK cascade	10637	12400	2.90427
307	0.00739405	41	177	5	0.0282486	0.121951	GO:0046626	GO:BP	regulation of insulin receptor signaling pathway	10637	14364	7.32879
308	0.0074456	378	177	16	0.0903955	0.042328	GO:0032870	GO:BP	cellular response to hormone stimulus	10637	9140	2.54375
309	0.00750296	8799	177	162	0.915254	0.0184112	GO:0009987	GO:BP	cellular process	10637	4314	1.10644
310	0.0076195	1482	177	41	0.231638	0.0276653	GO:0042886	GO:BP	amide transport	10637	12117	1.66258
311	0.00796618	24	177	4	0.0225989	0.166667	GO:0032633	GO:BP	interleukin-4 production	10637	8946	10.016
312	0.00854821	115	177	8	0.0451977	0.0695652	GO:0050866	GO:BP	negative regulation of cell activation	10637	15522	4.18059
313	0.00883518	11	177	3	0.0169492	0.272727	GO:0046135	GO:BP	pyrimidine nucleoside catabolic process	10637	13957	16.3898
314	0.00885578	502	177	19	0.107345	0.0378486	GO:0048646	GO:BP	anatomical structure formation involved in morphogenesis	10637	15075	2.27455
315	0.00885578	502	177	19	0.107345	0.0378486	GO:0000165	GO:BP	MAPK cascade	10637	72	2.27455
316	0.00909868	386	177	16	0.0903955	0.0414508	GO:0097435	GO:BP	supramolecular fiber organization	10637	22048	2.49103
317	0.00915525	25	177	4	0.0225989	0.16	GO:0045581	GO:BP	negative regulation of T cell differentiation	10637	13433	9.61537
318	0.00915525	25	177	4	0.0225989	0.16	GO:0032743	GO:BP	positive regulation of interleukin-2 production	10637	9056	9.61537
319	0.00931098	1450	177	40	0.225989	0.0275862	GO:0015031	GO:BP	protein transport	10637	5392	1.65782
320	0.00932027	209	177	11	0.0621469	0.0526316	GO:0071902	GO:BP	positive regulation of protein serine/threonine kinase activity	10637	19970	3.16295
321	0.00932027	209	177	11	0.0621469	0.0526316	GO:0050727	GO:BP	regulation of inflammatory response	10637	15413	3.16295
322	0.00940388	1648	177	44	0.248588	0.026699	GO:0044248	GO:BP	cellular catabolic process	10637	12796	1.60451
323	0.00970093	147	177	9	0.0508475	0.0612245	GO:0050678	GO:BP	regulation of epithelial cell proliferation	10637	15395	3.67935
324	0.00970093	507	177	19	0.107345	0.0374753	GO:0023014	GO:BP	signal transduction by protein phosphorylation	10637	7683	2.25212
325	0.00972283	44	177	5	0.0282486	0.113636	GO:0045071	GO:BP	negative regulation of viral genome replication	10637	13226	6.8291
326	0.00981103	1075	177	32	0.180791	0.0297674	GO:0009057	GO:BP	macromolecule catabolic process	10637	3695	1.78891
327	0.00989068	3	177	2	0.0112994	0.666667	GO:0002445	GO:BP	type II hypersensitivity	10637	1115	40.064
328	0.00989068	3	177	2	0.0112994	0.666667	GO:0016068	GO:BP	type I hypersensitivity	10637	5716	40.064
329	0.00989068	3	177	2	0.0112994	0.666667	GO:0014805	GO:BP	smooth muscle adaptation	10637	5278	40.064
330	0.00989068	3	177	2	0.0112994	0.666667	GO:0001810	GO:BP	regulation of type I hypersensitivity	10637	594	40.064
331	0.00989068	3	177	2	0.0112994	0.666667	GO:0010710	GO:BP	regulation of collagen catabolic process	10637	4892	40.064
332	0.00989068	3	177	2	0.0112994	0.666667	GO:0003084	GO:BP	positive regulation of systemic arterial blood pressure	10637	1687	40.064
333	0.00989068	3	177	2	0.0112994	0.666667	GO:0001794	GO:BP	type IIa hypersensitivity	10637	578	40.064
334	0.00989068	3	177	2	0.0112994	0.666667	GO:1904580	GO:BP	regulation of intracellular mRNA localization	10637	27568	40.064
335	0.00989068	3	177	2	0.0112994	0.666667	GO:1904582	GO:BP	positive regulation of intracellular mRNA localization	10637	27570	40.064
336	0.00989068	119	177	8	0.0451977	0.0672269	GO:0045444	GO:BP	fat cell differentiation	10637	13359	4.04007
337	0.00989068	3	177	2	0.0112994	0.666667	GO:0001796	GO:BP	regulation of type IIa hypersensitivity	10637	580	40.064
338	0.00989068	3	177	2	0.0112994	0.666667	GO:0002892	GO:BP	regulation of type II hypersensitivity	10637	1554	40.064
339	0.00990082	986	177	30	0.169492	0.030426	GO:0009890	GO:BP	negative regulation of biosynthetic process	10637	4251	1.82848
340	0.00991706	3576	177	80	0.451977	0.0223714	GO:0019538	GO:BP	protein metabolic process	10637	6824	1.34443
341	0.0099314	246	177	12	0.0677966	0.0487805	GO:1901653	GO:BP	cellular response to peptide	10637	24940	2.93151
342	0.00995849	92	177	7	0.039548	0.076087	GO:0000187	GO:BP	activation of MAPK activity	10637	82	4.57253
343	0.00995849	92	177	7	0.039548	0.076087	GO:0030218	GO:BP	erythrocyte differentiation	10637	7817	4.57253
344	0.0109014	1765	177	46	0.259887	0.0260623	GO:0009966	GO:BP	regulation of signal transduction	10637	4307	1.56624
345	0.0109735	435	177	17	0.0960452	0.0390805	GO:0043065	GO:BP	positive regulation of apoptotic process	10637	12222	2.34858
346	0.0112226	46	177	5	0.0282486	0.108696	GO:0034109	GO:BP	homotypic cell-cell adhesion	10637	9746	6.53218
347	0.011341	122	177	8	0.0451977	0.0655738	GO:2000377	GO:BP	regulation of reactive oxygen species metabolic process	10637	29642	3.94072
348	0.0113779	437	177	17	0.0960452	0.0389016	GO:0031347	GO:BP	regulation of defense response	10637	8343	2.33783
349	0.0113779	152	177	9	0.0508475	0.0592105	GO:2001234	GO:BP	negative regulation of apoptotic signaling pathway	10637	30447	3.55832
350	0.0113779	152	177	9	0.0508475	0.0592105	GO:0007162	GO:BP	negative regulation of cell adhesion	10637	3097	3.55832
351	0.0114156	69	177	6	0.0338983	0.0869565	GO:0071774	GO:BP	response to fibroblast growth factor	10637	19887	5.22574
352	0.0115687	184	177	10	0.0564972	0.0543478	GO:0051607	GO:BP	defense response to virus	10637	16109	3.26609
353	0.0120912	47	177	5	0.0282486	0.106383	GO:1900076	GO:BP	regulation of cellular response to insulin stimulus	10637	23434	6.3932
354	0.0120912	440	177	17	0.0960452	0.0386364	GO:0043068	GO:BP	positive regulation of programmed cell death	10637	12225	2.32189
355	0.0120912	47	177	5	0.0282486	0.106383	GO:2001244	GO:BP	positive regulation of intrinsic apoptotic signaling pathway	10637	30457	6.3932
356	0.012109	401	177	16	0.0903955	0.0399002	GO:0007169	GO:BP	transmembrane receptor protein tyrosine kinase signaling pathway	10637	3104	2.39785
357	0.0126609	28	177	4	0.0225989	0.142857	GO:0045620	GO:BP	negative regulation of lymphocyte differentiation	10637	13472	8.58515
358	0.0126609	28	177	4	0.0225989	0.142857	GO:2000107	GO:BP	negative regulation of leukocyte apoptotic process	10637	29377	8.58515
359	0.0128849	13	177	3	0.0169492	0.230769	GO:2000269	GO:BP	regulation of fibroblast apoptotic process	10637	29537	13.8683
360	0.0128849	13	177	3	0.0169492	0.230769	GO:0060986	GO:BP	endocrine hormone secretion	10637	17890	13.8683
361	0.0128849	291	177	13	0.0734463	0.0446735	GO:0030099	GO:BP	myeloid cell differentiation	10637	7762	2.6847
362	0.0128849	71	177	6	0.0338983	0.084507	GO:2001243	GO:BP	negative regulation of intrinsic apoptotic signaling pathway	10637	30456	5.07854
363	0.0128849	13	177	3	0.0169492	0.230769	GO:0061158	GO:BP	3'-UTR-mediated mRNA destabilization	10637	18050	13.8683
364	0.0129738	48	177	5	0.0282486	0.104167	GO:0050709	GO:BP	negative regulation of protein secretion	10637	15409	6.26
365	0.0139277	223	177	11	0.0621469	0.0493274	GO:1902903	GO:BP	regulation of supramolecular fiber organization	10637	26049	2.96438
366	0.0140793	1106	177	32	0.180791	0.0289331	GO:1902531	GO:BP	regulation of intracellular signal transduction	10637	25734	1.73876
367	0.0142561	158	177	9	0.0508475	0.056962	GO:0050852	GO:BP	T cell receptor signaling pathway	10637	15508	3.42319
368	0.0143214	224	177	11	0.0621469	0.0491071	GO:0002696	GO:BP	positive regulation of leukocyte activation	10637	1365	2.95115
369	0.0151372	100	177	7	0.039548	0.07	GO:0034101	GO:BP	erythrocyte homeostasis	10637	9738	4.20672
370	0.0152294	3073	177	70	0.39548	0.022779	GO:0044271	GO:BP	cellular nitrogen compound biosynthetic process	10637	12811	1.36893
371	0.0155456	1852	177	47	0.265537	0.025378	GO:0009056	GO:BP	catabolic process	10637	3694	1.52512
372	0.0155456	74	177	6	0.0338983	0.0810811	GO:0048525	GO:BP	negative regulation of viral process	10637	14975	4.87265
373	0.0156976	1403	177	38	0.214689	0.0270848	GO:0050790	GO:BP	regulation of catalytic activity	10637	15459	1.62769
374	0.0157228	14	177	3	0.0169492	0.214286	GO:0045655	GO:BP	regulation of monocyte differentiation	10637	13507	12.8777
375	0.0157431	336	177	14	0.079096	0.0416667	GO:0071363	GO:BP	cellular response to growth factor stimulus	10637	19559	2.504
376	0.015781	130	177	8	0.0451977	0.0615385	GO:0051651	GO:BP	maintenance of location in cell	10637	16150	3.69822
377	0.0158685	976	177	29	0.163842	0.0297131	GO:0045595	GO:BP	regulation of cell differentiation	10637	13447	1.78564
378	0.0162314	1024	177	30	0.169492	0.0292969	GO:0010647	GO:BP	positive regulation of cell communication	10637	4833	1.76063
379	0.0162775	537	177	19	0.107345	0.0353818	GO:0007167	GO:BP	enzyme linked receptor protein signaling pathway	10637	3102	2.1263
380	0.0162775	376	177	15	0.0847458	0.0398936	GO:0071417	GO:BP	cellular response to organonitrogen compound	10637	19613	2.39745
381	0.0169303	1509	177	40	0.225989	0.0265076	GO:0045184	GO:BP	establishment of protein localization	10637	13274	1.593
382	0.0170903	4	177	2	0.0112994	0.5	GO:1902172	GO:BP	regulation of keratinocyte apoptotic process	10637	25425	30.048
383	0.0170903	4	177	2	0.0112994	0.5	GO:0030043	GO:BP	actin filament fragmentation	10637	7747	30.048
384	0.0170903	4	177	2	0.0112994	0.5	GO:0031394	GO:BP	positive regulation of prostaglandin biosynthetic process	10637	8358	30.048
385	0.0170903	4	177	2	0.0112994	0.5	GO:0097283	GO:BP	keratinocyte apoptotic process	10637	21953	30.048
386	0.0170903	196	177	10	0.0564972	0.0510204	GO:0050851	GO:BP	antigen receptor-mediated signaling pathway	10637	15507	3.06612
387	0.0175218	164	177	9	0.0508475	0.054878	GO:0072593	GO:BP	reactive oxygen species metabolic process	10637	20544	3.29795
388	0.017541	197	177	10	0.0564972	0.0507614	GO:0032147	GO:BP	activation of protein kinase activity	10637	8628	3.05056
389	0.017541	1031	177	30	0.169492	0.029098	GO:0023056	GO:BP	positive regulation of signaling	10637	7712	1.74867
390	0.0176078	584	177	20	0.112994	0.0342466	GO:0032101	GO:BP	regulation of response to external stimulus	10637	8606	2.05808
391	0.017843	232	177	11	0.0621469	0.0474138	GO:0050867	GO:BP	positive regulation of cell activation	10637	15523	2.84938
392	0.0179525	381	177	15	0.0847458	0.0393701	GO:0043408	GO:BP	regulation of MAPK cascade	10637	12398	2.36599
393	0.0179525	198	177	10	0.0564972	0.0505051	GO:0051251	GO:BP	positive regulation of lymphocyte activation	10637	15846	3.03515
394	0.0179525	165	177	9	0.0508475	0.0545455	GO:0050792	GO:BP	regulation of viral process	10637	15460	3.27797
395	0.0179857	77	177	6	0.0338983	0.0779221	GO:0002431	GO:BP	Fc receptor mediated stimulatory signaling pathway	10637	1101	4.68281
396	0.0180552	672	177	22	0.124294	0.0327381	GO:0032269	GO:BP	negative regulation of cellular protein metabolic process	10637	8708	1.96743
397	0.0181979	15	177	3	0.0169492	0.2	GO:0006953	GO:BP	acute-phase response	10637	2920	12.0192
398	0.0181979	15	177	3	0.0169492	0.2	GO:0030574	GO:BP	collagen catabolic process	10637	7963	12.0192
399	0.0181979	15	177	3	0.0169492	0.2	GO:1900153	GO:BP	positive regulation of nuclear-transcribed mRNA catabolic process, deadenylation-dependent decay	10637	23511	12.0192
400	0.0182191	269	177	12	0.0677966	0.0446097	GO:0030855	GO:BP	epithelial cell differentiation	10637	8088	2.68086
401	0.0184609	53	177	5	0.0282486	0.0943396	GO:0045638	GO:BP	negative regulation of myeloid cell differentiation	10637	13490	5.66944
402	0.0187018	270	177	12	0.0677966	0.0444444	GO:0043434	GO:BP	response to peptide hormone	10637	12413	2.67094
403	0.0190381	424	177	16	0.0903955	0.0377358	GO:0030029	GO:BP	actin filament-based process	10637	7735	2.26778
404	0.0193727	947	177	28	0.158192	0.0295671	GO:0044265	GO:BP	cellular macromolecule catabolic process	10637	12807	1.77686
405	0.0195175	136	177	8	0.0451977	0.0588235	GO:0097305	GO:BP	response to alcohol	10637	21973	3.53506
406	0.0196542	347	177	14	0.079096	0.0403458	GO:0033674	GO:BP	positive regulation of kinase activity	10637	9671	2.42462
407	0.0198337	1933	177	48	0.271186	0.0248319	GO:0010646	GO:BP	regulation of cell communication	10637	4832	1.4923
408	0.0200985	202	177	10	0.0564972	0.049505	GO:0043405	GO:BP	regulation of MAP kinase activity	10637	12395	2.97505
409	0.0211818	1238	177	34	0.19209	0.0274637	GO:0009891	GO:BP	positive regulation of biosynthetic process	10637	4252	1.65046
410	0.0213114	55	177	5	0.0282486	0.0909091	GO:2000106	GO:BP	regulation of leukocyte apoptotic process	10637	29376	5.46328
411	0.0214269	16	177	3	0.0169492	0.1875	GO:0044346	GO:BP	fibroblast apoptotic process	10637	12845	11.268
412	0.0214269	16	177	3	0.0169492	0.1875	GO:0002861	GO:BP	regulation of inflammatory response to antigenic stimulus	10637	1523	11.268
413	0.0215197	909	177	27	0.152542	0.029703	GO:0045934	GO:BP	negative regulation of nucleobase-containing compound metabolic process	10637	13764	1.78503
414	0.0215974	313	177	13	0.0734463	0.0415335	GO:0045860	GO:BP	positive regulation of protein kinase activity	10637	13696	2.496
415	0.0216385	9083	177	164	0.926554	0.0180557	GO:0008150	GO:BP	biological_process	10637	3565	1.08508
416	0.0216385	1097	177	31	0.175141	0.0282589	GO:0044093	GO:BP	positive regulation of molecular function	10637	12735	1.69825
417	0.0216598	171	177	9	0.0508475	0.0526316	GO:0110053	GO:BP	regulation of actin filament organization	10637	22853	3.16295
418	0.0216659	391	177	15	0.0847458	0.0383632	GO:0030036	GO:BP	actin cytoskeleton organization	10637	7742	2.30547
419	0.021807	205	177	10	0.0564972	0.0487805	GO:0032496	GO:BP	response to lipopolysaccharide	10637	8867	2.93151
420	0.0218915	314	177	13	0.0734463	0.0414013	GO:0006417	GO:BP	regulation of translation	10637	2440	2.48805
421	0.0224873	56	177	5	0.0282486	0.0892857	GO:0007043	GO:BP	cell-cell junction assembly	10637	2994	5.36572
422	0.022512	34	177	4	0.0225989	0.117647	GO:0038066	GO:BP	p38MAPK cascade	10637	11244	7.07012
423	0.0229749	316	177	13	0.0734463	0.0411392	GO:0006979	GO:BP	response to oxidative stress	10637	2942	2.47231
424	0.0230523	173	177	9	0.0508475	0.0520231	GO:0043903	GO:BP	regulation of symbiotic process	10637	12603	3.12638
425	0.0230878	517	177	18	0.101695	0.0348162	GO:0051050	GO:BP	positive regulation of transport	10637	15681	2.09232
426	0.0237889	1954	177	48	0.271186	0.024565	GO:0023051	GO:BP	regulation of signaling	10637	7707	1.47626
427	0.0238329	111	177	7	0.039548	0.0630631	GO:1901654	GO:BP	response to ketone	10637	24941	3.78984
428	0.0239252	57	177	5	0.0282486	0.0877193	GO:1904659	GO:BP	glucose transmembrane transport	10637	27643	5.27158
429	0.024646	1351	177	36	0.20339	0.0266469	GO:0046907	GO:BP	intracellular transport	10637	14564	1.60138
430	0.024646	17	177	3	0.0169492	0.176471	GO:1900151	GO:BP	regulation of nuclear-transcribed mRNA catabolic process, deadenylation-dependent decay	10637	23509	10.6052
431	0.0246627	358	177	14	0.079096	0.0391061	GO:0051046	GO:BP	regulation of secretion	10637	15677	2.35012
432	0.0246827	521	177	18	0.101695	0.0345489	GO:0045597	GO:BP	positive regulation of cell differentiation	10637	13449	2.07625
433	0.0247252	112	177	7	0.039548	0.0625	GO:1903900	GO:BP	regulation of viral life cycle	10637	26939	3.756
434	0.0248125	968	177	28	0.158192	0.0289256	GO:0031327	GO:BP	negative regulation of cellular biosynthetic process	10637	8324	1.73832
435	0.0248516	522	177	18	0.101695	0.0344828	GO:0000122	GO:BP	negative regulation of transcription by RNA polymerase II	10637	64	2.07228
436	0.0248516	480	177	17	0.0960452	0.0354167	GO:0007417	GO:BP	central nervous system development	10637	3326	2.1284
437	0.0248516	5	177	2	0.0112994	0.4	GO:2001280	GO:BP	positive regulation of unsaturated fatty acid biosynthetic process	10637	30493	24.0384
438	0.0248516	5	177	2	0.0112994	0.4	GO:0034112	GO:BP	positive regulation of homotypic cell-cell adhesion	10637	9749	24.0384
439	0.0251883	58	177	5	0.0282486	0.0862069	GO:0008645	GO:BP	hexose transmembrane transport	10637	3684	5.18069
440	0.0254133	360	177	14	0.079096	0.0388889	GO:0008285	GO:BP	negative regulation of cell population proliferation	10637	3604	2.33707
441	0.0255044	113	177	7	0.039548	0.0619469	GO:1901136	GO:BP	carbohydrate derivative catabolic process	10637	24469	3.72276
442	0.0255044	144	177	8	0.0451977	0.0555556	GO:0070371	GO:BP	ERK1 and ERK2 cascade	10637	18981	3.33867
443	0.0255044	144	177	8	0.0451977	0.0555556	GO:0060326	GO:BP	cell chemotaxis	10637	17252	3.33867
444	0.0262436	5737	177	114	0.644068	0.019871	GO:0043170	GO:BP	macromolecule metabolic process	10637	12284	1.19417
445	0.0266107	59	177	5	0.0282486	0.0847458	GO:0045582	GO:BP	positive regulation of T cell differentiation	10637	13434	5.09289
446	0.0266107	1165	177	32	0.180791	0.0274678	GO:0045935	GO:BP	positive regulation of nucleobase-containing compound metabolic process	10637	13765	1.65071
447	0.0266107	59	177	5	0.0282486	0.0847458	GO:0015749	GO:BP	monosaccharide transmembrane transport	10637	5468	5.09289
448	0.0266107	59	177	5	0.0282486	0.0847458	GO:0050764	GO:BP	regulation of phagocytosis	10637	15438	5.09289
449	0.0272787	930	177	27	0.152542	0.0290323	GO:0051240	GO:BP	positive regulation of multicellular organismal process	10637	15838	1.74472
450	0.0272787	528	177	18	0.101695	0.0340909	GO:0060429	GO:BP	epithelium development	10637	17347	2.04873
451	0.0272787	146	177	8	0.0451977	0.0547945	GO:0051495	GO:BP	positive regulation of cytoskeleton organization	10637	16028	3.29293
452	0.0276129	793	177	24	0.135593	0.0302648	GO:0001932	GO:BP	regulation of protein phosphorylation	10637	677	1.8188
453	0.0280611	704	177	22	0.124294	0.03125	GO:0051248	GO:BP	negative regulation of protein metabolic process	10637	15843	1.878
454	0.0281432	288	177	12	0.0677966	0.0416667	GO:0002831	GO:BP	regulation of response to biotic stimulus	10637	1493	2.504
455	0.0281432	60	177	5	0.0282486	0.0833333	GO:0048010	GO:BP	vascular endothelial growth factor receptor signaling pathway	10637	14611	5.008
456	0.0281432	60	177	5	0.0282486	0.0833333	GO:1903901	GO:BP	negative regulation of viral life cycle	10637	26940	5.008
457	0.0281892	251	177	11	0.0621469	0.0438247	GO:0045785	GO:BP	positive regulation of cell adhesion	10637	13631	2.63369
458	0.0287668	87	177	6	0.0338983	0.0689655	GO:0032946	GO:BP	positive regulation of mononuclear cell proliferation	10637	9205	4.14455
459	0.0287668	87	177	6	0.0338983	0.0689655	GO:0050671	GO:BP	positive regulation of lymphocyte proliferation	10637	15388	4.14455
460	0.0292858	1223	177	33	0.186441	0.0269828	GO:0031328	GO:BP	positive regulation of cellular biosynthetic process	10637	8325	1.62156
461	0.0294425	408	177	15	0.0847458	0.0367647	GO:1901699	GO:BP	cellular response to nitrogen compound	10637	24976	2.20941
462	0.0296256	253	177	11	0.0621469	0.0434783	GO:0007015	GO:BP	actin filament organization	10637	2970	2.61287
463	0.0296655	182	177	9	0.0508475	0.0494505	GO:0071356	GO:BP	cellular response to tumor necrosis factor	10637	19552	2.97178
464	0.029729	61	177	5	0.0282486	0.0819672	GO:0034219	GO:BP	carbohydrate transmembrane transport	10637	9842	4.92591
465	0.0300926	846	177	25	0.141243	0.0295508	GO:0043603	GO:BP	cellular amide metabolic process	10637	12532	1.77589
466	0.0306854	370	177	14	0.079096	0.0378378	GO:0007420	GO:BP	brain development	10637	3329	2.2739
467	0.0306854	38	177	4	0.0225989	0.105263	GO:0032233	GO:BP	positive regulation of actin filament bundle assembly	10637	8674	6.3259
468	0.0306854	118	177	7	0.039548	0.059322	GO:0030595	GO:BP	leukocyte chemotaxis	10637	7979	3.56502
469	0.0309576	150	177	8	0.0451977	0.0533333	GO:0002440	GO:BP	production of molecular mediator of immune response	10637	1110	3.20512
470	0.0311328	19	177	3	0.0169492	0.157895	GO:1901099	GO:BP	negative regulation of signal transduction in absence of ligand	10637	24433	9.48885
471	0.0311328	19	177	3	0.0169492	0.157895	GO:2001240	GO:BP	negative regulation of extrinsic apoptotic signaling pathway in absence of ligand	10637	30453	9.48885
472	0.0311328	19	177	3	0.0169492	0.157895	GO:0044319	GO:BP	wound healing, spreading of cells	10637	12823	9.48885
473	0.0311328	19	177	3	0.0169492	0.157895	GO:0090505	GO:BP	epiboly involved in wound healing	10637	21675	9.48885
474	0.0311703	62	177	5	0.0282486	0.0806452	GO:1903426	GO:BP	regulation of reactive oxygen species biosynthetic process	10637	26511	4.84646
475	0.0311703	62	177	5	0.0282486	0.0806452	GO:0042102	GO:BP	positive regulation of T cell proliferation	10637	11619	4.84646
476	0.0318206	1380	177	36	0.20339	0.026087	GO:0016192	GO:BP	vesicle-mediated transport	10637	5792	1.56772
477	0.0318619	220	177	10	0.0564972	0.0454545	GO:0002791	GO:BP	regulation of peptide secretion	10637	1454	2.73164
478	0.0319514	1531	177	39	0.220339	0.0254735	GO:1901575	GO:BP	organic substance catabolic process	10637	24874	1.53086
479	0.0319514	185	177	9	0.0508475	0.0486486	GO:0001503	GO:BP	ossification	10637	439	2.92359
480	0.0325603	90	177	6	0.0338983	0.0666667	GO:0051048	GO:BP	negative regulation of secretion	10637	15679	4.0064
481	0.0327744	39	177	4	0.0225989	0.102564	GO:0019730	GO:BP	antimicrobial humoral response	10637	6993	6.1637
482	0.0327744	39	177	4	0.0225989	0.102564	GO:0045646	GO:BP	regulation of erythrocyte differentiation	10637	13498	6.1637
483	0.0328584	6	177	2	0.0112994	0.333333	GO:0097011	GO:BP	cellular response to granulocyte macrophage colony-stimulating factor stimulus	10637	21805	20.032
484	0.0328584	6	177	2	0.0112994	0.333333	GO:0097012	GO:BP	response to granulocyte macrophage colony-stimulating factor	10637	21806	20.032
485	0.0328584	6	177	2	0.0112994	0.333333	GO:0003071	GO:BP	renal system process involved in regulation of systemic arterial blood pressure	10637	1675	20.032
486	0.0328584	6	177	2	0.0112994	0.333333	GO:0042989	GO:BP	sequestering of actin monomers	10637	12167	20.032
487	0.0328584	6	177	2	0.0112994	0.333333	GO:0060556	GO:BP	regulation of vitamin D biosynthetic process	10637	17470	20.032
488	0.0328584	6	177	2	0.0112994	0.333333	GO:0035740	GO:BP	CD8-positive, alpha-beta T cell proliferation	10637	10670	20.032
489	0.0328584	6	177	2	0.0112994	0.333333	GO:1903026	GO:BP	negative regulation of RNA polymerase II regulatory region sequence-specific DNA binding	10637	26164	20.032
490	0.0328584	6	177	2	0.0112994	0.333333	GO:2000564	GO:BP	regulation of CD8-positive, alpha-beta T cell proliferation	10637	29823	20.032
491	0.0328584	1484	177	38	0.214689	0.0256065	GO:0016310	GO:BP	phosphorylation	10637	5827	1.53885
492	0.0333356	297	177	12	0.0677966	0.040404	GO:0055065	GO:BP	metal ion homeostasis	10637	16919	2.42812
493	0.0334234	121	177	7	0.039548	0.0578512	GO:0002819	GO:BP	regulation of adaptive immune response	10637	1481	3.47663
494	0.0337411	1046	177	29	0.163842	0.0277247	GO:0051254	GO:BP	positive regulation of RNA metabolic process	10637	15849	1.66614
495	0.0338142	5053	177	102	0.576271	0.020186	GO:0044260	GO:BP	cellular macromolecule metabolic process	10637	12804	1.2131
496	0.0339297	459	177	16	0.0903955	0.0348584	GO:0008284	GO:BP	positive regulation of cell population proliferation	10637	3603	2.09485
497	0.0341607	588	177	19	0.107345	0.0323129	GO:0010562	GO:BP	positive regulation of phosphorus metabolic process	10637	4754	1.94188
498	0.0341607	20	177	3	0.0169492	0.15	GO:0009164	GO:BP	nucleoside catabolic process	10637	3797	9.01441
499	0.0341607	20	177	3	0.0169492	0.15	GO:0090504	GO:BP	epiboly	10637	21674	9.01441
500	0.0341607	20	177	3	0.0169492	0.15	GO:0033032	GO:BP	regulation of myeloid cell apoptotic process	10637	9268	9.01441
501	0.0341607	588	177	19	0.107345	0.0323129	GO:0045937	GO:BP	positive regulation of phosphate metabolic process	10637	13767	1.94188
502	0.034518	40	177	4	0.0225989	0.1	GO:0032963	GO:BP	collagen metabolic process	10637	9221	6.0096
503	0.0349515	1098	177	30	0.169492	0.0273224	GO:0031399	GO:BP	regulation of protein modification process	10637	8362	1.64197
504	0.0360313	65	177	5	0.0282486	0.0769231	GO:1903313	GO:BP	positive regulation of mRNA metabolic process	10637	26404	4.62277
505	0.0362321	93	177	6	0.0338983	0.0645161	GO:0032675	GO:BP	regulation of interleukin-6 production	10637	8988	3.87716
506	0.0362321	93	177	6	0.0338983	0.0645161	GO:0070665	GO:BP	positive regulation of leukocyte proliferation	10637	19156	3.87716
507	0.0362321	263	177	11	0.0621469	0.0418251	GO:0043269	GO:BP	regulation of ion transport	10637	12312	2.51352
508	0.0366274	637	177	20	0.112994	0.0313972	GO:0044092	GO:BP	negative regulation of molecular function	10637	12734	1.88685
509	0.0370584	960	177	27	0.152542	0.028125	GO:0032270	GO:BP	positive regulation of cellular protein metabolic process	10637	8709	1.6902
510	0.0370584	382	177	14	0.079096	0.0366492	GO:0035239	GO:BP	tube morphogenesis	10637	10326	2.20247
511	0.0370584	41	177	4	0.0225989	0.097561	GO:0061014	GO:BP	positive regulation of mRNA catabolic process	10637	17916	5.86303
512	0.0370584	41	177	4	0.0225989	0.097561	GO:0002720	GO:BP	positive regulation of cytokine production involved in immune response	10637	1389	5.86303
513	0.0380425	192	177	9	0.0508475	0.046875	GO:0031098	GO:BP	stress-activated protein kinase signaling cascade	10637	8210	2.817
514	0.0381531	21	177	3	0.0169492	0.142857	GO:0032897	GO:BP	negative regulation of viral transcription	10637	9163	8.58515
515	0.0381531	21	177	3	0.0169492	0.142857	GO:0045601	GO:BP	regulation of endothelial cell differentiation	10637	13453	8.58515
516	0.0381531	21	177	3	0.0169492	0.142857	GO:0045616	GO:BP	regulation of keratinocyte differentiation	10637	13468	8.58515
517	0.0381531	1253	177	33	0.186441	0.0263368	GO:0009653	GO:BP	anatomical structure morphogenesis	10637	4056	1.58274
518	0.0385199	266	177	11	0.0621469	0.0413534	GO:0006875	GO:BP	cellular metal ion homeostasis	10637	2852	2.48517
519	0.038813	229	177	10	0.0564972	0.0436681	GO:0032970	GO:BP	regulation of actin filament-based process	10637	9227	2.62428
520	0.0391998	95	177	6	0.0338983	0.0631579	GO:0002181	GO:BP	cytoplasmic translation	10637	865	3.79554
521	0.0396239	67	177	5	0.0282486	0.0746269	GO:0044344	GO:BP	cellular response to fibroblast growth factor stimulus	10637	12843	4.48478
522	0.0396239	42	177	4	0.0225989	0.0952381	GO:0007498	GO:BP	mesoderm development	10637	3400	5.72343
523	0.0412245	736	177	22	0.124294	0.0298913	GO:0009968	GO:BP	negative regulation of signal transduction	10637	4309	1.79635
524	0.041836	7	177	2	0.0112994	0.285714	GO:0002862	GO:BP	negative regulation of inflammatory response to antigenic stimulus	10637	1524	17.1703
525	0.041836	515	177	17	0.0960452	0.0330097	GO:0001934	GO:BP	positive regulation of protein phosphorylation	10637	679	1.98375
526	0.041836	2031	177	48	0.271186	0.0236337	GO:0006796	GO:BP	phosphate-containing compound metabolic process	10637	2786	1.42029
527	0.041836	7	177	2	0.0112994	0.285714	GO:0031086	GO:BP	nuclear-transcribed mRNA catabolic process, deadenylation-independent decay	10637	8208	17.1703
528	0.041836	68	177	5	0.0282486	0.0735294	GO:0045639	GO:BP	positive regulation of myeloid cell differentiation	10637	13491	4.41883
529	0.041836	7	177	2	0.0112994	0.285714	GO:0046133	GO:BP	pyrimidine ribonucleoside catabolic process	10637	13955	17.1703
530	0.041836	7	177	2	0.0112994	0.285714	GO:0046131	GO:BP	pyrimidine ribonucleoside metabolic process	10637	13953	17.1703
531	0.041836	7	177	2	0.0112994	0.285714	GO:0051238	GO:BP	sequestering of metal ion	10637	15836	17.1703
532	0.041836	7	177	2	0.0112994	0.285714	GO:0002883	GO:BP	regulation of hypersensitivity	10637	1545	17.1703
533	0.041836	7	177	2	0.0112994	0.285714	GO:1902231	GO:BP	positive regulation of intrinsic apoptotic signaling pathway in response to DNA damage	10637	25484	17.1703
534	0.041836	7	177	2	0.0112994	0.285714	GO:0031392	GO:BP	regulation of prostaglandin biosynthetic process	10637	8356	17.1703
535	0.0419391	22	177	3	0.0169492	0.136364	GO:0030224	GO:BP	monocyte differentiation	10637	7823	8.19492
536	0.0419391	97	177	6	0.0338983	0.0618557	GO:0002700	GO:BP	regulation of production of molecular mediator of immune response	10637	1369	3.71728
537	0.0419391	22	177	3	0.0169492	0.136364	GO:1903131	GO:BP	mononuclear cell differentiation	10637	26259	8.19492
538	0.0419391	22	177	3	0.0169492	0.136364	GO:1902230	GO:BP	negative regulation of intrinsic apoptotic signaling pathway in response to DNA damage	10637	25483	8.19492
539	0.0419494	785	177	23	0.129944	0.0292994	GO:0010648	GO:BP	negative regulation of cell communication	10637	4834	1.76078
540	0.0425125	786	177	23	0.129944	0.0292621	GO:0023057	GO:BP	negative regulation of signaling	10637	7713	1.75854
541	0.0431888	1120	177	30	0.169492	0.0267857	GO:0007399	GO:BP	nervous system development	10637	3311	1.60972
542	0.0434982	311	177	12	0.0677966	0.0385852	GO:0001819	GO:BP	positive regulation of cytokine production	10637	603	2.31882
543	0.0436457	1170	177	31	0.175141	0.0264957	GO:0010557	GO:BP	positive regulation of macromolecule biosynthetic process	10637	4749	1.59229
544	0.0437494	198	177	9	0.0508475	0.0454545	GO:0034612	GO:BP	response to tumor necrosis factor	10637	10049	2.73164
545	0.044682	130	177	7	0.039548	0.0538462	GO:0008544	GO:BP	epidermis development	10637	3649	3.23594
546	0.0446972	44	177	4	0.0225989	0.0909091	GO:0038034	GO:BP	signal transduction in absence of ligand	10637	11232	5.46328
547	0.0446972	44	177	4	0.0225989	0.0909091	GO:0097192	GO:BP	extrinsic apoptotic signaling pathway in absence of ligand	10637	21906	5.46328
548	0.0452727	70	177	5	0.0282486	0.0714286	GO:0043200	GO:BP	response to amino acid	10637	12293	4.29257
549	0.0452727	70	177	5	0.0282486	0.0714286	GO:1903409	GO:BP	reactive oxygen species biosynthetic process	10637	26499	4.29257
550	0.0452727	70	177	5	0.0282486	0.0714286	GO:0045621	GO:BP	positive regulation of lymphocyte differentiation	10637	13473	4.29257
551	0.0461874	237	177	10	0.0564972	0.0421941	GO:0001525	GO:BP	angiogenesis	10637	451	2.5357
552	0.0461874	23	177	3	0.0169492	0.130435	GO:0033028	GO:BP	myeloid cell apoptotic process	10637	9264	7.83861
553	0.0461874	23	177	3	0.0169492	0.130435	GO:0032570	GO:BP	response to progesterone	10637	8902	7.83861
554	0.0461874	275	177	11	0.0621469	0.04	GO:0048514	GO:BP	blood vessel morphogenesis	10637	14964	2.40384
555	0.0461874	23	177	3	0.0169492	0.130435	GO:0006213	GO:BP	pyrimidine nucleoside metabolic process	10637	2263	7.83861
556	0.0462146	165	177	8	0.0451977	0.0484848	GO:0001818	GO:BP	negative regulation of cytokine production	10637	602	2.91375
557	0.0462628	935	177	26	0.146893	0.0278075	GO:0010558	GO:BP	negative regulation of macromolecule biosynthetic process	10637	4750	1.67112
558	0.0462628	396	177	14	0.079096	0.0353535	GO:0060322	GO:BP	head development	10637	17248	2.12461
559	0.0462628	2047	177	48	0.271186	0.0234489	GO:0006793	GO:BP	phosphorus metabolic process	10637	2783	1.40919
560	0.0462628	2970	177	65	0.367232	0.0218855	GO:0016070	GO:BP	RNA metabolic process	10637	5717	1.31523
561	0.0465687	100	177	6	0.0338983	0.06	GO:0032635	GO:BP	interleukin-6 production	10637	8948	3.60576
562	0.0469511	71	177	5	0.0282486	0.0704225	GO:0071357	GO:BP	cellular response to type I interferon	10637	19553	4.23212
563	0.0469511	71	177	5	0.0282486	0.0704225	GO:0060337	GO:BP	type I interferon signaling pathway	10637	17263	4.23212
564	0.0469724	45	177	4	0.0225989	0.0888889	GO:0032729	GO:BP	positive regulation of interferon-gamma production	10637	9042	5.34187
565	0.0473263	482	177	16	0.0903955	0.033195	GO:0045859	GO:BP	regulation of protein kinase activity	10637	13695	1.99489
566	0.047881	526	177	17	0.0960452	0.0323194	GO:0019725	GO:BP	cellular homeostasis	10637	6990	1.94227
567	0.0482001	317	177	12	0.0677966	0.0378549	GO:0032990	GO:BP	cell part morphogenesis	10637	9244	2.27493
568	0.0484441	133	177	7	0.039548	0.0526316	GO:1902905	GO:BP	positive regulation of supramolecular fiber organization	10637	26051	3.16295
569	0.0487779	358	177	13	0.0734463	0.0363128	GO:0034248	GO:BP	regulation of cellular amide metabolic process	10637	9864	2.18226
570	0.0499514	102	177	6	0.0338983	0.0588235	GO:0060485	GO:BP	mesenchyme development	10637	17402	3.53506
571	0.0499514	319	177	12	0.0677966	0.0376176	GO:0071900	GO:BP	regulation of protein serine/threonine kinase activity	10637	19968	2.26067
572	0.0499514	46	177	4	0.0225989	0.0869565	GO:0032945	GO:BP	negative regulation of mononuclear cell proliferation	10637	9204	5.22574
573	0.0499514	46	177	4	0.0225989	0.0869565	GO:0003014	GO:BP	renal system process	10637	1618	5.22574
574	0.0499514	102	177	6	0.0338983	0.0588235	GO:0002706	GO:BP	regulation of lymphocyte mediated immunity	10637	1375	3.53506
575	0.0499514	46	177	4	0.0225989	0.0869565	GO:0050672	GO:BP	negative regulation of lymphocyte proliferation	10637	15389	5.22574

## Sheet: CD14 Monocytes 1
	p_value	term_size	query_size	intersection_size	precision	recall	term_id	source	term_name	effective_domain_size	source_order	foldenrichment
1	3.10375e-54	2024	1082	374	0.345656	0.184783	GO:0002376	GO:BP	immune system process	12863	1046	2.19673
2	1.46134e-46	1390	1082	282	0.260628	0.202878	GO:0006955	GO:BP	immune response	12863	2922	2.41184
3	4.90954e-43	1504	1082	289	0.267098	0.192154	GO:0044419	GO:BP	interspecies interaction between organisms	12863	12890	2.28436
4	7.95989e-41	5145	1082	650	0.600739	0.126336	GO:0050896	GO:BP	response to stimulus	12863	15547	1.50191
5	1.12993e-40	3346	1082	483	0.446396	0.144351	GO:0006810	GO:BP	transport	12863	2800	1.71607
6	2.03883e-38	3427	1082	485	0.448244	0.141523	GO:0051234	GO:BP	establishment of localization	12863	15832	1.68245
7	2.03883e-38	4218	1082	560	0.51756	0.132764	GO:0051179	GO:BP	localization	12863	15788	1.57833
8	1.62735e-37	945	1082	206	0.190388	0.217989	GO:0045321	GO:BP	leukocyte activation	12863	13330	2.5915
9	1.62735e-37	1035	1082	218	0.201479	0.210628	GO:0001775	GO:BP	cell activation	12863	567	2.50398
10	1.25607e-36	928	1082	202	0.186691	0.217672	GO:0002252	GO:BP	immune effector process	12863	922	2.58773
11	4.9926e-36	2106	1082	342	0.316081	0.162393	GO:0051649	GO:BP	establishment of localization in cell	12863	16148	1.93056
12	1.75458e-35	2587	1082	392	0.362292	0.151527	GO:0042221	GO:BP	response to chemical	12863	11708	1.80138
13	1.81468e-34	2087	1082	336	0.310536	0.160997	GO:0010033	GO:BP	response to organic substance	12863	4348	1.91396
14	4.14058e-33	2054	1082	329	0.304067	0.160175	GO:0070887	GO:BP	cellular response to chemical stimulus	12863	19275	1.90419
15	2.7157e-32	1635	1082	280	0.25878	0.171254	GO:0009605	GO:BP	response to external stimulus	12863	4012	2.03589
16	2.00328e-31	10224	1082	1000	0.924214	0.0978091	GO:0008150	GO:BP	biological_process	12863	3565	1.16277
17	3.10434e-31	956	1082	195	0.180222	0.203975	GO:0009607	GO:BP	response to biotic stimulus	12863	4014	2.42489
18	3.72027e-31	9870	1082	978	0.903882	0.0990881	GO:0009987	GO:BP	cellular process	12863	4314	1.17798
19	4.14398e-31	2586	1082	380	0.351201	0.146945	GO:0051641	GO:BP	cellular localization	12863	16140	1.74691
20	1.10875e-30	1706	1082	284	0.262477	0.166471	GO:0071310	GO:BP	cellular response to organic substance	12863	19508	1.97904
21	1.212e-30	4306	1082	545	0.503697	0.126568	GO:0051716	GO:BP	cellular response to stimulus	12863	16204	1.50466
22	1.36124e-30	3549	1082	474	0.438078	0.133559	GO:0007154	GO:BP	cell communication	12863	3089	1.58777
23	2.88977e-30	578	1082	141	0.130314	0.243945	GO:0002366	GO:BP	leukocyte activation involved in immune response	12863	1036	2.90006
24	5.04068e-30	581	1082	141	0.130314	0.242685	GO:0002263	GO:BP	cell activation involved in immune response	12863	933	2.88508
25	6.71779e-30	3530	1082	470	0.434381	0.133144	GO:0023052	GO:BP	signaling	12863	7708	1.58284
26	6.92614e-30	470	1082	124	0.114603	0.26383	GO:0002444	GO:BP	myeloid leukocyte mediated immunity	12863	1114	3.13645
27	8.25961e-30	935	1082	189	0.174677	0.202139	GO:0043207	GO:BP	response to external biotic stimulus	12863	12295	2.40306
28	8.25961e-30	935	1082	189	0.174677	0.202139	GO:0051707	GO:BP	response to other organism	12863	16196	2.40306
29	1.44153e-29	6802	1082	754	0.696858	0.11085	GO:0050789	GO:BP	regulation of biological process	12863	15458	1.3178
30	2.36026e-29	590	1082	141	0.130314	0.238983	GO:0045055	GO:BP	regulated exocytosis	12863	13210	2.84107
31	3.0379e-29	3304	1082	446	0.4122	0.134988	GO:0007165	GO:BP	signal transduction	12863	3100	1.60476
32	6.69312e-29	1013	1082	197	0.18207	0.194472	GO:0002682	GO:BP	regulation of immune system process	12863	1351	2.31191
33	9.71957e-29	543	1082	133	0.122921	0.244936	GO:0002274	GO:BP	myeloid leukocyte activation	12863	944	2.91184
34	1.18911e-28	458	1082	120	0.110906	0.262009	GO:0043299	GO:BP	leukocyte degranulation	12863	12328	3.1148
35	1.96976e-28	630	1082	145	0.134011	0.230159	GO:0002443	GO:BP	leukocyte mediated immunity	12863	1113	2.73617
36	2.36386e-28	1023	1082	197	0.18207	0.192571	GO:0006952	GO:BP	defense response	12863	2919	2.28932
37	2.54315e-28	436	1082	116	0.107209	0.266055	GO:0036230	GO:BP	granulocyte activation	12863	11022	3.16291
38	2.58666e-28	462	1082	120	0.110906	0.25974	GO:0002275	GO:BP	myeloid cell activation involved in immune response	12863	945	3.08784
39	2.66787e-28	7172	1082	779	0.719963	0.108617	GO:0065007	GO:BP	biological regulation	12863	18770	1.29126
40	2.79753e-28	424	1082	114	0.10536	0.268868	GO:0002283	GO:BP	neutrophil activation involved in immune response	12863	953	3.19635
41	3.28609e-28	2683	1082	381	0.352126	0.142005	GO:0006950	GO:BP	response to stress	12863	2918	1.68818
42	3.87863e-28	432	1082	115	0.106285	0.266204	GO:0042119	GO:BP	neutrophil activation	12863	11630	3.16467
43	7.15246e-28	422	1082	113	0.104436	0.267773	GO:0043312	GO:BP	neutrophil degranulation	12863	12341	3.18333
44	1.01151e-27	430	1082	114	0.10536	0.265116	GO:0002446	GO:BP	neutrophil mediated immunity	12863	1116	3.15175
45	3.86825e-27	677	1082	149	0.137708	0.220089	GO:0006887	GO:BP	exocytosis	12863	2864	2.61645
46	7.70523e-27	823	1082	168	0.155268	0.204131	GO:0034097	GO:BP	response to cytokine	12863	9737	2.42675
47	8.78905e-27	756	1082	159	0.14695	0.210317	GO:0071345	GO:BP	cellular response to cytokine stimulus	12863	19541	2.50029
48	1.55387e-26	3488	1082	455	0.420518	0.130447	GO:0048519	GO:BP	negative regulation of biological process	12863	14969	1.55078
49	6.11901e-26	1027	1082	192	0.177449	0.186952	GO:0046903	GO:BP	secretion	12863	14563	2.22252
50	6.56518e-26	680	1082	147	0.13586	0.216176	GO:0002684	GO:BP	positive regulation of immune system process	12863	1353	2.56994
51	1.17109e-25	968	1082	184	0.170055	0.190083	GO:0032940	GO:BP	secretion by cell	12863	9200	2.25973
52	1.4127e-25	722	1082	152	0.140481	0.210526	GO:0098542	GO:BP	defense response to other organism	12863	22200	2.50277
53	3.06119e-25	3883	1082	488	0.451017	0.125676	GO:0048518	GO:BP	positive regulation of biological process	12863	14968	1.49406
54	4.07798e-25	994	1082	186	0.171904	0.187123	GO:0140352	GO:BP	export from cell	12863	23195	2.22455
55	1.75794e-24	1507	1082	245	0.226433	0.162575	GO:0016192	GO:BP	vesicle-mediated transport	12863	5792	1.93272
56	6.94184e-24	1783	1082	274	0.253235	0.153674	GO:0007166	GO:BP	cell surface receptor signaling pathway	12863	3101	1.8269
57	3.04109e-23	3570	1082	452	0.417745	0.126611	GO:0048522	GO:BP	positive regulation of cellular process	12863	14972	1.50517
58	4.22362e-22	2631	1082	357	0.329945	0.13569	GO:0048583	GO:BP	regulation of response to stimulus	12863	15023	1.6131
59	8.05879e-22	1463	1082	233	0.215342	0.159262	GO:0048584	GO:BP	positive regulation of response to stimulus	12863	15024	1.89333
60	2.59227e-21	6463	1082	699	0.646026	0.108154	GO:0050794	GO:BP	regulation of cellular process	12863	15462	1.28575
61	7.40601e-21	1424	1082	226	0.208872	0.158708	GO:0008219	GO:BP	cell death	12863	3595	1.88675
62	8.0468e-21	585	1082	124	0.114603	0.211966	GO:0006412	GO:BP	translation	12863	2436	2.51989
63	8.0468e-21	187	1082	63	0.0582255	0.336898	GO:0006413	GO:BP	translational initiation	12863	2437	4.00511
64	8.29688e-21	792	1082	151	0.139556	0.190657	GO:0016032	GO:BP	viral process	12863	5689	2.26656
65	8.29688e-21	527	1082	116	0.107209	0.220114	GO:0019221	GO:BP	cytokine-mediated signaling pathway	12863	6528	2.61675
66	2.49662e-20	600	1082	125	0.115527	0.208333	GO:0043043	GO:BP	peptide biosynthetic process	12863	12201	2.4767
67	5.62973e-20	823	1082	153	0.141405	0.185905	GO:0044403	GO:BP	symbiotic process	12863	12878	2.21007
68	7.1828e-20	691	1082	136	0.125693	0.196816	GO:0006518	GO:BP	peptide metabolic process	12863	2526	2.33978
69	7.40424e-20	99	1082	44	0.0406654	0.444444	GO:0006613	GO:BP	cotranslational protein targeting to membrane	12863	2619	5.28363
70	1.06769e-19	595	1082	123	0.113678	0.206723	GO:0045087	GO:BP	innate immune response	12863	13230	2.45755
71	1.27223e-19	634	1082	128	0.118299	0.201893	GO:0050776	GO:BP	regulation of immune response	12863	15450	2.40014
72	1.42077e-19	1341	1082	213	0.196858	0.158837	GO:0012501	GO:BP	programmed cell death	12863	5159	1.88828
73	7.78988e-19	95	1082	42	0.038817	0.442105	GO:0006614	GO:BP	SRP-dependent cotranslational protein targeting to membrane	12863	2620	5.25582
74	8.9308e-19	2070	1082	289	0.267098	0.139614	GO:0008104	GO:BP	protein localization	12863	3564	1.65975
75	1.19506e-18	1564	1082	235	0.21719	0.150256	GO:0015833	GO:BP	peptide transport	12863	5545	1.78627
76	1.20906e-18	1302	1082	206	0.190388	0.158218	GO:0006915	GO:BP	apoptotic process	12863	2889	1.88092
77	1.3096e-18	1547	1082	233	0.215342	0.150614	GO:0015031	GO:BP	protein transport	12863	5392	1.79053
78	6.21008e-18	1584	1082	235	0.21719	0.148359	GO:0042886	GO:BP	amide transport	12863	12117	1.76371
79	6.21856e-18	2543	1082	334	0.308688	0.131341	GO:0009893	GO:BP	positive regulation of metabolic process	12863	4254	1.5614
80	6.65664e-18	109	1082	44	0.0406654	0.40367	GO:0045047	GO:BP	protein targeting to ER	12863	13202	4.79889
81	7.7688e-18	134	1082	49	0.0452865	0.365672	GO:0070972	GO:BP	protein localization to endoplasmic reticulum	12863	19336	4.34717
82	8.41171e-18	2348	1082	314	0.290203	0.133731	GO:0010604	GO:BP	positive regulation of macromolecule metabolic process	12863	4791	1.58981
83	1.44352e-17	554	1082	113	0.104436	0.203971	GO:0001816	GO:BP	cytokine production	12863	600	2.42484
84	1.47758e-17	1614	1082	237	0.219039	0.14684	GO:0045184	GO:BP	establishment of protein localization	12863	13274	1.74566
85	1.62374e-17	121	1082	46	0.0425139	0.380165	GO:0000184	GO:BP	nuclear-transcribed mRNA catabolic process, nonsense-mediated decay	12863	79	4.51947
86	2.19776e-17	112	1082	44	0.0406654	0.392857	GO:0072599	GO:BP	establishment of protein localization to endoplasmic reticulum	12863	20550	4.67035
87	2.3475e-17	3089	1082	385	0.355823	0.124636	GO:0048523	GO:BP	negative regulation of cellular process	12863	14973	1.48169
88	6.13239e-17	1447	1082	217	0.200555	0.149965	GO:0046907	GO:BP	intracellular transport	12863	14564	1.78281
89	6.35474e-17	1822	1082	257	0.237523	0.141054	GO:0051239	GO:BP	regulation of multicellular organismal process	12863	15837	1.67687
90	6.80066e-17	173	1082	55	0.0508318	0.317919	GO:0006612	GO:BP	protein targeting to membrane	12863	2618	3.77948
91	8.22261e-17	1599	1082	233	0.215342	0.145716	GO:0032879	GO:BP	regulation of localization	12863	9149	1.7323
92	8.22354e-17	2294	1082	305	0.281885	0.132956	GO:0033036	GO:BP	macromolecule localization	12863	9271	1.5806
93	1.00719e-16	2387	1082	314	0.290203	0.131546	GO:0065008	GO:BP	regulation of biological quality	12863	18771	1.56384
94	1.23691e-16	703	1082	130	0.120148	0.184922	GO:0043604	GO:BP	amide biosynthetic process	12863	12533	2.19838
95	1.28273e-16	1756	1082	249	0.230129	0.1418	GO:0071705	GO:BP	nitrogen compound transport	12863	19851	1.68574
96	1.41139e-16	1458	1082	217	0.200555	0.148834	GO:0043933	GO:BP	protein-containing complex subunit organization	12863	12613	1.76936
97	1.78392e-16	424	1082	93	0.0859519	0.21934	GO:0098609	GO:BP	cell-cell adhesion	12863	22211	2.60755
98	2.12502e-16	1878	1082	261	0.24122	0.138978	GO:0051246	GO:BP	regulation of protein metabolic process	12863	15841	1.65219
99	2.58985e-16	3654	1082	434	0.401109	0.118774	GO:0044267	GO:BP	cellular protein metabolic process	12863	12808	1.412
100	3.00763e-16	1116	1082	178	0.16451	0.159498	GO:0010941	GO:BP	regulation of cell death	12863	5104	1.89614
101	3.63557e-16	4587	1082	518	0.478743	0.112928	GO:0019222	GO:BP	regulation of metabolic process	12863	6529	1.34251
102	6.7897e-16	1046	1082	169	0.156192	0.161568	GO:0051049	GO:BP	regulation of transport	12863	15680	1.92075
103	7.04411e-16	767	1082	136	0.125693	0.177314	GO:0016071	GO:BP	mRNA metabolic process	12863	5718	2.10794
104	7.14475e-16	3924	1082	457	0.422366	0.116463	GO:0019538	GO:BP	protein metabolic process	12863	6824	1.38453
105	7.70419e-16	500	1082	102	0.0942699	0.204	GO:0001817	GO:BP	regulation of cytokine production	12863	601	2.42519
106	7.79156e-16	2191	1082	291	0.268946	0.132816	GO:0009892	GO:BP	negative regulation of metabolic process	12863	4253	1.57894
107	7.98847e-16	4213	1082	483	0.446396	0.114645	GO:0060255	GO:BP	regulation of macromolecule metabolic process	12863	17183	1.36292
108	8.16336e-16	398	1082	88	0.0813309	0.221106	GO:0050865	GO:BP	regulation of cell activation	12863	15521	2.62854
109	9.31687e-16	1775	1082	248	0.229205	0.139718	GO:0032268	GO:BP	regulation of cellular protein metabolic process	12863	8707	1.661
110	1.19736e-15	1230	1082	189	0.174677	0.153659	GO:0065003	GO:BP	protein-containing complex assembly	12863	18767	1.82672
111	1.38198e-15	467	1082	97	0.0896488	0.207709	GO:0050778	GO:BP	positive regulation of immune response	12863	15452	2.46928
112	1.38198e-15	652	1082	121	0.11183	0.185583	GO:0030097	GO:BP	hemopoiesis	12863	7760	2.20624
113	1.75412e-15	670	1082	123	0.113678	0.183582	GO:0048534	GO:BP	hematopoietic or lymphoid organ development	12863	14982	2.18246
114	1.9379e-15	347	1082	80	0.0739372	0.230548	GO:0006402	GO:BP	mRNA catabolic process	12863	2427	2.74079
115	2.18059e-15	280	1082	70	0.064695	0.25	GO:0090150	GO:BP	establishment of protein localization to membrane	12863	21370	2.97204
116	2.33322e-15	713	1082	128	0.118299	0.179523	GO:0002520	GO:BP	immune system development	12863	1189	2.1342
117	3.42763e-15	2116	1082	281	0.259704	0.132798	GO:0051173	GO:BP	positive regulation of nitrogen compound metabolic process	12863	15782	1.57872
118	3.64082e-15	3513	1082	416	0.384473	0.118417	GO:0032502	GO:BP	developmental process	12863	8872	1.40777
119	5.78247e-15	1957	1082	264	0.243993	0.1349	GO:0071702	GO:BP	organic substance transport	12863	19848	1.60372
120	5.98048e-15	382	1082	84	0.077634	0.219895	GO:0006401	GO:BP	RNA catabolic process	12863	2426	2.61415
121	6.2414e-15	2027	1082	271	0.250462	0.133695	GO:0010605	GO:BP	negative regulation of macromolecule metabolic process	12863	4792	1.58939
122	6.51621e-15	3861	1082	447	0.413124	0.115773	GO:0032501	GO:BP	multicellular organismal process	12863	8871	1.37633
123	9.57259e-15	734	1082	129	0.119224	0.175749	GO:1901698	GO:BP	response to nitrogen compound	12863	24975	2.08934
124	1.05622e-14	1947	1082	262	0.242144	0.134566	GO:0065009	GO:BP	regulation of molecular function	12863	18772	1.59974
125	1.13254e-14	205	1082	57	0.0526802	0.278049	GO:0000956	GO:BP	nuclear-transcribed mRNA catabolic process	12863	338	3.30549
126	1.17496e-14	187	1082	54	0.0499076	0.28877	GO:0019080	GO:BP	viral gene expression	12863	6492	3.43295
127	1.41226e-14	4020	1082	460	0.425139	0.114428	GO:0010467	GO:BP	gene expression	12863	4689	1.36034
128	1.429e-14	345	1082	78	0.0720887	0.226087	GO:1903706	GO:BP	regulation of hemopoiesis	12863	26780	2.68776
129	1.45564e-14	3231	1082	387	0.357671	0.119777	GO:0010468	GO:BP	regulation of gene expression	12863	4690	1.42393
130	1.55701e-14	1038	1082	164	0.151571	0.157996	GO:0043067	GO:BP	regulation of programmed cell death	12863	12224	1.87829
131	1.57856e-14	1118	1082	173	0.159889	0.154741	GO:0008283	GO:BP	cell population proliferation	12863	3602	1.83958
132	1.82211e-14	375	1082	82	0.0757856	0.218667	GO:0002694	GO:BP	regulation of leukocyte activation	12863	1363	2.59955
133	3.26453e-14	235	1082	61	0.0563771	0.259574	GO:0007159	GO:BP	leukocyte cell-cell adhesion	12863	3094	3.08587
134	3.62402e-14	986	1082	157	0.145102	0.159229	GO:0006886	GO:BP	intracellular protein transport	12863	2863	1.89294
135	3.74568e-14	891	1082	146	0.134935	0.163861	GO:0043603	GO:BP	cellular amide metabolic process	12863	12532	1.94801
136	4.24006e-14	1023	1082	161	0.148799	0.15738	GO:0051240	GO:BP	positive regulation of multicellular organismal process	12863	15838	1.87096
137	4.32798e-14	1498	1082	213	0.196858	0.14219	GO:0010629	GO:BP	negative regulation of gene expression	12863	4815	1.69037
138	4.52547e-14	2249	1082	290	0.268022	0.128946	GO:0031325	GO:BP	positive regulation of cellular metabolic process	12863	8322	1.53293
139	8.54007e-14	697	1082	122	0.112754	0.175036	GO:0007155	GO:BP	cell adhesion	12863	3090	2.08086
140	1.05858e-13	699	1082	122	0.112754	0.174535	GO:0022610	GO:BP	biological adhesion	12863	7658	2.0749
141	1.09722e-13	484	1082	95	0.0878004	0.196281	GO:0034655	GO:BP	nucleobase-containing compound catabolic process	12863	10079	2.33342
142	1.36372e-13	1533	1082	215	0.198706	0.140248	GO:0050793	GO:BP	regulation of developmental process	12863	15461	1.66729
143	1.46873e-13	374	1082	80	0.0739372	0.213904	GO:0006605	GO:BP	protein targeting	12863	2611	2.54292
144	1.49946e-13	2159	1082	279	0.257856	0.129226	GO:0010646	GO:BP	regulation of cell communication	12863	4832	1.53627
145	1.57132e-13	3183	1082	378	0.349353	0.118756	GO:0048856	GO:BP	anatomical structure development	12863	15276	1.41179
146	1.67029e-13	687	1082	120	0.110906	0.174672	GO:0010243	GO:BP	response to organonitrogen compound	12863	4537	2.07654
147	1.99174e-13	7661	1082	763	0.705176	0.0995954	GO:0008152	GO:BP	metabolic process	12863	3566	1.18401
148	2.08077e-13	1024	1082	159	0.14695	0.155273	GO:0042981	GO:BP	regulation of apoptotic process	12863	12160	1.84592
149	2.08077e-13	2185	1082	281	0.259704	0.128604	GO:0023051	GO:BP	regulation of signaling	12863	7707	1.52887
150	2.13567e-13	1540	1082	215	0.198706	0.13961	GO:0070727	GO:BP	cellular macromolecule localization	12863	19186	1.65971
151	2.35479e-13	320	1082	72	0.0665434	0.225	GO:0002764	GO:BP	immune response-regulating signaling pathway	12863	1427	2.67484
152	2.37022e-13	498	1082	96	0.0887246	0.192771	GO:0046649	GO:BP	lymphocyte activation	12863	14387	2.2917
153	2.66422e-13	170	1082	49	0.0452865	0.288235	GO:0019083	GO:BP	viral transcription	12863	6495	3.42659
154	2.67831e-13	1153	1082	173	0.159889	0.150043	GO:0023056	GO:BP	positive regulation of signaling	12863	7712	1.78374
155	3.15668e-13	1146	1082	172	0.158965	0.150087	GO:0010647	GO:BP	positive regulation of cell communication	12863	4833	1.78426
156	3.22924e-13	4537	1082	500	0.462107	0.110205	GO:1901564	GO:BP	organonitrogen compound metabolic process	12863	24864	1.31014
157	3.43499e-13	2285	1082	290	0.268022	0.126915	GO:0048869	GO:BP	cellular developmental process	12863	15288	1.50878
158	3.58839e-13	1022	1082	158	0.146026	0.154599	GO:0080134	GO:BP	regulation of response to stress	12863	21076	1.8379
159	3.72554e-13	2226	1082	284	0.262477	0.127583	GO:0030154	GO:BP	cell differentiation	12863	7776	1.51673
160	4.36179e-13	936	1082	148	0.136784	0.15812	GO:0042127	GO:BP	regulation of cell population proliferation	12863	11636	1.87975
161	4.59052e-13	527	1082	99	0.0914972	0.187856	GO:1901361	GO:BP	organic cyclic compound catabolic process	12863	24677	2.23326
162	5.13424e-13	325	1082	72	0.0665434	0.221538	GO:0001819	GO:BP	positive regulation of cytokine production	12863	603	2.63369
163	5.17224e-13	318	1082	71	0.0656192	0.22327	GO:0002768	GO:BP	immune response-regulating cell surface receptor signaling pathway	12863	1431	2.65428
164	5.47857e-13	505	1082	96	0.0887246	0.190099	GO:0046700	GO:BP	heterocycle catabolic process	12863	14427	2.25993
165	7.18048e-13	515	1082	97	0.0896488	0.18835	GO:0019439	GO:BP	aromatic compound catabolic process	12863	6730	2.23913
166	7.69654e-13	1531	1082	212	0.195933	0.138472	GO:0034613	GO:BP	cellular protein localization	12863	10050	1.64617
167	7.9034e-13	508	1082	96	0.0887246	0.188976	GO:0044270	GO:BP	cellular nitrogen compound catabolic process	12863	12810	2.24658
168	9.32348e-13	266	1082	63	0.0582255	0.236842	GO:0022407	GO:BP	regulation of cell-cell adhesion	12863	7638	2.81562
169	1.01604e-12	2592	1082	318	0.2939	0.122685	GO:0048731	GO:BP	system development	12863	15159	1.4585
170	1.07126e-12	2885	1082	346	0.319778	0.119931	GO:0007275	GO:BP	multicellular organism development	12863	3201	1.42576
171	1.16017e-12	247	1082	60	0.0554529	0.242915	GO:0050867	GO:BP	positive regulation of cell activation	12863	15523	2.88781
172	1.42698e-12	1048	1082	159	0.14695	0.151718	GO:1901700	GO:BP	response to oxygen-containing compound	12863	24977	1.80364
173	1.78648e-12	1496	1082	207	0.191312	0.138369	GO:0010628	GO:BP	positive regulation of gene expression	12863	4814	1.64495
174	1.87124e-12	210	1082	54	0.0499076	0.257143	GO:1903037	GO:BP	regulation of leukocyte cell-cell adhesion	12863	26173	3.05696
175	1.87622e-12	1133	1082	168	0.155268	0.148279	GO:0051247	GO:BP	positive regulation of protein metabolic process	12863	15842	1.76276
176	2.27813e-12	278	1082	64	0.0591497	0.230216	GO:0002683	GO:BP	negative regulation of immune system process	12863	1352	2.73684
177	2.71312e-12	293	1082	66	0.0609982	0.225256	GO:0002429	GO:BP	immune response-activating cell surface receptor signaling pathway	12863	1099	2.67788
178	2.71312e-12	293	1082	66	0.0609982	0.225256	GO:0002757	GO:BP	immune response-activating signal transduction	12863	1420	2.67788
179	2.7263e-12	640	1082	111	0.102588	0.173437	GO:0032101	GO:BP	regulation of response to external stimulus	12863	8606	2.06185
180	3.04853e-12	315	1082	69	0.0637708	0.219048	GO:0051249	GO:BP	regulation of lymphocyte activation	12863	15844	2.60408
181	3.10848e-12	1049	1082	158	0.146026	0.15062	GO:0009967	GO:BP	positive regulation of signal transduction	12863	4308	1.79059
182	3.10848e-12	1067	1082	160	0.147874	0.149953	GO:0032270	GO:BP	positive regulation of cellular protein metabolic process	12863	8709	1.78267
183	3.89615e-12	331	1082	71	0.0656192	0.214502	GO:0042110	GO:BP	T cell activation	12863	11625	2.55003
184	3.90393e-12	1809	1082	238	0.219963	0.131564	GO:0035556	GO:BP	intracellular signal transduction	12863	10537	1.56406
185	3.91833e-12	1007	1082	153	0.141405	0.151936	GO:0040011	GO:BP	locomotion	12863	11538	1.80625
186	4.12427e-12	467	1082	89	0.0822551	0.190578	GO:0097190	GO:BP	apoptotic signaling pathway	12863	21904	2.26563
187	4.76756e-12	7244	1082	723	0.668207	0.0998067	GO:0044237	GO:BP	cellular metabolic process	12863	12789	1.18652
188	5.56916e-12	4213	1082	465	0.42976	0.110373	GO:0016043	GO:BP	cellular component organization	12863	5695	1.31213
189	5.66086e-12	1974	1082	254	0.23475	0.128673	GO:0009966	GO:BP	regulation of signal transduction	12863	4307	1.52968
190	6.1622e-12	959	1082	147	0.13586	0.153285	GO:0009719	GO:BP	response to endogenous stimulus	12863	4102	1.82227
191	6.31516e-12	2026	1082	259	0.239372	0.127838	GO:0022607	GO:BP	cellular component assembly	12863	7655	1.51976
192	7.16357e-12	6340	1082	648	0.598891	0.102208	GO:0043170	GO:BP	macromolecule metabolic process	12863	12284	1.21507
193	8.82981e-12	238	1082	57	0.0526802	0.239496	GO:0002696	GO:BP	positive regulation of leukocyte activation	12863	1365	2.84717
194	9.34354e-12	308	1082	67	0.0619224	0.217532	GO:0030099	GO:BP	myeloid cell differentiation	12863	7762	2.58606
195	9.78074e-12	4395	1082	480	0.443623	0.109215	GO:0071840	GO:BP	cellular component organization or biogenesis	12863	19926	1.29837
196	1.06084e-11	571	1082	101	0.0933457	0.176883	GO:0014070	GO:BP	response to organic cyclic compound	12863	5228	2.10281
197	1.54534e-11	431	1082	83	0.0767098	0.192575	GO:0030155	GO:BP	regulation of cell adhesion	12863	7777	2.28937
198	1.64432e-11	5579	1082	582	0.537893	0.10432	GO:0044260	GO:BP	cellular macromolecule metabolic process	12863	12804	1.24017
199	1.68561e-11	1071	1082	158	0.146026	0.147526	GO:0045595	GO:BP	regulation of cell differentiation	12863	13447	1.75381
200	1.80253e-11	848	1082	133	0.122921	0.15684	GO:0016477	GO:BP	cell migration	12863	5867	1.86454
201	2.37907e-11	336	1082	70	0.064695	0.208333	GO:0002253	GO:BP	activation of immune response	12863	923	2.4767
202	2.4628e-11	366	1082	74	0.0683919	0.202186	GO:0009617	GO:BP	response to bacterium	12863	4023	2.40362
203	3.34818e-11	445	1082	84	0.077634	0.188764	GO:0006954	GO:BP	inflammatory response	12863	2921	2.24406
204	3.80551e-11	3357	1082	383	0.353974	0.11409	GO:0044271	GO:BP	cellular nitrogen compound biosynthetic process	12863	12811	1.35632
205	5.22628e-11	764	1082	122	0.112754	0.159686	GO:0051094	GO:BP	positive regulation of developmental process	12863	15711	1.89837
206	5.54775e-11	521	1082	93	0.0859519	0.178503	GO:0010942	GO:BP	positive regulation of cell death	12863	5105	2.12207
207	8.03451e-11	223	1082	53	0.0489834	0.237668	GO:0050863	GO:BP	regulation of T cell activation	12863	15519	2.82544
208	8.63429e-11	1567	1082	208	0.192237	0.132738	GO:0050790	GO:BP	regulation of catalytic activity	12863	15459	1.57801
209	8.64844e-11	761	1082	121	0.11183	0.159001	GO:1901701	GO:BP	cellular response to oxygen-containing compound	12863	24978	1.89023
210	1.02044e-10	833	1082	129	0.119224	0.154862	GO:0034622	GO:BP	cellular protein-containing complex assembly	12863	10054	1.84103
211	1.072e-10	1170	1082	166	0.15342	0.14188	GO:2000026	GO:BP	regulation of multicellular organismal development	12863	29296	1.6867
212	1.17029e-10	1051	1082	153	0.141405	0.145576	GO:0048585	GO:BP	negative regulation of response to stimulus	12863	15025	1.73063
213	1.23127e-10	1006	1082	148	0.136784	0.147117	GO:0044265	GO:BP	cellular macromolecule catabolic process	12863	12807	1.74896
214	1.29561e-10	3956	1082	435	0.402033	0.10996	GO:0080090	GO:BP	regulation of primary metabolic process	12863	21057	1.30722
215	1.42126e-10	1325	1082	182	0.168207	0.137358	GO:1901566	GO:BP	organonitrogen compound biosynthetic process	12863	24866	1.63294
216	1.53872e-10	1166	1082	165	0.152495	0.141509	GO:0006928	GO:BP	movement of cell or subcellular component	12863	2900	1.68229
217	1.57956e-10	2259	1082	276	0.255083	0.122178	GO:0044085	GO:BP	cellular component biogenesis	12863	12728	1.45247
218	1.73284e-10	373	1082	73	0.0674677	0.19571	GO:0002521	GO:BP	leukocyte differentiation	12863	1190	2.32664
219	1.74364e-10	143	1082	40	0.0369686	0.27972	GO:0034341	GO:BP	response to interferon-gamma	12863	9922	3.32536
220	1.88956e-10	3449	1082	388	0.358595	0.112496	GO:0009059	GO:BP	macromolecule biosynthetic process	12863	3697	1.33738
221	2.1698e-10	923	1082	138	0.127542	0.149512	GO:0051674	GO:BP	localization of cell	12863	16170	1.77743
222	2.1698e-10	923	1082	138	0.127542	0.149512	GO:0048870	GO:BP	cell motility	12863	15289	1.77743
223	2.23453e-10	1228	1082	171	0.158041	0.139251	GO:0044093	GO:BP	positive regulation of molecular function	12863	12735	1.65544
224	2.2557e-10	584	1082	99	0.0914972	0.169521	GO:0051050	GO:BP	positive regulation of transport	12863	15681	2.01529
225	2.40892e-10	478	1082	86	0.0794824	0.179916	GO:0072657	GO:BP	protein localization to membrane	12863	20566	2.13888
226	2.82026e-10	3821	1082	421	0.389094	0.110181	GO:0051171	GO:BP	regulation of nitrogen compound metabolic process	12863	15780	1.30985
227	3.64909e-10	128	1082	37	0.0341959	0.289062	GO:0071346	GO:BP	cellular response to interferon-gamma	12863	19542	3.43642
228	4.05007e-10	4119	1082	447	0.413124	0.108521	GO:0031323	GO:BP	regulation of cellular metabolic process	12863	8320	1.29012
229	4.18501e-10	641	1082	105	0.0970425	0.163807	GO:1902533	GO:BP	positive regulation of intracellular signal transduction	12863	25736	1.94736
230	5.40538e-10	95	1082	31	0.0286506	0.326316	GO:0002181	GO:BP	cytoplasmic translation	12863	865	3.8793
231	5.91518e-10	161	1082	42	0.038817	0.26087	GO:1903039	GO:BP	positive regulation of leukocyte cell-cell adhesion	12863	26175	3.10126
232	6.73399e-10	463	1082	83	0.0767098	0.179266	GO:0031347	GO:BP	regulation of defense response	12863	8343	2.13114
233	7.55185e-10	546	1082	93	0.0859519	0.17033	GO:0033993	GO:BP	response to lipid	12863	9700	2.02491
234	8.06192e-10	555	1082	94	0.0868762	0.169369	GO:0009725	GO:BP	response to hormone	12863	4108	2.01349
235	8.22598e-10	209	1082	49	0.0452865	0.23445	GO:0051251	GO:BP	positive regulation of lymphocyte activation	12863	15846	2.78718
236	1.11389e-09	492	1082	86	0.0794824	0.174797	GO:0072594	GO:BP	establishment of protein localization to organelle	12863	20545	2.07801
237	1.32061e-09	1151	1082	160	0.147874	0.13901	GO:0009057	GO:BP	macromolecule catabolic process	12863	3695	1.65257
238	1.38837e-09	146	1082	39	0.0360444	0.267123	GO:0050870	GO:BP	positive regulation of T cell activation	12863	15526	3.17561
239	1.38837e-09	3367	1082	376	0.347505	0.111672	GO:0034645	GO:BP	cellular macromolecule biosynthetic process	12863	10073	1.32758
240	1.47969e-09	446	1082	80	0.0739372	0.179372	GO:1901699	GO:BP	cellular response to nitrogen compound	12863	24976	2.13241
241	1.47969e-09	804	1082	122	0.112754	0.151741	GO:0033365	GO:BP	protein localization to organelle	12863	9468	1.80393
242	1.69507e-09	368	1082	70	0.064695	0.190217	GO:0034248	GO:BP	regulation of cellular amide metabolic process	12863	9864	2.26134
243	1.69853e-09	1629	1082	209	0.193161	0.1283	GO:0016310	GO:BP	phosphorylation	12863	5827	1.52525
244	1.93095e-09	180	1082	44	0.0406654	0.244444	GO:0022409	GO:BP	positive regulation of cell-cell adhesion	12863	7640	2.906
245	2.03353e-09	331	1082	65	0.0600739	0.196375	GO:0043254	GO:BP	regulation of protein-containing complex assembly	12863	12307	2.33453
246	2.06111e-09	409	1082	75	0.0693161	0.183374	GO:0071417	GO:BP	cellular response to organonitrogen compound	12863	19613	2.17998
247	2.13718e-09	482	1082	84	0.077634	0.174274	GO:0043068	GO:BP	positive regulation of programmed cell death	12863	12225	2.0718
248	2.54714e-09	1907	1082	236	0.218115	0.123755	GO:0048513	GO:BP	animal organ development	12863	14963	1.47122
249	2.75734e-09	812	1082	122	0.112754	0.150246	GO:0071495	GO:BP	cellular response to endogenous stimulus	12863	19683	1.78615
250	2.79046e-09	143	1082	38	0.0351201	0.265734	GO:1903708	GO:BP	positive regulation of hemopoiesis	12863	26782	3.15909
251	4.32731e-09	564	1082	93	0.0859519	0.164894	GO:0045597	GO:BP	positive regulation of cell differentiation	12863	13449	1.96028
252	4.34474e-09	171	1082	42	0.038817	0.245614	GO:0045637	GO:BP	regulation of myeloid cell differentiation	12863	13489	2.9199
253	4.37992e-09	284	1082	58	0.0536044	0.204225	GO:0050900	GO:BP	leukocyte migration	12863	15550	2.42787
254	4.56662e-09	322	1082	63	0.0582255	0.195652	GO:0006417	GO:BP	regulation of translation	12863	2440	2.32595
255	5.39293e-09	635	1082	101	0.0933457	0.159055	GO:0060548	GO:BP	negative regulation of cell death	12863	17465	1.89087
256	5.69666e-09	653	1082	103	0.0951941	0.157734	GO:0061024	GO:BP	membrane organization	12863	17920	1.87516
257	6.93526e-09	833	1082	123	0.113678	0.147659	GO:0009628	GO:BP	response to abiotic stimulus	12863	4031	1.7554
258	7.00594e-09	477	1082	82	0.0757856	0.171908	GO:0043065	GO:BP	positive regulation of apoptotic process	12863	12222	2.04367
259	7.41568e-09	7255	1082	707	0.65342	0.09745	GO:0071704	GO:BP	organic substance metabolic process	12863	19850	1.1585
260	1.04877e-08	6644	1082	656	0.606285	0.0987357	GO:0006807	GO:BP	nitrogen compound metabolic process	12863	2797	1.17379
261	1.23607e-08	662	1082	103	0.0951941	0.155589	GO:0051241	GO:BP	negative regulation of multicellular organismal process	12863	15839	1.84967
262	1.7304e-08	579	1082	93	0.0859519	0.160622	GO:0006812	GO:BP	cation transport	12863	2802	1.9095
263	1.7478e-08	882	1082	127	0.117375	0.143991	GO:0010648	GO:BP	negative regulation of cell communication	12863	4834	1.71179
264	1.7478e-08	528	1082	87	0.0804067	0.164773	GO:0010608	GO:BP	posttranscriptional regulation of gene expression	12863	4795	1.95885
265	1.87426e-08	883	1082	127	0.117375	0.143828	GO:0023057	GO:BP	negative regulation of signaling	12863	7713	1.70985
266	2.0024e-08	1223	1082	163	0.150647	0.133279	GO:1902531	GO:BP	regulation of intracellular signal transduction	12863	25734	1.58444
267	2.0024e-08	146	1082	37	0.0341959	0.253425	GO:0002573	GO:BP	myeloid leukocyte differentiation	12863	1242	3.01276
268	2.19694e-08	767	1082	114	0.10536	0.148631	GO:0051248	GO:BP	negative regulation of protein metabolic process	12863	15843	1.76695
269	2.57359e-08	75	1082	25	0.0231054	0.333333	GO:0060333	GO:BP	interferon-gamma-mediated signaling pathway	12863	17259	3.96272
270	2.57359e-08	328	1082	62	0.0573013	0.189024	GO:0042330	GO:BP	taxis	12863	11759	2.24715
271	2.65049e-08	482	1082	81	0.0748614	0.16805	GO:0030029	GO:BP	actin filament-based process	12863	7735	1.9978
272	2.86165e-08	298	1082	58	0.0536044	0.194631	GO:0051090	GO:BP	regulation of DNA-binding transcription factor activity	12863	15707	2.3138
273	3.1182e-08	6945	1082	678	0.626617	0.0976242	GO:0044238	GO:BP	primary metabolic process	12863	12790	1.16057
274	3.15288e-08	129	1082	34	0.0314233	0.263566	GO:0042742	GO:BP	defense response to bacterium	12863	12014	3.13332
275	3.21858e-08	196	1082	44	0.0406654	0.22449	GO:1902105	GO:BP	regulation of leukocyte differentiation	12863	25367	2.66877
276	3.39751e-08	354	1082	65	0.0600739	0.183616	GO:0010035	GO:BP	response to inorganic substance	12863	4350	2.18286
277	3.79171e-08	1598	1082	200	0.184843	0.125156	GO:0051172	GO:BP	negative regulation of nitrogen compound metabolic process	12863	15781	1.48788
278	4.16617e-08	470	1082	79	0.0730129	0.168085	GO:0090087	GO:BP	regulation of peptide transport	12863	21312	1.99822
279	4.2882e-08	581	1082	92	0.0850277	0.158348	GO:0043069	GO:BP	negative regulation of programmed cell death	12863	12226	1.88246
280	4.35597e-08	1772	1082	217	0.200555	0.12246	GO:0044248	GO:BP	cellular catabolic process	12863	12796	1.45583
281	4.78054e-08	365	1082	66	0.0609982	0.180822	GO:0071407	GO:BP	cellular response to organic cyclic compound	12863	19603	2.14964
282	4.87234e-08	455	1082	77	0.0711645	0.169231	GO:0051223	GO:BP	regulation of protein transport	12863	15824	2.01184
283	5.35427e-08	250	1082	51	0.0471349	0.204	GO:0032970	GO:BP	regulation of actin filament-based process	12863	9227	2.42519
284	6.98064e-08	1352	1082	174	0.160813	0.128698	GO:0009891	GO:BP	positive regulation of biosynthetic process	12863	4252	1.52999
285	7.06984e-08	267	1082	53	0.0489834	0.198502	GO:0052547	GO:BP	regulation of peptidase activity	12863	16808	2.35982
286	7.772e-08	1999	1082	238	0.219963	0.11906	GO:0009056	GO:BP	catabolic process	12863	3694	1.4154
287	7.94867e-08	597	1082	93	0.0859519	0.155779	GO:0051270	GO:BP	regulation of cellular component movement	12863	15859	1.85193
288	8.06179e-08	253	1082	51	0.0471349	0.201581	GO:0052548	GO:BP	regulation of endopeptidase activity	12863	16809	2.39643
289	8.06179e-08	477	1082	79	0.0730129	0.165618	GO:0070201	GO:BP	regulation of establishment of protein localization	12863	18871	1.9689
290	8.72822e-08	841	1082	120	0.110906	0.142687	GO:0006811	GO:BP	ion transport	12863	2801	1.69629
291	8.9962e-08	732	1082	108	0.0998152	0.147541	GO:0032269	GO:BP	negative regulation of cellular protein metabolic process	12863	8708	1.75399
292	9.08797e-08	331	1082	61	0.0563771	0.18429	GO:0032103	GO:BP	positive regulation of response to external stimulus	12863	8608	2.19087
293	9.13918e-08	1737	1082	212	0.195933	0.12205	GO:0031324	GO:BP	negative regulation of cellular metabolic process	12863	8321	1.45095
294	1.07453e-07	1599	1082	198	0.182994	0.123827	GO:0051128	GO:BP	regulation of cellular component organization	12863	15738	1.47208
295	1.07453e-07	1003	1082	137	0.126617	0.13659	GO:0043085	GO:BP	positive regulation of catalytic activity	12863	12229	1.62381
296	1.10291e-07	672	1082	101	0.0933457	0.150298	GO:0032880	GO:BP	regulation of protein localization	12863	9150	1.78676
297	1.10291e-07	4130	1082	434	0.401109	0.105085	GO:0044249	GO:BP	cellular biosynthetic process	12863	12797	1.24927
298	1.13492e-07	1332	1082	171	0.158041	0.128378	GO:0031328	GO:BP	positive regulation of cellular biosynthetic process	12863	8325	1.52618
299	1.14846e-07	110	1082	30	0.0277264	0.272727	GO:1902107	GO:BP	positive regulation of leukocyte differentiation	12863	25369	3.24223
300	1.16091e-07	406	1082	70	0.064695	0.172414	GO:0032870	GO:BP	cellular response to hormone stimulus	12863	9140	2.04968
301	1.25091e-07	326	1082	60	0.0554529	0.184049	GO:0006935	GO:BP	chemotaxis	12863	2907	2.18801
302	1.35125e-07	170	1082	39	0.0360444	0.229412	GO:0060326	GO:BP	cell chemotaxis	12863	17252	2.72729
303	1.42551e-07	265	1082	52	0.0480591	0.196226	GO:0045785	GO:BP	positive regulation of cell adhesion	12863	13631	2.33277
304	1.49562e-07	570	1082	89	0.0822551	0.15614	GO:0043066	GO:BP	negative regulation of apoptotic process	12863	12223	1.85622
305	1.69869e-07	274	1082	53	0.0489834	0.193431	GO:0051222	GO:BP	positive regulation of protein transport	12863	15823	2.29954
306	2.35212e-07	828	1082	117	0.108133	0.141304	GO:0009968	GO:BP	negative regulation of signal transduction	12863	4309	1.67985
307	2.53817e-07	195	1082	42	0.038817	0.215385	GO:0031334	GO:BP	positive regulation of protein-containing complex assembly	12863	8330	2.56053
308	2.56033e-07	133	1082	33	0.0304991	0.24812	GO:0030041	GO:BP	actin filament polymerization	12863	7745	2.9497
309	2.7561e-07	1270	1082	163	0.150647	0.128346	GO:0010557	GO:BP	positive regulation of macromolecule biosynthetic process	12863	4749	1.5258
310	2.7561e-07	525	1082	83	0.0767098	0.158095	GO:0030334	GO:BP	regulation of cell migration	12863	7873	1.87946
311	2.84001e-07	4522	1082	466	0.430684	0.103052	GO:0034641	GO:BP	cellular nitrogen compound metabolic process	12863	10069	1.2251
312	2.84641e-07	240	1082	48	0.0443623	0.2	GO:0015672	GO:BP	monovalent inorganic cation transport	12863	5399	2.37763
313	2.94052e-07	1610	1082	197	0.18207	0.12236	GO:0033554	GO:BP	cellular response to stress	12863	9586	1.45464
314	3.07691e-07	570	1082	88	0.0813309	0.154386	GO:0040012	GO:BP	regulation of locomotion	12863	11539	1.83537
315	3.24961e-07	1195	1082	155	0.143253	0.129707	GO:0042592	GO:BP	homeostatic process	12863	11925	1.54198
316	3.30794e-07	4198	1082	437	0.403882	0.104097	GO:1901576	GO:BP	organic substance biosynthetic process	12863	24875	1.23753
317	3.38584e-07	311	1082	57	0.0526802	0.18328	GO:0002831	GO:BP	regulation of response to biotic stimulus	12863	1493	2.17886
318	3.87083e-07	435	1082	72	0.0665434	0.165517	GO:0097435	GO:BP	supramolecular fiber organization	12863	22048	1.9677
319	3.88211e-07	273	1082	52	0.0480591	0.190476	GO:0051051	GO:BP	negative regulation of transport	12863	15682	2.26441
320	3.98645e-07	4238	1082	440	0.406654	0.103823	GO:0009058	GO:BP	biosynthetic process	12863	3696	1.23426
321	3.98645e-07	1647	1082	200	0.184843	0.121433	GO:1901575	GO:BP	organic substance catabolic process	12863	24874	1.44362
322	4.03589e-07	258	1082	50	0.0462107	0.193798	GO:0009615	GO:BP	response to virus	12863	4021	2.30391
323	4.03589e-07	289	1082	54	0.0499076	0.186851	GO:1904951	GO:BP	positive regulation of establishment of protein localization	12863	27913	2.22132
324	4.03589e-07	2247	1082	258	0.238447	0.11482	GO:0006796	GO:BP	phosphate-containing compound metabolic process	12863	2786	1.365
325	4.61174e-07	143	1082	34	0.0314233	0.237762	GO:0032944	GO:BP	regulation of mononuclear cell proliferation	12863	9203	2.82656
326	4.61174e-07	143	1082	34	0.0314233	0.237762	GO:0050670	GO:BP	regulation of lymphocyte proliferation	12863	15387	2.82656
327	4.61174e-07	346	1082	61	0.0563771	0.176301	GO:1901652	GO:BP	response to peptide	12863	24939	2.09589
328	4.75378e-07	229	1082	46	0.0425139	0.200873	GO:0006909	GO:BP	phagocytosis	12863	2883	2.38802
329	4.7773e-07	665	1082	98	0.090573	0.147368	GO:0044087	GO:BP	regulation of cellular component biogenesis	12863	12729	1.75194
330	4.92912e-07	3242	1082	350	0.323475	0.107958	GO:0016070	GO:BP	RNA metabolic process	12863	5717	1.28342
331	5.25447e-07	577	1082	88	0.0813309	0.152513	GO:0019725	GO:BP	cellular homeostasis	12863	6990	1.8131
332	5.33846e-07	372	1082	64	0.0591497	0.172043	GO:0009611	GO:BP	response to wounding	12863	4018	2.04528
333	5.36438e-07	1244	1082	159	0.14695	0.127814	GO:0006468	GO:BP	protein phosphorylation	12863	2480	1.51947
334	5.45335e-07	676	1082	99	0.0914972	0.14645	GO:0010562	GO:BP	positive regulation of phosphorus metabolic process	12863	4754	1.74102
335	5.45335e-07	676	1082	99	0.0914972	0.14645	GO:0045937	GO:BP	positive regulation of phosphate metabolic process	12863	13767	1.74102
336	5.67988e-07	172	1082	38	0.0351201	0.22093	GO:0038093	GO:BP	Fc receptor signaling pathway	12863	11254	2.62646
337	5.73819e-07	2267	1082	259	0.239372	0.114248	GO:0006793	GO:BP	phosphorus metabolic process	12863	2783	1.3582
338	5.79702e-07	552	1082	85	0.0785582	0.153986	GO:2000145	GO:BP	regulation of cell motility	12863	29415	1.83061
339	5.81021e-07	373	1082	64	0.0591497	0.171582	GO:0071396	GO:BP	cellular response to lipid	12863	19592	2.03979
340	5.91514e-07	500	1082	79	0.0730129	0.158	GO:0008284	GO:BP	positive regulation of cell population proliferation	12863	3603	1.87833
341	6.00486e-07	277	1082	52	0.0480591	0.187726	GO:0007015	GO:BP	actin filament organization	12863	2970	2.23171
342	6.00486e-07	277	1082	52	0.0480591	0.187726	GO:0070482	GO:BP	response to oxygen levels	12863	19044	2.23171
343	6.21222e-07	187	1082	40	0.0369686	0.213904	GO:0046651	GO:BP	lymphocyte proliferation	12863	14388	2.54292
344	6.21222e-07	187	1082	40	0.0369686	0.213904	GO:0032943	GO:BP	mononuclear cell proliferation	12863	9202	2.54292
345	6.21222e-07	187	1082	40	0.0369686	0.213904	GO:0072593	GO:BP	reactive oxygen species metabolic process	12863	20544	2.54292
346	6.57336e-07	1447	1082	179	0.165434	0.123704	GO:0009653	GO:BP	anatomical structure morphogenesis	12863	4056	1.47062
347	6.57336e-07	159	1082	36	0.0332717	0.226415	GO:0032271	GO:BP	regulation of protein polymerization	12863	8710	2.69166
348	7.70424e-07	153	1082	35	0.0323475	0.228758	GO:0008154	GO:BP	actin polymerization or depolymerization	12863	3568	2.71952
349	9.6436e-07	212	1082	43	0.0397412	0.20283	GO:0051258	GO:BP	protein polymerization	12863	15853	2.41128
350	9.70809e-07	114	1082	29	0.0268022	0.254386	GO:1903555	GO:BP	regulation of tumor necrosis factor superfamily cytokine production	12863	26633	3.02418
351	1.03279e-06	1149	1082	148	0.136784	0.128808	GO:0019220	GO:BP	regulation of phosphate metabolic process	12863	6527	1.53129
352	1.04059e-06	346	1082	60	0.0554529	0.17341	GO:0060627	GO:BP	regulation of vesicle-mediated transport	12863	17537	2.06153
353	1.08622e-06	1150	1082	148	0.136784	0.128696	GO:0051174	GO:BP	regulation of phosphorus metabolic process	12863	15783	1.52996
354	1.09144e-06	306	1082	55	0.0508318	0.179739	GO:0042060	GO:BP	wound healing	12863	11594	2.13676
355	1.11569e-06	872	1082	119	0.109982	0.136468	GO:0007267	GO:BP	cell-cell signaling	12863	3193	1.62235
356	1.13153e-06	128	1082	31	0.0286506	0.242188	GO:0050866	GO:BP	negative regulation of cell activation	12863	15522	2.87917
357	1.1561e-06	1220	1082	155	0.143253	0.127049	GO:0031399	GO:BP	regulation of protein modification process	12863	8362	1.51038
358	1.1561e-06	206	1082	42	0.038817	0.203883	GO:0048545	GO:BP	response to steroid hormone	12863	14993	2.4238
359	1.16721e-06	987	1082	131	0.121072	0.132725	GO:0009888	GO:BP	tissue development	12863	4249	1.57786
360	1.19922e-06	291	1082	53	0.0489834	0.182131	GO:0002697	GO:BP	regulation of immune effector process	12863	1366	2.1652
361	1.24374e-06	562	1082	85	0.0785582	0.151246	GO:0023014	GO:BP	signal transduction by protein phosphorylation	12863	7683	1.79803
362	1.27882e-06	716	1082	102	0.0942699	0.142458	GO:0044092	GO:BP	negative regulation of molecular function	12863	12734	1.69357
363	1.33846e-06	245	1082	47	0.0434381	0.191837	GO:0001666	GO:BP	response to hypoxia	12863	502	2.28059
364	1.43577e-06	555	1082	84	0.077634	0.151351	GO:0000165	GO:BP	MAPK cascade	12863	72	1.79929
365	1.47778e-06	97	1082	26	0.0240296	0.268041	GO:0051250	GO:BP	negative regulation of lymphocyte activation	12863	15845	3.18652
366	1.56021e-06	110	1082	28	0.025878	0.254545	GO:0022904	GO:BP	respiratory electron transport chain	12863	7672	3.02608
367	1.67421e-06	137	1082	32	0.0295749	0.233577	GO:0030595	GO:BP	leukocyte chemotaxis	12863	7979	2.7768
368	1.7054e-06	117	1082	29	0.0268022	0.247863	GO:0030833	GO:BP	regulation of actin filament polymerization	12863	8068	2.94664
369	1.7054e-06	117	1082	29	0.0268022	0.247863	GO:0002695	GO:BP	negative regulation of leukocyte activation	12863	1364	2.94664
370	1.71503e-06	151	1082	34	0.0314233	0.225166	GO:0070663	GO:BP	regulation of leukocyte proliferation	12863	19154	2.67681
371	1.97852e-06	256	1082	48	0.0443623	0.1875	GO:0036293	GO:BP	response to decreased oxygen levels	12863	11071	2.22903
372	1.98025e-06	138	1082	32	0.0295749	0.231884	GO:0034250	GO:BP	positive regulation of cellular amide metabolic process	12863	9866	2.75668
373	2.00971e-06	264	1082	49	0.0452865	0.185606	GO:1901653	GO:BP	cellular response to peptide	12863	24940	2.20652
374	2.05165e-06	854	1082	116	0.107209	0.135831	GO:0055085	GO:BP	transmembrane transport	12863	16937	1.61479
375	2.08235e-06	2676	1082	294	0.271719	0.109865	GO:0010556	GO:BP	regulation of macromolecule biosynthetic process	12863	4748	1.3061
376	2.15528e-06	249	1082	47	0.0434381	0.188755	GO:0031349	GO:BP	positive regulation of defense response	12863	8345	2.24395
377	2.25066e-06	633	1082	92	0.0850277	0.14534	GO:0042327	GO:BP	positive regulation of phosphorylation	12863	11758	1.72782
378	2.2538e-06	37	1082	15	0.0138632	0.405405	GO:0002763	GO:BP	positive regulation of myeloid leukocyte differentiation	12863	1426	4.81953
379	2.27934e-06	112	1082	28	0.025878	0.25	GO:0032680	GO:BP	regulation of tumor necrosis factor production	12863	8993	2.97204
380	2.46276e-06	119	1082	29	0.0268022	0.243697	GO:0071706	GO:BP	tumor necrosis factor superfamily cytokine production	12863	19852	2.89712
381	2.51727e-06	106	1082	27	0.0249538	0.254717	GO:1902600	GO:BP	proton transmembrane transport	12863	25784	3.02812
382	2.51727e-06	197	1082	40	0.0369686	0.203046	GO:0019882	GO:BP	antigen processing and presentation	12863	7050	2.41384
383	2.51727e-06	197	1082	40	0.0369686	0.203046	GO:0050851	GO:BP	antigen receptor-mediated signaling pathway	12863	15507	2.41384
384	2.58128e-06	126	1082	30	0.0277264	0.238095	GO:0010466	GO:BP	negative regulation of peptidase activity	12863	4688	2.83052
385	2.61716e-06	168	1082	36	0.0332717	0.214286	GO:0007162	GO:BP	negative regulation of cell adhesion	12863	3097	2.54747
386	2.63844e-06	331	1082	57	0.0526802	0.172205	GO:0040017	GO:BP	positive regulation of locomotion	12863	11544	2.04721
387	2.73703e-06	493	1082	76	0.0702403	0.154158	GO:0007005	GO:BP	mitochondrion organization	12863	2962	1.83266
388	2.867e-06	198	1082	40	0.0369686	0.20202	GO:0070661	GO:BP	leukocyte proliferation	12863	19152	2.40165
389	2.91621e-06	94	1082	25	0.0231054	0.265957	GO:0042773	GO:BP	ATP synthesis coupled electron transport	12863	12039	3.16175
390	2.94724e-06	244	1082	46	0.0425139	0.188525	GO:1902903	GO:BP	regulation of supramolecular fiber organization	12863	26049	2.24121
391	3.10813e-06	70	1082	21	0.0194085	0.3	GO:0045639	GO:BP	positive regulation of myeloid cell differentiation	12863	13491	3.56645
392	3.33689e-06	2831	1082	307	0.283734	0.108442	GO:0009889	GO:BP	regulation of biosynthetic process	12863	4250	1.28918
393	3.35682e-06	177	1082	37	0.0341959	0.20904	GO:2000116	GO:BP	regulation of cysteine-type endopeptidase activity	12863	29386	2.4851
394	3.46518e-06	293	1082	52	0.0480591	0.177474	GO:1903311	GO:BP	regulation of mRNA metabolic process	12863	26402	2.10985
395	3.4866e-06	170	1082	36	0.0332717	0.211765	GO:0071216	GO:BP	cellular response to biotic stimulus	12863	19418	2.51749
396	3.6008e-06	163	1082	35	0.0323475	0.214724	GO:0043281	GO:BP	regulation of cysteine-type endopeptidase activity involved in apoptotic process	12863	12321	2.55267
397	3.6032e-06	326	1082	56	0.051756	0.171779	GO:2000147	GO:BP	positive regulation of cell motility	12863	29417	2.04214
398	3.60508e-06	883	1082	118	0.109057	0.133635	GO:0001932	GO:BP	regulation of protein phosphorylation	12863	677	1.58868
399	3.66609e-06	156	1082	34	0.0314233	0.217949	GO:0002699	GO:BP	positive regulation of immune effector process	12863	1368	2.59101
400	3.67497e-06	770	1082	106	0.0979667	0.137662	GO:0031401	GO:BP	positive regulation of protein modification process	12863	8364	1.63655
401	3.86072e-06	335	1082	57	0.0526802	0.170149	GO:0051272	GO:BP	positive regulation of cellular component movement	12863	15861	2.02276
402	3.90998e-06	115	1082	28	0.025878	0.243478	GO:0045727	GO:BP	positive regulation of translation	12863	13575	2.89451
403	3.90998e-06	454	1082	71	0.0656192	0.156388	GO:0055082	GO:BP	cellular chemical homeostasis	12863	16935	1.85916
404	4.22358e-06	588	1082	86	0.0794824	0.146259	GO:0001934	GO:BP	positive regulation of protein phosphorylation	12863	679	1.73875
405	4.25016e-06	129	1082	30	0.0277264	0.232558	GO:0030832	GO:BP	regulation of actin filament length	12863	8067	2.76469
406	4.25016e-06	129	1082	30	0.0277264	0.232558	GO:0008064	GO:BP	regulation of actin polymerization or depolymerization	12863	3553	2.76469
407	4.26492e-06	2763	1082	300	0.277264	0.108578	GO:0031326	GO:BP	regulation of cellular biosynthetic process	12863	8323	1.29079
408	4.36427e-06	634	1082	91	0.0841035	0.143533	GO:0022603	GO:BP	regulation of anatomical structure morphogenesis	12863	7651	1.70635
409	4.40627e-06	34	1082	14	0.012939	0.411765	GO:0002183	GO:BP	cytoplasmic translational initiation	12863	867	4.89513
410	4.40855e-06	320	1082	55	0.0508318	0.171875	GO:0043269	GO:BP	regulation of ion transport	12863	12312	2.04328
411	4.49373e-06	240	1082	45	0.0415896	0.1875	GO:0097193	GO:BP	intrinsic apoptotic signaling pathway	12863	21907	2.22903
412	4.63467e-06	116	1082	28	0.025878	0.241379	GO:0032640	GO:BP	tumor necrosis factor production	12863	8953	2.86956
413	4.97319e-06	313	1082	54	0.0499076	0.172524	GO:2001233	GO:BP	regulation of apoptotic signaling pathway	12863	30446	2.05099
414	5.15408e-06	591	1082	86	0.0794824	0.145516	GO:0007167	GO:BP	enzyme linked receptor protein signaling pathway	12863	3102	1.72992
415	5.15408e-06	1015	1082	131	0.121072	0.129064	GO:0042325	GO:BP	regulation of phosphorylation	12863	11756	1.53434
416	5.35908e-06	322	1082	55	0.0508318	0.170807	GO:0030335	GO:BP	positive regulation of cell migration	12863	7874	2.03059
417	5.53029e-06	441	1082	69	0.0637708	0.156463	GO:0030036	GO:BP	actin cytoskeleton organization	12863	7742	1.86005
418	5.67447e-06	298	1082	52	0.0480591	0.174497	GO:0002250	GO:BP	adaptive immune response	12863	920	2.07445
419	5.75348e-06	124	1082	29	0.0268022	0.233871	GO:0010951	GO:BP	negative regulation of endopeptidase activity	12863	5112	2.7803
420	6.1684e-06	425	1082	67	0.0619224	0.157647	GO:0030001	GO:BP	metal ion transport	12863	7725	1.87414
421	6.44323e-06	98	1082	25	0.0231054	0.255102	GO:0032273	GO:BP	positive regulation of protein polymerization	12863	8712	3.0327
422	6.76226e-06	153	1082	33	0.0304991	0.215686	GO:0022900	GO:BP	electron transport chain	12863	7671	2.56412
423	7.25633e-06	260	1082	47	0.0434381	0.180769	GO:0046034	GO:BP	ATP metabolic process	12863	13856	2.14902
424	8.12797e-06	74	1082	21	0.0194085	0.283784	GO:0051384	GO:BP	response to glucocorticoid	12863	15952	3.37367
425	8.47629e-06	335	1082	56	0.051756	0.167164	GO:0006979	GO:BP	response to oxidative stress	12863	2942	1.98728
426	8.65431e-06	93	1082	24	0.0221811	0.258065	GO:0042775	GO:BP	mitochondrial ATP synthesis coupled electron transport	12863	12041	3.06791
427	1.00597e-05	2931	1082	313	0.289279	0.106789	GO:0006996	GO:BP	organelle organization	12863	2954	1.26953
428	1.01583e-05	208	1082	40	0.0369686	0.192308	GO:0032102	GO:BP	negative regulation of response to external stimulus	12863	8607	2.28619
429	1.01969e-05	431	1082	67	0.0619224	0.155452	GO:0007169	GO:BP	transmembrane receptor protein tyrosine kinase signaling pathway	12863	3104	1.84804
430	1.10067e-05	149	1082	32	0.0295749	0.214765	GO:0002703	GO:BP	regulation of leukocyte mediated immunity	12863	1372	2.55316
431	1.10067e-05	201	1082	39	0.0360444	0.19403	GO:0051607	GO:BP	defense response to virus	12863	16109	2.30666
432	1.13821e-05	135	1082	30	0.0277264	0.222222	GO:0006119	GO:BP	oxidative phosphorylation	12863	2175	2.64182
433	1.22347e-05	696	1082	96	0.0887246	0.137931	GO:0051338	GO:BP	regulation of transferase activity	12863	15918	1.63975
434	1.27398e-05	399	1082	63	0.0582255	0.157895	GO:0008285	GO:BP	negative regulation of cell population proliferation	12863	3604	1.87708
435	1.29707e-05	669	1082	93	0.0859519	0.139013	GO:0060341	GO:BP	regulation of cellular localization	12863	17267	1.65262
436	1.36317e-05	226	1082	42	0.038817	0.185841	GO:0002237	GO:BP	response to molecule of bacterial origin	12863	908	2.20931
437	1.37293e-05	180	1082	36	0.0332717	0.2	GO:0022618	GO:BP	ribonucleoprotein complex assembly	12863	7666	2.37763
438	1.41532e-05	89	1082	23	0.0212569	0.258427	GO:0048024	GO:BP	regulation of mRNA splicing, via spliceosome	12863	14622	3.07222
439	1.41614e-05	37	1082	14	0.012939	0.378378	GO:0048489	GO:BP	synaptic vesicle transport	12863	14947	4.49823
440	1.45213e-05	392	1082	62	0.0573013	0.158163	GO:0051046	GO:BP	regulation of secretion	12863	15677	1.88027
441	1.47159e-05	803	1082	107	0.0988909	0.13325	GO:0051130	GO:BP	positive regulation of cellular component organization	12863	15740	1.5841
442	1.51919e-05	83	1082	22	0.0203327	0.26506	GO:0031960	GO:BP	response to corticosteroid	12863	8538	3.15108
443	1.55917e-05	123	1082	28	0.025878	0.227642	GO:0043484	GO:BP	regulation of RNA splicing	12863	12459	2.70625
444	1.62394e-05	159	1082	33	0.0304991	0.207547	GO:0050852	GO:BP	T cell receptor signaling pathway	12863	15508	2.46736
445	1.62547e-05	2598	1082	281	0.259704	0.10816	GO:2000112	GO:BP	regulation of cellular macromolecule biosynthetic process	12863	29382	1.28583
446	1.69913e-05	228	1082	42	0.038817	0.184211	GO:0007249	GO:BP	I-kappaB kinase/NF-kappaB signaling	12863	3177	2.18993
447	1.75839e-05	403	1082	63	0.0582255	0.156328	GO:0098771	GO:BP	inorganic ion homeostasis	12863	22298	1.85845
448	1.78266e-05	205	1082	39	0.0360444	0.190244	GO:0018108	GO:BP	peptidyl-tyrosine phosphorylation	12863	6053	2.26165
449	1.8632e-05	160	1082	33	0.0304991	0.20625	GO:0019884	GO:BP	antigen processing and presentation of exogenous antigen	12863	7052	2.45194
450	1.87248e-05	492	1082	73	0.0674677	0.148374	GO:0030162	GO:BP	regulation of proteolysis	12863	7779	1.7639
451	1.89455e-05	229	1082	42	0.038817	0.183406	GO:0032956	GO:BP	regulation of actin cytoskeleton organization	12863	9214	2.18036
452	1.94642e-05	153	1082	32	0.0295749	0.20915	GO:0002478	GO:BP	antigen processing and presentation of exogenous peptide antigen	12863	1148	2.48641
453	1.98066e-05	33	1082	13	0.0120148	0.393939	GO:0071385	GO:BP	cellular response to glucocorticoid stimulus	12863	19581	4.68322
454	1.98066e-05	370	1082	59	0.0545287	0.159459	GO:0051493	GO:BP	regulation of cytoskeleton organization	12863	16026	1.89568
455	2.07749e-05	139	1082	30	0.0277264	0.215827	GO:0038061	GO:BP	NIK/NF-kappaB signaling	12863	11241	2.56579
456	2.07749e-05	362	1082	58	0.0536044	0.160221	GO:0006873	GO:BP	cellular ion homeostasis	12863	2850	1.90473
457	2.13486e-05	125	1082	28	0.025878	0.224	GO:0050684	GO:BP	regulation of mRNA processing	12863	15398	2.66295
458	2.27659e-05	85	1082	22	0.0203327	0.258824	GO:0038094	GO:BP	Fc-gamma receptor signaling pathway	12863	11255	3.07694
459	2.29706e-05	215	1082	40	0.0369686	0.186047	GO:0032496	GO:BP	response to lipopolysaccharide	12863	8867	2.21175
460	2.46946e-05	112	1082	26	0.0240296	0.232143	GO:0022408	GO:BP	negative regulation of cell-cell adhesion	12863	7639	2.75975
461	2.48803e-05	505	1082	74	0.0683919	0.146535	GO:0043086	GO:BP	negative regulation of catalytic activity	12863	12230	1.74203
462	2.52444e-05	208	1082	39	0.0360444	0.1875	GO:0018212	GO:BP	peptidyl-tyrosine modification	12863	6144	2.22903
463	2.5467e-05	399	1082	62	0.0573013	0.155388	GO:0055080	GO:BP	cation homeostasis	12863	16933	1.84728
464	2.56023e-05	185	1082	36	0.0332717	0.194595	GO:0051091	GO:BP	positive regulation of DNA-binding transcription factor activity	12863	15708	2.31337
465	2.56545e-05	356	1082	57	0.0526802	0.160112	GO:0030003	GO:BP	cellular cation homeostasis	12863	7727	1.90344
466	2.56545e-05	73	1082	20	0.0184843	0.273973	GO:0050868	GO:BP	negative regulation of T cell activation	12863	15524	3.25703
467	2.68941e-05	99	1082	24	0.0221811	0.242424	GO:0032675	GO:BP	regulation of interleukin-6 production	12863	8988	2.88198
468	2.86294e-05	134	1082	29	0.0268022	0.216418	GO:0042098	GO:BP	T cell proliferation	12863	11617	2.57281
469	2.89231e-05	186	1082	36	0.0332717	0.193548	GO:0071826	GO:BP	ribonucleoprotein complex subunit organization	12863	19913	2.30094
470	2.99092e-05	375	1082	59	0.0545287	0.157333	GO:1902532	GO:BP	negative regulation of intracellular signal transduction	12863	25735	1.87041
471	3.02411e-05	463	1082	69	0.0637708	0.149028	GO:0051347	GO:BP	positive regulation of transferase activity	12863	15927	1.77167
472	3.36524e-05	107	1082	25	0.0231054	0.233645	GO:0042129	GO:BP	regulation of T cell proliferation	12863	11638	2.77761
473	3.39393e-05	1263	1082	152	0.140481	0.120348	GO:0045935	GO:BP	positive regulation of nucleobase-containing compound metabolic process	12863	13765	1.43072
474	3.66359e-05	839	1082	109	0.100739	0.129917	GO:0051336	GO:BP	regulation of hydrolase activity	12863	15916	1.54447
475	3.71324e-05	395	1082	61	0.0563771	0.15443	GO:0033674	GO:BP	positive regulation of kinase activity	12863	9671	1.83589
476	3.90348e-05	40	1082	14	0.012939	0.35	GO:0035722	GO:BP	interleukin-12-mediated signaling pathway	12863	10656	4.16086
477	3.99944e-05	440	1082	66	0.0609982	0.15	GO:0050801	GO:BP	ion homeostasis	12863	15467	1.78323
478	4.13155e-05	35	1082	13	0.0120148	0.371429	GO:0071384	GO:BP	cellular response to corticosteroid stimulus	12863	19580	4.41561
479	4.16423e-05	69	1082	19	0.0175601	0.275362	GO:0002832	GO:BP	negative regulation of response to biotic stimulus	12863	1494	3.27355
480	4.16423e-05	69	1082	19	0.0175601	0.275362	GO:2000117	GO:BP	negative regulation of cysteine-type endopeptidase activity	12863	29387	3.27355
481	4.37886e-05	1138	1082	139	0.128466	0.122144	GO:0048468	GO:BP	cell development	12863	14933	1.45207
482	4.39642e-05	159	1082	32	0.0295749	0.201258	GO:0002221	GO:BP	pattern recognition receptor signaling pathway	12863	893	2.39259
483	4.45264e-05	137	1082	29	0.0268022	0.211679	GO:0071383	GO:BP	cellular response to steroid hormone stimulus	12863	19579	2.51647
484	4.46663e-05	221	1082	40	0.0369686	0.180995	GO:0050727	GO:BP	regulation of inflammatory response	12863	15413	2.1517
485	4.51822e-05	424	1082	64	0.0591497	0.150943	GO:0043408	GO:BP	regulation of MAPK cascade	12863	12398	1.79444
486	4.60373e-05	606	1082	84	0.077634	0.138614	GO:0043549	GO:BP	regulation of kinase activity	12863	12496	1.64787
487	4.80682e-05	198	1082	37	0.0341959	0.186869	GO:0045861	GO:BP	negative regulation of proteolysis	12863	13697	2.22153
488	4.85916e-05	76	1082	20	0.0184843	0.263158	GO:0042590	GO:BP	antigen processing and presentation of exogenous peptide antigen via MHC class I	12863	11924	3.12847
489	4.92511e-05	338	1082	54	0.0499076	0.159763	GO:0051656	GO:BP	establishment of organelle localization	12863	16155	1.89929
490	4.92568e-05	874	1082	112	0.103512	0.128146	GO:0022008	GO:BP	neurogenesis	12863	7600	1.52343
491	4.9415e-05	230	1082	41	0.0378928	0.178261	GO:0045088	GO:BP	regulation of innate immune response	12863	13231	2.1192
492	5.1419e-05	70	1082	19	0.0175601	0.271429	GO:0030838	GO:BP	positive regulation of actin filament polymerization	12863	8073	3.22679
493	5.28319e-05	41	1082	14	0.012939	0.341463	GO:0097479	GO:BP	synaptic vesicle localization	12863	22061	4.05938
494	5.31419e-05	64	1082	18	0.0166359	0.28125	GO:0043154	GO:BP	negative regulation of cysteine-type endopeptidase activity involved in apoptotic process	12863	12274	3.34355
495	5.38442e-05	103	1082	24	0.0221811	0.23301	GO:0034101	GO:BP	erythrocyte homeostasis	12863	9738	2.77006
496	5.40062e-05	124	1082	27	0.0249538	0.217742	GO:0051092	GO:BP	positive regulation of NF-kappaB transcription factor activity	12863	15709	2.58855
497	5.40533e-05	207	1082	38	0.0351201	0.183575	GO:0050817	GO:BP	coagulation	12863	15479	2.18237
498	5.40533e-05	207	1082	38	0.0351201	0.183575	GO:0010959	GO:BP	regulation of metal ion transport	12863	5119	2.18237
499	5.57774e-05	314	1082	51	0.0471349	0.16242	GO:0002790	GO:BP	peptide secretion	12863	1453	1.93088
500	5.68548e-05	184	1082	35	0.0323475	0.190217	GO:0043903	GO:BP	regulation of symbiotic process	12863	12603	2.26134
501	5.70476e-05	289	1082	48	0.0443623	0.16609	GO:0043434	GO:BP	response to peptide hormone	12863	12413	1.97451
502	6.04156e-05	208	1082	38	0.0351201	0.182692	GO:0007599	GO:BP	hemostasis	12863	3495	2.17188
503	6.25829e-05	125	1082	27	0.0249538	0.216	GO:0002262	GO:BP	myeloid cell homeostasis	12863	932	2.56784
504	6.31985e-05	71	1082	19	0.0175601	0.267606	GO:2000379	GO:BP	positive regulation of reactive oxygen species metabolic process	12863	29644	3.18134
505	6.39378e-05	185	1082	35	0.0323475	0.189189	GO:0110053	GO:BP	regulation of actin filament organization	12863	22853	2.24911
506	6.51757e-05	84	1082	21	0.0194085	0.25	GO:0050729	GO:BP	positive regulation of inflammatory response	12863	15415	2.97204
507	6.68918e-05	170	1082	33	0.0304991	0.194118	GO:0043406	GO:BP	positive regulation of MAP kinase activity	12863	12396	2.3077
508	6.68918e-05	140	1082	29	0.0268022	0.207143	GO:0031348	GO:BP	negative regulation of defense response	12863	8344	2.46255
509	6.98476e-05	91	1082	22	0.0203327	0.241758	GO:0001906	GO:BP	cell killing	12863	655	2.87406
510	7.07202e-05	42	1082	14	0.012939	0.333333	GO:0071349	GO:BP	cellular response to interleukin-12	12863	19545	3.96272
511	7.15242e-05	78	1082	20	0.0184843	0.25641	GO:1903038	GO:BP	negative regulation of leukocyte cell-cell adhesion	12863	26174	3.04825
512	7.15242e-05	78	1082	20	0.0184843	0.25641	GO:0002761	GO:BP	regulation of myeloid leukocyte differentiation	12863	1424	3.04825
513	7.16173e-05	300	1082	49	0.0452865	0.163333	GO:0071692	GO:BP	protein localization to extracellular region	12863	19838	1.94173
514	7.76309e-05	72	1082	19	0.0175601	0.263889	GO:1903557	GO:BP	positive regulation of tumor necrosis factor superfamily cytokine production	12863	26635	3.13716
515	8.51628e-05	60	1082	17	0.0157116	0.283333	GO:0042255	GO:BP	ribosome assembly	12863	11721	3.36831
516	8.80694e-05	106	1082	24	0.0221811	0.226415	GO:1904018	GO:BP	positive regulation of vasculature development	12863	27046	2.69166
517	9.33087e-05	165	1082	32	0.0295749	0.193939	GO:0048002	GO:BP	antigen processing and presentation of peptide antigen	12863	14605	2.30558
518	9.50126e-05	150	1082	30	0.0277264	0.2	GO:0043123	GO:BP	positive regulation of I-kappaB kinase/NF-kappaB signaling	12863	12255	2.37763
519	9.51285e-05	43	1082	14	0.012939	0.325581	GO:0070671	GO:BP	response to interleukin-12	12863	19162	3.87057
520	9.80344e-05	312	1082	50	0.0462107	0.160256	GO:0030855	GO:BP	epithelial cell differentiation	12863	8088	1.90516
521	9.82615e-05	3623	1082	368	0.340111	0.101573	GO:0090304	GO:BP	nucleic acid metabolic process	12863	21522	1.20752
522	9.90837e-05	1137	1082	137	0.126617	0.120493	GO:0051254	GO:BP	positive regulation of RNA metabolic process	12863	15849	1.43244
523	0.000103234	107	1082	24	0.0221811	0.224299	GO:0032635	GO:BP	interleukin-6 production	12863	8948	2.66651
524	0.000104302	49	1082	15	0.0138632	0.306122	GO:0050830	GO:BP	defense response to Gram-positive bacterium	12863	15489	3.63924
525	0.000106398	136	1082	28	0.025878	0.205882	GO:2000377	GO:BP	regulation of reactive oxygen species metabolic process	12863	29642	2.44756
526	0.00011178	182	1082	34	0.0314233	0.186813	GO:0001818	GO:BP	negative regulation of cytokine production	12863	602	2.22087
527	0.00011316	263	1082	44	0.0406654	0.1673	GO:0051346	GO:BP	negative regulation of hydrolase activity	12863	15926	1.9889
528	0.00011336	87	1082	21	0.0194085	0.241379	GO:0002431	GO:BP	Fc receptor mediated stimulatory signaling pathway	12863	1101	2.86956
529	0.000114772	144	1082	29	0.0268022	0.201389	GO:1902905	GO:BP	positive regulation of supramolecular fiber organization	12863	26051	2.39415
530	0.0001187	538	1082	75	0.0693161	0.139405	GO:0045859	GO:BP	regulation of protein kinase activity	12863	13695	1.65727
531	0.00012478	8	1082	6	0.00554529	0.75	GO:0002480	GO:BP	antigen processing and presentation of exogenous peptide antigen via MHC class I, TAP-independent	12863	1150	8.91613
532	0.00012478	8	1082	6	0.00554529	0.75	GO:0045657	GO:BP	positive regulation of monocyte differentiation	12863	13509	8.91613
533	0.00012478	1062	1082	129	0.119224	0.121469	GO:0009890	GO:BP	negative regulation of biosynthetic process	12863	4251	1.44404
534	0.000125673	376	1082	57	0.0526802	0.151596	GO:0098662	GO:BP	inorganic cation transmembrane transport	12863	22225	1.8022
535	0.000125673	661	1082	88	0.0813309	0.133132	GO:0048878	GO:BP	chemical homeostasis	12863	15297	1.58269
536	0.000125838	298	1082	48	0.0443623	0.161074	GO:0009306	GO:BP	protein secretion	12863	3921	1.91487
537	0.000125838	298	1082	48	0.0443623	0.161074	GO:0035592	GO:BP	establishment of protein localization to extracellular region	12863	10564	1.91487
538	0.000126126	256	1082	43	0.0397412	0.167969	GO:0030098	GO:BP	lymphocyte differentiation	12863	7761	1.99684
539	0.000126126	81	1082	20	0.0184843	0.246914	GO:0038096	GO:BP	Fc-gamma receptor signaling pathway involved in phagocytosis	12863	11257	2.93535
540	0.000126126	81	1082	20	0.0184843	0.246914	GO:0002433	GO:BP	immune response-regulating cell surface receptor signaling pathway involved in phagocytosis	12863	1103	2.93535
541	0.000126328	130	1082	27	0.0249538	0.207692	GO:0002793	GO:BP	positive regulation of peptide secretion	12863	1456	2.46908
542	0.000130075	307	1082	49	0.0452865	0.159609	GO:0043410	GO:BP	positive regulation of MAPK cascade	12863	12400	1.89746
543	0.000131716	123	1082	26	0.0240296	0.211382	GO:0050714	GO:BP	positive regulation of protein secretion	12863	15411	2.51295
544	0.000137704	224	1082	39	0.0360444	0.174107	GO:0043405	GO:BP	regulation of MAP kinase activity	12863	12395	2.06982
545	0.00014554	131	1082	27	0.0249538	0.206107	GO:0097529	GO:BP	myeloid leukocyte migration	12863	22080	2.45023
546	0.0001474	1006	1082	123	0.113678	0.122266	GO:0010558	GO:BP	negative regulation of macromolecule biosynthetic process	12863	4750	1.45352
547	0.000152829	957	1082	118	0.109057	0.123302	GO:0033043	GO:BP	regulation of organelle organization	12863	9273	1.46583
548	0.000152986	69	1082	18	0.0166359	0.26087	GO:0002286	GO:BP	T cell activation involved in immune response	12863	956	3.10126
549	0.000154758	275	1082	45	0.0415896	0.163636	GO:0016050	GO:BP	vesicle organization	12863	5700	1.94534
550	0.000159013	89	1082	21	0.0194085	0.235955	GO:0008630	GO:BP	intrinsic apoptotic signaling pathway in response to DNA damage	12863	3676	2.80507
551	0.000162959	96	1082	22	0.0203327	0.229167	GO:0050731	GO:BP	positive regulation of peptidyl-tyrosine phosphorylation	12863	15417	2.72437
552	0.000166117	371	1082	56	0.051756	0.150943	GO:1903530	GO:BP	regulation of secretion by cell	12863	26609	1.79444
553	0.000166514	147	1082	29	0.0268022	0.197279	GO:2001235	GO:BP	positive regulation of apoptotic signaling pathway	12863	30448	2.34529
554	0.000166514	147	1082	29	0.0268022	0.197279	GO:0071219	GO:BP	cellular response to molecule of bacterial origin	12863	19421	2.34529
555	0.000168897	76	1082	19	0.0175601	0.25	GO:0071621	GO:BP	granulocyte chemotaxis	12863	19779	2.97204
556	0.000173531	354	1082	54	0.0499076	0.152542	GO:0045860	GO:BP	positive regulation of protein kinase activity	12863	13696	1.81345
557	0.000178352	140	1082	28	0.025878	0.2	GO:0071222	GO:BP	cellular response to lipopolysaccharide	12863	19424	2.37763
558	0.000180757	235	1082	40	0.0369686	0.170213	GO:0071496	GO:BP	cellular response to external stimulus	12863	19684	2.02352
559	0.000186224	70	1082	18	0.0166359	0.257143	GO:0032760	GO:BP	positive regulation of tumor necrosis factor production	12863	9073	3.05696
560	0.000187811	90	1082	21	0.0194085	0.233333	GO:1903707	GO:BP	negative regulation of hemopoiesis	12863	26781	2.77391
561	0.000191759	187	1082	34	0.0314233	0.181818	GO:0042113	GO:BP	B cell activation	12863	11626	2.16149
562	0.000196274	584	1082	79	0.0730129	0.135274	GO:0000902	GO:BP	cell morphogenesis	12863	312	1.60816
563	0.000199739	126	1082	26	0.0240296	0.206349	GO:0002685	GO:BP	regulation of leukocyte migration	12863	1354	2.45311
564	0.000199739	126	1082	26	0.0240296	0.206349	GO:0045619	GO:BP	regulation of lymphocyte differentiation	12863	13471	2.45311
565	0.000213169	204	1082	36	0.0332717	0.176471	GO:0007596	GO:BP	blood coagulation	12863	3492	2.09791
566	0.00021394	196	1082	35	0.0323475	0.178571	GO:1903532	GO:BP	positive regulation of secretion by cell	12863	26611	2.12289
567	0.000217297	511	1082	71	0.0656192	0.138943	GO:0060284	GO:BP	regulation of cell development	12863	17212	1.65178
568	0.000217919	322	1082	50	0.0462107	0.15528	GO:0042326	GO:BP	negative regulation of phosphorylation	12863	11757	1.84599
569	0.000222	157	1082	30	0.0277264	0.191083	GO:0051495	GO:BP	positive regulation of cytoskeleton organization	12863	16028	2.27162
570	0.000224935	577	1082	78	0.0720887	0.135182	GO:0034220	GO:BP	ion transmembrane transport	12863	9843	1.60707
571	0.000225282	71	1082	18	0.0166359	0.253521	GO:0002479	GO:BP	antigen processing and presentation of exogenous peptide antigen via MHC class I, TAP-dependent	12863	1149	3.0139
572	0.00023523	205	1082	36	0.0332717	0.17561	GO:0051047	GO:BP	positive regulation of secretion	12863	15678	2.08768
573	0.000235454	25	1082	10	0.00924214	0.4	GO:1903131	GO:BP	mononuclear cell differentiation	12863	26259	4.75527
574	0.000235454	25	1082	10	0.00924214	0.4	GO:0030224	GO:BP	monocyte differentiation	12863	7823	4.75527
575	0.000235454	25	1082	10	0.00924214	0.4	GO:0002888	GO:BP	positive regulation of myeloid leukocyte mediated immunity	12863	1550	4.75527
576	0.000235454	197	1082	35	0.0323475	0.177665	GO:0002460	GO:BP	adaptive immune response based on somatic recombination of immune receptors built from immunoglobulin superfamily domains	12863	1130	2.11211
577	0.000255278	214	1082	37	0.0341959	0.172897	GO:0007568	GO:BP	aging	12863	3466	2.05543
578	0.000255278	166	1082	31	0.0286506	0.186747	GO:0097191	GO:BP	extrinsic apoptotic signaling pathway	12863	21905	2.22008
579	0.000255278	166	1082	31	0.0286506	0.186747	GO:0000302	GO:BP	response to reactive oxygen species	12863	136	2.22008
580	0.000256655	404	1082	59	0.0545287	0.14604	GO:0045936	GO:BP	negative regulation of phosphate metabolic process	12863	13766	1.73614
581	0.000258471	143	1082	28	0.025878	0.195804	GO:0050730	GO:BP	regulation of peptidyl-tyrosine phosphorylation	12863	15416	2.32775
582	0.000260707	198	1082	35	0.0323475	0.176768	GO:0043122	GO:BP	regulation of I-kappaB kinase/NF-kappaB signaling	12863	12254	2.10144
583	0.000270914	72	1082	18	0.0166359	0.25	GO:0071357	GO:BP	cellular response to type I interferon	12863	19553	2.97204
584	0.000270914	72	1082	18	0.0166359	0.25	GO:0060337	GO:BP	type I interferon signaling pathway	12863	17263	2.97204
585	0.000274201	405	1082	59	0.0545287	0.145679	GO:0010563	GO:BP	negative regulation of phosphorus metabolic process	12863	4755	1.73186
586	0.000286645	114	1082	24	0.0221811	0.210526	GO:0002224	GO:BP	toll-like receptor signaling pathway	12863	896	2.50277
587	0.000288584	199	1082	35	0.0323475	0.175879	GO:0048872	GO:BP	homeostasis of number of cells	12863	15291	2.09088
588	0.000288584	175	1082	32	0.0295749	0.182857	GO:0050792	GO:BP	regulation of viral process	12863	15460	2.17384
589	0.000293343	406	1082	59	0.0545287	0.14532	GO:0098660	GO:BP	inorganic ion transmembrane transport	12863	22223	1.72759
590	0.000294116	36	1082	12	0.0110906	0.333333	GO:0038066	GO:BP	p38MAPK cascade	12863	11244	3.96272
591	0.000298872	726	1082	93	0.0859519	0.128099	GO:0030182	GO:BP	neuron differentiation	12863	7790	1.52286
592	0.000298872	86	1082	20	0.0184843	0.232558	GO:0002687	GO:BP	positive regulation of leukocyte migration	12863	1356	2.76469
593	0.000311009	241	1082	40	0.0369686	0.165975	GO:0070997	GO:BP	neuron death	12863	19351	1.97314
594	0.000311009	241	1082	40	0.0369686	0.165975	GO:0002791	GO:BP	regulation of peptide secretion	12863	1454	1.97314
595	0.000311009	241	1082	40	0.0369686	0.165975	GO:0032535	GO:BP	regulation of cellular component size	12863	8894	1.97314
596	0.000311237	122	1082	25	0.0231054	0.204918	GO:1903900	GO:BP	regulation of viral life cycle	12863	26939	2.4361
597	0.000311965	4000	1082	397	0.366913	0.09925	GO:0006139	GO:BP	nucleobase-containing compound metabolic process	12863	2192	1.1799
598	0.000311965	508	1082	70	0.064695	0.137795	GO:0051640	GO:BP	organelle localization	12863	16139	1.63813
599	0.000326441	31	1082	11	0.0101664	0.354839	GO:0034314	GO:BP	Arp2/3 complex-mediated actin nucleation	12863	9910	4.21838
600	0.000326898	145	1082	28	0.025878	0.193103	GO:0097305	GO:BP	response to alcohol	12863	21973	2.29565
601	0.000337559	217	1082	37	0.0341959	0.170507	GO:0010038	GO:BP	response to metal ion	12863	4353	2.02702
602	0.000338478	48	1082	14	0.012939	0.291667	GO:0046686	GO:BP	response to cadmium ion	12863	14418	3.46738
603	0.000338478	108	1082	23	0.0212569	0.212963	GO:0042542	GO:BP	response to hydrogen peroxide	12863	11906	2.53174
604	0.000352103	94	1082	21	0.0194085	0.223404	GO:0055076	GO:BP	transition metal ion homeostasis	12863	16930	2.65587
605	0.000352103	169	1082	31	0.0286506	0.183432	GO:0045333	GO:BP	cellular respiration	12863	13338	2.18067
606	0.00035408	123	1082	25	0.0231054	0.203252	GO:0002064	GO:BP	epithelial cell development	12863	788	2.41629
607	0.000357003	967	1082	117	0.108133	0.120993	GO:2000113	GO:BP	negative regulation of cellular macromolecule biosynthetic process	12863	29383	1.43838
608	0.000359642	226	1082	38	0.0351201	0.168142	GO:0032147	GO:BP	activation of protein kinase activity	12863	8628	1.9989
609	0.000369858	483	1082	67	0.0619224	0.138716	GO:0010638	GO:BP	positive regulation of organelle organization	12863	4824	1.64908
610	0.000370566	437	1082	62	0.0573013	0.141876	GO:0098655	GO:BP	cation transmembrane transport	12863	22218	1.68665
611	0.000382484	286	1082	45	0.0415896	0.157343	GO:0032386	GO:BP	regulation of intracellular transport	12863	8799	1.87052
612	0.000396998	1040	1082	124	0.114603	0.119231	GO:0031327	GO:BP	negative regulation of cellular biosynthetic process	12863	8324	1.41744
613	0.000409089	366	1082	54	0.0499076	0.147541	GO:0044089	GO:BP	positive regulation of cellular component biogenesis	12863	12731	1.75399
614	0.000417085	211	1082	36	0.0332717	0.170616	GO:1901214	GO:BP	regulation of neuron death	12863	24544	2.02831
615	0.000419226	236	1082	39	0.0360444	0.165254	GO:0042493	GO:BP	response to drug	12863	11889	1.96457
616	0.000424973	203	1082	35	0.0323475	0.172414	GO:0032868	GO:BP	response to insulin	12863	9138	2.04968
617	0.00042918	132	1082	26	0.0240296	0.19697	GO:0002285	GO:BP	lymphocyte activation involved in immune response	12863	955	2.34161
618	0.000431817	68	1082	17	0.0157116	0.25	GO:0001909	GO:BP	leukocyte mediated cytotoxicity	12863	657	2.97204
619	0.000431817	228	1082	38	0.0351201	0.166667	GO:0050708	GO:BP	regulation of protein secretion	12863	15408	1.98136
620	0.000445355	220	1082	37	0.0341959	0.168182	GO:0071375	GO:BP	cellular response to peptide hormone stimulus	12863	19571	1.99937
621	0.000447863	813	1082	101	0.0933457	0.124231	GO:0048699	GO:BP	generation of neurons	12863	15127	1.47688
622	0.000458791	125	1082	25	0.0231054	0.2	GO:0002819	GO:BP	regulation of adaptive immune response	12863	1481	2.37763
623	0.000460091	75	1082	18	0.0166359	0.24	GO:0046916	GO:BP	cellular transition metal ion homeostasis	12863	14567	2.85316
624	0.00047224	280	1082	44	0.0406654	0.157143	GO:0050878	GO:BP	regulation of body fluid levels	12863	15531	1.86814
625	0.000474529	96	1082	21	0.0194085	0.21875	GO:0002705	GO:BP	positive regulation of leukocyte mediated immunity	12863	1374	2.60054
626	0.000474529	82	1082	19	0.0175601	0.231707	GO:1901222	GO:BP	regulation of NIK/NF-kappaB signaling	12863	24552	2.75458
627	0.000474529	96	1082	21	0.0194085	0.21875	GO:0030218	GO:BP	erythrocyte differentiation	12863	7817	2.60054
628	0.000482829	180	1082	32	0.0295749	0.177778	GO:0030217	GO:BP	T cell differentiation	12863	7816	2.11345
629	0.000500698	378	1082	55	0.0508318	0.145503	GO:0006897	GO:BP	endocytosis	12863	2874	1.72976
630	0.000543893	2480	1082	259	0.239372	0.104435	GO:0051252	GO:BP	regulation of RNA metabolic process	12863	15847	1.24155
631	0.000549132	76	1082	18	0.0166359	0.236842	GO:0034340	GO:BP	response to type I interferon	12863	9921	2.81562
632	0.000563005	90	1082	20	0.0184843	0.222222	GO:0050671	GO:BP	positive regulation of lymphocyte proliferation	12863	15388	2.64182
633	0.000563005	90	1082	20	0.0184843	0.222222	GO:0032946	GO:BP	positive regulation of mononuclear cell proliferation	12863	9205	2.64182
634	0.00057293	344	1082	51	0.0471349	0.148256	GO:0055065	GO:BP	metal ion homeostasis	12863	16919	1.76249
635	0.000578509	198	1082	34	0.0314233	0.171717	GO:0071356	GO:BP	cellular response to tumor necrosis factor	12863	19552	2.0414
636	0.000580511	1494	1082	167	0.154344	0.11178	GO:0006366	GO:BP	transcription by RNA polymerase II	12863	2396	1.32887
637	0.000597409	318	1082	48	0.0443623	0.150943	GO:0000377	GO:BP	RNA splicing, via transesterification reactions with bulged adenosine as nucleophile	12863	160	1.79444
638	0.000597409	166	1082	30	0.0277264	0.180723	GO:0032869	GO:BP	cellular response to insulin stimulus	12863	9139	2.14846
639	0.000597409	318	1082	48	0.0443623	0.150943	GO:0000398	GO:BP	mRNA splicing, via spliceosome	12863	172	1.79444
640	0.000610677	390	1082	56	0.051756	0.14359	GO:0070848	GO:BP	response to growth factor	12863	19256	1.70702
641	0.00061235	4	1082	4	0.00369686	1	GO:1902822	GO:BP	regulation of late endosome to lysosome transport	12863	25976	11.8882
642	0.00061669	135	1082	26	0.0240296	0.192593	GO:0060759	GO:BP	regulation of response to cytokine stimulus	12863	17666	2.28957
643	0.000627283	57	1082	15	0.0138632	0.263158	GO:0000381	GO:BP	regulation of alternative mRNA splicing, via spliceosome	12863	164	3.12847
644	0.000662045	216	1082	36	0.0332717	0.166667	GO:0034612	GO:BP	response to tumor necrosis factor	12863	10049	1.98136
645	0.000666768	10	1082	6	0.00554529	0.6	GO:0001731	GO:BP	formation of translation preinitiation complex	12863	536	7.1329
646	0.000682909	45	1082	13	0.0120148	0.288889	GO:0002886	GO:BP	regulation of myeloid leukocyte mediated immunity	12863	1548	3.43436
647	0.000684937	23	1082	9	0.00831793	0.391304	GO:0042534	GO:BP	regulation of tumor necrosis factor biosynthetic process	12863	11898	4.65189
648	0.000684937	23	1082	9	0.00831793	0.391304	GO:0042533	GO:BP	tumor necrosis factor biosynthetic process	12863	11897	4.65189
649	0.000696524	64	1082	16	0.0147874	0.25	GO:0045582	GO:BP	positive regulation of T cell differentiation	12863	13434	2.97204
650	0.000697101	1374	1082	155	0.143253	0.112809	GO:0006357	GO:BP	regulation of transcription by RNA polymerase II	12863	2389	1.3411
651	0.000726182	303	1082	46	0.0425139	0.151815	GO:0006875	GO:BP	cellular metal ion homeostasis	12863	2852	1.8048
652	0.000736245	160	1082	29	0.0268022	0.18125	GO:0045089	GO:BP	positive regulation of innate immune response	12863	13232	2.15473
653	0.000736573	99	1082	21	0.0194085	0.212121	GO:0050864	GO:BP	regulation of B cell activation	12863	15520	2.52173
654	0.000738786	71	1082	17	0.0157116	0.239437	GO:0030048	GO:BP	actin filament-based movement	12863	7750	2.84646
655	0.000738786	71	1082	17	0.0157116	0.239437	GO:0006446	GO:BP	regulation of translational initiation	12863	2464	2.84646
656	0.000739652	321	1082	48	0.0443623	0.149533	GO:0000375	GO:BP	RNA splicing, via transesterification reactions	12863	158	1.77767
657	0.000761611	78	1082	18	0.0166359	0.230769	GO:0007519	GO:BP	skeletal muscle tissue development	12863	3418	2.74342
658	0.000763335	58	1082	15	0.0138632	0.258621	GO:0002526	GO:BP	acute inflammatory response	12863	1195	3.07453
659	0.000775662	269	1082	42	0.038817	0.156134	GO:0019058	GO:BP	viral life cycle	12863	6473	1.85615
660	0.000798012	4111	1082	403	0.372458	0.0980297	GO:0006725	GO:BP	cellular aromatic compound metabolic process	12863	2726	1.16539
661	0.000806922	107	1082	22	0.0203327	0.205607	GO:0043620	GO:BP	regulation of DNA-templated transcription in response to stress	12863	12548	2.4443
662	0.000832869	404	1082	57	0.0526802	0.141089	GO:0008380	GO:BP	RNA splicing	12863	3643	1.67729
663	0.000834811	65	1082	16	0.0147874	0.246154	GO:0032755	GO:BP	positive regulation of interleukin-6 production	12863	9068	2.92632
664	0.000847477	130	1082	25	0.0231054	0.192308	GO:0010950	GO:BP	positive regulation of endopeptidase activity	12863	5111	2.28619
665	0.000858887	332	1082	49	0.0452865	0.14759	GO:0061061	GO:BP	muscle structure development	12863	17956	1.75458
666	0.000874533	93	1082	20	0.0184843	0.215054	GO:0097530	GO:BP	granulocyte migration	12863	22081	2.5566
667	0.000874533	93	1082	20	0.0184843	0.215054	GO:0002474	GO:BP	antigen processing and presentation of peptide antigen via MHC class I	12863	1144	2.5566
668	0.000891294	1184	1082	136	0.125693	0.114865	GO:0006508	GO:BP	proteolysis	12863	2517	1.36553
669	0.000942509	220	1082	36	0.0332717	0.163636	GO:0033157	GO:BP	regulation of intracellular protein transport	12863	9348	1.94534
670	0.000962246	298	1082	45	0.0415896	0.151007	GO:0090066	GO:BP	regulation of anatomical structure size	12863	21292	1.79519
671	0.000970532	1063	1082	124	0.114603	0.116651	GO:1903508	GO:BP	positive regulation of nucleic acid-templated transcription	12863	26587	1.38677
672	0.00100214	171	1082	30	0.0277264	0.175439	GO:0051650	GO:BP	establishment of vesicle localization	12863	16149	2.08564
673	0.00100846	1064	1082	124	0.114603	0.116541	GO:1902680	GO:BP	positive regulation of RNA biosynthetic process	12863	25853	1.38546
674	0.00102794	882	1082	106	0.0979667	0.120181	GO:0007010	GO:BP	cytoskeleton organization	12863	2967	1.42874
675	0.0010545	80	1082	18	0.0166359	0.225	GO:0002821	GO:BP	positive regulation of adaptive immune response	12863	1483	2.67484
676	0.00109184	41	1082	12	0.0110906	0.292683	GO:0042035	GO:BP	regulation of cytokine biosynthetic process	12863	11576	3.47946
677	0.00112126	102	1082	21	0.0194085	0.205882	GO:0046631	GO:BP	alpha-beta T cell activation	12863	14369	2.44756
678	0.00112262	117	1082	23	0.0212569	0.196581	GO:0002218	GO:BP	activation of innate immune response	12863	891	2.33699
679	0.00112262	569	1082	74	0.0683919	0.130053	GO:0000122	GO:BP	negative regulation of transcription by RNA polymerase II	12863	64	1.54609
680	0.00113315	1284	1082	145	0.134011	0.112928	GO:0007399	GO:BP	nervous system development	12863	3311	1.34251
681	0.00117486	125	1082	24	0.0221811	0.192	GO:0001959	GO:BP	regulation of cytokine-mediated signaling pathway	12863	699	2.28253
682	0.00119907	67	1082	16	0.0147874	0.238806	GO:0000380	GO:BP	alternative mRNA splicing, via spliceosome	12863	163	2.83897
683	0.00120405	110	1082	22	0.0203327	0.2	GO:0008360	GO:BP	regulation of cell shape	12863	3634	2.37763
684	0.00120794	133	1082	25	0.0231054	0.18797	GO:0030100	GO:BP	regulation of endocytosis	12863	7763	2.23462
685	0.00120794	133	1082	25	0.0231054	0.18797	GO:0033209	GO:BP	tumor necrosis factor-mediated signaling pathway	12863	9364	2.23462
686	0.0012213	173	1082	30	0.0277264	0.17341	GO:0014706	GO:BP	striated muscle tissue development	12863	5236	2.06153
687	0.00133845	224	1082	36	0.0332717	0.160714	GO:0034765	GO:BP	regulation of ion transmembrane transport	12863	10113	1.9106
688	0.00135014	96	1082	20	0.0184843	0.208333	GO:0070665	GO:BP	positive regulation of leukocyte proliferation	12863	19156	2.4767
689	0.00135014	96	1082	20	0.0184843	0.208333	GO:0045766	GO:BP	positive regulation of angiogenesis	12863	13612	2.4767
690	0.00135893	134	1082	25	0.0231054	0.186567	GO:0034249	GO:BP	negative regulation of cellular amide metabolic process	12863	9865	2.21794
691	0.00137991	142	1082	26	0.0240296	0.183099	GO:0010952	GO:BP	positive regulation of peptidase activity	12863	5113	2.17671
692	0.00142651	68	1082	16	0.0147874	0.235294	GO:0030316	GO:BP	osteoclast differentiation	12863	7858	2.79722
693	0.00144047	82	1082	18	0.0166359	0.219512	GO:0060538	GO:BP	skeletal muscle organ development	12863	17455	2.6096
694	0.0014488	75	1082	17	0.0157116	0.226667	GO:0045621	GO:BP	positive regulation of lymphocyte differentiation	12863	13473	2.69465
695	0.00145593	183	1082	31	0.0286506	0.169399	GO:1901342	GO:BP	regulation of vasculature development	12863	24659	2.01384
696	0.00147301	4094	1082	399	0.368762	0.0974597	GO:0046483	GO:BP	heterocycle metabolic process	12863	14282	1.15862
697	0.0014763	295	1082	44	0.0406654	0.149153	GO:0001933	GO:BP	negative regulation of protein phosphorylation	12863	678	1.77315
698	0.00153467	159	1082	28	0.025878	0.176101	GO:0070371	GO:BP	ERK1 and ERK2 cascade	12863	18981	2.09351
699	0.00154097	377	1082	53	0.0489834	0.140584	GO:0071363	GO:BP	cellular response to growth factor stimulus	12863	19559	1.67128
700	0.00170139	76	1082	17	0.0157116	0.223684	GO:0002824	GO:BP	positive regulation of adaptive immune response based on somatic recombination of immune receptors built from immunoglobulin superfamily domains	12863	1486	2.6592
701	0.00170139	397	1082	55	0.0508318	0.138539	GO:0001944	GO:BP	vasculature development	12863	686	1.64698
702	0.00170139	76	1082	17	0.0157116	0.223684	GO:0045471	GO:BP	response to ethanol	12863	13382	2.6592
703	0.00170139	76	1082	17	0.0157116	0.223684	GO:1901216	GO:BP	positive regulation of neuron death	12863	24546	2.6592
704	0.00171649	2680	1082	273	0.252311	0.101866	GO:0019219	GO:BP	regulation of nucleobase-containing compound metabolic process	12863	6526	1.211
705	0.00175127	379	1082	53	0.0489834	0.139842	GO:0001568	GO:BP	blood vessel development	12863	478	1.66246
706	0.00177436	98	1082	20	0.0184843	0.204082	GO:0050777	GO:BP	negative regulation of immune response	12863	15451	2.42616
707	0.00183243	121	1082	23	0.0212569	0.190083	GO:0017148	GO:BP	negative regulation of translation	12863	5943	2.25973
708	0.00183367	56	1082	14	0.012939	0.25	GO:0031341	GO:BP	regulation of cell killing	12863	8337	2.97204
709	0.00188492	16	1082	7	0.0064695	0.4375	GO:0001732	GO:BP	formation of cytoplasmic translation initiation complex	12863	537	5.20107
710	0.00190012	137	1082	25	0.0231054	0.182482	GO:0002244	GO:BP	hematopoietic progenitor cell differentiation	12863	915	2.16937
711	0.00190012	137	1082	25	0.0231054	0.182482	GO:2001242	GO:BP	regulation of intrinsic apoptotic signaling pathway	12863	30455	2.16937
712	0.00192722	186	1082	31	0.0286506	0.166667	GO:0002833	GO:BP	positive regulation of response to biotic stimulus	12863	1495	1.98136
713	0.00193784	63	1082	15	0.0138632	0.238095	GO:0030593	GO:BP	neutrophil chemotaxis	12863	7978	2.83052
714	0.00193784	63	1082	15	0.0138632	0.238095	GO:1902106	GO:BP	negative regulation of leukocyte differentiation	12863	25368	2.83052
715	0.00198154	178	1082	30	0.0277264	0.168539	GO:0051648	GO:BP	vesicle localization	12863	16147	2.00362
716	0.00198281	70	1082	16	0.0147874	0.228571	GO:0032609	GO:BP	interferon-gamma production	12863	8922	2.7173
717	0.00201963	99	1082	20	0.0184843	0.20202	GO:0006900	GO:BP	vesicle budding from membrane	12863	2876	2.40165
718	0.00202899	610	1082	77	0.0711645	0.12623	GO:0060429	GO:BP	epithelium development	12863	17347	1.50064
719	0.00206377	8	1082	5	0.00462107	0.625	GO:0070142	GO:BP	synaptic vesicle budding	12863	18824	7.43011
720	0.00206578	162	1082	28	0.025878	0.17284	GO:0051402	GO:BP	neuron apoptotic process	12863	15963	2.05475
721	0.00211559	4238	1082	410	0.378928	0.0967437	GO:1901360	GO:BP	organic cyclic compound metabolic process	12863	24676	1.15011
722	0.00213312	92	1082	19	0.0175601	0.206522	GO:0031333	GO:BP	negative regulation of protein-containing complex assembly	12863	8329	2.45517
723	0.00213784	32	1082	10	0.00924214	0.3125	GO:0035914	GO:BP	skeletal muscle cell differentiation	12863	10810	3.71505
724	0.00213784	44	1082	12	0.0110906	0.272727	GO:0043525	GO:BP	positive regulation of neuron apoptotic process	12863	12485	3.24223
725	0.00213784	44	1082	12	0.0110906	0.272727	GO:0042089	GO:BP	cytokine biosynthetic process	12863	11614	3.24223
726	0.00213784	44	1082	12	0.0110906	0.272727	GO:0042107	GO:BP	cytokine metabolic process	12863	11622	3.24223
727	0.00213784	32	1082	10	0.00924214	0.3125	GO:0061028	GO:BP	establishment of endothelial barrier	12863	17924	3.71505
728	0.00213784	44	1082	12	0.0110906	0.272727	GO:0032623	GO:BP	interleukin-2 production	12863	8936	3.24223
729	0.00215145	179	1082	30	0.0277264	0.167598	GO:0031668	GO:BP	cellular response to extracellular stimulus	12863	8498	1.99243
730	0.00219665	38	1082	11	0.0101664	0.289474	GO:0045010	GO:BP	actin nucleation	12863	13178	3.44131
731	0.00219665	38	1082	11	0.0101664	0.289474	GO:0031343	GO:BP	positive regulation of cell killing	12863	8339	3.44131
732	0.00221222	115	1082	22	0.0203327	0.191304	GO:0032479	GO:BP	regulation of type I interferon production	12863	8850	2.27426
733	0.00221248	477	1082	63	0.0582255	0.132075	GO:0051129	GO:BP	negative regulation of cellular component organization	12863	15739	1.57014
734	0.00230507	71	1082	16	0.0147874	0.225352	GO:0031532	GO:BP	actin cytoskeleton reorganization	12863	8411	2.67902
735	0.0023596	180	1082	30	0.0277264	0.166667	GO:0060537	GO:BP	muscle tissue development	12863	17454	1.98136
736	0.0023596	555	1082	71	0.0656192	0.127928	GO:0035295	GO:BP	tube development	12863	10361	1.52083
737	0.00242637	51	1082	13	0.0120148	0.254902	GO:0034109	GO:BP	homotypic cell-cell adhesion	12863	9746	3.03032
738	0.00242637	172	1082	29	0.0268022	0.168605	GO:0071453	GO:BP	cellular response to oxygen levels	12863	19642	2.0044
739	0.00246428	5	1082	4	0.00369686	0.8	GO:0015990	GO:BP	electron transport coupled proton transport	12863	5682	9.51054
740	0.00246428	5	1082	4	0.00369686	0.8	GO:2000271	GO:BP	positive regulation of fibroblast apoptotic process	12863	29539	9.51054
741	0.00246428	5	1082	4	0.00369686	0.8	GO:0015988	GO:BP	energy coupled proton transmembrane transport, against electrochemical gradient	12863	5680	9.51054
742	0.00246428	5	1082	4	0.00369686	0.8	GO:1903335	GO:BP	regulation of vacuolar transport	12863	26426	9.51054
743	0.00246428	5	1082	4	0.00369686	0.8	GO:0042270	GO:BP	protection from natural killer cell mediated cytotoxicity	12863	11731	9.51054
744	0.002525	156	1082	27	0.0249538	0.173077	GO:0031669	GO:BP	cellular response to nutrient levels	12863	8499	2.05757
745	0.00253323	86	1082	18	0.0166359	0.209302	GO:0002698	GO:BP	negative regulation of immune effector process	12863	1367	2.48822
746	0.00253358	124	1082	23	0.0212569	0.185484	GO:0009267	GO:BP	cellular response to starvation	12863	3899	2.20506
747	0.00254006	303	1082	44	0.0406654	0.145215	GO:0010720	GO:BP	positive regulation of cell development	12863	4902	1.72633
748	0.00256766	101	1082	20	0.0184843	0.19802	GO:0008637	GO:BP	apoptotic mitochondrial changes	12863	3682	2.35409
749	0.00261933	45	1082	12	0.0110906	0.266667	GO:0001910	GO:BP	regulation of leukocyte mediated cytotoxicity	12863	658	3.17018
750	0.00265428	452	1082	60	0.0554529	0.132743	GO:0031400	GO:BP	negative regulation of protein modification process	12863	8363	1.57808
751	0.00265428	577	1082	73	0.0674677	0.126516	GO:0080135	GO:BP	regulation of cellular response to stress	12863	21077	1.50405
752	0.00270655	424	1082	57	0.0526802	0.134434	GO:0006091	GO:BP	generation of precursor metabolites and energy	12863	2150	1.59817
753	0.00271871	233	1082	36	0.0332717	0.154506	GO:0015980	GO:BP	energy derivation by oxidation of organic compounds	12863	5672	1.8368
754	0.00277236	117	1082	22	0.0203327	0.188034	GO:2001236	GO:BP	regulation of extrinsic apoptotic signaling pathway	12863	30449	2.23538
755	0.00277236	117	1082	22	0.0203327	0.188034	GO:0032606	GO:BP	type I interferon production	12863	8919	2.23538
756	0.0027823	22	1082	8	0.00739372	0.363636	GO:0009595	GO:BP	detection of biotic stimulus	12863	4005	4.32297
757	0.0027823	22	1082	8	0.00739372	0.363636	GO:0045577	GO:BP	regulation of B cell differentiation	12863	13429	4.32297
758	0.0027823	17	1082	7	0.0064695	0.411765	GO:0048026	GO:BP	positive regulation of mRNA splicing, via spliceosome	12863	14624	4.89513
759	0.00278492	182	1082	30	0.0277264	0.164835	GO:0061013	GO:BP	regulation of mRNA catabolic process	12863	17915	1.95959
760	0.00279293	149	1082	26	0.0240296	0.174497	GO:0070372	GO:BP	regulation of ERK1 and ERK2 cascade	12863	18982	2.07445
761	0.00279293	149	1082	26	0.0240296	0.174497	GO:0050890	GO:BP	cognition	12863	15542	2.07445
762	0.00279293	149	1082	26	0.0240296	0.174497	GO:0071456	GO:BP	cellular response to hypoxia	12863	19645	2.07445
763	0.00281791	141	1082	25	0.0231054	0.177305	GO:0051651	GO:BP	maintenance of location in cell	12863	16150	2.10783
764	0.00288469	102	1082	20	0.0184843	0.196078	GO:0043618	GO:BP	regulation of transcription from RNA polymerase II promoter in response to stress	12863	12546	2.33101
765	0.00290476	208	1082	33	0.0304991	0.158654	GO:0001503	GO:BP	ossification	12863	439	1.8861
766	0.00309538	279	1082	41	0.0378928	0.146953	GO:0034762	GO:BP	regulation of transmembrane transport	12863	10110	1.74701
767	0.00316111	235	1082	36	0.0332717	0.153191	GO:0071902	GO:BP	positive regulation of protein serine/threonine kinase activity	12863	19970	1.82117
768	0.00319089	46	1082	12	0.0110906	0.26087	GO:0032615	GO:BP	interleukin-12 production	12863	8928	3.10126
769	0.00319089	46	1082	12	0.0110906	0.26087	GO:0050818	GO:BP	regulation of coagulation	12863	15480	3.10126
770	0.00327672	103	1082	20	0.0184843	0.194175	GO:0045580	GO:BP	regulation of T cell differentiation	12863	13432	2.30838
771	0.00329741	307	1082	44	0.0406654	0.143322	GO:0009314	GO:BP	response to radiation	12863	3929	1.70384
772	0.00330615	28	1082	9	0.00831793	0.321429	GO:0009620	GO:BP	response to fungus	12863	4025	3.8212
773	0.00331428	201	1082	32	0.0295749	0.159204	GO:0030522	GO:BP	intracellular receptor signaling pathway	12863	7952	1.89264
774	0.00331428	184	1082	30	0.0277264	0.163043	GO:0032388	GO:BP	positive regulation of intracellular transport	12863	8801	1.93829
775	0.00332204	227	1082	35	0.0323475	0.154185	GO:0006816	GO:BP	calcium ion transport	12863	2806	1.83298
776	0.00332204	159	1082	27	0.0249538	0.169811	GO:0036294	GO:BP	cellular response to decreased oxygen levels	12863	11072	2.01875
777	0.00332204	159	1082	27	0.0249538	0.169811	GO:0002440	GO:BP	production of molecular mediator of immune response	12863	1110	2.01875
778	0.00346694	34	1082	10	0.00924214	0.294118	GO:0043392	GO:BP	negative regulation of DNA binding	12863	12387	3.49652
779	0.00346694	53	1082	13	0.0120148	0.245283	GO:0019730	GO:BP	antimicrobial humoral response	12863	6993	2.91597
780	0.00347385	135	1082	24	0.0221811	0.177778	GO:0006414	GO:BP	translational elongation	12863	2438	2.11345
781	0.00347385	127	1082	23	0.0212569	0.181102	GO:0007611	GO:BP	learning or memory	12863	3506	2.15298
782	0.00352806	281	1082	41	0.0378928	0.145907	GO:0001525	GO:BP	angiogenesis	12863	451	1.73457
783	0.00357254	74	1082	16	0.0147874	0.216216	GO:0050663	GO:BP	cytokine secretion	12863	15381	2.57042
784	0.00358741	13	1082	6	0.00554529	0.461538	GO:0045655	GO:BP	regulation of monocyte differentiation	12863	13507	5.48685
785	0.00358741	13	1082	6	0.00554529	0.461538	GO:0030859	GO:BP	polarized epithelial cell differentiation	12863	8092	5.48685
786	0.00361484	439	1082	58	0.0536044	0.132118	GO:0050767	GO:BP	regulation of neurogenesis	12863	15441	1.57065
787	0.00379943	507	1082	65	0.0600739	0.128205	GO:0051093	GO:BP	negative regulation of developmental process	12863	15710	1.52412
788	0.00380258	459	1082	60	0.0554529	0.130719	GO:0006397	GO:BP	mRNA processing	12863	2422	1.55401
789	0.00380258	23	1082	8	0.00739372	0.347826	GO:0051602	GO:BP	response to electrical stimulus	12863	16105	4.13502
790	0.00384639	47	1082	12	0.0110906	0.255319	GO:0050672	GO:BP	negative regulation of lymphocyte proliferation	12863	15389	3.03528
791	0.00384639	47	1082	12	0.0110906	0.255319	GO:1903573	GO:BP	negative regulation of response to endoplasmic reticulum stress	12863	26650	3.03528
792	0.00384639	47	1082	12	0.0110906	0.255319	GO:0032945	GO:BP	negative regulation of mononuclear cell proliferation	12863	9204	3.03528
793	0.00389848	9	1082	5	0.00462107	0.555556	GO:0030502	GO:BP	negative regulation of bone mineralization	12863	7939	6.60454
794	0.00389848	9	1082	5	0.00462107	0.555556	GO:0070486	GO:BP	leukocyte aggregation	12863	19048	6.60454
795	0.00389848	9	1082	5	0.00462107	0.555556	GO:0001767	GO:BP	establishment of lymphocyte polarity	12863	560	6.60454
796	0.00389848	9	1082	5	0.00462107	0.555556	GO:0034975	GO:BP	protein folding in endoplasmic reticulum	12863	10133	6.60454
797	0.00389848	9	1082	5	0.00462107	0.555556	GO:0045198	GO:BP	establishment of epithelial cell apical/basal polarity	12863	13288	6.60454
798	0.00392112	576	1082	72	0.0665434	0.125	GO:0040007	GO:BP	growth	12863	11534	1.48602
799	0.0039599	1000	1082	114	0.10536	0.114	GO:0045893	GO:BP	positive regulation of transcription, DNA-templated	12863	13725	1.35525
800	0.00397957	18	1082	7	0.0064695	0.388889	GO:0019646	GO:BP	aerobic electron transport chain	12863	6923	4.62318
801	0.00397957	18	1082	7	0.0064695	0.388889	GO:0006123	GO:BP	mitochondrial electron transport, cytochrome c to oxygen	12863	2179	4.62318
802	0.00397957	18	1082	7	0.0064695	0.388889	GO:0042535	GO:BP	positive regulation of tumor necrosis factor biosynthetic process	12863	11899	4.62318
803	0.00397957	18	1082	7	0.0064695	0.388889	GO:0000028	GO:BP	ribosomal small subunit assembly	12863	15	4.62318
804	0.00397957	18	1082	7	0.0064695	0.388889	GO:1901223	GO:BP	negative regulation of NIK/NF-kappaB signaling	12863	24553	4.62318
805	0.00402874	178	1082	29	0.0268022	0.162921	GO:0051271	GO:BP	negative regulation of cellular component movement	12863	15860	1.93684
806	0.0041207	587	1082	73	0.0674677	0.124361	GO:0072359	GO:BP	circulatory system development	12863	20386	1.47843
807	0.00417304	68	1082	15	0.0138632	0.220588	GO:0046634	GO:BP	regulation of alpha-beta T cell activation	12863	14372	2.62239
808	0.00417304	113	1082	21	0.0194085	0.185841	GO:0002822	GO:BP	regulation of adaptive immune response based on somatic recombination of immune receptors built from immunoglobulin superfamily domains	12863	1484	2.20931
809	0.00417304	113	1082	21	0.0194085	0.185841	GO:0071248	GO:BP	cellular response to metal ion	12863	19450	2.20931
810	0.0041918	137	1082	24	0.0221811	0.175182	GO:0043523	GO:BP	regulation of neuron apoptotic process	12863	12483	2.0826
811	0.00419248	90	1082	18	0.0166359	0.2	GO:0007259	GO:BP	receptor signaling pathway via JAK-STAT	12863	3186	2.37763
812	0.00420937	2256	1082	231	0.213494	0.102394	GO:1903506	GO:BP	regulation of nucleic acid-templated transcription	12863	26585	1.21727
813	0.00421568	29	1082	9	0.00831793	0.310345	GO:0042088	GO:BP	T-helper 1 type immune response	12863	11613	3.68943
814	0.00434417	222	1082	34	0.0314233	0.153153	GO:0051235	GO:BP	maintenance of location	12863	15833	1.82071
815	0.00441765	2258	1082	231	0.213494	0.102303	GO:2001141	GO:BP	regulation of RNA biosynthetic process	12863	30362	1.21619
816	0.00443931	530	1082	67	0.0619224	0.126415	GO:0051345	GO:BP	positive regulation of hydrolase activity	12863	15925	1.50284
817	0.00445262	83	1082	17	0.0157116	0.204819	GO:0051101	GO:BP	regulation of DNA binding	12863	15718	2.43493
818	0.00454278	609	1082	75	0.0693161	0.123153	GO:0048666	GO:BP	neuron development	12863	15095	1.46406
819	0.00454278	276	1082	40	0.0369686	0.144928	GO:0045862	GO:BP	positive regulation of proteolysis	12863	13698	1.72292
820	0.00476695	551	1082	69	0.0637708	0.125227	GO:0031175	GO:BP	neuron projection development	12863	8277	1.48872
821	0.00488051	259	1082	38	0.0351201	0.146718	GO:0050769	GO:BP	positive regulation of neurogenesis	12863	15443	1.74421
822	0.00498324	172	1082	28	0.025878	0.162791	GO:2001234	GO:BP	negative regulation of apoptotic signaling pathway	12863	30447	1.93528
823	0.00498324	323	1082	45	0.0415896	0.139319	GO:0048514	GO:BP	blood vessel morphogenesis	12863	14964	1.65625
824	0.00502388	484	1082	62	0.0573013	0.128099	GO:0051960	GO:BP	regulation of nervous system development	12863	16361	1.52286
825	0.00504289	42	1082	11	0.0101664	0.261905	GO:0045646	GO:BP	regulation of erythrocyte differentiation	12863	13498	3.11357
826	0.00504289	42	1082	11	0.0101664	0.261905	GO:0072678	GO:BP	T cell migration	12863	20585	3.11357
827	0.00504289	42	1082	11	0.0101664	0.261905	GO:2001238	GO:BP	positive regulation of extrinsic apoptotic signaling pathway	12863	30451	3.11357
828	0.00504289	42	1082	11	0.0101664	0.261905	GO:0045670	GO:BP	regulation of osteoclast differentiation	12863	13522	3.11357
829	0.00504289	42	1082	11	0.0101664	0.261905	GO:0060760	GO:BP	positive regulation of response to cytokine stimulus	12863	17667	3.11357
830	0.00507269	84	1082	17	0.0157116	0.202381	GO:0002576	GO:BP	platelet degranulation	12863	1245	2.40594
831	0.00507998	582	1082	72	0.0665434	0.123711	GO:0048646	GO:BP	anatomical structure formation involved in morphogenesis	12863	15075	1.4707
832	0.00508757	107	1082	20	0.0184843	0.186916	GO:0019079	GO:BP	viral genome replication	12863	6491	2.22209
833	0.00508757	233	1082	35	0.0323475	0.150215	GO:0034599	GO:BP	cellular response to oxidative stress	12863	10043	1.78578
834	0.00512614	164	1082	27	0.0249538	0.164634	GO:0043488	GO:BP	regulation of mRNA stability	12863	12463	1.9572
835	0.00517332	123	1082	22	0.0203327	0.178862	GO:0009612	GO:BP	response to mechanical stimulus	12863	4019	2.12634
836	0.00522556	2866	1082	285	0.263401	0.0994417	GO:0006464	GO:BP	cellular protein modification process	12863	2477	1.18218
837	0.00522556	2866	1082	285	0.263401	0.0994417	GO:0036211	GO:BP	protein modification process	12863	11011	1.18218
838	0.00527306	418	1082	55	0.0508318	0.131579	GO:1903827	GO:BP	regulation of cellular protein localization	12863	26878	1.56423
839	0.00534202	36	1082	10	0.00924214	0.277778	GO:0032613	GO:BP	interleukin-10 production	12863	8926	3.30227
840	0.00539198	30	1082	9	0.00831793	0.3	GO:0045730	GO:BP	respiratory burst	12863	13578	3.56645
841	0.00539198	30	1082	9	0.00831793	0.3	GO:0072091	GO:BP	regulation of stem cell proliferation	12863	20129	3.56645
842	0.00542243	14	1082	6	0.00554529	0.428571	GO:0098543	GO:BP	detection of other organism	12863	22201	5.09493
843	0.00542243	2400	1082	243	0.224584	0.10125	GO:0097659	GO:BP	nucleic acid-templated transcription	12863	22117	1.20368
844	0.00542243	14	1082	6	0.00554529	0.428571	GO:0045672	GO:BP	positive regulation of osteoclast differentiation	12863	13524	5.09493
845	0.00542243	14	1082	6	0.00554529	0.428571	GO:0001911	GO:BP	negative regulation of leukocyte mediated cytotoxicity	12863	659	5.09493
846	0.00542901	49	1082	12	0.0110906	0.244898	GO:0050854	GO:BP	regulation of antigen receptor-mediated signaling pathway	12863	15510	2.91139
847	0.00542901	49	1082	12	0.0110906	0.244898	GO:0070664	GO:BP	negative regulation of leukocyte proliferation	12863	19155	2.91139
848	0.00547156	3	1082	3	0.00277264	1	GO:0045728	GO:BP	respiratory burst after phagocytosis	12863	13576	11.8882
849	0.00547156	3	1082	3	0.00277264	1	GO:1904582	GO:BP	positive regulation of intracellular mRNA localization	12863	27570	11.8882
850	0.00547156	3	1082	3	0.00277264	1	GO:1904580	GO:BP	regulation of intracellular mRNA localization	12863	27568	11.8882
851	0.00547156	3	1082	3	0.00277264	1	GO:0002484	GO:BP	antigen processing and presentation of endogenous peptide antigen via MHC class I via ER pathway	12863	1154	11.8882
852	0.00547156	3	1082	3	0.00277264	1	GO:1902565	GO:BP	positive regulation of neutrophil activation	12863	25758	11.8882
853	0.00547156	3	1082	3	0.00277264	1	GO:0043315	GO:BP	positive regulation of neutrophil degranulation	12863	12344	11.8882
854	0.00547156	3	1082	3	0.00277264	1	GO:0002486	GO:BP	antigen processing and presentation of endogenous peptide antigen via MHC class I via ER pathway, TAP-independent	12863	1156	11.8882
855	0.00547156	270	1082	39	0.0360444	0.144444	GO:0062197	GO:BP	cellular response to chemical stress	12863	18741	1.71718
856	0.00548487	19	1082	7	0.0064695	0.368421	GO:0086004	GO:BP	regulation of cardiac muscle cell contraction	12863	21163	4.37985
857	0.00548487	19	1082	7	0.0064695	0.368421	GO:0001916	GO:BP	positive regulation of T cell mediated cytotoxicity	12863	664	4.37985
858	0.0055749	56	1082	13	0.0120148	0.232143	GO:0051591	GO:BP	response to cAMP	12863	16094	2.75975
859	0.0055749	56	1082	13	0.0120148	0.232143	GO:0042100	GO:BP	B cell proliferation	12863	11618	2.75975
860	0.00558308	63	1082	14	0.012939	0.222222	GO:0032649	GO:BP	regulation of interferon-gamma production	12863	8962	2.64182
861	0.00577707	401	1082	53	0.0489834	0.13217	GO:0120035	GO:BP	regulation of plasma membrane bounded cell projection organization	12863	22956	1.57125
862	0.00588751	149	1082	25	0.0231054	0.167785	GO:0009636	GO:BP	response to toxic substance	12863	4039	1.99466
863	0.00593238	6	1082	4	0.00369686	0.666667	GO:0090647	GO:BP	modulation of age-related behavioral decline	12863	21745	7.92545
864	0.00593238	6	1082	4	0.00369686	0.666667	GO:0001765	GO:BP	membrane raft assembly	12863	558	7.92545
865	0.00593933	93	1082	18	0.0166359	0.193548	GO:0097696	GO:BP	receptor signaling pathway via STAT	12863	22125	2.30094
866	0.00599732	78	1082	16	0.0147874	0.205128	GO:1990266	GO:BP	neutrophil migration	12863	28957	2.4386
867	0.00599732	78	1082	16	0.0147874	0.205128	GO:0009060	GO:BP	aerobic respiration	12863	3698	2.4386
868	0.00607791	402	1082	53	0.0489834	0.131841	GO:0000904	GO:BP	cell morphogenesis involved in differentiation	12863	314	1.56735
869	0.00623427	125	1082	22	0.0203327	0.176	GO:0061025	GO:BP	membrane fusion	12863	17921	2.09232
870	0.00623427	412	1082	54	0.0499076	0.131068	GO:0050877	GO:BP	nervous system process	12863	15530	1.55816
871	0.00629734	71	1082	15	0.0138632	0.211268	GO:0046425	GO:BP	regulation of receptor signaling pathway via JAK-STAT	12863	14229	2.51159
872	0.00648088	184	1082	29	0.0268022	0.157609	GO:0002449	GO:BP	lymphocyte mediated immunity	12863	1119	1.87368
873	0.00648974	37	1082	10	0.00924214	0.27027	GO:0032663	GO:BP	regulation of interleukin-2 production	12863	8976	3.21302
874	0.00648974	25	1082	8	0.00739372	0.32	GO:0050690	GO:BP	regulation of defense response to virus by virus	12863	15404	3.80421
875	0.00648974	37	1082	10	0.00924214	0.27027	GO:0090303	GO:BP	positive regulation of wound healing	12863	21521	3.21302
876	0.00648974	25	1082	8	0.00739372	0.32	GO:0002707	GO:BP	negative regulation of lymphocyte mediated immunity	12863	1376	3.80421
877	0.00657286	10	1082	5	0.00462107	0.5	GO:0002716	GO:BP	negative regulation of natural killer cell mediated immunity	12863	1385	5.94409
878	0.00657286	10	1082	5	0.00462107	0.5	GO:0048385	GO:BP	regulation of retinoic acid receptor signaling pathway	12863	14884	5.94409
879	0.00657286	10	1082	5	0.00462107	0.5	GO:0045953	GO:BP	negative regulation of natural killer cell mediated cytotoxicity	12863	13781	5.94409
880	0.00657286	228	1082	34	0.0314233	0.149123	GO:0030111	GO:BP	regulation of Wnt signaling pathway	12863	7768	1.7728
881	0.00659916	319	1082	44	0.0406654	0.137931	GO:0023061	GO:BP	signal release	12863	7717	1.63975
882	0.00661365	246	1082	36	0.0332717	0.146341	GO:0034976	GO:BP	response to endoplasmic reticulum stress	12863	10134	1.73973
883	0.00663333	2410	1082	243	0.224584	0.10083	GO:0032774	GO:BP	RNA biosynthetic process	12863	9085	1.19868
884	0.00663485	94	1082	18	0.0166359	0.191489	GO:0002758	GO:BP	innate immune response-activating signal transduction	12863	1421	2.27646
885	0.00668742	31	1082	9	0.00831793	0.290323	GO:0001912	GO:BP	positive regulation of leukocyte mediated cytotoxicity	12863	660	3.4514
886	0.00671427	134	1082	23	0.0212569	0.171642	GO:0071241	GO:BP	cellular response to inorganic substance	12863	19443	2.04051
887	0.00677662	433	1082	56	0.051756	0.12933	GO:0022411	GO:BP	cellular component disassembly	12863	7642	1.5375
888	0.00677662	79	1082	16	0.0147874	0.202532	GO:0048525	GO:BP	negative regulation of viral process	12863	14975	2.40773
889	0.00677662	79	1082	16	0.0147874	0.202532	GO:0000041	GO:BP	transition metal ion transport	12863	18	2.40773
890	0.00697215	151	1082	25	0.0231054	0.165563	GO:0042594	GO:BP	response to starvation	12863	11927	1.96824
891	0.00704885	405	1082	53	0.0489834	0.130864	GO:0031344	GO:BP	regulation of cell projection organization	12863	8340	1.55574
892	0.00716779	44	1082	11	0.0101664	0.25	GO:0045851	GO:BP	pH reduction	12863	13687	2.97204
893	0.00716779	44	1082	11	0.0101664	0.25	GO:0046635	GO:BP	positive regulation of alpha-beta T cell activation	12863	14373	2.97204
894	0.00716779	44	1082	11	0.0101664	0.25	GO:0030888	GO:BP	regulation of B cell proliferation	12863	8103	2.97204
895	0.00716779	87	1082	17	0.0157116	0.195402	GO:0048660	GO:BP	regulation of smooth muscle cell proliferation	12863	15089	2.32298
[truncated: 589 more rows]

## Sheet: CD14 Monocytes 2
	p_value	term_size	query_size	intersection_size	precision	recall	term_id	source	term_name	effective_domain_size	source_order	foldenrichment
[truncated: 1,139 more rows]

[truncated: 11 more sheets: CD14 Monocytes 3, CD14 Monocytes 4, CD14 Monocytes 5, All CD14 Monocytes, NK Cells 1, NK Cells 2, All NK Cells, B Cells 1, B Cells 2, B Cells 3, All B Cells]
