# Supplementary material for: Single-cell immunophenotyping of the fetal immune response to maternal SARS-CoV-2 infection in late gestation
Source: Research Square preprint supplement (doi:10.21203/rs.3.rs-311000/v1), 2021-03-16
Supplement: Supplementary file [file dc60fde2b2ab52a4d411a62b.pdf]

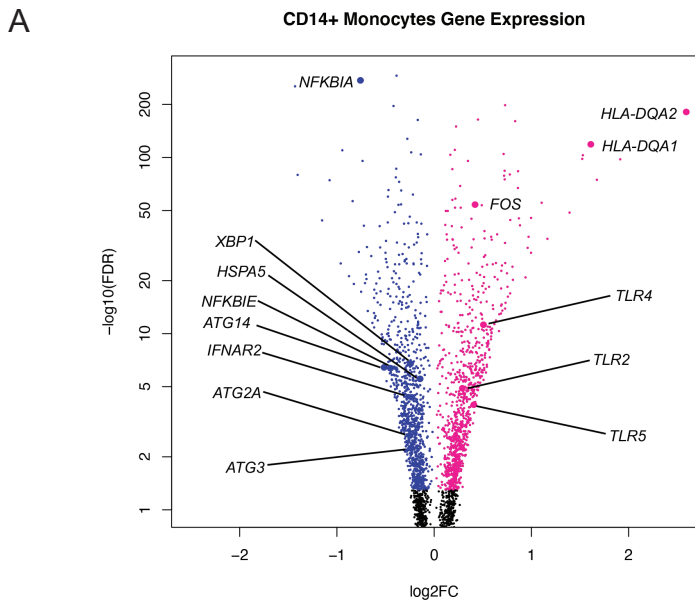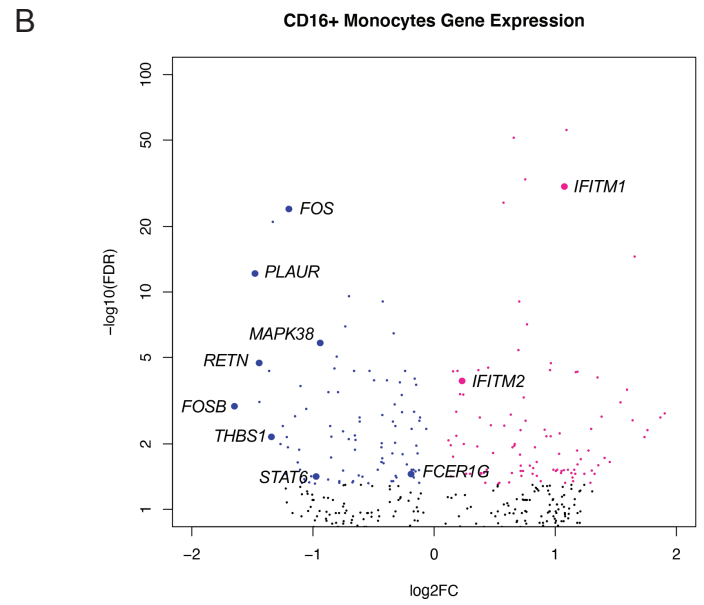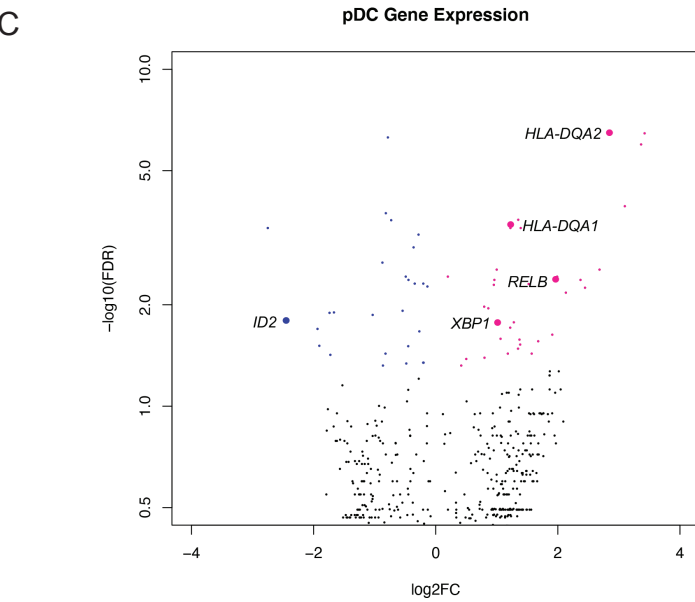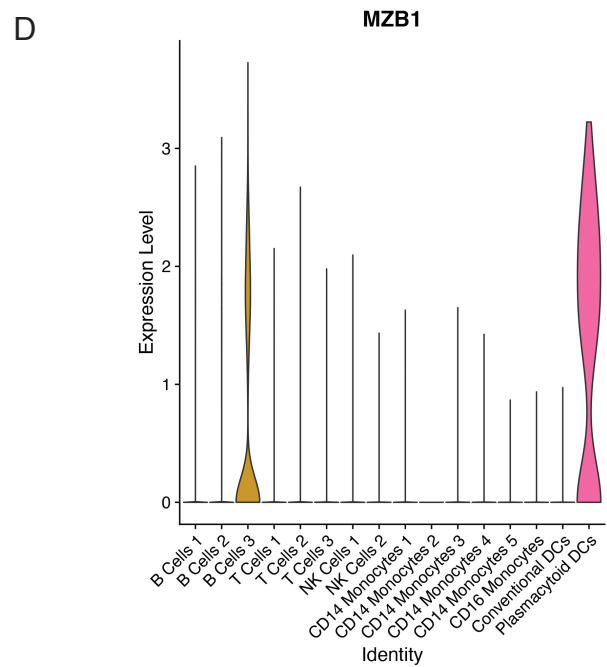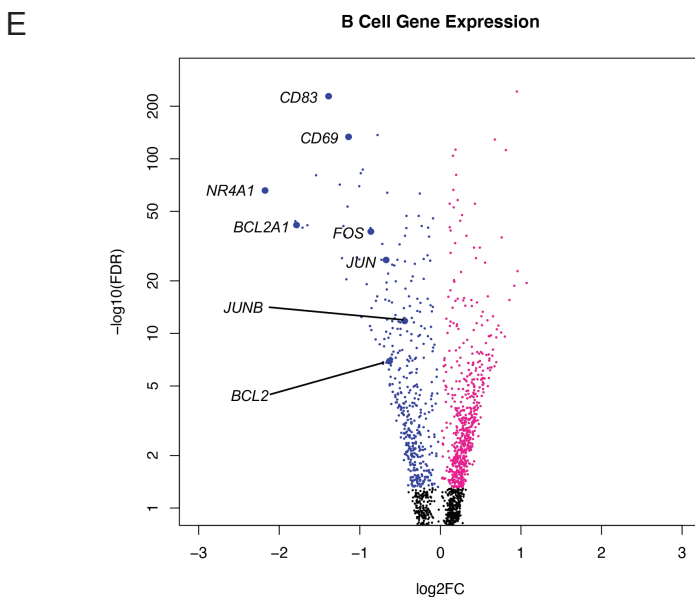

#### SUPPLEMENTAL FIGURE 2:

A. Volcano plot of DGE between cases and controls in CD14+ Monocytes. Colored dots indicate statistical significance (FDR<0.05). Positive log2FC (pink dots) indicates higher expression in cases, and negative log2FC (blue dots) indicates higher expression in controls. N=3 samples per group.

B. Volcano plot of DGE between cases and controls in CD16+ Monocytes. Colored dots indicate statistical significance (FDR<0.05). Positive log2FC (pink dots) indicates higher expression in cases, and negative log2FC (blue dots) indicates higher expression in controls. N=3 samples per group.

C. Volcano plot of DGE between cases and controls in pDCs. Colored dots indicate statistical significance (FDR<0.05). Positive log2FC (pink dots) indicates higher expression in cases, and negative log2FC (blue dots) indicates higher expression in controls. N=3 samples per group.

D. Violin plot of MZB1 expression across different cell clusters.

E. Volcano plot of DGE between cases and controls in B cells. Colored dots indicate statistical significance (FDR<0.05). Positive log2FC (pink dots) indicates higher expression in cases, and negative log2FC (blue dots) indicates higher expression in controls. N=3 samples per group.
